# Supplementary material for: A pan-cancer analysis of the oncogenic role of zinc finger protein 419 in human cancer
Source: Front Oncol. 2022 Dec 12;12:1042118. doi: 10.3389/fonc.2022.1042118 (PMC9791222; doi:10.3389/fonc.2022.1042118)
Supplement: Supplementary file 2 [file DataSheet_2.xlsx]

## Sheet: LUSC
ZNF419	CDKN1A	HSPA5	EMC2	SLC7A11	NFE2L2	MT1G	HSPB1	GPX4	FANCD2	CISD1	FDFT1	SLC1A5	SAT1	TFRC	RPL8	NCOA4	LPCAT3	GLS2	DPP4	CS	ALOX15	ACSL4
2.54626	7.95959	8.76002	4.95431	0.95132	6.69883	4.71483	10.4355	7.24276	1.69617	4.78267	6.15763	5.3462	10.1538	6.12196	11.0899	7.67932	2.91109	0.135988	1.57185	5.14073	0.647889	4.89257
1.58401	7.18601	9.34805	5.07756	5.69284	8.08821	2.52124	10.5525	7.18154	3.03692	4.86551	7.49813	7.95203	9.79223	8.12109	10.985	7.31137	4.36576	0.438605	3.61005	5.97754	6.31813	6.0274
2.33342	6.7334	9.41578	5.92774	6.57334	8.36751	1.43443	5.95209	8.55168	2.69992	5.54758	6.8609	7.33985	9.42168	7.0935	10.1774	8.19826	4.77311	0.944998	3.16536	6.74866	4.23901	6.36866
2.58929	6.79127	8.91346	4.89997	1.22929	6.46704	4.90837	9.16805	7.3424	2.65161	4.62173	6.1159	5.70186	8.2842	5.44381	11.4671	7.9758	4.11533	0.43077	5.75768	5.9908	2.97143	6.02544
2.49646	8.30675	8.9937	5.2493	2.26699	6.48637	5.60228	9.08366	10.2294	4.09907	6.44163	8.35809	5.63602	8.33434	8.59797	11.2312	7.48212	3.83566	2.03054	3.85811	6.82443	0.608012	4.63921
1.92303	6.77127	9.63766	5.02888	5.63661	7.20059	4.70197	10.312	8.17152	3.58145	5.27637	7.38236	8.15284	8.42975	9.18412	12.1405	7.78887	4.46833	1.65235	1.36645	6.14166	8.26059	5.71541
1.2322	7.23139	8.80588	4.59369	5.27002	7.60769	3.72848	11.6944	8.03883	3.34674	5.15871	6.66288	8.2568	9.60931	8.90003	12.0031	7.35043	5.531	2.5077	1.83866	6.53369	4.06782	7.13989
2.87174	7.94596	9.05943	5.55532	1.8759	7.31169	4.30938	11.2725	9.02208	3.58684	5.52587	7.85157	7.86097	10.3382	7.04627	11.5009	8.33361	4.82587	0.862636	2.12439	6.73467	5.77765	4.8513
1.31736	7.72472	9.6047	5.06123	5.41999	7.70677	3.09095	10.9332	8.50397	3.20902	5.75886	7.52267	7.62814	9.3208	9.00863	11.0219	7.84491	4.41341	0.603829	2.7578	5.96013	3.19786	5.25224
1.62928	6.63724	9.04907	5.23371	6.52755	8.86827	2.40247	10.9402	8.10542	3.8393	6.04394	7.37056	8.0844	10.6008	9.30102	11.1341	7.89404	5.27736	1.62716	1.09151	6.74832	0.124273	5.44795
1.42338	7.9583	9.9128	4.66073	2.08594	6.22685	2.30283	10.9356	8.5559	2.59405	4.88333	6.53362	8.28765	8.11077	7.01937	11.855	7.49228	5.92635	1.10184	2.04428	6.29336	0.0533732	5.19525
0.553678	6.57657	9.03651	6.06925	3.11685	6.67088	3.3313	11.4047	8.29778	3.99069	4.97503	6.34185	7.84831	9.9904	9.27136	10.8077	7.96215	4.46305	0.903951	0.894311	6.49967	2.20396	4.66787
1.81249	7.21912	8.59204	5.46023	2.59957	6.95929	6.33618	10.1328	8.89823	3.84315	6.119	7.80671	7.94081	9.69129	10.17	12.9666	7.52441	3.71118	0.721373	1.74938	5.90341	2.84048	5.34836
2.51697	6.0827	8.97148	4.72841	2.58851	8.11254	3.75033	10.9287	7.91077	4.42044	4.3048	5.97569	7.57179	7.79421	9.39369	10.7002	6.49892	4.19582	2.15036	4.70668	6.93406	0.554453	5.01802
1.51559	7.49662	8.88995	4.91379	6.12217	7.6989	4.04644	11.0789	8.5876	3.08148	5.2541	7.55147	8.03833	9.15327	9.04843	11.1582	7.54051	4.38075	1.29604	2.28609	6.78487	1.04221	5.3445
1.69947	7.38806	9.55925	5.14771	5.66097	8.13144	2.6534	9.75734	8.28146	3.71107	4.81184	7.27305	8.353	9.04795	7.66771	11.1675	7.51412	5.84886	2.34286	3.59262	6.73012	0.32173	5.1813
0.958455	7.28907	9.90336	5.21438	4.30629	7.99098	2.15411	10.5173	8.2129	3.79433	5.75849	6.15286	8.27264	7.7887	8.47448	11.4811	7.65424	6.25976	0.467453	1.88324	7.54054	0.148766	5.02579
1.5149	7.87325	9.24549	5.88449	7.76844	7.69849	2.90781	11.7255	8.24826	4.933	4.95149	7.33372	8.76924	7.92008	9.4039	11.9168	7.78804	4.89861	2.46619	2.43995	7.35504	3.50933	4.29819
1.64693	7.58941	9.23117	5.19101	2.35419	6.80211	3.99155	10.0379	7.00304	3.07476	5.35067	5.69471	7.97758	9.7443	6.76006	10.5463	8.07698	4.87242	0.775041	4.20255	6.9437	2.54989	5.22213
2.39188	7.0515	9.99123	5.59312	6.93611	7.64625	3.65533	9.74161	8.17598	4.0093	5.55909	7.26874	8.82755	10.7305	8.31719	10.1688	7.62342	4.50498	0.206299	2.81053	6.8389	0.753343	5.76694
2.65415	7.43886	10.4764	5.51228	6.70442	8.05674	1.73124	10.0392	8.28202	4.25688	4.75092	7.44844	8.03044	10.4678	10.1283	11.0876	7.44247	4.59628	0.520266	2.08092	6.86171	0.511968	6.37284
2.04627	6.60441	9.0134	6.16868	7.16872	8.39492	1.7735	10.8931	8.50684	4.29681	5.1061	7.73306	8.44451	8.97404	9.22062	11.6496	6.89751	3.68433	0.887233	2.14898	6.49232	0.31295	4.87771
2.58715	7.5783	9.28585	5.8615	5.1639	7.52235	3.25408	10.0537	8.16909	3.20215	4.10044	6.28838	7.22732	9.96019	9.56033	10.3622	7.7546	4.19387	1.00118	3.84863	6.46878	0.622785	5.67078
2.41572	7.8137	9.30505	5.95651	6.22754	7.5953	4.40534	9.88687	8.19936	3.028	4.09718	6.29962	7.33376	9.91169	9.84332	10.0889	7.87992	3.90126	0.681055	3.80509	6.48761	0.636168	5.70577
1.63726	7.14721	9.57151	4.60514	4.61412	8.2705	5.04683	11.2891	8.47836	3.16003	4.55279	7.45078	7.6129	9.37301	8.92207	11.6974	7.37141	4.28275	1.47891	2.9064	6.79575	1.0017	5.12961
2.2259	8.85359	8.6549	4.75447	1.1602	7.09524	0.955134	11.3164	8.55634	3.02932	3.95216	7.47096	6.892	7.1708	4.94666	12.0471	7.90606	4.5569	0.983779	0.610798	6.94499	1.4993	4.39626
2.28493	9.14621	9.1512	5.04922	2.10162	6.42717	3.09487	10.9735	8.32919	2.33683	4.45429	6.39504	8.1436	8.21128	6.97562	10.4779	7.37088	4.26521	0.0679446	3.64784	5.86514	0.0553463	5.74267
1.59489	7.15127	9.44729	5.47643	1.57215	7.25398	8.59372	11.044	8.792	3.56457	5.10061	5.76515	7.81105	8.72927	7.94871	13.2226	8.31869	4.94487	1.00868	1.53315	7.03182	1.05471	4.53458
2.8345	7.17279	8.96349	5.11069	4.35712	7.10647	4.22598	11.9246	7.72444	4.21329	4.16973	6.52745	9.14203	8.36324	8.36318	10.8499	6.38038	5.01472	0.583685	2.94471	6.67748	3.32753	3.64416
2.80596	7.93802	8.65087	4.75785	1.8714	6.20249	3.85044	10.5047	8.58839	3.09684	3.98109	6.95523	8.18307	9.52027	8.01533	10.4869	6.30845	3.99327	0.586441	2.68397	6.43632	3.22999	3.45217
1.81346	6.30525	8.28821	5.33616	5.58746	6.46233	4.8568	9.91523	8.49231	4.12887	5.4687	6.15284	7.68979	9.30637	8.56091	11.2925	7.80768	4.78945	1.98066	1.76824	7.65756	0.250279	6.32503
1.8979	8.28876	9.71623	4.62009	1.68515	6.12044	5.53043	11.2665	8.58932	2.9019	4.39798	6.01767	8.06577	9.03887	7.99134	11.7098	6.24524	4.63623	0.986718	2.81326	6.12129	4.41751	3.26847
2.70276	7.94632	10.2236	5.89307	1.93305	6.04961	5.02664	10.8199	7.58478	4.15749	4.21246	5.78595	6.81654	8.53353	7.96386	11.7498	6.84812	4.26289	1.7627	3.09025	7.05933	0.619891	5.57937
1.65994	7.63655	9.52297	5.38082	0.512523	7.29151	4.93291	12.9916	9.01314	2.06373	4.97584	6.91707	8.56754	10.1411	5.786	11.2353	6.86056	3.49317	0.537626	2.96592	5.4121	5.07469	4.53774
2.41363	7.48586	9.24597	4.98501	1.27404	5.2788	4.48297	11.067	8.25212	3.16288	4.83008	7.18844	7.93907	8.6238	7.72539	12.2088	7.58783	4.82823	0.301944	4.92474	6.51674	1.23181	4.53328
1.57741	6.36215	9.21524	5.77502	2.67832	5.25698	6.82666	8.31776	9.34584	3.18905	5.04517	5.03971	8.74786	8.65351	6.51941	11.7933	7.47967	2.92034	0.137642	2.88034	6.90955	1.69271	5.19173
3.10721	7.70726	9.24422	5.70057	3.184	7.97613	2.76751	12.0436	8.7598	2.89746	4.74309	6.29342	8.16504	10.9866	8.15189	11.1551	7.43419	5.03426	0.536974	1.26802	6.16353	0.165946	5.56961
1.30518	6.62535	9.78164	4.65041	4.21067	7.17629	2.31428	12.405	7.54428	2.86735	5.09868	6.58646	7.59947	10.4561	8.19564	11.1002	7.35992	4.50718	0.407192	3.19129	6.94642	2.48448	5.26375
1.77169	8.60266	9.35142	5.30311	5.11175	8.33409	3.06717	11.6038	8.50561	2.73337	4.70783	8.25615	6.90629	9.56555	8.66382	11.5012	7.14594	3.73266	1.57349	4.8459	6.69236	1.8778	4.89193
1.53086	7.68221	9.21532	4.70905	1.06254	6.87941	3.73159	11.3215	8.23516	2.29126	4.41052	6.83074	7.35027	9.28825	5.79788	10.5207	7.22898	3.91185	0.231439	4.10897	5.88157	3.68245	5.42953
2.1706	8.04733	9.23322	5.02729	4.39048	7.20106	5.03104	10.0854	7.53211	3.12942	4.55441	5.68938	8.00921	8.90435	6.75289	10.8026	7.51319	4.66408	0.674335	4.68383	6.76061	1.57538	5.37796
1.40319	5.96817	8.59435	4.12787	1.39865	5.2833	2.95406	8.35408	7.42082	2.28837	3.61356	4.91211	6.71188	9.17634	4.03167	10.1995	6.34216	2.72465	0.351657	3.41416	5.29963	3.91371	4.79762
2.30133	7.48301	9.51986	4.99046	1.426	6.72196	5.04566	10.8647	7.72035	3.16325	3.90472	7.40615	7.72013	9.28405	5.67521	10.2453	7.34406	4.76679	0.507351	1.95586	5.97618	2.20756	5.48978
0.559137	7.76057	8.61198	5.05934	2.95503	7.04899	7.64114	11.2113	9.15504	3.68351	4.70395	6.74951	7.83833	9.26516	9.27033	11.9285	6.63382	4.36437	2.43503	2.74807	6.54207	0.38885	4.24474
3.33293	7.758	9.25937	5.21312	2.24154	6.57691	5.00731	9.13861	7.46253	3.51233	4.1341	6.10465	6.77883	9.37071	7.05287	11.256	7.9178	4.88062	0.95468	5.23083	6.86639	2.63444	6.18764
2.19855	6.64461	10.1116	6.35838	2.79571	6.46035	3.7599	10.4353	8.67255	2.83308	3.91304	6.26301	7.04671	9.37376	5.98794	10.6645	7.59861	4.42969	1.07133	9.08147	7.58398	2.30296	5.54893
1.69132	6.94435	9.73289	5.3791	6.50471	7.82865	3.23521	10.0734	8.38783	3.61619	5.19828	6.96517	9.05712	8.46872	7.09125	11.043	10.0804	4.1991	1.93834	2.80351	6.44021	8.00116	5.13714
1.89517	6.81801	9.26057	4.70534	2.46475	6.16796	3.13708	11.1932	8.1946	4.57545	4.50356	8.68367	7.16604	7.99764	9.87869	11.3998	6.96818	4.44806	0.952331	3.56826	6.92903	8.22803	6.84024
1.27912	5.59784	9.09309	5.15468	4.65355	5.55709	4.78508	8.36674	8.12505	2.66223	5.21552	5.92183	6.53645	8.08359	5.85499	10.8648	7.75914	3.19603	1.05008	6.10679	6.13785	1.09851	4.3815
2.57771	8.33159	9.36941	4.59483	1.93521	5.37433	3.08923	9.43511	8.26606	3.09499	3.78988	7.1344	6.90858	8.65697	7.88934	10.2276	7.06986	5.01644	1.0025	3.36076	6.43506	1.90821	4.44341
1.82097	7.40665	9.19541	5.77376	2.44007	5.91017	4.79052	10.7665	8.83748	2.41928	4.60846	5.86307	7.2243	9.31068	5.693	11.8394	7.75507	3.70881	0.313727	6.2699	6.43407	4.24491	5.90569
2.5467	5.52294	9.39211	4.58863	3.82624	7.84763	2.60896	9.29765	8.59474	3.01249	4.33351	7.37794	8.82386	9.28288	9.50872	10.8871	7.16543	5.15115	1.0139	2.41827	6.14293	4.07133	5.63975
2.65934	8.59531	9.75269	5.1997	6.40218	9.96109	3.42463	10.3663	7.66284	3.1231	4.02247	6.55303	8.58504	9.46394	6.82396	10.7154	7.25317	4.12101	1.45089	2.70286	7.15087	1.60237	4.17302
1.90607	8.06932	9.52096	4.79608	2.67921	7.20744	6.84347	10.1333	8.33271	2.43758	4.44875	6.06404	7.72765	8.82439	8.25354	12.1454	7.52108	3.99505	2.9798	3.25498	7.35919	0.828415	4.92127
1.3464	8.28788	9.10297	5.59024	6.53516	7.88498	4.95965	10.8298	8.42885	2.37214	4.66072	6.41077	8.40921	9.70021	7.13229	10.5004	7.47487	4.1501	0.400662	3.87961	6.12878	4.16822	5.10577
2.00941	8.62185	8.08135	4.68645	1.91148	7.0913	5.07618	10.7071	8.51511	2.14161	5.66758	7.47473	7.84561	10.8048	6.83262	11.4709	7.60517	3.81768	0.670649	1.75046	6.54842	3.95466	4.62967
1.72849	7.54743	9.61265	5.0927	2.99645	7.86321	4.17066	10.8309	7.49055	2.79857	3.83558	6.51014	7.36444	9.12912	6.98093	10.8407	7.75836	4.0939	0.495664	4.41388	6.46727	2.20324	6.17159
1.90183	6.54771	8.76256	4.96725	2.81705	8.47731	3.76715	10.5171	8.71577	3.58412	4.31208	6.79924	7.39905	8.86214	9.47954	11.8177	7.1416	4.8834	2.76835	1.90675	7.15333	5.56381	4.94294
1.85838	7.16197	9.44758	4.73614	2.56627	7.23001	3.29298	11.2492	9.05238	3.37831	4.8819	5.75673	8.0284	9.01452	6.50953	11.0384	7.68052	5.25064	1.47904	1.74151	6.66221	0.674108	4.62193
1.78095	7.79462	9.07263	5.55116	1.08435	8.52692	4.46288	11.1786	8.58684	2.86199	4.97204	6.68875	8.20139	10.6838	6.66795	11.1914	8.45817	5.17825	1.11092	4.53812	6.83812	8.66482	5.7887
2.12221	6.96093	9.39749	5.11832	6.37641	8.55947	2.89901	11.8679	8.90497	3.55119	4.99323	7.10835	8.59745	8.80218	10.0359	11.513	6.37611	5.63589	1.19836	2.98038	6.6236	2.91103	4.50053
1.66199	6.88718	9.41514	5.31911	5.65761	8.00385	3.72144	10.729	8.2738	3.50163	4.48293	7.73516	8.21768	8.984	8.83754	10.8906	7.4238	4.36288	1.22277	1.684	6.65454	4.49034	4.47252
2.96365	6.17784	9.73435	4.69407	7.28809	7.9176	2.42436	9.9309	8.34575	4.03911	5.37054	6.71874	8.87865	8.7423	9.58233	11.1214	7.57426	6.07023	2.48921	2.09425	7.58891	2.13588	5.67651
2.39884	8.27737	9.766	5.48438	2.19547	6.04436	2.98733	10.5822	8.83523	3.08965	5.24153	6.31166	8.11701	9.11302	6.93429	10.7044	7.46755	4.19539	1.35818	2.45078	6.38335	6.25916	5.02704
2.01642	6.91587	9.75731	5.23054	5.86743	8.05497	4.34239	11.6647	8.64232	3.59492	4.55425	7.45206	8.38817	8.19918	8.85337	11.7126	6.22763	4.58791	0.202481	1.91191	6.05918	4.901	5.47785
2.38813	7.22678	9.68415	4.76041	1.75466	6.1018	5.42384	8.99256	9.24276	3.4852	4.65105	6.59005	6.73566	7.57268	6.8309	11.925	7.40735	4.08465	0.871504	3.27605	7.3963	0.208216	6.86091
2.56619	7.03802	8.07745	5.53047	2.96984	5.81461	8.15738	7.64926	8.48275	3.69676	5.17439	6.54906	6.8771	7.03219	4.85831	12.3691	6.50789	3.11713	1.18896	1.334	6.6641	0.0685415	5.13011
1.89892	8.62114	9.65482	5.58443	6.08063	7.98669	2.88474	11.8764	8.70414	2.46228	4.92005	7.60324	8.52027	8.72673	8.81546	11.7305	7.40413	4.77416	1.04399	1.93544	6.85182	0.189915	4.42469
2.13846	6.62859	9.62092	5.46489	6.19432	7.05163	5.19216	8.4137	8.25483	4.18415	4.22911	8.05087	9.80744	9.86613	8.25928	11.1034	6.8063	3.45597	0.366869	1.78126	6.78645	3.00231	5.53665
2.23176	7.29571	10.2878	5.81615	6.2582	7.06873	3.83386	10.907	9.73025	3.72449	5.55707	7.00106	10.2688	7.90553	8.51144	11.4216	7.41872	4.70235	1.04863	3.34509	6.96232	1.0511	4.4733
1.76489	6.7258	9.58115	4.49758	1.26216	6.16348	4.68536	9.3116	8.52861	3.97594	3.86277	7.34248	7.12867	7.37419	6.65827	11.2431	7.09241	5.06159	0.510839	3.11343	6.4083	0.921249	5.70493
2.04256	7.05521	9.27928	5.10384	2.54779	8.61847	4.58666	12.1865	9.02812	3.51442	5.9872	7.27999	8.80795	11.2338	10.5242	11.4244	7.63328	4.99356	2.08394	0.715011	6.94475	6.17366	4.39263
2.43821	6.80705	9.40396	5.63215	2.8467	6.96812	4.11158	10.7165	8.62077	2.93274	4.80253	6.31243	7.59082	9.43104	7.0023	10.5106	8.5703	5.12097	0.595249	3.39411	6.888	10.7407	5.52226
3.8035	7.2572	8.84555	5.5957	4.38552	5.71653	4.93996	9.23358	8.94334	3.90955	4.9513	6.2765	8.36796	8.95618	6.89852	11.0697	8.05741	5.34595	0.311993	2.54459	6.72436	0.510174	5.21348
1.82922	6.16438	9.221	5.1892	5.19232	6.49043	3.71095	10.6451	7.60782	3.88408	4.95079	6.65276	7.86044	8.35539	9.34553	12.5715	7.34001	4.70165	1.63501	2.32833	6.79845	4.88572	5.2955
2.06505	7.22127	10.212	4.25488	1.48764	5.46488	5.06157	9.66572	7.82502	3.26607	6.28422	5.92763	6.77867	9.77822	7.58148	11.3816	8.71454	3.77381	0.554576	2.59079	6.63747	1.21252	5.28578
1.86194	7.54905	9.37557	5.34389	7.20776	8.69614	3.06498	9.93377	8.55279	4.19025	5.32094	7.34508	7.78092	9.61395	9.46734	10.7048	7.78876	5.13196	1.17551	3.36847	7.09574	3.65796	5.69319
1.65711	6.52573	8.98928	4.87767	3.18848	7.64171	6.07469	10.8487	8.30365	3.35955	5.45885	6.31735	8.21859	10.158	10.0642	10.8667	7.84311	4.66286	0.921916	3.0697	6.57863	6.15067	5.81816
1.54537	6.89713	9.09863	4.90627	4.85375	6.24372	2.80387	8.40317	8.35333	4.19264	6.39976	5.13606	7.55359	8.5395	7.29253	11.9132	7.97589	4.59152	0.670002	0.902041	6.00188	0	6.99896
2.44357	5.78344	9.2809	5.07502	2.56271	7.17125	3.14137	11.5087	8.53059	2.74627	3.52515	6.27757	7.80999	7.7826	7.23374	11.4523	7.06322	4.44038	0.481581	1.45275	6.74168	1.61342	4.3185
1.25311	7.51697	9.39748	5.20508	5.06219	7.9024	2.3172	10.637	7.30193	3.45945	5.44385	7.82154	8.78478	9.10586	8.39685	11.4454	7.89175	4.59448	0.679198	2.07246	7.08838	2.55188	5.09115
1.97629	7.43046	10.1541	5.29775	5.81622	7.63385	2.67589	12.1391	8.11098	3.41638	4.99141	6.90312	8.34013	8.91311	9.7112	11.1052	7.27174	4.76516	1.84936	3.07841	6.75599	1.12938	5.40856
2.81871	6.82602	10.1848	5.63907	1.63281	7.325	11.8819	9.38497	7.61408	4.23228	4.55171	8.24272	5.8928	8.94375	7.67015	10.6636	6.86152	3.72391	0.695676	1.42393	6.88306	1.53217	5.25053
0.762915	7.05286	8.67863	4.82532	4.05897	5.19273	4.11116	10.6344	7.44342	1.81181	5.2242	5.3497	7.15696	9.37198	6.96146	12.5559	6.75489	2.78145	0	2.37575	4.8367	0	5.4361
2.17318	7.09749	9.15831	5.42741	5.77085	6.50991	3.10651	7.54204	8.0467	3.21634	4.83157	5.09945	7.87687	9.58415	6.81453	12.1352	6.66708	3.90333	0.105356	3.31561	7.06287	0.0649947	5.39034
1.48426	6.54377	9.14549	4.54664	5.6518	6.86561	2.81593	11.3335	8.39558	2.20166	4.47763	5.19397	8.69061	8.23907	7.01964	10.4286	5.7742	3.3548	0.213601	1.63729	5.41719	2.5696	3.19765
1.87638	7.02298	9.65166	4.78531	5.42039	7.13685	1.86996	12.3443	7.65873	2.89363	4.82292	7.49488	8.14742	10.3593	8.8985	10.8648	6.61328	2.96637	0.381042	3.17123	7.00303	2.3865	3.82849
2.21927	6.99042	9.37018	4.84141	5.34006	8.92825	4.53729	12.2367	8.21634	2.49977	4.78795	6.69312	9.00254	11.1835	7.56148	10.7357	7.05389	4.50365	0.266784	1.15572	6.60226	4.86257	3.8272
2.47655	7.50249	10.5051	5.52484	6.90331	7.34182	3.81616	12.2878	9.31832	3.20035	4.47351	7.01759	8.52738	9.24644	9.31465	11.288	5.75898	4.34503	1.41632	2.45533	6.35109	0.0853048	4.02766
1.48877	7.81157	11.0356	5.5065	6.29085	5.63173	4.46957	9.50816	7.75955	3.39402	4.35313	6.63154	7.69513	10.4881	7.47401	11.989	6.10256	2.88064	0.433598	3.15184	6.2735	1.41984	4.81672
2.10083	7.84983	9.07472	5.22308	8.42044	7.21594	2.23309	11.0905	8.02879	2.93643	4.37745	7.29061	9.10326	9.45352	7.98466	10.8921	6.78921	4.52596	0.82393	0.895918	6.01087	0.165379	3.61811
2.24925	7.13175	9.02629	4.99272	4.8648	6.19688	1.09974	8.50706	8.54464	3.50889	4.5464	4.27176	8.05276	10.3155	6.64389	12.1201	6.80891	2.24426	0.186537	0.597884	6.06332	0.505671	5.24704
1.87025	7.54243	9.25555	7.65786	5.04072	9.0492	2.10718	10.667	8.57062	4.0026	5.034	8.55105	8.33249	8.94341	10.6914	11.6208	6.07419	4.67001	1.74223	1.22935	6.76135	1.73667	4.61901
1.87975	6.59801	8.55859	4.92531	3.97304	7.60159	2.02963	12.4149	6.91344	3.04255	4.64683	5.95892	8.14735	11.0071	7.64746	11.5207	6.9477	2.85274	0.211002	3.55573	6.26374	0.0734801	3.5691
2.31119	6.95981	9.47848	4.48405	6.55091	8.70462	2.56216	10.8631	8.94575	3.71278	4.22404	6.46556	8.46896	9.13451	9.53648	10.4189	7.24317	4.93734	1.76631	2.05531	7.2833	1.94013	5.21887
2.08797	7.69155	8.63889	5.29853	0.421182	5.55085	5.53778	11.8122	8.41889	3.07058	4.06406	6.0078	9.53608	7.25431	7.72649	10.8846	7.15531	4.72529	1.19334	1.38285	6.85617	4.26689	3.30624
2.14156	7.76951	8.86842	4.79878	5.1213	7.01714	2.38092	10.9801	8.38189	2.34018	4.94777	6.27868	8.02912	9.08049	7.39736	10.7281	7.66177	4.33571	0.627113	3.69847	6.00913	3.97673	5.38124
2.41247	5.90617	9.20311	5.11931	4.14053	8.08618	5.99072	8.87207	8.65263	4.18048	5.15421	6.22609	8.25112	7.20947	6.89885	12.2865	6.84968	5.14273	2.71809	7.49109	7.2872	2.55384	5.96688
1.74996	6.70821	9.03253	5.1152	1.67167	8.4491	4.06318	11.8149	8.0126	3.10861	5.19745	7.97948	7.58874	11.0196	8.63147	11.23	7.68665	4.95585	1.17149	2.22581	6.70358	3.52319	4.95115
1.52046	7.28721	8.09171	4.54482	2.78348	5.80609	4.29852	9.65072	8.60693	1.93483	5.51175	5.64626	6.20744	9.47929	6.81092	11.7531	7.37216	2.94318	0.566213	3.75826	4.65063	3.11203	5.90451
1.41402	7.55225	9.90121	4.48629	4.89733	6.9141	5.08184	10.9464	8.50809	2.62915	4.58966	6.43608	7.94085	8.06281	8.7526	10.9613	7.09485	4.29762	0.940163	3.89031	6.46015	1.26544	4.50109
2.37921	6.83802	9.19384	5.1913	0.833758	6.1594	4.33799	10.04	9.21106	3.88435	5.59849	7.41476	7.67859	8.14932	6.60841	11.4523	7.23319	3.92813	1.84481	2.88346	6.99434	0.745405	5.21951
1.87508	8.01282	9.15039	4.74277	6.94583	7.66754	4.89207	11.1971	9.73802	3.14402	4.72536	7.47314	8.5718	9.95143	10.9922	10.7764	7.06967	3.92322	1.2355	2.79609	5.45335	0.677387	4.81451
2.11609	8.46848	9.02963	5.75249	2.17891	7.74739	6.80376	11.6857	9.0638	3.21417	5.47504	7.55212	7.65066	9.89551	7.2458	11.842	8.7525	4.6036	0.985918	3.625	5.9688	1.70104	5.64225
0.69997	6.86769	9.65979	5.14013	3.71358	8.49263	5.46138	9.9828	7.94496	3.58303	4.22496	7.85884	6.93974	9.66387	8.4506	10.8524	6.5396	4.28369	1.75762	2.35728	7.1898	8.11107	5.7483
1.47235	7.86176	10.1887	5.59916	1.01183	6.14844	3.09142	10.2925	7.69995	2.76563	4.69334	6.29749	7.84505	8.71447	7.74729	11.8184	7.47701	4.50962	0.734884	3.19311	7.29565	0.751689	5.98855
2.38733	7.73908	10.3531	4.98456	2.47792	7.59045	3.61336	10.8085	8.93106	3.42851	4.47945	7.78076	8.00893	9.03054	9.72492	10.7735	6.25089	4.15054	1.58993	4.91658	7.21224	1.49774	4.63616
1.56338	7.43388	9.54277	4.6499	3.23251	9.50296	5.1755	12.2092	8.40726	3.58872	3.64585	7.15432	7.349	7.80147	9.32548	11.1809	7.35628	4.8001	2.45573	1.9865	7.1948	1.62041	5.55693
2.35906	6.74154	10.3692	5.47795	3.46112	7.60412	4.00927	11.7877	8.28396	3.31084	4.37388	6.57466	8.22267	8.79295	6.5797	10.8477	7.51329	5.46977	0.845735	3.05555	6.69392	5.15489	5.39703
1.82215	7.8883	8.65934	5.30208	4.29628	8.72566	6.14878	11.2895	8.48079	2.85675	4.53189	6.64863	8.32971	9.48787	6.30307	11.2868	7.56863	5.22261	1.0804	3.0116	6.70214	7.54158	5.62465
2.42538	6.45236	9.16749	5.55168	5.98733	7.98566	2.95532	10.9072	7.83382	2.96472	3.80354	6.29167	7.95608	8.62191	7.69921	10.8265	6.44792	3.72309	2.20293	1.59606	6.48824	1.51977	4.54067
1.272	6.68213	9.05563	5.09462	1.50543	6.13069	2.52255	5.92161	7.94284	2.56073	4.43148	7.05334	6.90717	10.132	6.96619	11.8318	6.22853	2.72241	0.193156	3.63702	5.77713	0.120537	3.768
0.89465	7.64754	9.03143	5.13679	1.56577	6.23266	4.45031	10.8831	8.40565	2.88385	6.43491	5.94266	6.41564	8.99921	8.91861	11.6699	7.58383	3.12835	0.680821	2.33613	5.62646	0.854775	5.02237
2.52512	8.48313	10.1297	5.04146	4.24419	6.3651	5.15696	10.063	7.39538	2.62974	5.69944	5.90922	8.3542	8.7429	7.90998	12.0879	8.37006	3.44518	0.682054	4.32419	6.16569	1.56856	5.20801
2.33919	8.76712	10.4092	4.72813	4.0841	6.81329	6.33853	9.4324	8.6991	3.45019	6.79953	5.97574	8.00865	10.3504	8.73548	10.6464	7.53671	4.9791	0.2376	2.11793	5.74546	0.698006	5.65809
2.29893	6.3629	8.27002	5.02319	0.257267	5.61757	4.7856	9.8397	9.22967	1.34488	5.74743	5.69872	5.66985	7.62508	3.59283	11.0996	7.88158	3.05338	2.73191	0.389076	6.29659	0.155591	5.63304
1.63918	5.35022	8.32597	3.45243	1.7846	5.514	7.81835	7.66603	8.69406	3.49733	4.8525	5.47358	5.44528	9.31959	6.05708	12.3418	7.32569	2.49888	0.159871	3.83811	4.65291	0.361901	6.08618
2.2446	5.93894	9.47081	5.61777	5.08661	5.42722	6.17251	8.95873	7.601	2.83046	5.2326	5.03618	9.11282	9.91581	6.38982	12.3147	6.96754	3.59572	0.497614	1.02887	5.82516	0.134125	5.11807
1.67838	7.67619	9.15792	5.44816	4.657	7.23316	5.06007	10.0191	8.49797	3.14938	5.2948	8.64505	8.07913	10.8718	8.89699	12.2157	7.38182	3.37255	0.804571	1.39254	5.75	1.14472	5.10433
1.54277	6.25249	8.03049	3.90045	1.80435	5.01082	6.93618	9.32111	9.0022	3.12429	5.00238	7.09771	6.02913	7.83685	7.57267	12.7443	6.97231	2.44648	0.283238	1.53547	5.21533	0.107841	5.82858
1.85863	6.72898	9.27619	4.27169	6.07589	5.91056	6.44225	9.94957	8.45367	3.49214	5.40155	6.25868	10.5832	9.30226	6.9176	10.8444	7.483	3.64932	0.568709	2.35651	6.66894	0.211269	6.26279
2.63945	4.73802	9.44583	4.66855	4.08565	5.1121	3.79363	8.62159	8.11788	3.94262	4.928	6.85259	8.12607	7.79925	7.00516	11.6454	6.01418	3.55865	0.450345	4.4338	6.48622	1.84297	4.4405
1.73193	7.12245	10.9665	5.12485	5.46802	7.94739	2.48612	11.9538	7.74994	3.74463	5.0015	6.96564	8.10071	10.3827	8.85793	11.0117	6.16185	4.68147	1.49236	0.496799	6.66669	1.36929	3.97087
2.17616	8.34502	9.87017	5.59451	3.53375	6.67236	5.31607	11.0546	8.83589	3.23555	4.4545	6.59681	7.46953	9.51917	7.20254	11.2622	7.20081	3.74319	0.674834	2.48841	6.50094	0.636754	4.28893
3.79361	5.97531	9.12336	5.33112	4.11903	8.0927	5.39877	10.7038	7.29307	3.27989	4.0196	6.19968	7.36679	8.19312	6.39351	11.3865	6.81773	2.8969	1.53132	1.55732	6.69721	4.19462	3.87492
1.46632	5.59268	9.87913	5.16404	5.96695	6.10816	5.79577	9.43221	9.18834	3.23964	4.83286	6.22096	7.50825	8.69588	6.12082	12.1094	7.24126	3.61084	2.11078	5.69197	7.50473	1.62009	6.23442
1.39712	5.73226	9.90162	5.55996	7.12061	9.31139	1.97519	11.8656	9.1278	3.15166	5.09065	6.83752	8.66284	9.67537	9.18121	11.582	7.53377	5.29857	0.722876	1.83956	7.05762	1.71947	5.38388
2.20919	7.85995	9.23955	5.3284	3.96191	8.21517	3.96836	10.8546	8.3342	3.12837	4.31638	5.96277	7.80237	10.0136	8.17921	11.7755	7.20625	4.55031	1.90151	4.19916	6.84719	2.70429	4.69199
1.45727	7.40087	9.77789	4.57381	5.28577	8.08527	4.68342	9.26822	8.46375	3.27747	4.5453	6.72505	8.18455	8.11243	10.5385	10.896	7.08821	4.19707	1.96582	2.2275	6.3385	2.91898	4.97834
1.71616	6.88846	9.29725	4.68644	4.94208	6.1376	2.32193	9.34321	7.57379	2.50231	4.0689	6.31682	7.6227	8.90704	5.8044	10.4077	6.81105	3.67669	0.337359	2.66629	6.02908	2.17232	5.31919
1.56415	7.86829	8.60081	4.54633	1.16858	7.75589	5.19238	11.6553	8.23277	2.53045	5.40874	6.44623	7.8217	10.2906	8.63807	11.5676	7.73017	4.15941	0.240814	1.86172	6.70465	3.84775	4.20041
1.95115	5.97852	9.26106	4.70202	5.20747	7.84182	3.0982	11.7903	8.44152	2.9779	4.2164	6.70299	8.78135	8.4738	8.51025	11.6498	7.13294	3.25796	0.852642	2.34396	6.35787	4.80161	4.48807
1.75252	7.32372	9.07883	5.43762	6.96817	6.75498	6.86805	11.163	8.50385	2.12936	5.41842	5.11705	8.08464	9.41709	5.98453	12.028	8.14981	4.93094	0.315771	2.26498	6.23812	3.711	5.89717
1.82481	7.4622	9.44336	5.58456	3.56592	7.42645	5.46186	11.4035	8.67493	4.00838	4.40828	6.53269	8.97226	8.23145	6.81666	11.8336	7.72883	5.78789	0.560379	2.20543	6.10724	3.63404	4.66106
1.55567	7.0178	9.398	4.49249	1.83184	6.16574	4.26821	9.92038	8.60662	2.85159	4.44139	7.0979	6.30209	8.57331	6.58624	10.3174	7.18066	3.88291	0.258896	2.63856	6.15195	0.377291	5.15541
2.54058	7.91961	9.47051	5.08841	2.07129	7.43977	3.92925	10.9625	8.52732	2.93291	4.6941	6.55773	7.48533	9.33172	8.18813	11.3417	7.29094	4.32224	1.59857	3.73698	6.32486	5.16193	5.08552
2.366	6.47394	9.4605	6.62904	5.89253	5.38251	3.99654	8.85597	8.02631	3.16079	4.89605	8.15809	9.41047	9.63482	6.45838	11.3702	7.75116	4.38812	0.293742	5.79392	6.62362	0.297394	4.37261
1.90389	7.46544	8.30272	4.88209	0.477728	6.6138	4.29853	10.8258	8.11946	2.75582	4.86268	5.95174	7.15929	10.1547	6.00176	11.9825	6.99766	4.12543	2.57349	2.21436	7.34972	1.40591	8.40701
1.82832	7.0345	9.46409	4.94433	5.73463	8.47263	2.63647	12.3998	8.92673	3.1203	4.86605	7.9441	8.57257	8.65587	8.37297	11.3975	6.61234	4.75109	0.809711	1.96352	6.69713	5.94447	4.06503
1.33625	6.35232	9.12129	5.37221	6.01783	8.56523	3.55923	10.5806	8.94227	3.3181	4.90885	6.80685	8.46797	7.82221	7.72184	11.7679	7.72024	3.02819	1.61498	3.50638	5.80095	0.305926	4.35358
1.78579	7.86294	10.1757	5.27487	2.52172	7.00221	3.84249	11.1999	9.44491	2.4233	4.77788	6.88653	8.51611	9.31075	5.51807	11.9229	7.81768	4.26747	0.443135	5.54465	6.37314	2.75684	6.54875
3.12011	6.59538	9.61381	5.11472	1.97566	6.67011	2.12402	8.91723	7.70353	4.62749	4.24958	6.73697	8.27262	9.10663	9.07296	10.8719	8.13675	4.87134	0.139334	6.9665	6.05768	0.335847	4.74882
1.34764	5.93043	8.64989	4.2274	1.08864	5.41843	3.42413	10.9253	8.95572	1.82688	3.74061	5.86288	7.60337	8.56908	5.17944	10.8384	6.04454	2.53322	0.11203	3.10417	5.07377	0.0915135	4.7405
2.11874	6.46212	9.1773	5.26931	5.43441	5.12774	3.41023	8.75344	8.42557	4.53678	3.81413	6.05962	9.02212	9.08957	7.88548	11.5616	6.11186	4.07869	0.525205	3.56938	6.78852	2.60642	4.30482
2.01274	7.06176	10.2079	5.02227	2.93604	6.67631	5.39366	9.4459	8.99154	2.63208	4.46779	5.50253	7.6643	9.88283	7.29111	11.5809	7.26099	3.86143	1.43679	7.87739	6.76092	0.484794	6.40303
2.14526	7.38816	9.53144	5.22279	4.01306	9.22828	4.18439	10.9047	8.34156	4.14538	4.51117	6.62566	7.23278	9.01123	8.69307	11.5667	7.25384	6.13224	2.26315	3.38809	6.62515	1.26392	5.24384
2.73464	6.88983	9.00949	5.46238	1.85529	6.68221	4.7662	10.4338	8.31457	3.19551	4.07495	6.17182	7.51757	10.673	8.72328	11.1575	6.60021	4.29845	0.160961	2.12107	5.48534	3.53127	5.87431
3.07581	6.34113	9.89834	5.14961	2.10568	5.91019	2.48563	9.69436	7.96868	2.69711	4.21871	7.1136	7.58294	8.06471	6.85588	10.5808	7.78246	5.31312	1.26415	3.21329	6.51868	1.79931	5.41347
1.96917	8.36598	10.3917	5.56453	2.36514	6.99291	6.10145	10.7158	8.6138	4.09272	4.90773	7.33083	9.24469	9.88824	7.64654	11.2247	7.23048	3.88023	0.713248	1.64905	7.21613	0.89323	4.20599
2.71391	8.20411	8.96394	5.84652	4.48292	7.83638	4.02735	11.4526	7.23921	4.61687	4.5805	8.67782	9.10566	7.92452	9.45444	11.4628	7.63409	4.25326	2.22399	2.21173	6.92889	2.94133	6.16734
1.37869	8.72284	9.70106	4.04488	4.33792	5.5029	3.98146	10.8558	8.21628	2.98683	4.54379	5.53432	7.68181	8.89431	8.03387	10.1292	7.05335	4.49654	0.36129	4.8317	6.04389	0.299586	5.58783
2.18834	7.45309	9.66804	4.67022	6.48191	8.44832	3.99294	10.9173	8.12711	3.36311	3.86516	6.99332	7.48718	8.34971	9.64475	11.7836	6.7408	4.74168	1.53293	3.12524	6.96414	1.80757	5.16606
1.34458	9.766	8.87339	3.70887	2.17017	6.33679	2.31181	10.1819	7.00612	2.89906	3.9284	6.62812	7.46933	8.10936	7.71219	10.6974	6.95283	3.73467	0.534891	4.82385	6.42058	0.101383	4.6907
1.1445	7.33772	8.80644	4.43878	3.76406	6.83474	3.1826	11.1866	7.76365	2.4553	4.14444	5.41031	7.429	7.97198	8.02627	10.8869	6.28496	3.76554	0.781956	2.40451	5.95683	1.57909	4.47084
3.19926	6.5677	8.59744	5.29737	3.47128	6.67033	3.09249	9.33884	8.38331	3.67681	4.79539	5.99215	8.03108	8.51336	7.0154	11.5667	7.47912	3.6373	1.11145	2.29572	7.23864	0.454838	4.95925
1.00801	8.11436	10.2271	4.94215	4.39682	6.86105	4.6966	12.1931	8.33115	2.93083	4.82924	5.18511	7.62551	7.62238	9.28681	12.6079	7.01312	5.13637	2.12778	2.1175	6.42429	0.108689	3.52624
3.14456	6.93825	9.78671	5.09975	0.969695	6.64325	6.5074	10.0966	8.44726	4.75634	4.09187	8.02488	6.97885	9.04142	8.1747	9.87627	6.66007	4.17506	0.781823	1.9178	6.83314	2.23615	4.92431
3.4266	7.55021	9.56864	4.69146	2.35572	6.41132	4.90104	10.299	7.60887	3.10705	4.63299	5.95465	7.31901	8.72431	9.42859	10.0648	7.56882	5.41655	1.61436	3.81921	6.55934	1.12966	5.26323
2.60114	6.24404	8.80724	4.96859	2.33042	7.09952	4.12014	10.8955	8.38222	3.63513	5.64669	7.03817	7.43715	8.36808	8.47773	11.7952	7.63392	6.14724	2.20206	2.19306	7.4299	0.145622	4.83158
1.83284	6.70529	9.64099	5.45114	2.98011	7.91161	4.99695	10.0619	7.63987	3.93826	4.68269	6.54584	7.40693	9.34027	7.70943	11.4844	7.71019	5.01665	1.54741	4.61615	7.42132	1.51949	5.64542
2.07477	7.781	9.30822	6.30223	7.3051	9.51128	2.07587	11.9376	8.18947	3.87135	4.99055	7.30955	8.81471	8.13587	8.16874	12.4272	6.81773	5.44331	0.31347	2.04144	6.95894	4.82673	5.22811
2.55226	6.01504	9.52021	5.35602	6.23859	7.85746	3.32437	10.6202	7.89325	4.25094	5.05616	6.66323	7.72378	9.13474	9.10361	11.0772	7.38231	5.57889	0.855243	2.82662	6.26549	0.327885	5.19305
1.8227	7.69794	8.53508	4.54378	1.35498	5.81407	3.63917	9.65881	7.30965	3.01054	3.57258	5.36799	7.06408	10.4371	6.69256	10.6754	6.12644	3.29185	0.411294	2.00812	5.18878	4.04879	4.05525
2.11156	6.47387	9.77492	5.91257	3.3986	7.25455	4.03737	11.2497	7.90221	3.28769	5.07653	6.88868	8.04973	9.67452	6.58719	11.7049	7.51836	6.30943	0.520481	2.18276	5.85558	6.25487	4.82845
2.27821	7.55475	10.1515	4.98784	5.45447	8.40521	3.37301	9.47523	8.06271	3.68267	4.62373	7.29257	8.29691	9.2525	8.31802	11.2651	7.40874	4.14605	1.12981	3.73472	6.4791	1.32389	5.52361
1.78213	7.1434	9.12864	4.96563	1.1728	6.70954	4.64413	9.23725	7.63334	1.79888	4.89988	5.6078	6.99763	8.88898	5.59612	10.9923	8.18514	4.2328	0.297277	4.48483	5.84448	1.99145	6.16084
2.08494	7.78525	9.53704	5.10639	1.6352	6.65009	3.77454	9.73559	7.92115	2.65976	4.81973	5.84073	7.0778	9.19977	7.10832	10.9295	8.11664	5.17666	0.271775	4.48035	6.31257	0.96025	5.83627
2.09567	6.81236	9.74155	5.32751	6.31899	7.34824	3.6937	11.1776	9.40052	4.71204	5.37964	7.18049	8.8372	8.97628	8.55956	11.417	7.56068	4.98316	2.08309	2.99048	7.2773	4.74341	5.2436
1.55012	6.70348	10.0775	4.23356	4.85333	6.28557	4.47151	10.4912	8.30267	2.83228	6.754	6.27589	6.72712	7.97567	6.59547	11.6619	8.16899	4.37267	0.543732	4.09353	6.95727	2.0455	6.36617
1.97502	7.55692	9.80568	5.12135	6.36758	6.41397	2.60354	11.6654	8.18081	3.01222	4.18568	6.06147	9.40754	8.85541	9.08828	10.2702	6.17365	4.47164	0.154548	2.31498	6.26598	0.0131696	5.23909
0.71655	8.40189	8.77042	5.32227	2.50596	6.9553	4.28595	9.71934	8.94908	3.46457	4.11004	6.98249	8.02571	8.72395	7.26551	11.7836	6.89193	4.31766	0.905814	1.72594	7.3486	3.74857	6.21739
1.78514	8.00569	10.1779	4.99401	6.23045	7.66221	3.93421	11.1434	8.25531	3.54013	4.44579	7.81723	8.6149	9.20061	7.20665	10.6327	8.16767	4.63228	0.567541	3.08348	6.62843	2.93263	5.76469
2.41784	5.9417	9.14217	5.54455	7.15104	8.52548	2.47018	10.2894	8.5254	3.66553	4.63017	6.75902	8.13841	8.38877	10.4926	12.6778	6.91351	4.02912	1.96804	1.59338	7.05146	0.478876	4.73651
2.04551	7.32931	9.49204	5.30254	5.95324	7.14231	2.61078	11.1097	8.19049	3.93125	4.26741	7.02237	7.79908	9.35409	10.1227	10.7149	7.12137	5.364	1.15553	0.923914	6.70604	2.0641	5.49553
2.36974	7.02404	9.98526	5.15315	5.91309	8.253	2.49166	10.912	7.95317	3.59068	4.43668	6.67	9.06913	9.13352	11.1736	10.592	6.85679	4.89772	1.00551	1.991	6.9188	2.98642	5.48516
1.99293	7.94599	9.19926	5.43659	7.17528	7.39995	4.83027	10.5651	8.14986	3.26868	4.48924	6.78736	8.31733	9.72589	8.84861	11.1153	7.06007	4.55795	0.797509	4.34609	6.49249	4.43113	6.17131
2.591	7.2781	9.26082	5.04276	1.86214	5.8697	3.51454	7.90585	7.59971	4.84211	4.69628	6.86122	7.36027	8.74429	8.67214	11.425	7.12848	4.41034	0.959301	4.0043	7.21009	1.81558	5.30355
1.75037	8.61298	9.38789	6.86202	4.54693	6.6011	4.14359	12.3579	8.23172	4.23484	4.91728	7.26994	8.11487	9.38667	8.05502	13.7452	7.24094	4.66463	0.165153	1.96634	6.5457	0.0211306	4.84099
1.86875	8.36241	9.67751	5.66487	5.39216	7.03792	4.88017	11.841	7.85713	3.42495	4.68848	7.18081	6.97199	9.125	7.01814	12.1714	7.57756	5.04742	0.192571	4.13478	6.61425	2.44473	5.63588
2.47906	6.73284	10.1561	5.81662	4.46142	6.14562	4.39953	9.6907	8.94632	4.35129	4.62533	6.27323	7.51517	8.98975	7.11867	12.0845	7.85139	3.65895	0.17347	5.62152	7.12605	0.232488	5.44315
2.82443	7.31619	10.3286	5.91726	4.62065	8.43452	1.96158	10.5092	8.20905	3.75963	4.60834	6.72642	8.84465	10.6727	7.78663	11.9575	7.23731	4.48884	0.391006	1.40737	7.06112	6.69585	5.79334
1.45625	7.47315	9.36809	5.21712	7.26307	7.22947	3.00248	10.7953	7.78146	2.87684	4.40074	6.25081	7.66747	9.04768	6.81007	10.5198	7.48281	4.29647	0.0788941	3.98058	6.46649	2.28397	4.79167
2.43157	8.22682	8.9493	5.97008	4.281	8.08661	2.44811	11.5896	7.80321	2.49694	4.06904	6.37667	8.38891	9.48298	7.36659	11.3693	7.09027	4.62527	0.778923	4.35253	6.18254	0.68835	5.02895
3.29503	7.70617	9.67856	4.97908	2.12248	6.48608	4.24496	9.07288	7.8738	3.65689	4.32777	6.85063	8.32531	8.97084	8.18124	10.8759	7.7732	4.56929	0.341542	3.36322	6.64714	0.273684	5.6664
2.3346	7.04366	9.84268	4.83313	1.11453	5.90586	5.29828	9.09328	8.70619	3.52881	4.28667	6.31265	7.18492	9.50419	7.66149	11.9088	6.86737	4.11122	1.78873	3.89773	6.69623	1.09786	4.42503
1.72519	8.1121	8.91938	5.05853	4.79853	8.86459	4.41562	11.8175	7.80404	3.65616	3.67019	6.35264	7.81917	9.73837	6.22406	10.7963	7.65413	3.72442	1.36842	4.19679	6.78198	4.53132	4.60258
1.73762	7.39729	9.87468	5.61327	4.03339	7.70833	3.26445	10.5317	8.27586	3.42733	4.77475	5.92951	8.00006	9.08761	7.15611	11.8062	8.10096	5.37167	0.662702	3.36826	7.25566	3.78142	7.04269
2.67491	6.95726	9.68777	5.24686	6.98957	8.13125	2.22679	7.93246	7.41316	4.01758	4.28892	6.57969	8.90986	7.83707	11.4196	10.1999	6.63632	4.42847	0.313159	0.7361	6.92868	1.15172	4.5815
1.54731	7.27764	9.32945	5.05824	7.28177	8.27093	2.6591	11.8653	8.29576	3.18788	5.14642	5.99133	7.61919	8.97882	9.77114	11.6368	7.93098	4.04904	0.485393	3.86364	6.27133	0.405313	3.57766
2.40483	7.09251	9.08974	5.51484	2.46787	7.96724	6.24747	10.2819	7.51894	3.13155	4.3752	6.57256	8.45558	10.1621	8.75464	11.5577	5.91918	3.46827	0.592507	2.03173	6.83986	2.18898	4.34531
1.94597	8.50072	9.29701	6.12407	6.59026	8.66762	4.01192	10.8594	7.94104	3.52507	4.53508	6.50787	8.28941	10.2212	9.04592	11.0723	7.40483	4.4662	0.682669	1.62038	7.11095	2.23998	5.3471
2.42574	6.56925	9.60157	4.64225	5.97902	7.19683	2.67481	10.6441	8.67771	3.7426	3.89013	6.67728	8.10666	9.43818	9.05564	10.3053	6.19178	4.38431	2.14206	2.42724	7.23999	0.488968	4.90149
1.04365	7.59637	9.23594	5.29342	1.04296	7.3569	6.09413	11.9663	8.13769	2.1897	4.76141	6.76229	7.19316	10.1528	6.08197	11.1716	7.38556	4.49175	0.266647	4.1794	5.89622	6.78987	5.94079
1.47881	8.60868	9.19602	6.3876	4.41462	6.8497	3.84873	12.5935	7.66373	2.30557	4.24001	6.63279	6.38129	9.91301	6.88139	10.8803	7.99844	5.86604	0.190714	6.31432	5.80754	2.42243	5.0359
2.43013	6.07042	9.93055	5.10695	5.43194	8.05865	2.85954	11.801	9.13537	3.96357	4.15195	7.5906	8.8896	9.8906	10.0816	11.1166	7.69832	4.26277	1.84975	0.639885	7.07618	3.15715	4.22489
2.35262	7.21252	9.18664	5.63762	2.62429	8.69207	4.0629	11.9406	8.5792	3.79886	4.90962	6.80484	7.6561	10.7676	8.97732	10.617	7.19222	4.4969	0.721089	1.98668	7.20349	6.02973	4.52272
2.62537	6.37667	9.21955	4.91005	0.576498	5.74396	9.89483	9.65521	7.47133	4.24965	4.66916	6.60091	7.58567	8.99787	7.77811	10.8855	7.13504	4.63755	1.7282	3.38379	6.68062	2.68849	5.66734
1.24059	6.08826	9.63991	4.72144	1.18531	6.27198	4.59553	11.524	8.92899	3.45021	5.38564	5.09646	7.37332	9.82356	7.04915	11.6715	7.40459	4.19503	0.968398	4.24768	7.03632	0.945821	5.65906
2.19515	8.11326	8.79319	5.50683	1.36773	6.84989	5.20752	12.6	8.08426	3.07022	4.72497	7.17135	7.44901	10.3115	6.90108	11.7157	6.98598	4.67198	0.223229	1.19875	5.78582	4.5028	4.77491
2.44019	8.17317	9.43648	4.82815	5.52532	6.44539	3.43124	10.6091	8.81726	3.05925	3.91421	7.9181	8.1411	8.49172	8.03935	11.63	5.97527	3.57382	0.826322	2.6009	6.80702	1.57186	4.15171
2.75684	6.52504	9.48618	5.24727	2.65498	6.33796	4.24567	10.0238	9.2987	3.67681	5.75022	7.18	7.23699	7.80434	7.59436	10.9762	7.2316	3.68929	1.93769	1.75205	7.14177	0.141575	4.68723
1.45778	7.73674	9.59052	5.37027	5.0783	8.90838	4.24139	11.3648	7.79321	2.79556	3.55931	6.84481	8.76634	9.66498	7.41929	10.7142	6.80389	3.95903	1.03541	2.71235	6.59081	2.89811	4.74538
2.583	6.85537	9.69001	5.13328	1.82195	7.26135	3.51938	11.0272	9.06214	2.71462	4.27552	6.62995	7.47238	9.50287	6.09685	10.0047	6.90342	3.9319	0.352828	3.30344	5.96921	0.278427	5.42029
1.76001	7.49886	9.11068	4.76675	2.6051	6.37949	5.34974	10.5811	7.73534	2.7835	4.18551	6.55007	7.58439	10.6408	7.84619	10.9484	6.79719	4.16801	0.175585	2.80932	6.31382	3.18719	5.44328
1.01212	6.63414	9.3553	5.38776	5.3305	7.70813	2.45992	11.7067	8.19942	3.85096	5.62699	6.89776	7.86616	9.04944	7.86926	11.7086	7.63612	5.96812	0.655852	2.3903	6.80357	8.03622	5.17491
1.77216	8.78223	9.40569	5.41387	3.43105	6.38977	6.68164	12.3321	8.5298	1.47939	4.49376	4.90552	7.73523	8.25154	6.0574	11.0446	7.62945	4.26272	1.1514	3.8968	6.16156	0.268178	3.95383
1.78517	8.58723	8.24422	5.03285	1.15909	6.59762	2.27977	9.29808	8.63463	1.84257	4.06643	6.83977	6.16109	9.9619	6.97877	10.3819	7.43959	4.19796	0.458152	4.49137	5.83729	5.72706	6.17286
2.72584	8.17065	7.83107	5.04185	1.18232	6.32016	2.41497	11.5821	7.79152	1.89698	3.78696	5.91665	6.23428	7.32865	5.67057	11.2876	7.45045	4.52816	1.05437	4.41338	6.08685	3.60237	3.92007
1.89501	7.67084	9.12488	5.19216	1.95044	6.57116	5.01542	10.6499	8.10375	3.34008	4.2381	7.40868	7.28784	9.00107	6.97724	10.2282	7.48374	5.0428	0.796596	3.52638	6.53163	1.14507	5.27473
2.53062	8.31118	9.95581	5.17517	2.35192	7.16483	3.12472	11.2875	9.20253	2.36079	4.51102	6.10447	8.23157	8.3622	7.80666	10.8411	7.5115	4.86057	0.653715	4.52994	6.40993	3.28664	5.02548
3.10468	7.90332	9.63985	5.32754	1.64408	7.5765	4.8425	10.0764	8.39793	2.75836	3.99492	6.23413	7.62459	10.0414	8.09911	10.1891	6.88336	4.8605	0.621156	4.2404	6.2384	2.43269	5.67062
2.19306	7.63582	9.60132	4.4449	5.14588	7.03402	3.93828	10.3481	8.54911	2.93935	4.60887	6.13554	8.42625	8.91789	9.8125	11.1514	6.73891	5.56495	1.07707	2.68497	6.44829	2.7216	4.89747
1.69521	7.26982	8.81025	5.51524	1.15991	6.51736	5.92165	10.9033	8.61871	2.73915	5.17324	5.97689	8.37062	9.2595	6.68287	12.0927	6.97588	4.61471	0.303798	3.91835	6.16025	2.48548	5.08593
1.54357	6.98944	8.8202	4.67239	0.66591	6.98266	3.18405	10.626	7.79811	2.50334	5.07711	5.48427	6.99395	10.3354	6.6104	10.156	8.11143	4.97579	0.428321	1.92206	6.15436	4.701	4.50038
1.33054	6.34075	9.66987	5.67057	5.47431	8.83961	3.56192	11.6342	8.64785	3.52075	4.82353	6.11932	8.07259	8.76639	8.96321	11.4393	6.32095	4.95976	1.04996	0.551661	6.5476	7.16224	4.27208
3.1323	7.95283	9.00929	6.24789	7.51965	7.45956	2.51015	11.3681	8.58313	3.90539	4.15324	6.62201	9.06132	9.53563	9.7697	11.1134	6.22101	5.02328	1.57218	1.93624	6.6893	4.78419	4.59662
2.08603	8.52421	9.30388	5.12755	1.20491	6.29416	3.41779	11.8579	8.23913	2.31313	4.75721	6.63013	7.18088	10.0138	7.91315	10.7611	7.35489	4.03936	0.554704	5.04263	6.14134	1.36868	5.76749
2.57413	8.3876	8.80331	6.20038	5.85988	8.11367	6.13925	11.7094	7.49378	3.09533	3.76229	6.95494	8.53014	9.20622	9.95888	11.2206	6.53277	4.01421	0.726653	2.07326	6.42449	2.68705	4.65689
0.982917	7.06736	9.41523	5.03714	5.51524	5.99897	3.81755	11.6093	8.28859	4.38124	5.20586	6.8983	8.52293	9.07474	8.95968	11.8246	7.13206	5.90239	1.29428	1.9716	6.89059	1.37314	4.40748
2.1278	6.38856	8.52601	5.0885	0.959126	8.31332	5.32355	11.3709	7.70997	2.58604	4.68089	5.997	7.41031	10.6874	7.44751	10.5938	7.18661	4.24768	1.48724	1.61657	5.98224	7.19851	4.25135
2.22878	8.37894	9.79351	5.62072	8.53432	6.53576	1.2854	12.9141	7.2482	3.43601	4.08711	6.7726	8.80017	9.26941	8.63511	11.3985	6.64001	4.66974	0.475632	1.62881	6.97129	0.723372	4.81417
1.94145	8.23545	9.55498	5.71725	2.4686	6.25105	1.91273	10.7298	8.42701	2.77631	3.52539	7.18633	6.338	9.06891	6.77126	11.999	7.85106	4.56788	0.863564	6.80896	6.76418	0.565617	5.31806
1.55588	6.13298	8.88613	5.10923	1.93948	6.23097	3.01154	10.4688	9.24388	4.05278	4.27008	5.92376	7.28572	10.0703	8.27537	12.2922	6.39724	3.4655	0.619164	1.46369	5.98727	3.20539	4.55256
3.11692	6.37004	9.36414	4.77352	1.78826	6.51251	4.93369	8.64716	8.34154	3.62847	3.35531	6.07537	6.27212	8.25933	7.72594	10.5085	7.15375	4.5084	0.726971	3.7322	6.53717	0.220204	6.89368
2.30998	7.24196	10.0596	5.3591	2.77343	6.77602	5.18348	10.1917	8.65457	3.6506	4.58744	6.02912	7.05478	9.0992	8.3028	10.8342	7.21841	4.86941	1.14612	2.28495	6.97992	0.732562	4.88214
2.0392	7.61059	10.0214	4.88881	5.78572	8.39892	2.1804	12.4522	8.44816	3.88875	5.34671	7.99585	7.84846	10.9116	9.60144	10.2463	7.33736	4.75817	0.699418	1.66993	6.10374	1.02244	5.47012
2.52374	7.48136	9.99256	5.18035	4.99745	8.16297	2.76273	10.8674	7.89011	3.61579	4.00652	6.85447	7.37625	9.70158	7.89034	11.1159	6.89347	4.73747	1.37212	3.03367	6.82593	3.34258	4.66546
2.55439	7.78013	9.21784	5.50771	6.35531	6.75536	2.22764	11.796	7.99649	3.63006	4.52935	7.0026	8.64253	10.139	9.08955	10.8211	7.22153	4.36108	0.206596	3.5682	6.57488	3.12446	5.04593
1.8029	6.97986	9.24336	5.70632	1.62448	7.4937	3.63708	11.802	9.35319	4.34215	4.1962	7.57346	7.12454	11.236	7.35073	11.6697	5.87598	3.39357	0.416455	2.72412	6.82018	0.492722	4.54481
1.93082	7.70281	9.94599	4.60017	6.6929	8.07304	3.72201	10.8451	8.85236	4.18008	4.92858	7.56567	8.52488	9.75062	10.1865	10.2376	6.64633	4.69622	1.34835	2.35939	6.96885	0.879484	4.24804
2.13788	7.15072	9.86622	5.63493	3.18315	7.24801	8.03806	10.7562	7.55226	4.99331	4.31002	7.06336	7.11659	9.83819	8.41766	10.0795	7.04151	4.01325	0.981957	2.41776	6.87092	3.02321	4.34581
1.31279	5.45503	9.40394	5.30218	5.79868	7.63423	3.46713	10.3927	8.53989	4.54747	5.30969	5.57452	8.66604	8.8963	9.43998	11.1159	8.37334	4.77	0.867875	1.17016	6.49047	0.0877673	5.83358
2.72437	7.25613	9.50382	5.57661	6.32682	8.22406	2.10976	12.115	9.16481	3.86823	4.26722	6.42234	8.00147	9.55837	9.05369	11.6097	7.18692	4.20538	1.29192	2.45122	6.14434	6.10839	5.05123
2.76417	8.20114	8.74435	4.91875	1.82127	6.50863	4.37839	9.90818	8.18644	3.34654	4.50457	7.26205	7.47944	9.17327	7.6429	11.5143	7.10822	4.13394	1.41916	2.90574	7.47752	1.95808	5.53751
1.60566	7.60016	8.11965	5.4365	4.69735	7.21753	5.81507	9.36976	8.13592	3.47175	5.66912	7.68455	7.72897	9.11512	7.63872	11.7736	8.15375	5.27063	0.193399	3.13136	6.9576	5.5871	6.14201
1.87888	7.82676	9.48783	4.89531	3.55642	6.27919	4.67481	8.53065	7.64495	2.64076	4.58701	5.80291	6.71325	9.51765	6.16753	10.5435	7.04709	4.01829	0.506666	4.86317	5.98645	1.65647	5.98848
0.983538	8.25905	10.2968	4.77958	3.31686	7.20726	5.02649	10.9081	8.53648	3.28903	4.41466	6.98458	7.71267	9.28829	7.30224	11.2398	7.97077	4.901	1.42999	4.0048	6.9881	2.94916	5.49468
2.54259	7.20933	10.0438	5.71729	2.29374	6.01094	5.64408	9.33214	8.05689	4.05148	4.73197	7.22078	7.63827	10.3119	7.20101	11.9132	7.37228	5.19078	0.403559	3.21632	6.48499	0.862368	6.11416
2.50289	7.74808	9.8177	5.36812	3.63205	7.15494	4.79258	10.6457	7.57259	3.31094	4.10154	6.26808	6.93699	9.61975	9.20876	10.4689	7.51959	4.19789	1.57837	4.83369	6.5718	1.32336	6.35496
2.7932	5.80857	9.05274	6.03455	7.29207	6.65416	4.0782	9.38278	8.39572	3.82171	4.66819	6.59058	8.8659	8.99381	9.18703	10.0664	7.26874	4.42764	0.598794	2.14206	7.25365	2.17034	5.01493
1.05403	8.88742	9.59666	5.14646	1.76537	7.03078	4.11405	11.6053	7.92351	2.59965	4.48166	7.3725	7.23338	9.82928	6.49841	11.3395	7.93683	4.79055	0.329946	3.4973	6.51326	5.86426	5.87101
1.91769	7.88645	9.30198	5.23523	2.93658	6.44911	5.87355	11.451	8.23696	2.19814	4.32885	5.60402	8.02125	8.52839	7.27675	12.7238	7.10441	4.90294	0.539837	2.12178	7.01092	1.99705	5.40982
1.71482	7.22366	9.29968	4.57265	5.50682	6.75543	2.21011	9.69473	8.57143	3.1595	3.82408	6.82767	8.41583	9.23155	8.26206	10.5814	7.4039	4.50437	1.34075	3.64167	6.51665	1.2893	5.14146
1.85883	8.35632	9.84491	5.24505	6.3573	8.16123	3.21688	10.9804	8.46482	3.30752	4.30141	7.11334	8.30621	9.18838	9.33198	10.8249	7.71215	4.87398	0.959227	4.27921	7.06028	1.07051	5.40503
2.56504	6.26603	9.87021	5.04476	3.4272	8.03536	3.26129	9.77591	8.03705	3.644	4.51291	5.64316	8.54522	8.629	10.0497	11.3445	7.03331	4.4834	1.8801	1.27612	7.46193	1.72581	4.43924
1.51409	7.95963	7.93919	4.37162	1.13695	5.69247	5.3644	9.28614	7.73692	2.80436	4.25717	6.71556	7.15154	8.86763	7.42175	11.2213	7.3627	3.57131	0.436063	2.98374	6.49904	0.228635	5.04995
2.48375	8.09652	9.41179	5.03186	2.88788	6.52137	8.24637	9.86239	8.20807	4.10069	3.95203	7.08846	7.44255	10.7136	7.66225	10.7601	7.65015	4.28428	0.774907	3.66297	6.74471	0.340465	5.49666
1.60773	6.70715	9.316	5.5784	3.17715	5.28429	2.48535	10.9606	9.15577	3.96171	4.04139	6.65342	7.54235	9.25857	6.32228	12.4587	7.16223	4.59236	0.927173	7.78557	7.25817	1.48072	4.7559
1.97687	7.74652	8.97151	4.47697	2.6177	6.65061	3.5757	9.62961	8.13105	2.50802	4.23932	6.00447	6.67064	9.55049	7.05336	10.9613	7.51277	4.01389	1.04173	4.80278	6.31406	3.24321	5.32052
2.3842	6.47569	8.88112	4.50285	1.7221	8.71626	3.0578	10.209	7.75131	3.41161	4.56204	6.99988	4.96334	8.28872	5.09216	12.2452	8.13537	4.56396	2.61635	1.49836	7.28989	2.59869	4.47369
1.94924	7.00499	9.00305	5.45801	2.1927	8.00411	5.11614	10.3098	9.05214	3.98897	4.66124	7.13757	8.69594	9.69152	10.2069	11.9724	6.92478	5.43857	1.2151	2.85273	7.49834	3.7613	4.91445
0.427441	8.27073	9.12915	4.64889	1.12455	5.56694	6.09124	10.3651	7.72621	2.04779	5.14095	5.74936	8.10004	10.1354	5.50903	11.9185	6.64499	2.73156	0.201266	3.99066	5.67024	1.04237	5.64373
2.43478	6.51389	8.25333	4.63784	1.25617	8.0293	3.14825	11.5034	7.71557	2.59683	3.97574	5.70727	8.21661	9.10965	6.8506	10.6503	7.45257	4.78316	1.33759	3.87128	6.83816	5.20595	4.52696
2.0273	8.09331	10.6671	5.01913	5.4141	7.90775	2.96275	12.174	8.74984	3.23803	4.50619	8.42177	9.18542	8.27475	10.4082	11.3672	7.80484	4.86201	1.10699	1.41942	6.77242	1.27464	5.38413
1.01935	7.59466	10.1235	4.63962	5.92372	7.53491	5.36791	9.94601	8.52664	3.21672	5.04567	7.81972	9.2417	9.32409	9.34876	12.3068	6.98775	4.48345	0.100016	4.3069	6.16362	0.0616568	5.10896
1.77787	8.73615	9.5158	5.63309	2.1812	6.62402	4.42523	11.2165	8.65566	3.48516	5.36306	5.60994	7.84373	7.57086	7.43837	11.8973	7.76103	4.95803	1.40136	2.6992	6.81913	1.64468	5.49421
2.03878	7.93654	8.89144	4.95396	2.15639	6.81618	4.51299	10.5765	9.0589	3.36562	4.83315	6.95363	7.39975	10.4042	7.99928	10.6053	7.73514	3.84729	2.14911	4.1462	6.80743	2.61487	6.11629
1.85179	6.55982	8.13914	5.15954	1.0077	7.74243	6.26767	11.9939	8.99441	3.46987	3.97305	7.2936	7.3269	11.2927	7.90736	12.3002	5.98251	2.60225	0.420245	1.12614	5.82164	6.12208	5.13214
1.82343	8.38249	9.34516	5.35371	4.07696	7.73091	3.12453	11.511	8.29354	3.60144	3.71826	6.94204	7.37752	8.39383	9.31898	11.9041	6.43766	4.66915	0.695782	3.09883	6.51402	0.231417	5.08225
1.95605	7.07431	9.47944	5.09521	3.05818	7.36277	2.75825	11.1554	9.15716	3.23403	4.96775	7.04686	7.53433	9.02808	8.88765	11.497	7.94292	5.87048	1.64041	2.18939	6.78176	5.52938	4.66667
1.60846	6.83463	9.87225	4.81614	1.93541	5.14762	4.57166	10.3583	9.1909	2.96434	4.31469	4.80469	7.47174	8.40166	6.04857	12.1271	7.41345	3.70559	0.509377	6.76756	7.26777	0.0560619	5.29576
2.55229	7.45897	9.28021	5.42381	2.58252	7.207	6.74838	10.6615	8.07796	3.01477	4.09838	6.46603	8.38835	9.05522	5.98197	11.4245	8.18691	5.487	0.579276	3.10156	6.74963	8.6186	5.31071
1.1905	7.13978	8.81623	5.22411	3.26307	7.28816	3.77641	10.9117	7.03722	2.0278	4.13533	5.73131	7.05443	10.072	6.92308	11.5396	7.23077	3.97102	0.695946	3.6638	6.38937	0.160037	3.46702
1.65833	6.15386	9.16258	4.16099	1.87379	5.84766	3.56836	9.23164	7.51443	2.0412	4.60258	4.84987	7.46953	8.48654	6.18368	10.4477	7.33917	3.82894	0.735556	2.72269	5.68825	1.96311	4.50103
1.50323	6.82729	9.2074	6.0826	3.14467	6.61952	6.2402	10.1799	9.08717	4.06825	5.15539	6.6711	7.81635	7.85518	7.36858	13.125	7.37686	5.55232	0.546535	3.48309	7.5275	0.752578	4.89432
2.51704	6.68296	9.19936	5.4615	6.60697	7.70539	2.26097	9.25124	8.03936	4.0359	4.54019	7.6045	9.45485	9.53942	8.55943	10.7372	6.38764	4.36366	1.2022	2.67296	6.57899	0.944592	5.06428
2.2253	6.85541	9.75116	5.17536	5.63471	7.62419	1.66343	9.21966	8.15709	3.99727	4.45769	7.03981	8.496	9.4051	8.08013	10.8086	6.39162	4.76418	1.92231	2.36778	7.3662	0.735727	4.35218
1.85776	6.80858	8.69059	5.53255	1.40335	6.87541	2.05397	11.107	7.30757	2.59806	3.9517	6.42344	7.21064	10.2433	5.26725	10.4825	7.63947	4.65708	0.139476	1.98477	5.26023	4.51451	4.53631
3.2023	7.88383	9.59263	5.50592	3.03244	6.13223	4.34897	10.6718	8.5922	3.75797	4.43602	7.3384	7.74177	8.52205	9.35447	10.7571	6.47698	3.73571	0.728394	1.98893	6.28689	0.943989	5.20834
2.07869	6.22832	9.19371	5.3866	2.58588	7.61826	5.21052	10.6745	7.9089	3.32503	4.80906	6.64979	8.15555	8.66149	8.61952	12.1341	7.02021	4.29872	1.11105	2.38146	6.39161	6.19228	6.21465
1.60287	6.91983	9.60259	5.58008	5.69969	7.78975	2.89151	11.983	9.04338	3.19508	4.77841	6.62089	8.4984	10.8512	10.1048	10.6754	7.80258	5.60822	1.93875	2.15187	6.93302	0.253721	5.17414
2.04752	7.62484	10.0289	5.17541	6.7962	7.44153	2.9481	10.3548	8.98213	4.21076	5.15572	6.02455	8.00832	9.93054	8.17618	10.629	7.34674	4.17944	1.05758	2.14637	6.54501	1.80493	4.64115
1.84906	9.02696	10.1374	5.0839	3.66563	6.43778	3.6214	10.5738	8.47491	3.21347	5.03533	5.39492	7.39084	10.1064	6.55351	11.5865	6.26514	2.86676	0.212428	2.94717	6.07365	0.254574	5.80447
1.93027	6.85661	9.61484	4.72581	1.97493	5.39014	4.27411	9.69657	7.55057	2.53871	4.24308	4.84095	6.24883	9.36552	5.18872	10.4483	7.19005	3.29965	0.187821	6.28185	6.09968	0.843972	5.35609
1.65681	6.27979	9.44819	5.06054	4.95366	8.41435	3.7684	10.6518	7.94171	3.78318	5.23244	4.8668	7.47563	9.83316	10.2487	10.8848	7.82126	3.68101	2.31663	2.91853	6.57657	2.26025	5.62933
1.89348	8.18554	9.79597	5.01368	1.42084	6.28919	4.66293	11.8258	6.60465	3.46186	4.12847	7.56185	7.82714	9.09083	6.64865	11.4152	7.21848	4.15645	0.820292	2.49192	6.92714	0.296471	4.75903
2.13343	7.731	9.04911	5.02821	1.54068	6.76157	3.11379	10.6428	8.09048	2.57612	3.41059	5.95196	6.24111	9.41982	7.89469	9.96322	6.98341	4.46464	0.932469	3.1865	6.06685	4.23714	5.33801
2.41319	7.35649	8.89024	5.6364	1.8635	6.76648	5.08949	10.2023	7.65661	3.0083	5.47175	5.88754	8.40063	10.6166	7.97158	10.9123	7.12328	4.52697	0.68833	2.53322	6.48356	0.393061	5.95635
2.09558	7.1457	8.66686	5.99106	7.49882	8.66607	2.88675	11.3483	8.29898	3.9256	5.09244	7.27537	7.72004	8.96976	8.06782	12.1975	7.66787	4.88761	2.56883	0.969143	6.79616	6.42326	5.17421
3.20067	7.48613	8.94546	5.42505	3.46349	7.27344	4.78271	10.6174	7.39343	2.58675	4.39639	5.268	7.45852	10.1484	7.0995	10.1657	6.81038	3.59279	1.18975	2.61222	6.14621	4.13499	6.60599
3.10382	5.99246	9.16681	6.64461	3.45335	6.26578	4.64294	9.49636	9.00939	4.07465	4.74531	6.25454	7.42487	10.539	8.83554	11.6781	6.27529	5.06403	1.02944	1.57393	6.2256	0.841306	4.75899
2.17842	5.27874	8.08587	5.86639	5.27411	7.20813	0.924843	11.7957	8.25321	4.50009	5.38335	5.67214	8.22386	8.5789	9.10518	12.0792	6.99231	4.76841	1.4726	0.398327	6.66264	4.20606	4.58639
1.88069	7.44804	9.75283	4.75685	6.42553	10.3972	3.49592	11.0857	8.86556	4.21179	5.80957	8.01241	8.82752	9.51265	8.072	11.4509	7.76299	5.49325	0.98511	3.47983	6.78486	3.90587	4.81777
1.67957	8.17541	8.94079	5.05897	1.75603	7.27993	4.64976	10.689	8.57642	2.77073	5.14001	6.28068	7.83084	9.846	7.54688	10.9778	8.53651	4.72229	0.158465	3.24852	6.6726	4.98276	5.90752
2.03762	6.87628	9.69085	5.21693	5.10555	7.30346	4.46699	10.7552	8.36015	3.63322	5.15245	6.77948	8.33267	9.06307	8.87064	11.3054	7.68894	4.11942	0.92769	3.64514	6.41016	5.40084	5.08845
1.84418	7.75676	9.7216	5.57266	3.28064	8.2683	7.30164	11.0911	8.8152	3.516	4.77748	7.34529	7.75968	9.94472	7.0679	11.1898	7.72216	4.57154	0.689257	3.01587	6.50179	7.44267	5.96068
1.44375	7.80392	9.88011	4.76445	1.52801	5.85565	3.97509	9.54613	8.51771	3.34643	4.26353	5.66358	7.62943	9.25498	7.28966	11.2097	8.1096	4.39623	0.627509	4.02927	6.60194	0.671832	5.97831
1.8009	7.37218	10.1215	5.35708	2.58954	6.86463	3.10254	9.78694	8.73226	4.49773	4.66032	6.8935	7.79136	8.57597	9.09009	11.898	7.75358	4.91201	1.85526	3.12193	6.73674	1.06959	8.27835
2.18085	5.90468	8.92316	5.0389	4.05584	5.67352	4.96873	9.02374	8.27731	4.25121	6.57861	7.31273	7.29139	7.18696	8.88153	11.4913	7.961	3.42261	2.39935	4.40446	7.94127	0.109439	4.24018
1.96972	7.21986	9.40203	4.92138	3.72637	6.04155	6.56448	9.82852	9.65669	4.40692	5.34859	7.22987	7.78997	8.85387	10.2724	11.7384	7.7325	3.32673	0.415024	2.29908	6.69166	0.209088	5.42121
2.41321	5.91478	9.88259	5.93571	2.69445	5.4456	4.52412	9.88974	8.17265	2.98906	4.89578	6.42541	7.43733	8.29093	6.23707	12.4799	7.25055	3.40086	3.09372	2.16924	6.88053	3.91497	3.67247
2.49992	7.22185	8.74005	5.27414	1.42365	6.28763	6.81587	8.00498	9.24568	3.89866	4.07644	7.22008	7.1764	8.82408	7.44921	12.0848	6.96902	3.61603	1.01234	1.83181	6.95572	1.45782	5.45175
1.64455	6.43244	9.38746	5.78124	5.49552	7.26458	3.69602	10.623	9.16255	3.66646	4.54	8.56123	8.8699	8.75992	10.2806	12.6588	7.03906	4.55691	1.97904	2.3228	6.5456	1.81658	5.30031
1.77029	7.46145	9.53812	4.64749	6.81123	8.82744	3.87002	11.5465	7.92689	4.21189	4.37773	6.74256	8.71483	9.85465	9.98024	10.5681	7.79828	4.72754	1.1635	2.55843	6.4125	0.510209	4.95613
2.06148	7.53839	8.4879	5.37009	1.19694	6.91957	2.60239	11.4645	7.77092	2.79039	4.95579	5.8881	7.21592	9.36405	6.79279	12.6129	8.00178	5.21893	0.849196	2.93399	6.73352	2.35449	7.59551
1.28161	8.09568	9.00957	4.32141	1.34911	6.87582	6.4257	10.6896	8.26945	2.49255	4.92702	6.59491	7.39845	9.28642	6.81685	11.6331	7.85345	3.82016	0.138073	2.85896	6.93957	0.520462	5.75634
1.55291	7.70699	8.96873	6.06653	6.28677	6.87566	4.85314	12.2734	8.35196	4.1151	5.35039	7.97278	7.06656	9.98781	9.62234	12.3946	7.68358	4.45903	2.30826	1.04625	6.1373	0.877314	4.89933
1.98538	6.58372	8.62545	4.71116	2.13249	6.78896	2.89086	11.5125	8.268	3.04745	4.47972	6.64757	7.34663	9.42105	7.3105	11.1531	8.3012	4.78753	1.63468	3.48745	6.52834	0.961278	5.33788
2.35405	8.91606	9.55897	4.48631	3.08999	6.24984	5.07556	11.8396	7.85466	3.45105	5.16917	6.42307	7.96904	10.1658	7.07022	11.1571	8.53459	4.15518	1.85225	3.04417	6.31152	0.473637	5.146
1.55031	7.95104	9.1032	5.20607	3.76681	6.41378	4.9424	10.7178	8.41008	3.39793	5.317	5.6161	8.79995	8.53689	8.60355	12.1191	7.83287	4.89532	1.09106	3.93025	6.36039	0.166361	5.68918
2.41188	6.87462	9.38067	5.03012	5.91363	7.65658	3.64426	11.73	7.93938	3.6468	4.2723	7.4524	8.03211	9.24481	8.58662	10.5811	7.41351	4.79708	0.277244	3.44194	6.36109	0.47158	5.53772
2.12663	6.12399	8.47618	4.54759	1.24235	6.27128	4.80754	10.472	7.53237	2.42936	5.06853	6.97006	6.62383	10.1023	7.76779	11.5071	8.06641	4.18668	1.07043	3.2127	6.14546	3.08215	5.47693
2.16201	7.55104	9.57333	5.22498	7.03818	7.40346	3.4917	11.0587	8.97832	3.71162	4.79521	7.6031	8.79972	9.91023	9.11791	11.0805	7.72155	4.19201	0.596516	2.46579	6.47858	1.3979	5.19074
1.79102	8.36273	9.65675	5.05993	4.26497	6.91423	4.83906	10.6493	8.67735	3.94349	5.10524	7.97704	7.66719	8.7819	8.20428	10.9421	8.32249	4.83971	0.651089	4.19467	6.48022	2.51053	5.4664
0.644908	7.77233	8.36293	4.57062	0.949653	6.60522	7.53087	11.7021	8.54695	2.61123	5.48019	6.86243	7.26673	9.59782	6.92008	11.885	7.80962	4.52466	0.420764	3.0661	6.02572	4.32574	4.70282
1.97105	7.94418	9.46053	4.68252	1.64292	6.96641	6.49847	11.1203	9.24852	2.3002	4.74296	6.45159	8.47123	9.44813	7.10185	12.4101	8.85845	5.06028	0.339253	2.25502	6.75996	2.18951	5.47223
1.01174	7.28021	9.38314	4.50979	4.11591	6.51738	7.21456	10.9853	8.61718	3.31591	3.90069	6.65295	7.20655	8.59727	8.27606	11.8555	7.651	4.29026	1.22565	1.71139	6.62071	1.89801	4.84741
1.49953	6.11333	8.61607	5.6213	5.14997	6.59721	3.13835	11.4539	8.79573	2.81507	5.41131	3.52061	8.44686	8.64746	6.76234	12.7682	8.60554	5.07694	0.820937	2.63833	6.12178	3.43908	5.48858
1.80828	8.05668	9.58519	4.3384	6.65445	7.59686	3.30827	11.6992	8.13917	2.1767	5.23089	7.47956	9.42349	9.88173	9.63482	11.0384	7.42854	3.92553	0.160421	2.51319	6.46349	3.89912	4.35303
1.80318	6.76372	9.19132	4.71047	1.55518	6.06047	5.42762	9.41735	8.39573	2.72301	4.75378	5.7192	7.62111	10.2177	6.12833	11.7803	7.75355	5.47839	0.312552	2.17745	6.17559	0.134999	4.09581
2.4192	7.3156	9.67957	4.96166	3.23949	7.05781	6.83943	10.186	8.44669	3.65268	5.46743	7.72742	8.42933	8.97984	6.5678	11.8502	8.40389	4.70736	0.809917	3.9117	6.73125	4.47011	5.51646
2.43677	6.46279	9.45957	5.41521	6.64224	7.44198	3.03277	11.1302	9.02706	3.67133	4.31501	7.27018	8.46398	9.08286	10.3045	10.7124	7.13638	3.94677	1.44023	3.47084	6.99615	0.490929	4.811
1.85329	8.21088	9.78713	5.36863	3.61541	7.1362	4.19774	10.4231	7.22427	2.57473	4.51257	7.77672	7.92296	8.76391	6.8324	10.9396	7.693	4.41057	1.16617	3.17084	6.43757	5.459	5.19418
3.52844	7.12556	9.8256	5.5504	2.28916	6.80613	3.78922	10.3958	8.18325	3.85523	5.01726	6.53305	8.27211	8.92314	8.5955	10.807	7.24033	4.84274	0.910167	4.30359	6.03072	2.73714	5.89057
1.46647	7.43109	9.325	5.10617	2.46042	6.47369	3.6633	10.1585	7.46416	3.11522	4.99706	6.40587	7.1919	10.9422	7.98313	10.4685	7.86555	4.70614	1.95069	2.51246	6.98887	4.31792	5.29252
2.20044	6.15899	9.50976	4.75116	4.73807	7.58262	3.32874	11.0763	8.3542	3.42724	5.07743	6.22172	8.04768	8.81602	8.6188	11.5228	7.4964	4.86518	1.34953	3.05797	6.74617	2.09247	5.3705
1.85382	7.00224	9.52728	5.19987	4.69324	9.17076	2.63461	10.7945	8.16913	4.32224	4.11697	7.23559	8.19326	9.04585	9.46739	11.5839	6.97704	4.40807	0.979509	3.93088	6.92467	3.38884	5.71857
3.33625	6.75994	9.15979	5.33181	1.28044	7.29021	3.93878	10.3204	7.63355	3.96641	5.1212	6.88538	8.67586	9.87969	8.24759	11.7091	6.76401	4.41436	1.96607	2.16532	7.13947	3.1422	5.60418
1.27833	6.46301	9.15308	5.3214	7.11779	8.31273	3.38922	11.5971	9.54623	4.32252	5.84156	7.21436	8.05284	8.76101	9.93713	12.884	7.77851	4.99996	3.79521	2.42158	7.21008	2.76115	4.93933
1.70728	6.88959	10.0646	4.69653	4.35852	7.99222	3.89683	10.411	8.13385	2.78987	5.02863	6.30378	8.65961	9.14353	7.95944	12.2032	8.47324	4.19137	0.200554	2.64156	6.75353	1.1388	4.73772
1.70262	7.67454	9.79893	5.71108	4.87566	7.08804	4.23505	9.91397	9.74113	3.45608	4.69761	6.78723	7.55294	9.3451	10.2528	11.7851	7.44858	4.34102	2.36847	4.17927	6.80831	1.75411	5.69738
1.62299	7.82778	10.0791	4.78402	6.65737	7.87784	1.77573	12.0297	8.55195	3.68407	4.89681	6.93889	8.26682	8.04943	10.144	11.4262	7.33168	3.99964	1.85222	1.22289	7.18499	0.265549	4.52398
1.50066	8.0635	9.73217	5.448	6.68538	7.44764	3.15409	10.5101	8.06891	2.87657	4.63117	7.47758	7.88777	9.04983	7.03406	11.5572	7.5081	4.22783	0.432244	4.17825	6.89792	8.9546	5.73216
2.39107	8.43941	9.39837	4.98395	1.337	8.18497	3.95299	11.9414	8.06099	2.00135	4.27629	6.64914	8.11504	10.3533	6.46617	10.3811	6.39681	4.24082	0.731346	2.80522	6.26617	4.82829	6.08759
2.60337	7.98504	9.57868	5.05894	3.0161	8.23184	6.49464	11.0288	8.39538	3.15064	5.13908	6.24709	8.94382	10.0613	6.80757	11.7728	6.93355	5.68971	1.47367	3.44624	7.12952	9.72658	5.93475
2.33287	7.35218	9.05054	5.23957	2.06282	7.11563	5.09869	10.3989	8.55699	3.97307	5.83925	6.46721	7.56099	8.66628	7.60281	11.8893	6.59668	3.93202	1.87198	2.94515	7.06693	0.485205	5.37322
2.38572	8.21325	10.0932	5.24196	1.88736	6.25597	2.77799	11.0354	8.13733	2.56657	5.14051	5.56939	7.40171	9.31677	8.1391	10.5097	7.44794	4.28663	0.749353	2.09979	6.14372	7.2161	5.59503
2.06365	7.84296	9.89745	5.2623	7.58639	7.55134	2.19242	10.1854	8.18929	3.83809	4.07378	6.69026	7.73963	9.9893	8.02226	10.9726	7.11276	4.79585	0.852073	4.0362	6.62344	1.82245	4.53673
2.8086	8.18416	9.84107	5.3189	3.31846	5.5154	1.81294	10.2997	9.30117	2.92937	3.6696	5.69697	6.51907	9.26753	4.65551	11.6511	5.51861	2.48373	0.329764	0.974549	6.24216	0.797778	5.62463
1.83292	8.39247	10.7613	5.30532	2.05239	6.37326	4.97522	10.576	7.80451	3.62581	5.22079	5.86629	8.39803	7.98276	5.98698	10.6119	8.09303	4.63364	0.145691	3.65761	6.27982	0.160295	6.15384
1.81752	7.71538	10.0722	5.09288	5.63227	9.56371	4.06976	10.6673	7.39906	4.01092	4.73438	7.03793	8.48455	8.01153	10.4726	11.6049	8.8212	4.69604	1.85154	2.55497	7.03793	0.819459	5.96043
2.45574	6.64335	9.88211	5.87436	2.23118	8.05215	3.54541	10.2168	9.14916	3.95695	4.73169	6.56483	7.76331	8.28968	7.01845	11.52	8.23956	4.67514	0.677053	2.50285	7.31731	0.0588435	5.16158
3.01695	6.36275	10.5093	5.48861	7.06082	8.3047	3.81714	8.55342	7.98609	2.82332	4.28031	6.46076	9.96053	8.29084	7.81467	10.7194	7.83418	4.95772	0.679929	0.996723	6.804	1.64647	4.42731
2.52773	6.99748	8.80315	5.5866	2.26629	8.37584	3.10725	12.2069	7.64369	3.67304	4.72214	6.55862	8.35737	9.08031	7.11081	11.7293	7.47641	4.66167	0.900605	1.77076	7.14498	7.04698	4.70083
1.14451	6.75884	9.62666	5.05671	6.30085	7.24718	3.79294	11.0429	8.00319	3.34945	5.33938	7.44053	9.2371	8.56648	7.82469	11.9083	7.06775	3.77175	1.68761	1.65261	6.68566	1.8997	4.65163
2.57167	8.71259	10.2303	5.62489	2.89908	5.96766	2.51598	10.2404	6.32262	3.08047	5.05804	4.7633	8.13292	8.1912	6.4556	11.7247	7.44696	3.47883	0.0485062	3.1532	5.78492	0.57075	5.07548
1.97409	5.76981	9.85224	5.97212	6.10163	8.33087	4.4524	11.8585	8.32709	3.58246	4.84787	6.29331	8.35108	8.7823	7.64233	12.3093	6.64018	3.25214	1.28537	4.69231	6.84486	0.729113	3.59541
1.15089	7.53464	9.89133	5.37876	5.49559	9.0688	2.79382	11.0242	8.0722	3.10101	4.67567	6.42934	8.38576	8.17039	9.64013	11.9145	6.18508	6.10424	1.44231	3.15326	7.02413	1.40304	5.08307
2.80956	7.24795	9.34151	5.22467	5.97064	7.70824	1.55538	11.018	8.29235	3.43363	5.04457	6.79228	7.99476	9.05249	9.31751	11.7411	7.09079	4.42381	0.887282	1.86442	6.61138	3.40682	6.15527
1.4112	6.52933	9.72369	5.0685	1.49823	8.40539	2.9874	10.9067	8.85203	3.40631	5.41756	5.92879	7.18936	8.44067	8.73855	10.8166	8.42675	5.92816	1.35318	4.50445	7.6063	1.08942	5.51362
1.38976	6.43222	9.39176	4.82759	1.39584	6.9401	2.9563	11.501	8.26666	1.5777	4.58314	7.34153	7.80882	9.70787	6.13617	10.7578	7.39537	3.29378	0.124385	3.29697	6.10957	1.09707	5.24667
2.6627	8.29785	11.0121	5.83623	3.13562	7.17337	6.1005	11.3361	8.55546	3.45921	5.42612	6.65242	7.94626	8.84951	8.27894	11.4837	8.54956	6.02722	0.732898	2.67546	6.63744	3.47615	6.19053
1.64942	7.9599	10.1543	5.08851	6.17586	9.29353	4.18664	11.5319	8.15554	3.00894	5.24446	6.95841	7.90998	9.19267	9.06622	10.9497	7.83565	5.18789	0.853651	3.6039	6.83041	0.225617	5.61211
1.44504	6.62373	8.70239	6.10723	5.48782	7.61277	3.16752	12.7878	8.35753	3.74836	4.93937	6.82213	8.19216	8.87196	9.21122	12.4072	6.71324	5.26478	0.141826	2.529	6.40993	4.30763	4.67228
2.7964	5.97218	9.36414	5.35836	1.47593	6.01536	6.40089	10.401	8.70825	3.87196	5.4091	6.97417	6.81915	9.26235	9.5956	11.3367	6.98147	4.21864	0.547031	2.48718	6.94297	0.273021	5.5406
2.20354	7.22036	9.32239	6.14033	4.5244	5.78041	3.73167	9.79216	9.05128	3.91901	4.78412	5.9046	7.75501	9.03434	5.43468	12.3802	7.27338	3.33067	0.301532	5.28928	6.99404	0.232728	6.05252
2.11715	8.52978	9.83755	4.9637	3.02787	6.79666	5.67765	10.387	7.05454	2.11378	4.79364	4.79478	7.71325	8.91653	6.09644	10.2696	7.49825	4.21851	0.194656	4.88511	5.94326	0.182913	4.93386
1.56126	6.06123	10.2659	5.15946	6.62938	8.09127	2.68737	11.5459	8.98861	3.93088	4.24314	7.7666	9.18616	7.69552	9.59299	10.8509	6.82908	5.09555	1.7016	1.93671	6.90004	0.0244999	6.42202
1.46817	7.06658	9.77152	5.62218	4.69833	8.41843	5.40347	10.8863	8.48271	3.9781	4.98312	6.18922	7.84359	7.86751	7.27128	11.7564	6.97871	5.21619	2.73295	1.85289	7.08348	1.62767	5.10594
2.29433	9.20008	9.38889	5.09291	2.23702	7.32944	5.00981	12.6289	8.11515	1.96469	4.60699	5.57384	8.81538	8.57247	5.55743	11.4514	7.04823	4.20749	0.0839793	3.00058	5.9475	0.133852	5.35641
1.68416	8.583	8.85463	5.31851	1.76354	6.25914	6.07038	11.7309	8.21941	2.62389	4.57932	5.64844	7.00281	9.05418	6.3264	11.5244	7.5035	3.56195	0.21698	3.67511	5.84331	1.14359	5.10684
2.20834	7.30302	9.20096	5.03834	2.91334	8.64235	3.13456	11.7158	8.49439	4.39504	4.11895	7.06314	7.67804	8.42652	8.02887	10.8318	7.09403	5.17425	1.89095	2.13304	6.75746	5.46379	4.91034
2.78606	8.75497	10.2313	4.92789	1.89404	5.88162	4.68065	10.4293	7.48846	3.42579	4.43891	5.8058	8.0338	9.67512	6.97845	10.3425	6.84845	4.68957	0.228582	3.89421	6.37893	1.24639	5.81022
1.96272	7.34388	9.67257	5.45594	3.34639	7.25063	4.21828	11.357	8.2247	2.77812	4.87307	5.066	9.20297	8.75284	6.99309	11.2368	7.60447	5.92751	0.517116	4.29697	6.33363	1.4353	6.24229
2.80019	8.53407	8.97795	5.31289	1.14931	8.16452	3.58544	10.6658	8.48216	3.9024	4.43714	4.83726	8.50407	9.1346	9.03746	11.3352	6.06572	4.3387	0.826803	2.185	6.6272	5.4664	5.18294
2.85306	7.50754	10.3217	5.95358	3.05036	7.15444	1.08532	12.3954	9.06689	2.80748	3.98844	6.7003	8.55127	10.3924	7.22232	12.185	6.25	3.92611	0.640397	2.42984	6.90558	2.04285	4.30061
1.8244	7.11248	9.40872	5.93673	3.66435	7.48665	3.66172	11.8182	9.79475	4.0437	4.20172	7.8175	8.10137	8.79336	6.1761	11.821	6.91494	5.01772	0.111798	2.4567	7.12851	1.61278	5.49758
1.90392	7.82447	10.0902	5.58988	4.26877	6.5376	4.14311	10.4974	7.80866	3.68376	4.95873	6.44073	7.54174	7.75814	7.84888	10.8929	7.61242	3.23041	0.110852	0.964049	6.43905	0.571229	5.89193
1.98796	8.72287	10.666	5.33169	2.83145	6.97943	3.38801	11.5678	8.12774	3.091	3.90351	6.34025	8.18013	9.17557	8.00779	10.5899	6.20689	3.87145	0.169568	3.52248	6.00694	6.53596	5.05154
1.82511	7.74761	9.29256	4.84312	6.44966	6.17043	2.0498	11.1134	8.46003	3.24546	4.62444	7.57003	7.90872	9.16158	6.70086	10.7979	6.89112	4.07585	0.618553	3.74923	6.43691	7.37652	5.57446
0.993331	7.37138	9.01734	5.13577	3.58664	8.03816	6.61084	10.8588	8.2877	3.88908	4.08608	6.80059	7.7858	7.83507	7.53855	12.5816	6.40768	4.32683	2.23397	4.01062	6.86459	2.22575	4.85285
1.47432	7.04642	8.46889	4.71219	6.28035	8.38924	2.71597	11.8622	8.45603	3.35406	5.02851	7.04776	7.68571	8.79876	8.59981	11.3539	7.39665	3.44451	2.29218	2.82086	7.09305	2.64246	4.77638
1.55575	8.52495	9.57252	5.49414	6.0881	8.06731	2.63376	11.7199	8.64446	3.88159	4.36735	7.60545	8.06454	9.17183	10.0441	10.972	6.38612	4.27908	1.80773	1.07146	6.51166	0.509887	4.61322
1.63889	6.9111	8.76093	5.00384	2.71195	8.44106	3.27238	11.596	8.61243	3.659	5.35032	6.20251	7.78407	10.0158	7.55488	11.3877	7.33177	5.34132	2.78062	1.73072	7.24214	7.10866	4.40765
1.98934	7.59837	9.77015	4.28133	5.05103	7.22743	6.6762	10.1337	8.24715	3.61125	4.33585	6.61098	7.82741	8.96064	8.76386	10.8894	6.82585	4.889	1.97452	2.66456	6.37867	6.45672	5.20636
1.9872	7.42136	8.99574	4.78793	1.28191	5.82068	3.86987	8.59603	7.76262	2.7444	4.5779	5.5823	6.02518	10.0373	5.24102	10.6967	7.20517	4.06563	0.268014	4.78784	5.76328	0.902438	5.93292
2.53956	7.5303	10.018	5.31271	1.88511	6.783	6.13336	10.6023	7.79367	2.31472	4.48012	5.95463	8.72513	8.87031	9.27386	10.7264	7.48727	5.28278	0.209722	4.18	6.09343	0.156015	5.67943
2.65944	7.21924	9.72226	5.15224	4.72524	8.79856	3.70695	10.8531	8.12582	4.01016	3.84651	6.90694	8.20625	9.00043	9.66728	11.4812	7.33987	4.05826	2.01574	2.36097	7.15339	2.27156	4.94255
3.69045	6.70613	8.86177	5.69374	1.71196	7.16852	3.14924	11.3787	7.72676	3.03139	4.43922	6.75472	8.43658	9.30639	7.8794	11.0641	7.25582	5.03644	0.311466	1.98971	6.60358	4.15038	5.05924
1.53492	5.10204	9.37766	5.40981	2.31717	7.16103	5.02631	9.93802	8.9452	3.58326	4.15628	7.10654	7.21675	10.3014	6.57674	11.3396	7.34602	4.0171	0.970718	1.20597	6.9694	0.497846	3.51547
1.31041	7.26182	8.67295	5.03845	4.75705	7.23118	3.68962	12.1087	6.95144	3.10469	5.03207	5.77357	6.90784	9.02012	6.47112	11.3505	7.55334	4.47117	0.538933	2.19044	5.95645	0.206977	4.23165
2.00961	6.97782	8.57191	5.1091	5.21503	7.98628	4.20678	12.0862	8.80739	2.78057	4.89971	6.78179	7.7309	9.51642	7.82362	11.347	6.41714	3.20519	1.12668	1.23392	6.38945	0.857206	4.43206
2.4278	9.16792	9.87948	5.01759	1.2385	6.42754	6.59722	11.0034	7.79049	2.73792	5.37201	6.12202	6.94188	9.66591	5.85266	11.0421	7.48699	4.5294	0.167836	3.34758	5.72366	0.263168	4.11487
2.12616	7.10155	9.73994	5.27486	6.57604	7.4183	1.75247	11.0746	9.94698	3.67887	4.38209	5.84064	8.67512	7.71115	7.57168	10.4703	6.5592	3.6798	0.921444	1.5321	6.37904	0.176972	4.74459
2.76274	7.31794	10.1684	6.27513	2.46577	7.0118	2.85816	9.6519	8.20983	3.65788	6.07322	6.18215	8.05444	9.1274	6.50902	11.1216	7.33825	4.37628	0.431195	2.32071	6.12532	0	4.56922
1.30451	7.04911	9.32839	5.26011	6.27097	8.3974	4.41153	11.1716	7.47847	3.17773	3.70098	6.92186	8.2746	8.93712	10.1717	11.7373	6.45269	5.54395	1.68303	1.17457	7.14761	4.25781	4.51296
1.81062	8.30107	9.51127	5.06465	1.41792	6.95033	3.05633	11.0945	8.58374	2.63123	4.51307	5.11956	7.69797	8.86787	5.71098	10.9302	7.83828	4.51164	0.558425	4.39557	6.4717	0.51096	5.99188
1.96562	6.20378	8.90645	5.50608	4.77076	6.28387	4.43294	7.60669	8.11973	3.96963	5.0154	7.72911	8.58585	8.20807	8.25155	10.716	7.72247	4.13207	0.242863	3.54009	7.10535	0.209295	7.99006
1.13441	7.17306	8.86367	4.61966	6.04242	7.56586	3.83637	10.3759	8.01878	3.15859	4.66031	5.6963	7.1559	9.0975	7.91319	10.9585	7.76279	4.71181	0.31104	4.08246	6.73485	0.818112	5.3125
1.49802	8.04254	9.56597	4.874	5.74792	8.56517	3.00187	11.7225	8.95764	3.21165	4.42984	6.20749	8.6207	7.86263	9.98562	11.7185	5.52969	3.7345	1.0676	2.30905	6.23132	0.257138	3.17093
1.59833	7.39603	9.7972	4.9525	4.75407	7.70435	4.3603	11.1343	7.59184	4.62347	5.08343	7.40054	7.48768	9.21183	7.71556	11.1484	7.75538	3.89304	1.4034	2.62653	6.21169	3.86614	4.34746
2.03426	8.4421	9.95573	4.88975	2.59954	7.75247	5.89625	11.2622	7.5034	3.05837	4.99428	6.14231	7.47113	8.68149	7.76389	11.0678	7.58173	4.39092	0.764843	2.82736	6.72904	4.01707	4.46338
2.01355	7.53541	9.67147	5.83288	6.955	9.37513	2.44151	10.9356	7.37278	3.12513	5.11711	6.75558	7.94769	8.89071	8.50202	11.5274	7.4852	4.44388	1.70586	2.2902	6.97466	3.8306	5.27049
3.0364	6.66669	9.46563	4.97358	1.41011	5.57955	5.14629	9.32053	8.60805	4.57854	4.43073	6.9177	7.04601	8.53972	8.39328	11.094	7.03791	5.2888	0.511204	2.83276	6.82349	0.451605	6.54565
2.61243	8.39465	10.3085	5.17802	2.32843	7.40274	4.33207	10.7351	7.29799	3.32454	4.77962	6.37492	8.50922	9.15788	7.91288	11.9653	7.27392	4.30881	0.377244	2.04455	6.6292	0.593583	5.04925
1.72681	7.34871	9.0888	5.79033	4.03224	7.58104	4.09663	11.6538	8.28755	3.97029	4.38037	5.7478	8.27096	9.35627	9.02246	11.6073	7.29333	4.87578	2.70126	1.87852	6.8915	1.37076	5.65694
2.75392	8.04299	9.95553	5.43996	7.11065	8.31962	3.81787	10.8346	7.89226	3.3696	4.65171	6.89157	8.08359	10.8689	10.0676	10.0163	6.98534	4.75054	1.21216	2.69285	6.31554	0.397312	5.32018
2.63139	7.60609	10.3903	5.43601	3.33487	7.04141	5.70043	11.3431	9.17971	4.21895	5.31342	6.12073	6.96276	7.95543	9.32496	10.7467	6.60981	4.2781	1.56202	2.48258	6.6565	0.782947	5.38211
2.34748	7.08228	9.92447	4.88813	1.8404	7.01683	5.85038	8.85955	7.63563	3.22126	4.78245	5.99891	7.1665	9.35381	6.16649	10.4274	7.58404	4.50983	0.509592	4.12744	6.40021	1.10665	5.6055
1.37976	7.5032	9.27502	4.57794	5.75543	6.79913	4.41344	10.6073	8.03379	2.96453	3.86722	5.94905	7.87406	9.03186	7.92097	10.5828	7.29246	4.77993	0.261631	2.69583	5.66506	5.18569	4.91288
1.87238	7.83834	10.0689	5.071	6.6675	7.80429	3.20254	11.5742	9.42479	3.17626	3.94118	7.11122	8.41374	7.78074	8.33949	11.5965	6.7791	4.10913	1.90774	3.39379	6.61083	0.487251	4.30328
1.83786	6.2019	9.60909	5.07908	6.43229	8.36593	1.41934	12.0837	8.34268	3.20676	4.10063	6.68324	8.42107	9.01037	9.75222	11.7807	5.3477	4.27196	2.41882	0.626	6.75471	4.19463	3.93013
2.89445	7.41231	9.64199	5.05712	6.02568	9.40843	1.624	11.665	7.25965	3.50298	5.37331	7.05926	7.85735	9.79113	7.11365	11.362	7.7544	3.47586	0.723701	0.594728	7.01448	6.48119	5.69157
2.16402	7.18591	9.44904	4.65903	6.45754	8.59691	2.81395	11.5999	8.23261	4.24759	4.83146	7.42034	8.17099	9.36397	7.44705	10.7963	7.08007	4.02063	1.24609	3.11196	6.72048	4.19444	4.40749
1.7347	6.52083	9.11527	5.68949	1.34174	7.11816	5.83951	8.77567	7.84095	3.81382	4.41944	5.77789	7.76761	8.62869	8.98756	12.0034	6.65814	3.97808	1.46985	4.16116	6.58061	0.393486	4.34347
1.15086	7.35971	9.55292	5.19616	6.30517	8.08321	2.781	11.3256	8.83601	4.42276	4.85646	7.54486	8.96775	9.64044	9.60422	11.5818	7.04059	5.21772	1.29044	1.57467	6.5657	0.0288797	4.64886
1.95635	6.6322	9.23377	5.11242	1.65721	6.31838	4.83851	11.4648	7.9413	3.67116	4.27389	6.26483	6.56175	8.88327	7.3727	11.0657	7.29546	4.25565	0.476064	4.19731	6.14768	0.461011	5.17348
1.98611	7.66195	9.45248	4.94402	1.33076	5.75045	7.65937	10.6907	9.19186	3.19778	5.83214	7.69656	7.63291	8.04074	7.90832	10.8881	7.13924	4.38607	2.46575	2.63206	6.84657	0.159757	4.97342
1.32959	7.12849	9.74299	4.92613	1.33761	6.57243	5.67852	10.8256	7.56698	2.93585	4.37755	6.00181	8.4108	8.45135	6.83828	10.8346	7.43014	4.91553	1.8594	2.73649	6.88305	2.87828	4.60304
2.57283	8.10682	9.75524	5.55901	2.84763	6.60886	3.59055	10.4634	7.81508	3.71782	4.79751	7.12587	7.7453	9.09747	8.81007	11.7442	7.00431	4.24126	0.415165	3.49164	7.00458	1.05226	6.55595
2.48381	7.70053	8.90074	5.00959	1.74574	6.1334	3.0036	10.7667	9.26079	4.18167	4.71026	6.62192	8.06665	10.7208	7.94795	12.0768	6.43141	3.91323	1.84495	0.348249	6.88844	0.189805	4.25943
1.62541	8.75807	10.3219	5.37045	3.51362	6.37008	2.31148	9.96565	8.60031	3.27539	4.12516	6.89743	7.56656	9.63668	8.32355	11.1785	6.59213	3.14484	0.741665	3.78314	6.53557	3.24673	5.55666
2.05893	6.3802	9.93659	4.3519	6.7179	7.77551	3.90435	11.7313	8.32932	4.26594	4.18479	6.82967	8.69087	7.396	9.22489	11.4477	6.74946	4.34183	2.09785	1.27541	7.31712	2.88473	4.85068
2.62189	7.76148	9.47999	5.18106	5.09236	8.37065	5.70313	11.0109	8.29775	3.37454	4.729	6.01933	7.97441	9.62073	7.8053	10.4571	7.67342	4.66599	0.612426	2.82417	6.63711	5.03841	5.24748
2.25189	8.67972	8.91905	4.90496	2.2229	6.41126	0.792451	12.5412	7.84162	3.70278	3.83814	6.64666	8.46854	10.1645	7.30964	11.5873	6.4	3.65903	1.12332	0.396857	6.24028	1.14964	4.1315
1.5946	8.43406	10.2732	5.73908	4.32481	6.52935	3.34112	11.7022	8.37752	2.39392	4.81386	6.47021	9.20976	9.15547	8.67566	11.2245	7.30579	5.12897	0.188425	2.16245	5.90985	0.368443	5.68792
1.99544	7.8181	9.15368	5.52407	4.91138	9.50552	4.89848	10.8462	8.13344	3.88971	4.26569	7.59937	7.70644	8.73746	8.08531	11.2027	6.80929	4.13406	1.47296	3.45402	6.82379	1.70688	4.92429
2.08457	8.50081	9.7339	5.86765	1.42335	6.61429	4.50027	11.8705	8.23519	4.05527	4.43905	6.22002	7.5532	8.524	7.46753	10.8292	7.30656	4.71116	0.134806	3.51926	6.23667	0.23723	5.86303
1.66641	7.87514	9.77328	5.24802	4.83297	5.70401	3.42741	8.8549	8.07035	4.00974	4.59315	5.68031	7.07769	10.1435	4.464	11.2462	6.43719	3.9215	0.128323	2.51259	5.68667	1.18105	4.72116
2.39436	6.85231	10.054	4.78861	1.34306	5.14392	5.11701	10.383	9.35902	3.66525	5.56916	6.91791	7.46595	9.5737	9.97887	11.4509	6.44156	3.97226	1.22506	0.583436	6.7649	0.938679	5.18646
1.3159	8.06831	9.8145	5.40861	6.09273	7.17417	5.37376	11.6317	8.568	3.81085	4.99615	7.29117	8.2818	9.46677	8.85653	11.1965	7.87356	5.85306	0.572557	2.87897	6.60416	1.19429	5.83504
1.29504	6.70446	8.61351	4.56921	3.2983	7.03706	3.66019	12.1246	8.92486	2.56531	4.25512	6.75631	8.75319	9.62517	8.03684	10.4665	6.24344	2.88074	0.498552	0.907825	5.96425	0.0762698	4.03032
1.74892	7.44052	9.90072	5.36675	5.60716	7.83714	3.26298	11.9848	9.63289	3.55023	4.35851	7.30319	8.61504	9.55872	11.2486	11.2404	6.42146	4.69423	1.64782	3.55794	6.64236	2.32111	3.98615
2.442	8.25749	9.77323	5.10892	2.10581	6.03347	3.94063	11.2941	8.33221	3.00837	4.50219	5.53717	6.97518	8.64734	8.23039	10.8828	6.77519	3.87345	0.311562	1.39106	6.08794	1.88831	5.19069
1.92045	7.7063	9.43469	5.00084	1.27588	5.98585	3.75515	13.2925	7.94553	2.48866	3.60749	6.38454	7.22535	10.3209	7.15242	11.4767	5.98955	3.38426	0.185532	2.58304	5.86789	3.20838	3.78207
2.7043	6.70025	8.08345	4.10789	1.25183	5.34432	1.39703	8.39885	8.29223	4.72695	4.09888	5.98337	5.57239	8.8114	5.65338	11.1551	6.86871	3.01184	0.373919	3.67656	6.29564	1.93901	4.75671
2.08458	8.18916	8.99812	5.7777	1.23001	6.65042	4.78522	12.266	9.2239	2.56713	4.19505	5.81178	8.49042	8.66352	5.79902	12.501	6.89592	4.11823	0.544976	2.8286	6.14817	0.933082	3.16446
1.92884	7.20731	8.91769	4.49383	2.47686	8.18969	5.17872	12.2621	8.50427	4.12993	3.75036	6.2071	7.44452	9.23592	8.16634	11.2455	7.20098	4.69337	1.91457	0.477751	6.64305	7.90319	4.66209
1.92414	8.86242	10.9293	4.25925	2.64291	6.38109	4.39949	10.226	8.12131	3.10418	4.90088	5.51868	7.9035	9.40102	5.65685	10.0042	7.34329	3.88478	0.422075	5.75367	6.31571	0.704868	6.24111
1.53134	7.0346	8.83201	4.64236	3.12017	5.88594	2.80442	10.6898	9.10843	2.16263	5.29697	5.52082	7.5145	9.47563	9.12159	10.7641	7.19868	4.87041	0.157472	0.915878	5.43648	0.0787748	6.20518
2.47911	6.63432	9.72348	5.31336	2.73144	5.59446	8.76949	8.76842	7.74937	4.10411	4.78072	6.84692	7.53645	9.00142	7.43801	11.4237	6.70369	3.51154	0.812201	3.04933	6.70511	0.282575	5.28122
2.13844	7.3183	9.77019	5.21291	4.51242	7.69648	4.01913	11.0447	7.85679	3.67362	4.73373	6.46156	7.8599	8.78746	8.28689	11.0743	7.96887	5.3735	0.803707	3.75651	6.47527	3.03854	4.93788
1.78021	7.92457	9.21239	5.61017	2.72689	8.74118	8.94191	12.7497	8.48663	3.58252	5.24402	7.32129	6.87225	8.96403	8.49555	12.1622	7.17968	4.35852	1.56018	3.04569	7.011	0.249542	4.46726
2.45341	6.18707	9.18579	5.02578	1.74753	5.17297	3.318	10.8172	8.53619	2.56303	3.97282	4.93641	7.02022	9.0312	5.08641	10.6293	5.98239	2.67305	0.291784	6.16125	4.9753	0.28872	4.5277
1.85899	7.22515	9.2343	5.42145	2.8515	7.49408	7.93868	11.5982	7.9569	2.91377	4.24326	7.2983	6.93489	10.5227	8.01412	12.1214	6.04941	4.53949	0.846775	1.86411	6.48226	0.270284	4.64559
2.86692	6.512	9.22773	6.09587	6.64462	8.40295	3.97374	11.7103	9.16333	3.14641	3.99449	6.36434	8.319	9.9973	7.54543	11.7763	5.65263	2.81284	1.06	1.12903	5.96525	3.20929	4.77973
1.63604	7.98374	8.89415	4.76244	2.86123	5.11726	4.65691	9.90629	7.34604	2.89527	3.7623	5.92682	7.43703	8.85511	7.45473	10.4578	6.33353	4.87109	0.182506	2.99651	6.36486	0.23471	3.37406
2.3033	7.37944	8.9362	5.46407	2.15463	7.41646	4.12972	10.6893	7.95586	3.00797	4.59307	5.65566	8.09103	10.5678	7.6044	9.65966	7.80942	4.35273	0.300591	1.82178	6.64344	1.44947	4.1274
2.44588	6.27345	9.8764	4.97296	1.63678	6.44814	1.77197	10.2124	9.58091	3.89607	6.01094	6.72013	5.57094	7.5213	8.06592	11.2842	7.20691	3.93783	1.23636	4.15216	6.89192	0.257154	6.85529
1.78294	7.92209	9.59761	6.27717	5.98454	7.40755	2.4521	12.3766	8.66573	3.61535	4.60161	7.57398	9.47448	10.3096	8.85263	12.177	6.73167	4.42999	1.12449	0.780263	7.05451	0.172086	4.0239
1.69447	6.92567	8.48531	4.8722	5.31678	6.44943	2.82965	9.67938	8.28451	2.54983	4.92759	7.16328	8.76141	8.14315	6.57322	10.5597	7.19243	4.50247	0.521926	2.74233	6.136	1.0619	4.57667
2.91133	6.79528	7.78344	4.14586	0.976507	5.16578	2.03954	8.98943	7.13523	3.56607	3.1544	5.34915	5.62013	8.4764	7.08678	11.3207	6.30783	3.45159	0.742038	4.71975	5.89491	2.86828	3.28759
2.69485	6.80241	9.26892	4.89993	1.94116	5.38492	4.60673	9.83204	8.73389	3.58341	4.93262	6.58058	7.41655	8.82312	7.69439	11.4955	6.77593	4.65936	1.39921	4.17284	7.12116	0.161364	4.94766
2.53471	7.27923	9.12236	4.8267	3.16899	6.44815	4.4701	9.12272	6.83739	2.78049	4.9642	4.95671	7.51212	9.74576	5.26102	11.1704	6.2667	3.03033	0.295434	2.37038	5.53336	0.491052	4.64778
1.44839	7.29643	9.20578	5.30199	1.01418	7.27664	3.32765	10.3591	9.05101	3.11234	4.65239	6.44917	8.12094	9.33637	5.53179	10.979	7.32721	4.55727	0.535718	3.76565	6.72017	1.93858	4.8561
1.35086	7.33196	10.0493	5.6326	6.86672	8.41292	2.16531	11.5007	7.88755	4.24397	4.17963	6.20046	8.20046	8.19516	9.81084	11.3103	7.35362	4.7083	1.17798	3.03673	6.2591	0.288694	4.58268
2.53318	7.2433	9.6759	5.37037	5.12984	6.47704	3.67038	11.5611	8.18648	3.37135	5.22887	6.50186	9.27265	10.1221	7.51569	11.1923	7.27794	4.21448	0.772544	2.49594	7.04802	1.6645	4.7427
1.32964	7.49189	9.22847	5.83724	5.91173	6.78799	3.48527	10.7544	8.12204	3.64948	4.08993	6.80128	7.97147	8.6275	7.67606	11.3209	6.82208	4.37592	0.916549	3.25214	6.31878	0.494222	5.16046
1.91967	6.5786	9.26899	4.73216	2.14431	4.80907	3.17507	11.177	7.29675	2.26465	4.52926	5.48257	7.0992	7.71546	5.93045	11.0648	7.08959	4.39211	0.251248	2.33686	6.39321	1.30464	3.717
2.49132	7.12429	8.37047	4.03426	1.03365	6.43494	7.61932	12.7263	7.84341	2.69635	3.26737	6.81372	7.29819	8.8652	5.0907	10.9956	6.17335	2.90354	0.452436	1.53664	5.93217	2.04001	2.53137
2.14215	6.79812	9.56327	5.62137	7.16546	6.97849	7.32616	10.8959	7.87677	3.26605	5.89264	7.4917	7.90939	8.20837	7.34116	11.1919	8.93381	4.32746	1.68239	2.31603	7.43372	1.82538	5.22289
1.56914	7.03488	8.68192	5.06938	4.76016	6.46764	6.1378	9.76855	7.76303	3.30385	5.28873	6.77604	7.39315	9.13447	8.15632	10.5835	7.11146	3.99617	0.706741	3.24889	7.28525	3.6012	4.34922
1.4628	8.31768	9.86798	5.48665	2.6403	7.43011	3.67197	11.7253	9.16173	3.27061	4.52998	7.69898	8.48047	9.29672	9.29531	11.4404	6.1067	4.91068	1.06385	2.6328	7.03504	2.0543	4.45051
1.41217	8.19569	9.60499	5.09635	7.01423	8.41708	4.87508	11.6237	8.24073	3.22106	4.67828	7.59235	7.24409	11.0641	8.05156	11.137	7.34162	4.71368	0.644381	1.64252	6.72104	0.335602	4.13065
3.46978	7.19429	9.01582	4.84019	4.00193	7.31765	1.32047	11.9775	8.75983	3.6482	4.84829	5.53818	9.00983	9.98339	6.42855	11.3239	7.27277	4.29538	0.844443	2.68729	6.67889	3.03045	4.78231
2.62544	8.2217	8.96047	5.01044	2.75344	7.0174	3.34856	11.7955	8.72178	3.74871	4.36497	5.35048	8.07346	8.15035	7.21568	10.9515	7.16209	4.4998	0.860172	1.73316	5.68756	2.87084	4.01288
1.99448	7.09804	9.84031	6.19939	3.78247	8.82905	6.64979	11.0643	8.40256	3.63486	5.20062	7.12512	8.19539	9.7868	9.74802	11.6343	6.69655	5.32791	2.04366	5.14638	6.74128	0.656639	5.08354
2.3841	7.45368	9.71007	6.01989	7.05808	7.63165	3.28069	11.4156	8.71666	3.59923	4.82452	6.04427	9.45422	8.53145	9.75853	10.7737	7.20302	5.07131	0.664914	2.52778	6.13997	0.0308062	4.23333
2.57853	6.78388	9.1823	5.25164	2.84676	8.23484	3.99966	9.88966	7.91109	3.45253	5.35003	5.2905	8.61422	9.46719	7.79196	10.8222	7.62996	5.92812	1.18204	3.17973	7.16972	5.77075	5.0664
1.86995	7.12919	9.88874	5.10784	5.82553	8.43208	2.76993	10.8383	8.37272	2.91124	4.26786	6.83435	7.6672	9.5809	8.90251	10.6937	7.62965	4.90691	1.63043	4.54107	6.90878	0.639933	6.11079
1.9346	7.76563	8.80654	5.3536	4.64829	6.89482	2.46758	10.9286	8.35957	2.35898	4.7339	5.26658	8.48626	10.2219	6.8897	11.3076	7.62751	4.98583	0.291389	2.76723	6.551	3.6915	5.52322
2.53434	6.9661	8.35505	5.05688	0.998301	7.58237	4.16336	12.852	8.14532	3.40233	3.9359	5.95089	8.35905	9.83235	7.15001	10.9581	7.01377	4.48936	0.619394	3.1427	6.37269	5.35461	4.54083
2.47955	6.57975	10.2039	5.2893	5.99046	8.78104	4.17344	10.0215	8.81484	4.21235	4.82154	7.48148	7.45046	9.46587	9.53946	10.9048	6.77447	5.18708	2.55388	4.09299	6.44099	2.88792	4.16781
1.10882	7.59349	9.12941	5.00548	2.79495	5.7181	2.63566	10.3544	9.05794	3.83381	4.40253	6.38851	7.27083	8.90027	5.54638	10.8896	7.59694	3.10099	2.19501	2.53121	6.62325	4.37247	4.88127
2.38265	7.36908	9.66666	5.29252	2.28573	6.52795	4.97915	8.04938	7.09293	3.26404	5.07526	6.06593	6.78596	10.5729	7.89358	10.3088	7.95791	4.25625	0.218745	5.06206	6.58438	1.42153	7.36236
2.50564	9.12353	9.2893	5.82152	3.39429	6.64941	3.2247	11.6269	7.70983	4.28947	4.89216	5.83017	8.91208	8.41636	7.62385	11.7144	7.13064	4.48066	0.0987902	3.52208	5.99942	0.573938	5.60595
2.56922	8.74496	10.2724	5.54133	1.97854	8.30584	5.4392	11.4277	8.11501	2.84698	3.75928	7.25646	7.51125	9.30653	7.87251	10.7228	6.93628	5.09961	0.747283	3.20791	6.63709	2.29907	4.71088
1.93632	8.04087	8.53391	5.10632	1.46862	6.78334	4.05616	10.56	8.17909	2.60706	4.65988	5.48991	7.38607	9.31761	5.18983	10.5197	6.89025	3.8015	0.52171	3.47282	6.23934	2.72635	4.76756
1.76007	6.62018	9.43982	4.99343	2.30377	6.14242	5.51471	10.4763	8.51916	3.16605	5.19871	5.36434	7.79581	8.04472	6.60536	10.8663	7.48284	4.7707	1.65228	3.51866	6.86889	0.351378	4.48404
2.98356	7.7913	9.56328	5.61217	2.83918	8.76545	6.50206	11.9263	8.72754	4.0759	4.42846	6.92263	8.17845	10.2524	8.65745	11.2923	6.94347	4.92665	0.573846	2.77979	6.56859	4.82986	5.36179
1.61316	8.24773	9.02872	5.09338	7.63344	6.64465	3.34132	10.4066	7.92722	2.78904	3.24719	5.95106	8.47723	8.86101	7.45702	11.0484	6.55431	4.15866	0.224361	3.27708	6.67971	0.459709	4.90385
2.63493	5.87154	9.09296	5.58353	6.52641	9.2418	2.84929	10.2428	7.31728	3.92477	4.02765	7.53901	8.10092	9.6353	9.42395	10.6589	6.30006	4.99071	0.512357	1.49904	6.03587	1.98939	3.90081
3.06033	7.09311	8.98897	5.22271	3.29256	6.42494	3.5349	9.62266	7.65733	4.31623	4.54599	5.22791	9.2186	9.28569	7.66226	10.4793	8.14233	5.07352	1.24922	3.2143	6.40628	2.18587	5.22557
2.23587	7.68757	8.75672	4.76641	1.48738	6.15289	3.9843	8.79767	7.61965	2.63609	4.02653	5.56566	6.70232	9.60424	6.7371	10.0869	6.88308	4.14378	0.590062	4.70667	5.79878	0.577028	6.06613
2.04203	8.6627	8.74312	4.67624	1.0829	6.30612	3.8415	9.39269	8.12356	2.17847	4.736	5.28587	6.44665	10.5974	6.31795	10.6523	7.05429	4.14556	0.463476	5.79029	6.21871	0.72502	7.03078
2.06973	8.00834	9.05159	4.88463	4.22076	6.73349	3.40915	9.9445	8.3888	2.81216	4.49534	5.81467	6.77129	9.61693	6.25355	10.6187	7.3713	3.88721	0.54976	3.98116	5.97761	6.55697	5.66968
1.91948	6.23197	8.94215	4.87967	6.33722	7.42886	2.11389	11.3379	8.05379	3.18295	4.77527	7.06648	7.60513	10.4934	7.89551	10.2458	7.62486	3.73267	1.17921	2.52124	6.35242	0.585774	4.18124
1.8969	7.86925	9.22024	4.96435	5.00875	7.72376	2.43716	12.6316	7.09432	2.76018	4.25691	7.10421	7.5427	11.2532	8.74187	9.9408	6.53824	3.66007	0.0969967	3.08551	5.28706	0.117165	3.71626
2.59279	6.7316	9.65944	5.44276	6.93019	7.87732	1.64854	10.3884	7.86007	3.46608	3.71124	6.52745	8.74799	7.48899	8.37543	11.3614	6.29168	3.69137	1.74524	1.59682	6.68641	1.29309	4.18616
2.58427	7.48964	8.75524	5.15501	0.963119	7.41061	2.91606	10.8166	8.56879	3.31597	3.85755	6.84083	7.72955	10.4205	6.10738	10.368	7.03048	4.18628	0.469492	3.33656	6.36592	8.78424	5.25943
1.85773	7.81005	11.5866	6.15269	5.87405	7.65079	2.78529	11.7828	8.96407	4.29996	4.30622	6.49827	7.8262	9.58103	9.01838	12.6767	6.33683	4.01189	3.26521	1.06986	7.20455	0.269077	3.80314
2.58488	7.09274	9.44974	4.80673	7.15959	8.68808	2.10904	12.4025	8.33854	3.37256	4.0419	7.26594	8.35645	10.3727	8.74545	11.3269	7.30946	3.63087	1.00416	2.24948	6.83408	1.20319	5.12806
3.70295	8.75546	10.4164	5.32338	4.61778	5.57624	1.87985	9.93358	8.05582	4.03934	5.75417	5.90393	6.81938	8.79876	3.93468	11.9695	7.3902	4.22042	0.251828	2.62628	6.3731	0.19867	4.82769
1.08387	7.39164	10.05	4.51439	6.35808	7.11562	2.08338	10.0471	8.03704	3.3145	4.1435	6.39028	8.73625	8.70843	9.28263	12.0633	6.45817	5.63081	0.881336	2.24923	6.28836	1.58204	4.99796
2.64065	5.26836	10.3048	6.55943	5.22981	7.63824	5.22173	11.3826	7.78541	4.09998	4.57851	6.6198	7.57072	9.38312	7.47167	12.0832	5.74433	3.50263	0.540386	0.636446	6.8202	2.90712	4.1641
2.22302	6.9541	8.75504	5.04903	4.16669	7.40147	6.07409	11.4035	7.25003	3.03067	5.02403	5.9271	8.38155	10.766	8.04479	10.7737	6.71209	3.14169	0.469762	2.67774	6.67746	1.20851	4.35135
2.50137	8.22501	9.52907	6.72886	5.34542	7.31317	4.77929	11.2128	8.57573	3.4328	4.38986	7.39838	8.26051	9.29866	6.24221	11.5998	7.09656	4.19726	0.408755	2.11599	6.11311	1.92985	4.25085
2.28661	8.01694	8.26098	6.39131	2.29934	6.66584	2.77468	11.9735	6.7973	3.56919	5.26645	5.65698	8.18485	8.04975	6.09449	12.4762	7.03013	4.95136	1.90271	0.33036	6.96617	0	2.98769
2.90574	4.20263	9.36622	5.07042	0.477913	5.02082	5.91763	9.85025	8.41183	4.13876	4.34979	7.47341	6.97784	7.89727	8.56776	12.0883	6.33531	4.51804	1.07402	1.32	7.30941	0.0653865	6.19007
3.11584	7.03453	8.67072	4.77758	2.35076	8.0382	4.01007	12.4839	7.46434	3.38912	4.25664	7.15413	7.18485	10.8405	7.15651	10.7299	6.54146	4.33381	0.386499	0.603602	6.62875	4.27783	4.3925
2.14502	6.64423	8.44408	5.45763	1.98066	6.48081	5.7104	9.16051	8.1895	3.48136	4.60014	6.82709	6.51969	9.60683	7.3619	10.5878	7.12216	4.15697	0.431242	3.51611	6.3233	1.74512	7.29481
1.8266	7.56428	10.6161	5.50382	1.78128	6.55522	2.52683	11.1125	8.48118	5.39616	4.59285	7.20329	7.67615	11.1616	5.36052	11.5526	7.04885	3.05385	0.970894	0.737391	6.74813	0.306809	3.90193
1.25012	6.71591	9.17556	4.74082	5.89181	8.24203	3.84368	10.9639	8.48928	4.26884	5.2396	5.34675	8.28843	9.27035	8.87914	11.2923	6.61103	3.79639	1.49913	1.93729	6.48469	0.137634	4.95321
2.18762	7.55415	9.41571	5.12738	2.42548	6.32394	3.55635	10.5157	8.08774	3.08497	4.59313	6.80601	7.68194	10.739	6.66179	11.1113	6.67808	3.30878	0.654835	0.875513	6.22616	7.30821	5.11213
1.96457	7.40949	10.0223	5.57412	5.95219	8.45233	1.63847	11.2366	7.5545	3.4965	5.13714	7.77362	8.52987	7.68581	7.9546	12.1546	6.79307	4.34657	1.33974	1.22408	6.76126	3.42775	5.861
2.4162	6.03648	9.1585	5.15587	2.32238	8.56096	4.22214	12.5971	8.07	2.99049	4.42264	7.80529	8.09086	11.6511	8.54088	11.1323	7.46253	4.76227	0.53945	0.41489	6.35259	1.28703	5.05576
2.19127	8.66589	11.0487	5.88237	2.0327	8.06328	4.94728	10.9222	8.04873	2.88613	4.69456	6.13446	6.52175	9.69846	6.34307	11.3259	7.4546	4.20333	0.878888	2.54492	6.36377	1.23928	4.46734
2.7092	6.26734	8.79293	5.30959	3.35778	8.08034	4.76219	12.407	7.41946	3.26837	5.0464	6.29283	7.55501	10.8165	6.7109	11.3129	7.67573	4.72159	1.227	1.59135	6.82628	3.58914	4.99718
1.94624	5.73367	9.09506	5.66408	6.00069	6.62055	3.6914	11.586	7.99178	3.70844	4.49658	6.78491	7.1202	10.6034	8.55466	10.9984	6.98156	3.45656	0.572836	0.629377	6.64324	4.87876	4.96535
3.79795	7.43003	9.62552	6.09477	2.45798	8.6324	0.948405	10.9137	8.46266	4.15032	4.24793	5.85694	8.41666	9.88771	5.88943	11.6409	5.19939	4.31842	1.66677	0.752277	6.44507	6.11833	4.00493
1.52832	6.23369	10.037	5.824	6.95645	7.91287	3.73988	11.6625	8.3188	3.22499	4.56991	6.99932	8.2258	10.6789	12.0648	11.5176	5.80241	4.98776	1.52317	1.23619	6.29745	5.67605	4.51164
2.58351	8.10671	9.67594	5.2113	2.76884	6.29436	4.3441	11.3023	8.35775	3.85228	6.02565	6.36209	8.08337	10.6087	5.4851	11.2068	7.19862	4.59216	0.278619	1.73706	6.16138	0.119536	5.9373
2.04516	8.64978	9.71738	5.60064	0.664061	6.98573	4.33842	11.595	8.0357	2.70237	4.53249	7.0318	8.21445	10.0639	6.35799	11.6081	7.39095	3.84687	0.621296	3.06495	6.05006	3.51092	5.14975
2.55209	5.25227	9.5775	5.10716	0.80876	5.4602	6.4144	8.91442	7.84013	3.78136	4.61963	7.89273	6.42588	7.93911	9.29975	11.4297	6.38978	3.97737	1.58862	3.77191	6.91686	0.453316	4.95643
2.11164	6.71937	8.76326	4.91879	4.61556	7.54371	4.91363	11.5309	8.04413	2.76526	6.05157	6.88603	8.07031	10.6366	7.52258	11.1627	6.90369	4.49958	0.164317	1.64121	5.57241	0.287037	3.50428
3.40552	6.94469	9.98872	5.4773	3.66327	7.88045	2.5076	10.9295	8.12277	3.86939	4.11537	5.73162	8.06466	8.97535	7.08567	11.9654	6.36474	4.18223	0.467605	2.24988	6.00464	0.571378	4.64831
1.87177	7.88232	9.73395	5.88305	4.88724	5.79443	5.90275	11.4647	9.56907	3.01623	5.19783	4.93447	6.80035	10.5483	6.74524	12.4646	7.03849	2.78318	0.263517	5.16211	6.95575	0.0853535	5.33519
2.71805	5.56023	10.201	5.42957	7.34553	8.60586	3.10737	9.25533	9.14762	4.37451	5.17598	6.36686	8.49371	10.1558	10.0642	11.3754	7.57129	4.60201	1.47851	2.56047	7.261	0.426862	4.96939
2.15423	7.23688	9.75544	5.47591	3.3822	8.27611	5.29613	11.696	7.75444	3.63559	5.31815	7.2171	7.9984	10.4511	10.1809	10.7395	7.29445	4.96416	1.52199	2.08651	6.64923	7.13369	5.47797
1.47506	6.3516	9.51813	5.52676	2.13175	7.83715	4.43641	11.606	7.59506	3.66542	4.03875	6.6253	7.23444	10.7285	6.28397	10.9913	6.05306	4.6244	0.120332	1.34537	5.4645	0.722488	4.3411
3.58858	6.7196	9.01012	5.13308	2.99448	7.05375	5.72133	9.10028	8.6193	3.90422	4.18853	7.59833	6.39571	8.97542	8.06139	10.447	6.38473	4.68332	1.5195	0.679905	7.13983	1.61434	5.08237
1.84461	7.86752	8.90016	4.806	5.11131	7.01213	4.12143	10.5806	7.6686	3.36057	3.86731	6.95159	7.68467	9.97471	7.90559	10.4632	7.49172	4.16144	1.48943	3.51126	6.60919	4.56877	5.9148

## Sheet: LUSC-TCGA
sample_id	ZNF419	CDKN1A	HSPA5	EMC2	SLC7A11	NFE2L2	MT1G	HSPB1	GPX4	FANCD2	CISD1	FDFT1	SLC1A5	SAT1	TFRC	RPL8	NCOA4	LPCAT3	GLS2	DPP4	CS	ALOX15	ACSL4
TCGA-18-3406-01A-01R-0980-07	2.54626	7.95959	8.76002	4.95431	0.95132	6.69883	4.71483	10.4355	7.24276	1.69617	4.78267	6.15763	5.3462	10.1538	6.12196	11.0899	7.67932	2.91109	0.135988	1.57185	5.14073	0.647889	4.89257
TCGA-18-3407-01A-01R-0980-07	1.58401	7.18601	9.34805	5.07756	5.69284	8.08821	2.52124	10.5525	7.18154	3.03692	4.86551	7.49813	7.95203	9.79223	8.12109	10.985	7.31137	4.36576	0.438605	3.61005	5.97754	6.31813	6.0274
TCGA-18-3408-01A-01R-0980-07	2.33342	6.7334	9.41578	5.92774	6.57334	8.36751	1.43443	5.95209	8.55168	2.69992	5.54758	6.8609	7.33985	9.42168	7.0935	10.1774	8.19826	4.77311	0.944998	3.16536	6.74866	4.23901	6.36866
TCGA-18-3409-01A-01R-0980-07	2.58929	6.79127	8.91346	4.89997	1.22929	6.46704	4.90837	9.16805	7.3424	2.65161	4.62173	6.1159	5.70186	8.2842	5.44381	11.4671	7.9758	4.11533	0.43077	5.75768	5.9908	2.97143	6.02544
TCGA-18-3410-01A-01R-0980-07	2.49646	8.30675	8.9937	5.2493	2.26699	6.48637	5.60228	9.08366	10.2294	4.09907	6.44163	8.35809	5.63602	8.33434	8.59797	11.2312	7.48212	3.83566	2.03054	3.85811	6.82443	0.608012	4.63921
TCGA-18-3411-01A-01R-0980-07	1.92303	6.77127	9.63766	5.02888	5.63661	7.20059	4.70197	10.312	8.17152	3.58145	5.27637	7.38236	8.15284	8.42975	9.18412	12.1405	7.78887	4.46833	1.65235	1.36645	6.14166	8.26059	5.71541
TCGA-18-3412-01A-01R-0980-07	1.2322	7.23139	4.59369	5.27002	5.27002	7.60769	3.72848	11.6944	8.03883	3.34674	5.15871	6.66288	8.2568	9.60931	8.90003	12.0031	7.35043	5.531	2.5077	1.83866	6.53369	4.06782	7.13989
TCGA-18-3414-01A-01R-0980-07	2.87174	7.94596	9.05943	5.55532	1.8759	7.31169	4.30938	11.2725	9.02208	3.58684	5.52587	7.85157	7.86097	10.3382	7.04627	11.5009	8.33361	4.82587	0.862636	2.12439	6.73467	5.77765	4.8513
TCGA-18-3415-01A-01R-0980-07	1.31736	7.72472	9.6047	5.06123	5.41999	7.70677	3.09095	10.9332	8.50397	3.20902	5.75886	7.52267	7.62814	9.3208	9.00863	11.0219	7.84491	4.41341	0.603829	2.7578	5.96013	3.19786	5.25224
TCGA-18-3416-01A-01R-0980-07	1.62928	6.63724	5.23371	5.23371	6.52755	8.86827	2.40247	10.9402	8.10542	3.8393	6.04394	7.37056	8.0844	10.6008	9.30102	11.1341	7.89404	5.27736	1.62716	1.09151	6.74832	0.124273	5.44795
TCGA-18-3417-01A-01R-1443-07	1.42338	7.9583	9.9128	4.66073	2.08594	6.22685	2.30283	10.9356	8.5559	2.59405	4.88333	6.53362	8.28765	8.11077	7.01937	11.855	7.49228	5.92635	1.10184	2.04428	6.29336	0.0533732	5.19525
TCGA-18-3419-01A-01R-0980-07	0.553678	6.57657	9.03651	6.06925	3.11685	6.67088	3.3313	11.4047	8.29778	3.99069	4.97503	6.34185	7.84831	9.9904	9.27136	10.8077	7.96215	4.46305	0.903951	0.894311	6.49967	2.20396	4.66787
TCGA-18-3421-01A-01R-0980-07	1.81249	7.21912	8.59204	5.46023	2.59957	6.95929	6.33618	10.1328	8.89823	3.84315	6.119	7.80671	7.94081	9.69129	10.17	12.9666	7.52441	3.71118	0.721373	1.74938	5.90341	2.84048	5.34836
TCGA-18-4083-01A-01R-1100-07	2.51697	6.0827	8.97148	4.72841	2.58851	8.11254	3.75033	10.9287	7.91077	4.42044	4.3048	5.97569	7.57179	7.79421	9.39369	10.7002	6.49892	4.19582	2.15036	4.70668	6.93406	0.554453	5.01802
TCGA-18-4086-01A-01R-1100-07	1.51559	7.49662	8.88995	4.91379	6.12217	7.6989	4.04644	11.0789	8.5876	3.08148	5.2541	7.55147	8.03833	9.15327	9.04843	11.1582	7.54051	4.38075	1.29604	2.28609	6.78487	1.04221	5.3445
TCGA-18-4721-01A-01R-1443-07	1.69947	7.38806	9.55925	5.14771	5.66097	8.13144	2.6534	9.75734	8.28146	3.71107	4.81184	7.27305	8.353	9.04795	7.66771	11.1675	7.51412	5.84886	2.34286	3.59262	6.73012	0.32173	5.1813
TCGA-18-5592-01A-01R-1635-07	0.958455	7.28907	9.90336	5.21438	4.30629	7.99098	2.15411	10.5173	8.2129	3.79433	5.75849	6.15286	8.27264	7.7887	8.47448	11.4811	7.65424	6.25976	0.467453	1.88324	7.54054	0.148766	5.02579
TCGA-18-5595-01A-01R-1635-07	1.5149	7.87325	9.24549	5.88449	7.76844	7.69849	2.90781	11.7255	8.24826	4.933	4.95149	7.33372	8.76924	7.92008	9.4039	11.9168	7.78804	4.89861	2.46619	2.43995	7.35504	3.50933	4.29819
TCGA-21-1070-01A-01R-0692-07	1.64693	7.58941	9.23117	5.19101	2.35419	6.80211	3.99155	10.0379	7.00304	3.07476	5.35067	5.69471	7.97758	9.7443	6.76006	10.5463	8.07698	4.87242	0.775041	4.20255	6.9437	2.54989	5.22213
TCGA-21-1071-01A-01R-0692-07	2.39188	7.0515	9.99123	5.59312	6.93611	7.64625	3.65533	9.74161	8.17598	4.0093	5.55909	7.26874	8.82755	10.7305	8.31719	10.1688	7.62342	4.50498	0.206299	2.81053	6.8389	0.753343	5.76694
TCGA-21-1072-01A-01R-0692-07	2.65415	7.43886	10.4764	5.51228	6.70442	8.05674	1.73124	10.0392	8.28202	4.25688	4.75092	7.44844	8.03044	10.4678	10.1283	11.0876	7.44247	4.59628	0.520266	2.08092	6.86171	0.511968	6.37284
TCGA-21-1075-01A-01R-0692-07	2.04627	6.60441	9.0134	6.16868	7.16872	8.39492	1.7735	10.8931	8.50684	4.29681	5.1061	7.73306	8.44451	8.97404	9.22062	11.6496	6.89751	3.68433	0.887233	2.14898	6.49232	0.31295	4.87771
TCGA-21-1076-01A-01R-0692-07	2.58715	7.5783	9.28585	5.8615	5.1639	7.52235	3.25408	10.0537	8.16909	3.20215	4.10044	6.28838	7.22732	9.96019	9.56033	10.3622	7.7546	4.19387	1.00118	3.84863	6.46878	0.622785	5.67078
TCGA-21-1076-01A-02R-0692-07	2.41572	7.8137	9.30505	5.95651	6.22754	7.5953	4.40534	9.88687	8.19936	3.028	4.09718	6.29962	7.33376	9.91169	9.84332	10.0889	7.87992	3.90126	0.681055	3.80509	6.48761	0.636168	5.70577
TCGA-21-1077-01A-01R-0692-07	1.63726	7.14721	9.57151	4.60514	4.61412	8.2705	5.04683	11.2891	8.47836	3.16003	4.55279	7.45078	7.6129	9.37301	8.92207	11.6974	7.37141	4.28275	1.47891	2.9064	6.79575	1.0017	5.12961
TCGA-21-1078-01A-01R-0692-07	2.2259	8.85359	8.6549	4.75447	1.1602	7.09524	0.955134	11.3164	8.55634	3.02932	3.95216	7.47096	6.892	7.1708	4.94666	12.0471	7.90606	4.5569	0.983779	0.610798	6.94499	1.4993	4.39626
TCGA-21-1079-01A-01R-0692-07	2.28493	9.14621	9.1512	5.04922	2.10162	6.42717	3.09487	10.9735	8.32919	2.33683	4.45429	6.39504	8.1436	8.21128	6.97562	10.4779	7.37088	4.26521	0.0679446	3.64784	5.86514	0.0553463	5.74267
TCGA-21-1080-01A-01R-0692-07	1.59489	7.15127	9.44729	5.47643	1.57215	7.25398	8.59372	11.044	8.792	3.56457	5.10061	5.76515	7.81105	8.72927	7.94871	13.2226	8.31869	4.94487	1.00868	1.53315	7.03182	1.05471	4.53458
TCGA-21-1081-01A-01R-0692-07	2.8345	7.17279	8.96349	5.11069	4.35712	7.10647	4.22598	11.9246	7.72444	4.21329	4.16973	6.52745	9.14203	8.36324	8.36318	10.8499	6.38038	5.01472	0.583685	2.94471	6.67748	3.32753	3.64416
TCGA-21-1082-01A-01R-0692-07	2.80596	7.93802	8.65087	4.75785	1.8714	6.20249	3.85044	10.5047	8.58839	3.09684	3.98109	6.95523	8.18307	9.52027	8.01533	10.4869	6.30845	3.99327	0.586441	2.68397	6.43632	3.22999	3.45217
TCGA-21-1083-01A-01R-0692-07	1.81346	6.30525	8.28821	5.33616	5.58746	6.46233	4.8568	9.91523	8.49231	4.12887	5.4687	6.15284	7.68979	9.30637	8.56091	11.2925	7.80768	4.78945	1.98066	1.76824	7.65756	0.250279	6.32503
TCGA-21-5782-01A-01R-1635-07	1.8979	8.28876	9.71623	4.62009	1.68515	6.12044	5.53043	11.2665	8.58932	2.9019	4.39798	6.01767	8.06577	9.03887	7.99134	11.7098	6.24524	4.63623	0.986718	2.81326	6.12129	4.41751	3.26847
TCGA-21-5783-01A-41R-2187-07	2.70276	7.94632	10.2236	5.89307	1.93305	6.04961	5.02664	10.8199	7.58478	4.15749	4.21246	5.78595	6.81654	8.53353	7.96386	11.7498	6.84812	4.26289	1.7627	3.09025	7.05933	0.619891	5.57937
TCGA-21-5784-01A-01R-1635-07	1.65994	7.63655	9.52297	5.38082	0.512523	7.29151	4.93291	12.9916	9.01314	2.06373	4.97584	6.91707	8.56754	10.1411	5.786	11.2353	6.86056	3.49317	0.537626	2.96592	5.4121	5.07469	4.53774
TCGA-21-5786-01A-01R-1635-07	2.41363	7.48586	9.24597	4.98501	1.27404	5.2788	4.48297	11.067	8.25212	3.16288	4.83008	7.18844	7.93907	8.6238	7.72539	12.2088	7.58783	4.82823	0.301944	4.92474	6.51674	1.23181	4.53328
TCGA-21-5787-01A-01R-1635-07	1.57741	6.36215	9.21524	5.77502	2.67832	5.25698	6.82666	8.31776	9.34584	3.18905	5.04517	5.03971	8.74786	8.65351	6.51941	11.7933	7.47967	2.92034	0.137642	2.88034	6.90955	1.69271	5.19173
TCGA-21-A5DI-01A-31R-A26W-07	3.10721	7.70726	9.24422	5.70057	3.184	7.97613	2.76751	12.0436	8.7598	2.89746	4.74309	6.29342	8.16504	10.9866	8.15189	11.1551	7.43419	5.03426	0.536974	1.26802	6.16353	0.165946	5.56961
TCGA-22-0940-01A-01R-0692-07	1.30518	6.62535	9.78164	4.65041	4.21067	7.17629	2.31428	12.405	7.54428	2.86735	5.09868	6.58646	7.59947	10.4561	8.19564	11.1002	7.35992	4.50718	0.407192	3.19129	6.94642	2.48448	5.26375
TCGA-22-0944-01A-01R-0692-07	1.77169	8.60266	9.35142	5.30311	5.11175	8.33409	3.06717	11.6038	8.50561	2.73337	4.70783	8.25615	6.90629	9.56555	8.66382	11.5012	7.14594	3.73266	1.57349	4.8459	6.69236	1.8778	4.89193
TCGA-22-1000-01A-01R-A32Z-07	1.53086	7.68221	9.21532	4.70905	1.06254	6.87941	3.73159	11.3215	8.23516	2.29126	4.41052	6.83074	7.35027	9.28825	5.79788	10.5207	7.22898	3.91185	0.231439	4.10897	5.88157	3.68245	5.42953
TCGA-22-1002-01A-01R-0692-07	2.1706	8.04733	9.23322	5.02729	4.39048	7.20106	5.03104	10.0854	7.53211	3.12942	4.55441	5.68938	8.00921	8.90435	6.75289	10.8026	7.51319	4.66408	0.674335	4.68383	6.76061	1.57538	5.37796
TCGA-22-1005-01A-01R-0692-07	1.40319	5.96817	8.59435	4.12787	1.39865	5.2833	2.95406	8.35408	7.42082	2.28837	3.61356	4.91211	6.71188	9.17634	4.03167	10.1995	6.34216	2.72465	0.351657	3.41416	5.29963	3.91371	4.79762
TCGA-22-1011-01A-01R-0692-07	2.30133	7.48301	9.51986	4.99046	1.426	6.72196	5.04566	10.8647	7.72035	3.16325	3.90472	7.40615	7.72013	9.28405	5.67521	10.2453	7.34406	4.76679	0.507351	1.95586	5.97618	2.20756	5.48978
TCGA-22-1012-01A-01R-0692-07	0.559137	7.76057	8.61198	5.05934	2.95503	7.04899	7.64114	11.2113	9.15504	3.68351	4.70395	6.74951	7.83833	9.26516	9.27033	11.9285	6.63382	4.36437	2.43503	2.74807	6.54207	0.38885	4.24474
TCGA-22-1016-01A-01R-0692-07	3.33293	7.758	9.25937	5.21312	2.24154	6.57691	5.00731	9.13861	7.46253	3.51233	4.1341	6.10465	6.77883	9.37071	7.05287	11.256	7.9178	4.88062	0.95468	5.23083	6.86639	2.63444	6.18764
TCGA-22-1017-01A-01R-0692-07	2.19855	6.64461	10.1116	6.35838	2.79571	6.46035	3.7599	10.4353	8.67255	2.83308	3.91304	6.26301	7.04671	9.37376	5.98794	10.6645	7.59861	4.42969	1.07133	9.08147	7.58398	2.30296	5.54893
TCGA-22-4591-01A-01R-1201-07	1.69132	6.94435	9.73289	5.3791	6.50471	7.82865	3.23521	10.0734	8.38783	3.61619	5.19828	6.96517	9.05712	8.46872	7.09125	11.043	10.0804	4.1991	1.93834	2.80351	6.44021	8.00116	5.13714
TCGA-22-4593-01A-21R-1820-07	1.89517	6.81801	9.26057	4.70534	2.46475	6.16796	3.13708	11.1932	8.1946	4.57545	4.50356	8.68367	7.16604	7.99764	9.87869	11.3998	6.96818	4.44806	0.952331	3.56826	6.92903	8.22803	6.84024
TCGA-22-4594-01A-01R-1201-07	1.27912	5.59784	9.09309	5.15468	4.65355	5.55709	4.78508	8.36674	8.12505	2.66223	5.21552	5.92183	6.53645	8.08359	5.85499	10.8648	7.75914	3.19603	1.05008	6.10679	6.13785	1.09851	4.3815
TCGA-22-4595-01A-01R-1201-07	2.57771	8.33159	9.36941	4.59483	1.93521	5.37433	3.08923	9.43511	8.26606	3.09499	3.78988	7.1344	6.90858	8.65697	7.88934	10.2276	7.06986	5.01644	1.0025	3.36076	6.43506	1.90821	4.44341
TCGA-22-4596-01A-01R-1201-07	1.82097	7.40665	9.19541	5.77376	2.44007	5.91017	4.79052	10.7665	8.83748	2.41928	4.60846	5.86307	7.2243	9.31068	5.693	11.8394	7.75507	3.70881	0.313727	6.2699	6.43407	4.24491	5.90569
TCGA-22-4599-01A-01R-1443-07	2.5467	5.52294	9.39211	4.58863	3.82624	7.84763	2.60896	9.29765	8.59474	3.01249	4.33351	7.37794	8.82386	9.28288	9.50872	10.8871	7.16543	5.15115	1.0139	2.41827	6.14293	4.07133	5.63975
TCGA-22-4601-01A-01R-1443-07	2.65934	8.59531	9.75269	5.1997	6.40218	9.96109	3.42463	10.3663	7.66284	3.1231	4.02247	6.55303	8.58504	9.46394	6.82396	10.7154	7.25317	4.12101	1.45089	2.70286	7.15087	1.60237	4.17302
TCGA-22-4604-01A-01R-1201-07	1.90607	8.06932	9.52096	4.79608	2.67921	7.20744	6.84347	10.1333	8.33271	2.43758	4.44875	6.06404	7.72765	8.82439	8.25354	12.1454	7.52108	3.99505	2.9798	3.25498	7.35919	0.828415	4.92127
TCGA-22-4605-01A-21R-2125-07	1.3464	8.28788	9.10297	5.59024	6.53516	7.88498	4.95965	10.8298	8.42885	2.37214	4.66072	6.41077	8.40921	9.70021	7.13229	10.5004	7.47487	4.1501	0.400662	3.87961	6.12878	4.16822	5.10577
TCGA-22-4607-01A-01R-1201-07	2.00941	8.62185	8.08135	4.68645	1.91148	7.0913	5.07618	10.7071	8.51511	2.14161	5.66758	7.47473	7.84561	10.8048	6.83262	11.4709	7.60517	3.81768	0.670649	1.75046	6.54842	3.95466	4.62967
TCGA-22-4609-01A-21R-2125-07	1.72849	7.54743	9.61265	5.0927	2.99645	7.86321	4.17066	10.8309	7.49055	2.79857	3.83558	6.51014	7.36444	9.12912	6.98093	10.8407	7.75836	4.0939	0.495664	4.41388	6.46727	2.20324	6.17159
TCGA-22-4613-01A-01R-1443-07	1.90183	6.54771	8.76256	4.96725	2.81705	8.47731	3.76715	10.5171	8.71577	3.58412	4.31208	6.79924	7.39905	8.86214	9.47954	11.8177	7.1416	4.8834	2.76835	1.90675	7.15333	5.56381	4.94294
TCGA-22-5471-01A-01R-1635-07	1.85838	7.16197	9.44758	4.73614	2.56627	7.23001	3.29298	11.2492	9.05238	3.37831	4.8819	5.75673	8.0284	9.01452	6.50953	11.0384	7.68052	5.25064	1.47904	1.74151	6.66221	0.674108	4.62193
TCGA-22-5472-01A-01R-1635-07	1.78095	7.79462	9.07263	5.55116	1.08435	8.52692	4.46288	11.1786	8.58684	2.86199	4.97204	6.68875	8.20139	10.6838	6.66795	11.1914	8.45817	5.17825	1.11092	4.53812	6.83812	8.66482	5.7887
TCGA-22-5473-01A-01R-1635-07	2.12221	6.96093	9.39749	5.11832	6.37641	8.55947	2.89901	11.8679	8.90497	3.55119	4.99323	7.10835	8.59745	8.80218	10.0359	11.513	6.37611	5.63589	1.19836	2.98038	6.6236	2.91103	4.50053
TCGA-22-5474-01A-01R-1635-07	1.66199	6.88718	9.41514	5.31911	5.65761	8.00385	3.72144	10.729	8.2738	3.50163	4.48293	7.73516	8.21768	8.984	8.83754	10.8906	7.4238	4.36288	1.22277	1.684	6.65454	4.49034	4.47252
TCGA-22-5477-01A-01R-1635-07	2.96365	6.17784	9.73435	4.69407	7.28809	7.9176	2.42436	9.9309	8.34575	4.03911	5.37054	6.71874	8.87865	8.7423	9.58233	11.1214	7.57426	6.07023	2.48921	2.09425	7.58891	2.13588	5.67651
TCGA-22-5478-01A-01R-1635-07	2.39884	8.27737	9.766	5.48438	2.19547	6.04436	2.98733	10.5822	8.83523	3.08965	5.24153	6.31166	8.11701	9.11302	6.93429	10.7044	7.46755	4.19539	1.35818	2.45078	6.38335	6.25916	5.02704
TCGA-22-5479-01A-31R-1949-07	2.01642	6.91587	9.75731	5.23054	5.86743	8.05497	4.34239	11.6647	8.64232	3.59492	4.55425	7.45206	8.38817	8.19918	8.85337	11.7126	6.22763	4.58791	0.202481	1.91191	6.05918	4.901	5.47785
TCGA-22-5480-01A-01R-1635-07	2.38813	7.22678	9.68415	4.76041	1.75466	6.1018	5.42384	8.99256	9.24276	3.4852	4.65105	6.59005	6.73566	7.57268	6.8309	11.925	7.40735	4.08465	0.871504	3.27605	7.3963	0.208216	6.86091
TCGA-22-5481-01A-31R-1949-07	2.56619	7.03802	8.07745	5.53047	2.96984	5.81461	8.15738	7.64926	8.48275	3.69676	5.17439	6.54906	6.8771	7.03219	4.85831	12.3691	6.50789	3.11713	1.18896	1.334	6.6641	0.0685415	5.13011
TCGA-22-5482-01A-01R-1635-07	1.89892	8.62114	9.65482	5.58443	6.08063	7.98669	2.88474	11.8764	8.70414	2.46228	4.92005	7.60324	8.52027	8.72673	8.81546	11.7305	7.40413	4.77416	1.04399	1.93544	6.85182	0.189915	4.42469
TCGA-22-5483-01A-01R-1820-07	2.13846	6.62859	9.62092	5.46489	6.19432	7.05163	5.19216	8.4137	8.25483	4.18415	4.22911	8.05087	9.80744	9.86613	8.25928	11.1034	6.8063	3.45597	0.366869	1.78126	6.78645	3.00231	5.53665
TCGA-22-5485-01A-01R-1635-07	2.23176	7.29571	10.2878	5.81615	6.2582	7.06873	3.83386	10.907	9.73025	3.72449	5.55707	7.00106	10.2688	7.90553	8.51144	11.4216	7.41872	4.70235	1.04863	3.34509	6.96232	1.0511	4.4733
TCGA-22-5489-01A-01R-1635-07	1.76489	6.7258	9.58115	4.49758	1.26216	6.16348	4.68536	9.3116	8.52861	3.97594	3.86277	7.34248	7.12867	7.37419	6.65827	11.2431	7.09241	5.06159	0.510839	3.11343	6.4083	0.921249	5.70493
TCGA-22-5491-01A-01R-1635-07	2.04256	7.05521	9.27928	5.10384	2.54779	8.61847	4.58666	12.1865	9.02812	3.51442	5.9872	7.27999	8.80795	11.2338	10.5242	11.4244	7.63328	4.99356	2.08394	0.715011	6.94475	6.17366	4.39263
TCGA-22-5492-01A-01R-1635-07	2.43821	6.80705	9.40396	5.63215	2.8467	6.96812	4.11158	10.7165	8.62077	2.93274	4.80253	6.31243	7.59082	9.43104	7.0023	10.5106	8.5703	5.12097	0.595249	3.39411	6.888	10.7407	5.52226
TCGA-22-A5C4-01A-12R-A27Q-07	3.8035	7.2572	8.84555	5.5957	4.38552	5.71653	4.93996	9.23358	8.94334	3.90955	4.9513	6.2765	8.36796	8.95618	6.89852	11.0697	8.05741	5.34595	0.311993	2.54459	6.72436	0.510174	5.21348
TCGA-33-4532-01A-01R-1201-07	1.82922	6.16438	9.221	5.1892	5.19232	6.49043	3.71095	10.6451	7.60782	3.88408	4.95079	6.65276	7.86044	8.35539	9.34553	12.5715	7.34001	4.70165	1.63501	2.32833	6.79845	4.88572	5.2955
TCGA-33-4533-01A-01R-1201-07	2.06505	7.22127	10.212	4.25488	1.48764	5.46488	5.06157	9.66572	7.82502	3.26607	6.28422	5.92763	6.77867	9.77822	7.58148	11.3816	8.71454	3.77381	0.554576	2.59079	6.63747	1.21252	5.28578
TCGA-33-4538-01A-01R-1201-07	1.86194	7.54905	9.37557	5.34389	7.20776	8.69614	3.06498	9.93377	8.55279	4.19025	5.32094	7.34508	7.78092	9.61395	9.46734	10.7048	7.78876	5.13196	1.17551	3.36847	7.09574	3.65796	5.69319
TCGA-33-4547-01A-01R-1201-07	1.65711	6.52573	8.98928	4.87767	3.18848	7.64171	6.07469	10.8487	8.30365	3.35955	5.45885	6.31735	8.21859	10.158	10.0642	10.8667	7.84311	4.66286	0.921916	3.0697	6.57863	6.15067	5.81816
TCGA-33-4566-01A-01R-1443-07	1.54537	6.89713	9.09863	4.90627	4.85375	6.24372	2.80387	8.40317	8.35333	4.19264	6.39976	5.13606	7.55359	8.5395	7.29253	11.9132	7.97589	4.59152	0.670002	0.902041	6.00188	0	6.99896
TCGA-33-4582-01A-01R-1443-07	2.44357	5.78344	9.2809	5.07502	2.56271	7.17125	3.14137	11.5087	8.53059	2.74627	3.52515	6.27757	7.80999	7.7826	7.23374	11.4523	7.06322	4.44038	0.481581	1.45275	6.74168	1.61342	4.3185
TCGA-33-4583-01A-01R-1443-07	1.25311	7.51697	9.39748	5.20508	5.06219	7.9024	2.3172	10.637	7.30193	3.45945	5.44385	7.82154	8.78478	9.10586	8.39685	11.4454	7.89175	4.59448	0.679198	2.07246	7.08838	2.55188	5.09115
TCGA-33-4586-01A-01R-1443-07	1.97629	7.43046	10.1541	5.29775	5.81622	7.63385	2.67589	12.1391	8.11098	3.41638	4.99141	6.90312	8.34013	8.91311	9.7112	11.1052	7.27174	4.76516	1.84936	3.07841	6.75599	1.12938	5.40856
TCGA-33-4587-01A-11R-2125-07	2.81871	6.82602	10.1848	5.63907	1.63281	7.325	11.8819	9.38497	7.61408	4.23228	4.55171	8.24272	5.8928	8.94375	7.67015	10.6636	6.86152	3.72391	0.695676	1.42393	6.88306	1.53217	5.25053
TCGA-33-4589-01A-01R-1443-07	0.762915	7.05286	8.67863	4.82532	4.05897	5.19273	4.11116	10.6344	7.44342	1.81181	5.2242	5.3497	7.15696	9.37198	6.96146	12.5559	6.75489	2.78145	0	2.37575	4.8367	0	5.4361
TCGA-33-6737-01A-11R-1820-07	2.17318	7.09749	9.15831	5.42741	5.77085	6.50991	3.10651	7.54204	8.0467	3.21634	4.83157	5.09945	7.87687	9.58415	6.81453	12.1352	6.66708	3.90333	0.105356	3.31561	7.06287	0.0649947	5.39034
TCGA-33-6738-01A-11R-1949-07	1.48426	6.54377	9.14549	4.54664	5.6518	6.86561	2.81593	11.3335	8.39558	2.20166	4.47763	5.19397	8.69061	8.23907	7.01964	10.4286	5.7742	3.3548	0.213601	1.63729	5.41719	2.5696	3.19765
TCGA-33-A4WN-01A-11R-A262-07	1.87638	7.02298	9.65166	4.78531	5.42039	7.13685	1.86996	12.3443	7.65873	2.89363	4.82292	7.49488	8.14742	10.3593	8.8985	10.8648	6.61328	2.96637	0.381042	3.17123	7.00303	2.3865	3.82849
TCGA-33-A5GW-01A-11R-A27Q-07	2.21927	6.99042	9.37018	4.84141	5.34006	8.92825	4.53729	12.2367	8.21634	2.49977	4.78795	6.69312	9.00254	11.1835	7.56148	10.7357	7.05389	4.50365	0.266784	1.15572	6.60226	4.86257	3.8272
TCGA-33-AAS8-01A-11R-A405-07	2.47655	7.50249	10.5051	5.52484	6.90331	7.34182	3.81616	12.2878	9.31832	3.20035	4.47351	7.01759	8.52738	9.24644	9.31465	11.288	5.75898	4.34503	1.41632	2.45533	6.35109	0.0853048	4.02766
TCGA-33-AASB-01A-11R-A405-07	1.48877	7.81157	11.0356	5.5065	6.29085	5.63173	4.46957	9.50816	7.75955	3.39402	4.35313	6.63154	7.69513	10.4881	7.47401	11.989	6.10256	2.88064	0.433598	3.15184	6.2735	1.41984	4.81672
TCGA-33-AASD-01A-11R-A405-07	2.10083	7.84983	9.07472	5.22308	8.42044	7.21594	2.23309	11.0905	8.02879	2.93643	4.37745	7.29061	9.10326	9.45352	7.98466	10.8921	6.78921	4.52596	0.82393	0.895918	6.01087	0.165379	3.61811
TCGA-33-AASI-01A-22R-A405-07	2.24925	7.13175	9.02629	4.99272	4.8648	6.19688	1.09974	8.50706	8.54464	3.50889	4.5464	4.27176	8.05276	10.3155	6.64389	12.1201	6.80891	2.24426	0.186537	0.597884	6.06332	0.505671	5.24704
TCGA-33-AASJ-01A-11R-A405-07	1.87025	7.54243	9.25555	7.65786	5.04072	9.0492	2.10718	10.667	8.57062	4.0026	5.034	8.55105	8.33249	8.94341	10.6914	11.6208	6.07419	4.67001	1.74223	1.22935	6.76135	1.73667	4.61901
TCGA-33-AASL-01A-11R-A405-07	1.87975	6.59801	8.55859	4.92531	3.97304	7.60159	2.02963	12.4149	6.91344	3.04255	4.64683	5.95892	8.14735	11.0071	7.64746	11.5207	6.9477	2.85274	0.211002	3.55573	6.26374	0.0734801	3.5691
TCGA-34-2596-01A-01R-0851-07	2.31119	6.95981	9.47848	4.48405	6.55091	8.70462	2.56216	10.8631	8.94575	3.71278	4.22404	6.46556	8.46896	9.13451	9.53648	10.4189	7.24317	4.93734	1.76631	2.05531	7.2833	1.94013	5.21887
TCGA-34-2600-01A-01R-0851-07	2.08797	7.69155	8.63889	5.29853	0.421182	5.55085	5.53778	11.8122	8.41889	3.07058	4.06406	6.0078	9.53608	7.25431	7.72649	10.8846	7.15531	4.72529	1.19334	1.38285	6.85617	4.26689	3.30624
TCGA-34-2608-01A-02R-0851-07	2.14156	7.76951	8.86842	4.79878	5.1213	7.01714	2.38092	10.9801	8.38189	2.34018	4.94777	6.27868	8.02912	9.08049	7.39736	10.7281	7.66177	4.33571	0.627113	3.69847	6.00913	3.97673	5.38124
TCGA-34-5231-01A-21R-1820-07	2.41247	5.90617	9.20311	5.11931	4.14053	8.08618	5.99072	8.87207	8.65263	4.18048	5.15421	6.22609	8.25112	7.20947	6.89885	12.2865	6.84968	5.14273	2.71809	7.49109	7.2872	2.55384	5.96688
TCGA-34-5232-01A-21R-1820-07	1.74996	6.70821	9.03253	5.1152	1.67167	8.4491	4.06318	11.8149	8.0126	3.10861	5.19745	7.97948	7.58874	11.0196	8.63147	11.23	7.68665	4.95585	1.17149	2.22581	6.70358	3.52319	4.95115
TCGA-34-5234-01A-01R-1635-07	1.52046	7.28721	8.09171	4.54482	2.78348	5.80609	4.29852	9.65072	8.60693	1.93483	5.51175	5.64626	6.20744	9.47929	6.81092	11.7531	7.37216	2.94318	0.566213	3.75826	4.65063	3.11203	5.90451
TCGA-34-5236-01A-21R-1820-07	1.41402	7.55225	9.90121	4.48629	4.89733	6.9141	5.08184	10.9464	8.50809	2.62915	4.58966	6.43608	7.94085	8.06281	8.7526	10.9613	7.09485	4.29762	0.940163	3.89031	6.46015	1.26544	4.50109
TCGA-34-5239-01A-21R-1820-07	2.37921	6.83802	9.19384	5.1913	0.833758	6.1594	4.33799	10.04	9.21106	3.88435	5.59849	7.41476	7.67859	8.14932	6.60841	11.4523	7.23319	3.92813	1.84481	2.88346	6.99434	0.745405	5.21951
TCGA-34-5240-01A-01R-1443-07	1.87508	8.01282	9.15039	4.74277	6.94583	7.66754	4.89207	11.1971	9.73802	3.14402	4.72536	7.47314	8.5718	9.95143	10.9922	10.7764	7.06967	3.92322	1.2355	2.79609	5.45335	0.677387	4.81451
TCGA-34-5241-01A-01R-1443-07	2.11609	8.46848	9.02963	5.75249	2.17891	7.74739	6.80376	11.6857	9.0638	3.21417	5.47504	7.55212	7.65066	9.89551	7.2458	11.842	8.7525	4.6036	0.985918	3.625	5.9688	1.70104	5.64225
TCGA-34-5927-01A-11R-1820-07	0.69997	6.86769	9.65979	5.14013	3.71358	8.49263	5.46138	9.9828	7.94496	3.58303	4.22496	7.85884	6.93974	9.66387	8.4506	10.8524	6.5396	4.28369	1.75762	2.35728	7.1898	8.11107	5.7483
TCGA-34-5928-01A-11R-1820-07	1.47235	7.86176	10.1887	5.59916	1.01183	6.14844	3.09142	10.2925	7.69995	2.76563	4.69334	6.29749	7.84505	8.71447	7.74729	11.8184	7.47701	4.50962	0.734884	3.19311	7.29565	0.751689	5.98855
TCGA-34-5929-01A-11R-1820-07	2.38733	7.73908	10.3531	4.98456	2.47792	7.59045	3.61336	10.8085	8.93106	3.42851	4.47945	7.78076	8.00893	9.03054	9.72492	10.7735	6.25089	4.15054	1.58993	4.91658	7.21224	1.49774	4.63616
TCGA-34-7107-01A-11R-1949-07	1.56338	7.43388	9.54277	4.6499	3.23251	9.50296	5.1755	12.2092	8.40726	3.58872	3.64585	7.15432	7.349	7.80147	9.32548	11.1809	7.35628	4.8001	2.45573	1.9865	7.1948	1.62041	5.55693
TCGA-34-8454-01A-11R-2326-07	2.35906	6.74154	10.3692	5.47795	3.46112	7.60412	4.00927	11.7877	8.28396	3.31084	4.37388	6.57466	8.22267	8.79295	6.5797	10.8477	7.51329	5.46977	0.845735	3.05555	6.69392	5.15489	5.39703
TCGA-34-8455-01A-11R-2326-07	1.82215	7.8883	8.65934	5.30208	4.29628	8.72566	6.14878	11.2895	8.48079	2.85675	4.53189	6.64863	8.32971	9.48787	6.30307	11.2868	7.56863	5.22261	1.0804	3.0116	6.70214	7.54158	5.62465
TCGA-34-8456-01A-21R-2326-07	2.42538	6.45236	9.16749	5.55168	5.98733	7.98566	2.95532	10.9072	7.83382	2.96472	3.80354	6.29167	7.95608	8.62191	7.69921	10.8265	6.44792	3.72309	2.20293	1.59606	6.48824	1.51977	4.54067
TCGA-34-A5IX-01A-12R-A27Q-07	1.272	6.68213	9.05563	5.09462	1.50543	6.13069	2.52255	5.92161	7.94284	2.56073	4.43148	7.05334	6.90717	10.132	6.96619	11.8318	6.22853	2.72241	0.193156	3.63702	5.77713	0.120537	3.768
TCGA-37-3783-01A-01R-1201-07	0.89465	7.64754	9.03143	5.13679	1.56577	6.23266	4.45031	10.8831	8.40565	2.88385	6.43491	5.94266	6.41564	8.99921	8.91861	11.6699	7.58383	3.12835	0.680821	2.33613	5.62646	0.854775	5.02237
TCGA-37-3789-01A-01R-0980-07	2.52512	8.48313	10.1297	5.04146	4.24419	6.3651	5.15696	10.063	7.39538	2.62974	5.69944	5.90922	8.3542	8.7429	7.90998	12.0879	8.37006	3.44518	0.682054	4.32419	6.16569	1.56856	5.20801
TCGA-37-3792-01A-01R-0980-07	2.33919	8.76712	10.4092	4.72813	4.0841	6.81329	6.33853	9.4324	8.6991	3.45019	6.79953	5.97574	8.00865	10.3504	8.73548	10.6464	7.53671	4.9791	0.2376	2.11793	5.74546	0.698006	5.65809
TCGA-37-4129-01A-01R-1100-07	2.29893	6.3629	8.27002	5.02319	0.257267	5.61757	4.7856	9.8397	9.22967	1.34488	5.74743	5.69872	5.66985	7.62508	3.59283	11.0996	7.88158	3.05338	2.73191	0.389076	6.29659	0.155591	5.63304
TCGA-37-4130-01A-01R-1100-07	1.63918	5.35022	8.32597	3.45243	1.7846	5.514	7.81835	7.66603	8.69406	3.49733	4.8525	5.47358	5.44528	9.31959	6.05708	12.3418	7.32569	2.49888	0.159871	3.83811	4.65291	0.361901	6.08618
TCGA-37-4132-01A-01R-1100-07	2.2446	5.93894	9.47081	5.61777	5.08661	5.42722	6.17251	8.95873	7.601	2.83046	5.2326	5.03618	9.11282	9.91581	6.38982	12.3147	6.96754	3.59572	0.497614	1.02887	5.82516	0.134125	5.11807
TCGA-37-4133-01A-01R-1100-07	1.67838	7.67619	9.15792	5.44816	4.657	7.23316	5.06007	10.0191	8.49797	3.14938	5.2948	8.64505	8.07913	10.8718	8.89699	12.2157	7.38182	3.37255	0.804571	1.39254	5.75	1.14472	5.10433
TCGA-37-4135-01A-01R-1100-07	1.54277	6.25249	8.03049	3.90045	1.80435	5.01082	6.93618	9.32111	9.0022	3.12429	5.00238	7.09771	6.02913	7.83685	7.57267	12.7443	6.97231	2.44648	0.283238	1.53547	5.21533	0.107841	5.82858
TCGA-37-4141-01A-02R-1100-07	1.85863	6.72898	9.27619	4.27169	6.07589	5.91056	6.44225	9.94957	8.45367	3.49214	5.40155	6.25868	10.5832	9.30226	6.9176	10.8444	7.483	3.64932	0.568709	2.35651	6.66894	0.211269	6.26279
TCGA-37-5819-01A-01R-1635-07	2.63945	4.73802	9.44583	4.66855	4.08565	5.1121	3.79363	8.62159	8.11788	3.94262	4.928	6.85259	8.12607	7.79925	7.00516	11.6454	6.01418	3.55865	0.450345	4.4338	6.48622	1.84297	4.4405
TCGA-37-A5EL-01A-11R-A26W-07	1.73193	7.12245	10.9665	5.12485	5.46802	7.94739	2.48612	11.9538	7.74994	3.74463	5.0015	6.96564	8.10071	10.3827	8.85793	11.0117	6.16185	4.68147	1.49236	0.496799	6.66669	1.36929	3.97087
TCGA-37-A5EM-01A-21R-A27Q-07	2.17616	8.34502	9.87017	5.59451	3.53375	6.67236	5.31607	11.0546	8.83589	3.23555	4.4545	6.59681	7.46953	9.51917	7.20254	11.2622	7.20081	3.74319	0.674834	2.48841	6.50094	0.636754	4.28893
TCGA-37-A5EN-01A-21R-A26W-07	3.79361	5.97531	9.12336	5.33112	4.11903	8.0927	5.39877	10.7038	7.29307	3.27989	4.0196	6.19968	7.36679	8.19312	6.39351	11.3865	6.81773	2.8969	1.53132	1.55732	6.69721	4.19462	3.87492
TCGA-39-5011-01A-01R-1443-07	1.46632	5.59268	9.87913	5.16404	5.96695	6.10816	5.79577	9.43221	9.18834	3.23964	4.83286	6.22096	7.50825	8.69588	6.12082	12.1094	7.24126	3.61084	2.11078	5.69197	7.50473	1.62009	6.23442
TCGA-39-5016-01A-01R-1443-07	1.39712	5.73226	9.90162	5.55996	7.12061	9.31139	1.97519	11.8656	9.1278	3.15166	5.09065	6.83752	8.66284	9.67537	9.18121	11.582	7.53377	5.29857	0.722876	1.83956	7.05762	1.71947	5.38388
TCGA-39-5019-01A-01R-1820-07	2.20919	7.85995	9.23955	5.3284	3.96191	8.21517	3.96836	10.8546	8.3342	3.12837	4.31638	5.96277	7.80237	10.0136	8.17921	11.7755	7.20625	4.55031	1.90151	4.19916	6.84719	2.70429	4.69199
TCGA-39-5021-01A-01R-1443-07	1.45727	7.40087	9.77789	4.57381	5.28577	8.08527	4.68342	9.26822	8.46375	3.27747	4.5453	6.72505	8.18455	8.11243	10.5385	10.896	7.08821	4.19707	1.96582	2.2275	6.3385	2.91898	4.97834
TCGA-39-5022-01A-21R-1820-07	1.71616	6.88846	9.29725	4.68644	4.94208	6.1376	2.32193	9.34321	7.57379	2.50231	4.0689	6.31682	7.6227	8.90704	5.8044	10.4077	6.81105	3.67669	0.337359	2.66629	6.02908	2.17232	5.31919
TCGA-39-5024-01A-21R-1820-07	1.56415	7.86829	8.60081	4.54633	1.16858	7.75589	5.19238	11.6553	8.23277	2.53045	5.40874	6.44623	7.8217	10.2906	8.63807	11.5676	7.73017	4.15941	0.240814	1.86172	6.70465	3.84775	4.20041
TCGA-39-5027-01A-21R-1820-07	1.95115	5.97852	9.26106	4.70202	5.20747	7.84182	3.0982	11.7903	8.44152	2.9779	4.2164	6.70299	8.78135	8.4738	8.51025	11.6498	7.13294	3.25796	0.852642	2.34396	6.35787	4.80161	4.48807
TCGA-39-5028-01A-01R-1443-07	1.75252	7.32372	9.07883	5.43762	6.96817	6.75498	6.86805	11.163	8.50385	2.12936	5.41842	5.11705	8.08464	9.41709	5.98453	12.028	8.14981	4.93094	0.315771	2.26498	6.23812	3.711	5.89717
TCGA-39-5029-01A-01R-1443-07	1.82481	7.4622	9.44336	5.58456	3.56592	7.42645	5.46186	11.4035	8.67493	4.00838	4.40828	6.53269	8.97226	8.23145	6.81666	11.8336	7.72883	5.78789	0.560379	2.20543	6.10724	3.63404	4.66106
TCGA-39-5030-01A-01R-1443-07	1.55567	7.0178	9.398	4.49249	1.83184	6.16574	4.26821	9.92038	8.60662	2.85159	4.44139	7.0979	6.30209	8.57331	6.58624	10.3174	7.18066	3.88291	0.258896	2.63856	6.15195	0.377291	5.15541
TCGA-39-5031-01A-01R-1443-07	2.54058	7.91961	9.47051	5.08841	2.07129	7.43977	3.92925	10.9625	8.52732	2.93291	4.6941	6.55773	7.48533	9.33172	8.18813	11.3417	7.29094	4.32224	1.59857	3.73698	6.32486	5.16193	5.08552
TCGA-39-5034-01A-01R-1443-07	2.366	6.47394	9.4605	6.62904	5.89253	5.38251	3.99654	8.85597	8.02631	3.16079	4.89605	8.15809	9.41047	9.63482	6.45838	11.3702	7.75116	4.38812	0.293742	5.79392	6.62362	0.297394	4.37261
TCGA-39-5035-01A-01R-1443-07	1.90389	7.46544	8.30272	4.88209	0.477728	6.6138	4.29853	10.8258	8.11946	2.75582	4.86268	5.95174	7.15929	10.1547	6.00176	11.9825	6.99766	4.12543	2.57349	2.21436	7.34972	1.40591	8.40701
TCGA-39-5036-01A-01R-1443-07	1.82832	7.0345	9.46409	4.94433	5.73463	8.47263	2.63647	12.3998	8.92673	3.1203	4.86605	7.9441	8.57257	8.65587	8.37297	11.3975	6.61234	4.75109	0.809711	1.96352	6.69713	5.94447	4.06503
TCGA-39-5037-01A-01R-1443-07	1.33625	6.35232	9.12129	5.37221	6.01783	8.56523	3.55923	10.5806	8.94227	3.3181	4.90885	6.80685	8.46797	7.82221	7.72184	11.7679	7.72024	3.02819	1.61498	3.50638	5.80095	0.305926	4.35358
TCGA-39-5039-01A-01R-1443-07	1.78579	7.86294	10.1757	5.27487	2.52172	7.00221	3.84249	11.1999	9.44491	2.4233	4.77788	6.88653	8.51611	9.31075	5.51807	11.9229	7.81768	4.26747	0.443135	5.54465	6.37314	2.75684	6.54875
TCGA-39-5040-01A-21R-2125-07	3.12011	6.59538	9.61381	5.11472	1.97566	6.67011	2.12402	8.91723	7.70353	4.62749	4.24958	6.73697	8.27262	9.10663	9.07296	10.8719	8.13675	4.87134	0.139334	6.9665	6.05768	0.335847	4.74882
TCGA-43-2576-01A-01R-A32Z-07	1.34764	5.93043	8.64989	4.2274	1.08864	5.41843	3.42413	10.9253	8.95572	1.82688	3.74061	5.86288	7.60337	8.56908	5.17944	10.8384	6.04454	2.53322	0.11203	3.10417	5.07377	0.0915135	4.7405
TCGA-43-2578-01A-01R-0851-07	2.11874	6.46212	9.1773	5.26931	5.43441	5.12774	3.41023	8.75344	8.42557	4.53678	3.81413	6.05962	9.02212	9.08957	7.88548	11.5616	6.11186	4.07869	0.525205	3.56938	6.78852	2.60642	4.30482
TCGA-43-2581-01A-01R-0851-07	2.01274	7.06176	10.2079	5.02227	2.93604	6.67631	5.39366	9.4459	8.99154	2.63208	4.46779	5.50253	7.6643	9.88283	7.29111	11.5809	7.26099	3.86143	1.43679	7.87739	6.76092	0.484794	6.40303
TCGA-43-3394-01A-01R-0980-07	2.14526	7.38816	9.53144	5.22279	4.01306	9.22828	4.18439	10.9047	8.34156	4.14538	4.51117	6.62566	7.23278	9.01123	8.69307	11.5667	7.25384	6.13224	2.26315	3.38809	6.62515	1.26392	5.24384
TCGA-43-3920-01A-01R-0980-07	2.73464	6.88983	9.00949	5.46238	1.85529	6.68221	4.7662	10.4338	8.31457	3.19551	4.07495	6.17182	7.51757	10.673	8.72328	11.1575	6.60021	4.29845	0.160961	2.12107	5.48534	3.53127	5.87431
TCGA-43-5668-01A-01R-1635-07	3.07581	6.34113	9.89834	5.14961	2.10568	5.91019	2.48563	9.69436	7.96868	2.69711	4.21871	7.1136	7.58294	8.06471	6.85588	10.5808	7.78246	5.31312	1.26415	3.21329	6.51868	1.79931	5.41347
TCGA-43-5670-01A-21R-2125-07	1.96917	8.36598	10.3917	5.56453	2.36514	6.99291	6.10145	10.7158	8.6138	4.09272	4.90773	7.33083	9.24469	9.88824	7.64654	11.2247	7.23048	3.88023	0.713248	1.64905	7.21613	0.89323	4.20599
TCGA-43-6143-01A-11R-1820-07	2.71391	8.20411	8.96394	5.84652	4.48292	7.83638	4.02735	11.4526	7.23921	4.61687	4.5805	8.67782	9.10566	7.92452	9.45444	11.4628	7.63409	4.25326	2.22399	2.21173	6.92889	2.94133	6.16734
TCGA-43-6647-01A-11R-1820-07	1.37869	8.72284	9.70106	4.04488	4.33792	5.5029	3.98146	10.8558	8.21628	2.98683	4.54379	5.53432	7.68181	8.89431	8.03387	10.1292	7.05335	4.49654	0.36129	4.8317	6.04389	0.299586	5.58783
TCGA-43-6770-01A-11R-1820-07	2.18834	7.45309	9.66804	4.67022	6.48191	8.44832	3.99294	10.9173	8.12711	3.36311	3.86516	6.99332	7.48718	8.34971	9.64475	11.7836	6.7408	4.74168	1.53293	3.12524	6.96414	1.80757	5.16606
TCGA-43-6771-01A-11R-1820-07	1.34458	9.766	8.87339	3.70887	2.17017	6.33679	2.31181	10.1819	7.00612	2.89906	3.9284	6.62812	7.46933	8.10936	7.71219	10.6974	6.95283	3.73467	0.534891	4.82385	6.42058	0.101383	4.6907
TCGA-43-6773-01A-41R-1949-07	1.1445	7.33772	8.80644	4.43878	3.76406	6.83474	3.1826	11.1866	7.76365	2.4553	4.14444	5.41031	7.429	7.97198	8.02627	10.8869	6.28496	3.76554	0.781956	2.40451	5.95683	1.57909	4.47084
TCGA-43-7656-01A-11R-2125-07	3.19926	6.5677	8.59744	5.29737	3.47128	6.67033	3.09249	9.33884	8.38331	3.67681	4.79539	5.99215	8.03108	8.51336	7.0154	11.5667	7.47912	3.6373	1.11145	2.29572	7.23864	0.454838	4.95925
TCGA-43-7657-01A-31R-2125-07	1.00801	8.11436	10.2271	4.94215	4.39682	6.86105	4.6966	12.1931	8.33115	2.93083	4.82924	5.18511	7.62551	7.62238	9.28681	12.6079	7.01312	5.13637	2.12778	2.1175	6.42429	0.108689	3.52624
TCGA-43-7658-01A-11R-2125-07	3.14456	6.93825	9.78671	5.09975	0.969695	6.64325	6.5074	10.0966	8.44726	4.75634	4.09187	8.02488	6.97885	9.04142	8.1747	9.87627	6.66007	4.17506	0.781823	1.9178	6.83314	2.23615	4.92431
TCGA-43-8115-01A-11R-2247-07	3.4266	7.55021	9.56864	4.69146	2.35572	6.41132	4.90104	10.299	7.60887	3.10705	4.63299	5.95465	7.31901	8.72431	9.42859	10.0648	7.56882	5.41655	1.61436	3.81921	6.55934	1.12966	5.26323
TCGA-43-8116-01A-11R-2247-07	2.60114	6.24404	8.80724	4.96859	2.33042	7.09952	4.12014	10.8955	8.38222	3.63513	5.64669	7.03817	7.43715	8.36808	8.47773	11.7952	7.63392	6.14724	2.20206	2.19306	7.4299	0.145622	4.83158
TCGA-43-8118-01A-11R-2403-07	1.83284	6.70529	9.64099	5.45114	2.98011	7.91161	4.99695	10.0619	7.63987	3.93826	4.68269	6.54584	7.40693	9.34027	7.70943	11.4844	7.71019	5.01665	1.54741	4.61615	7.42132	1.51949	5.64542
TCGA-43-A474-01A-11R-A24H-07	2.07477	7.781	9.30822	6.30223	7.3051	9.51128	2.07587	11.9376	8.18947	3.87135	4.99055	7.30955	8.81471	8.13587	8.16874	12.4272	6.81773	5.44331	0.31347	2.04144	6.95894	4.82673	5.22811
TCGA-43-A475-01A-11R-A24H-07	2.55226	6.01504	9.52021	5.35602	6.23859	7.85746	3.32437	10.6202	7.89325	4.25094	5.05616	6.66323	7.72378	9.13474	9.10361	11.0772	7.38231	5.57889	0.855243	2.82662	6.26549	0.327885	5.19305
TCGA-43-A56U-01A-11R-A26W-07	1.8227	7.69794	8.53508	4.54378	1.35498	5.81407	3.63917	9.65881	7.30965	3.01054	3.57258	5.36799	7.06408	10.4371	6.69256	10.6754	6.12644	3.29185	0.411294	2.00812	5.18878	4.04879	4.05525
TCGA-43-A56V-01A-11R-A26W-07	2.11156	6.47387	9.77492	5.91257	3.3986	7.25455	4.03737	11.2497	7.90221	3.28769	5.07653	6.88868	8.04973	9.67452	6.58719	11.7049	7.51836	6.30943	0.520481	2.18276	5.85558	6.25487	4.82845
TCGA-46-3765-01A-01R-0980-07	2.27821	7.55475	10.1515	4.98784	5.45447	8.40521	3.37301	9.47523	8.06271	3.68267	4.62373	7.29257	8.29691	9.2525	8.31802	11.2651	7.40874	4.14605	1.12981	3.73472	6.4791	1.32389	5.52361
TCGA-46-3766-01A-01R-0980-07	1.78213	7.1434	9.12864	4.96563	1.1728	6.70954	4.64413	9.23725	7.63334	1.79888	4.89988	5.6078	6.99763	8.88898	5.59612	10.9923	8.18514	4.2328	0.297277	4.48483	5.84448	1.99145	6.16084
TCGA-46-3767-01A-01R-0980-07	2.08494	7.78525	9.53704	5.10639	1.6352	6.65009	3.77454	9.73559	7.92115	2.65976	4.81973	5.84073	7.0778	9.19977	7.10832	10.9295	8.11664	5.17666	0.271775	4.48035	6.31257	0.96025	5.83627
TCGA-46-3768-01A-01R-0980-07	2.09567	6.81236	9.74155	5.32751	6.31899	7.34824	3.6937	11.1776	9.40052	4.71204	5.37964	7.18049	8.8372	8.97628	8.55956	11.417	7.56068	4.98316	2.08309	2.99048	7.2773	4.74341	5.2436
TCGA-46-3769-01A-01R-0980-07	1.55012	6.70348	10.0775	4.23356	4.85333	6.28557	4.47151	10.4912	8.30267	2.83228	6.754	6.27589	6.72712	7.97567	6.59547	11.6619	8.16899	4.37267	0.543732	4.09353	6.95727	2.0455	6.36617
TCGA-46-6025-01A-11R-1820-07	1.97502	7.55692	9.80568	5.12135	6.36758	6.41397	2.60354	11.6654	8.18081	3.01222	4.18568	6.06147	9.40754	8.85541	9.08828	10.2702	6.17365	4.47164	0.154548	2.31498	6.26598	0.0131696	5.23909
TCGA-46-6026-01A-11R-1820-07	0.71655	8.40189	8.77042	5.32227	2.50596	6.9553	4.28595	9.71934	8.94908	3.46457	4.11004	6.98249	8.02571	8.72395	7.26551	11.7836	6.89193	4.31766	0.905814	1.72594	7.3486	3.74857	6.21739
TCGA-51-4079-01A-01R-1100-07	1.78514	8.00569	10.1779	4.99401	6.23045	7.66221	3.93421	11.1434	8.25531	3.54013	4.44579	7.81723	8.6149	9.20061	7.20665	10.6327	8.16767	4.63228	0.567541	3.08348	6.62843	2.93263	5.76469
TCGA-51-4080-01A-01R-1100-07	2.41784	5.9417	9.14217	5.54455	7.15104	8.52548	2.47018	10.2894	8.5254	3.66553	4.63017	6.75902	8.13841	8.38877	10.4926	12.6778	6.91351	4.02912	1.96804	1.59338	7.05146	0.478876	4.73651
TCGA-51-4081-01A-01R-1100-07	2.04551	7.32931	9.49204	5.30254	5.95324	7.14231	2.61078	11.1097	8.19049	3.93125	4.26741	7.02237	7.79908	9.35409	10.1227	10.7149	7.12137	5.364	1.15553	0.923914	6.70604	2.0641	5.49553
TCGA-51-6867-01A-11R-2045-07	2.36974	7.02404	9.98526	5.15315	5.91309	8.253	2.49166	10.912	7.95317	3.59068	4.43668	6.67	9.06913	9.13352	11.1736	10.592	6.85679	4.89772	1.00551	1.991	6.9188	2.98642	5.48516
TCGA-52-7622-01A-11R-2125-07	1.99293	7.94599	9.19926	5.43659	7.17528	7.39995	4.83027	10.5651	8.14986	3.26868	4.48924	6.78736	8.31733	9.72589	8.84861	11.1153	7.06007	4.55795	0.797509	4.34609	6.49249	4.43113	6.17131
TCGA-52-7809-01A-21R-2125-07	2.591	7.2781	9.26082	5.04276	1.86214	5.8697	3.51454	7.90585	7.59971	4.84211	4.69628	6.86122	7.36027	8.74429	8.67214	11.425	7.12848	4.41034	0.959301	4.0043	7.21009	1.81558	5.30355
TCGA-52-7810-01A-11R-2125-07	1.75037	8.61298	9.38789	6.86202	4.54693	6.6011	4.14359	12.3579	8.23172	4.23484	4.91728	7.26994	8.11487	9.38667	8.05502	13.7452	7.24094	4.66463	0.165153	1.96634	6.5457	0.0211306	4.84099
TCGA-52-7811-01A-11R-2125-07	1.86875	8.36241	9.67751	5.66487	5.39216	7.03792	4.88017	11.841	7.85713	3.42495	4.68848	7.18081	6.97199	9.125	7.01814	12.1714	7.57756	5.04742	0.192571	4.13478	6.61425	2.44473	5.63588
TCGA-52-7812-01A-11R-2125-07	2.47906	6.73284	10.1561	5.81662	4.46142	6.14562	4.39953	9.6907	8.94632	4.35129	4.62533	6.27323	7.51517	8.98975	7.11867	12.0845	7.85139	3.65895	0.17347	5.62152	7.12605	0.232488	5.44315
TCGA-56-1622-01A-01R-0692-07	2.82443	7.31619	10.3286	5.91726	4.62065	8.43452	1.96158	10.5092	8.20905	3.75963	4.60834	6.72642	8.84465	10.6727	7.78663	11.9575	7.23731	4.48884	0.391006	1.40737	7.06112	6.69585	5.79334
TCGA-56-5897-01A-11R-1635-07	1.45625	7.47315	9.36809	5.21712	7.26307	7.22947	3.00248	10.7953	7.78146	2.87684	4.40074	6.25081	7.66747	9.04768	6.81007	10.5198	7.48281	4.29647	0.0788941	3.98058	6.46649	2.28397	4.79167
TCGA-56-5898-01A-11R-1635-07	2.43157	8.22682	8.9493	5.97008	4.281	8.08661	2.44811	11.5896	7.80321	2.49694	4.06904	6.37667	8.38891	9.48298	7.36659	11.3693	7.09027	4.62527	0.778923	4.35253	6.18254	0.68835	5.02895
TCGA-56-6545-01A-11R-1820-07	3.29503	7.70617	9.67856	4.97908	2.12248	6.48608	4.24496	9.07288	7.8738	3.65689	4.32777	6.85063	8.32531	8.97084	8.18124	10.8759	7.7732	4.56929	0.341542	3.36322	6.64714	0.273684	5.6664
TCGA-56-6546-01A-11R-1820-07	2.3346	7.04366	9.84268	4.83313	1.11453	5.90586	5.29828	9.09328	8.70619	3.52881	4.28667	6.31265	7.18492	9.50419	7.66149	11.9088	6.86737	4.11122	1.78873	3.89773	6.69623	1.09786	4.42503
TCGA-56-7221-01A-11R-2045-07	1.72519	8.1121	8.91938	5.05853	4.79853	8.86459	4.41562	11.8175	7.80404	3.65616	3.67019	6.35264	7.81917	9.73837	6.22406	10.7963	7.65413	3.72442	1.36842	4.19679	6.78198	4.53132	4.60258
TCGA-56-7222-01A-11R-2045-07	1.73762	7.39729	9.87468	5.61327	4.03339	7.70833	3.26445	10.5317	8.27586	3.42733	4.77475	5.92951	8.00006	9.08761	7.15611	11.8062	8.10096	5.37167	0.662702	3.36826	7.25566	3.78142	7.04269
TCGA-56-7223-01A-11R-2045-07	2.67491	6.95726	9.68777	5.24686	6.98957	8.13125	2.22679	7.93246	7.41316	4.01758	4.28892	6.57969	8.90986	7.83707	11.4196	10.1999	6.63632	4.42847	0.313159	0.7361	6.92868	1.15172	4.5815
TCGA-56-7579-01A-11R-2045-07	1.54731	7.27764	9.32945	5.05824	7.28177	8.27093	2.6591	11.8653	8.29576	3.18788	5.14642	5.99133	7.61919	8.97882	9.77114	11.6368	7.93098	4.04904	0.485393	3.86364	6.27133	0.405313	3.57766
TCGA-56-7580-01A-11R-2045-07	2.40483	7.09251	9.08974	5.51484	2.46787	7.96724	6.24747	10.2819	7.51894	3.13155	4.3752	6.57256	8.45558	10.1621	8.75464	11.5577	5.91918	3.46827	0.592507	2.03173	6.83986	2.18898	4.34531
TCGA-56-7582-01A-11R-2045-07	1.94597	8.50072	9.29701	6.12407	6.59026	8.66762	4.01192	10.8594	7.94104	3.52507	4.53508	6.50787	8.28941	10.2212	9.04592	11.0723	7.40483	4.4662	0.682669	1.62038	7.11095	2.23998	5.3471
TCGA-56-7730-01A-11R-2125-07	2.42574	6.56925	9.60157	4.64225	5.97902	7.19683	2.67481	10.6441	8.67771	3.7426	3.89013	6.67728	8.10666	9.43818	9.05564	10.3053	6.19178	4.38431	2.14206	2.42724	7.23999	0.488968	4.90149
TCGA-56-7731-01A-11R-2125-07	1.04365	7.59637	9.23594	5.29342	1.04296	7.3569	6.09413	11.9663	8.13769	2.1897	4.76141	6.76229	7.19316	10.1528	6.08197	11.1716	7.38556	4.49175	0.266647	4.1794	5.89622	6.78987	5.94079
TCGA-56-7822-01A-11R-2125-07	1.47881	8.60868	9.19602	6.3876	4.41462	6.8497	3.84873	12.5935	7.66373	2.30557	4.24001	6.63279	6.38129	9.91301	6.88139	10.8803	7.99844	5.86604	0.190714	6.31432	5.80754	2.42243	5.0359
TCGA-56-7823-01B-11R-2247-07	2.43013	6.07042	9.93055	5.10695	5.43194	8.05865	2.85954	11.801	9.13537	3.96357	4.15195	7.5906	8.8896	9.8906	10.0816	11.1166	7.69832	4.26277	1.84975	0.639885	7.07618	3.15715	4.22489
TCGA-56-8082-01A-11R-2247-07	2.35262	7.21252	9.18664	5.63762	2.62429	8.69207	4.0629	11.9406	8.5792	3.79886	4.90962	6.80484	7.6561	10.7676	8.97732	10.617	7.19222	4.4969	0.721089	1.98668	7.20349	6.02973	4.52272
TCGA-56-8083-01A-11R-2247-07	2.62537	6.37667	9.21955	4.91005	0.576498	5.74396	9.89483	9.65521	7.47133	4.24965	4.66916	6.60091	7.58567	8.99787	7.77811	10.8855	7.13504	4.63755	1.7282	3.38379	6.68062	2.68849	5.66734
TCGA-56-8201-01A-11R-2247-07	1.24059	6.08826	9.63991	4.72144	1.18531	6.27198	4.59553	11.524	8.92899	3.45021	5.38564	5.09646	7.37332	9.82356	7.04915	11.6715	7.40459	4.19503	0.968398	4.24768	7.03632	0.945821	5.65906
TCGA-56-8304-01A-11R-2326-07	2.19515	8.11326	8.79319	5.50683	1.36773	6.84989	5.20752	12.6	8.08426	3.07022	4.72497	7.17135	7.44901	10.3115	6.90108	11.7157	6.98598	4.67198	0.223229	1.19875	5.78582	4.5028	4.77491
TCGA-56-8305-01A-11R-2296-07	2.44019	8.17317	9.43648	4.82815	5.52532	6.44539	3.43124	10.6091	8.81726	3.05925	3.91421	7.9181	8.1411	8.49172	8.03935	11.63	5.97527	3.57382	0.826322	2.6009	6.80702	1.57186	4.15171
TCGA-56-8307-01A-11R-2296-07	2.75684	6.52504	9.48618	5.24727	2.65498	6.33796	4.24567	10.0238	9.2987	3.67681	5.75022	7.18	7.23699	7.80434	7.59436	10.9762	7.2316	3.68929	1.93769	1.75205	7.14177	0.141575	4.68723
TCGA-56-8308-01A-11R-2296-07	1.45778	7.73674	9.59052	5.37027	5.0783	8.90838	4.24139	11.3648	7.79321	2.79556	3.55931	6.84481	8.76634	9.66498	7.41929	10.7142	6.80389	3.95903	1.03541	2.71235	6.59081	2.89811	4.74538
TCGA-56-8309-01A-11R-2296-07	2.583	6.85537	9.69001	5.13328	1.82195	7.26135	3.51938	11.0272	9.06214	2.71462	4.27552	6.62995	7.47238	9.50287	6.09685	10.0047	6.90342	3.9319	0.352828	3.30344	5.96921	0.278427	5.42029
TCGA-56-8503-01A-11R-2403-07	1.76001	7.49886	9.11068	4.76675	2.6051	6.37949	5.34974	10.5811	7.73534	2.7835	4.18551	6.55007	7.58439	10.6408	7.84619	10.9484	6.79719	4.16801	0.175585	2.80932	6.31382	3.18719	5.44328
TCGA-56-8504-01A-11R-2403-07	1.01212	6.63414	9.3553	5.38776	5.3305	7.70813	2.45992	11.7067	8.19942	3.85096	5.62699	6.89776	7.86616	9.04944	7.86926	11.7086	7.63612	5.96812	0.655852	2.3903	6.80357	8.03622	5.17491
TCGA-56-8622-01A-11R-2403-07	1.77216	8.78223	9.40569	5.41387	3.43105	6.38977	6.68164	12.3321	8.5298	1.47939	4.49376	4.90552	7.73523	8.25154	6.0574	11.0446	7.62945	4.26272	1.1514	3.8968	6.16156	0.268178	3.95383
TCGA-56-8623-01A-11R-A28V-07	1.78517	8.58723	8.24422	5.03285	1.15909	6.59762	2.27977	9.29808	8.63463	1.84257	4.06643	6.83977	6.16109	9.9619	6.97877	10.3819	7.43959	4.19796	0.458152	4.49137	5.83729	5.72706	6.17286
TCGA-56-8624-01A-11R-2403-07	2.72584	8.17065	7.83107	5.04185	1.18232	6.32016	2.41497	11.5821	7.79152	1.89698	3.78696	5.91665	6.23428	7.32865	5.67057	11.2876	7.45045	4.52816	1.05437	4.41338	6.08685	3.60237	3.92007
TCGA-56-8625-01A-11R-2403-07	1.89501	7.67084	9.12488	5.19216	1.95044	6.57116	5.01542	10.6499	8.10375	3.34008	4.2381	7.40868	7.28784	9.00107	6.97724	10.2282	7.48374	5.0428	0.796596	3.52638	6.53163	1.14507	5.27473
TCGA-56-8626-01A-11R-2403-07	2.53062	8.31118	9.95581	5.17517	2.35192	7.16483	3.12472	11.2875	9.20253	2.36079	4.51102	6.10447	8.23157	8.3622	7.80666	10.8411	7.5115	4.86057	0.653715	4.52994	6.40993	3.28664	5.02548
TCGA-56-8628-01A-11R-2403-07	3.10468	7.90332	9.63985	5.32754	1.64408	7.5765	4.8425	10.0764	8.39793	2.75836	3.99492	6.23413	7.62459	10.0414	8.09911	10.1891	6.88336	4.8605	0.621156	4.2404	6.2384	2.43269	5.67062
TCGA-56-8629-01A-11R-2403-07	2.19306	7.63582	9.60132	4.4449	5.14588	7.03402	3.93828	10.3481	8.54911	2.93935	4.60887	6.13554	8.42625	8.91789	9.8125	11.1514	6.73891	5.56495	1.07707	2.68497	6.44829	2.7216	4.89747
TCGA-56-A49D-01A-11R-A24H-07	1.69521	7.26982	8.81025	5.51524	1.15991	6.51736	5.92165	10.9033	8.61871	2.73915	5.17324	5.97689	8.37062	9.2595	6.68287	12.0927	6.97588	4.61471	0.303798	3.91835	6.16025	2.48548	5.08593
TCGA-56-A4BW-01A-11R-A24H-07	1.54357	6.98944	8.8202	4.67239	0.66591	6.98266	3.18405	10.626	7.79811	2.50334	5.07711	5.48427	6.99395	10.3354	6.6104	10.156	8.11143	4.97579	0.428321	1.92206	6.15436	4.701	4.50038
TCGA-56-A4BX-01A-11R-A24H-07	1.33054	6.34075	9.66987	5.67057	5.47431	8.83961	3.56192	11.6342	8.64785	3.52075	4.82353	6.11932	8.07259	8.76639	8.96321	11.4393	6.32095	4.95976	1.04996	0.551661	6.5476	7.16224	4.27208
TCGA-56-A4BY-01A-11R-A24H-07	3.1323	7.95283	9.00929	6.24789	7.51965	7.45956	2.51015	11.3681	8.58313	3.90539	4.15324	6.62201	9.06132	9.53563	9.7697	11.1134	6.22101	5.02328	1.57218	1.93624	6.6893	4.78419	4.59662
TCGA-56-A4ZJ-01A-11R-A262-07	2.08603	8.52421	9.30388	5.12755	1.20491	6.29416	3.41779	11.8579	8.23913	2.31313	4.75721	6.63013	7.18088	10.0138	7.91315	10.7611	7.35489	4.03936	0.554704	5.04263	6.14134	1.36868	5.76749
TCGA-56-A4ZK-01A-11R-A262-07	2.57413	8.3876	8.80331	6.20038	5.85988	8.11367	6.13925	11.7094	7.49378	3.09533	3.76229	6.95494	8.53014	9.20622	9.95888	11.2206	6.53277	4.01421	0.726653	2.07326	6.42449	2.68705	4.65689
TCGA-56-A5DR-01A-11R-A27Q-07	0.982917	7.06736	9.41523	5.03714	5.51524	5.99897	3.81755	11.6093	8.28859	4.38124	5.20586	6.8983	8.52293	9.07474	8.95968	11.8246	7.13206	5.90239	1.29428	1.9716	6.89059	1.37314	4.40748
TCGA-56-A5DS-01A-11R-A27Q-07	2.1278	6.38856	8.52601	5.0885	0.959126	8.31332	5.32355	11.3709	7.70997	2.58604	4.68089	5.997	7.41031	10.6874	7.44751	10.5938	7.18661	4.24768	1.48724	1.61657	5.98224	7.19851	4.25135
TCGA-56-A62T-01A-11R-A405-07	2.22878	8.37894	9.79351	5.62072	8.53432	6.53576	1.2854	12.9141	7.2482	3.43601	4.08711	6.7726	8.80017	9.26941	8.63511	11.3985	6.64001	4.66974	0.475632	1.62881	6.97129	0.723372	4.81417
TCGA-58-8386-01A-11R-2296-07	1.94145	8.23545	9.55498	5.71725	2.4686	6.25105	1.91273	10.7298	8.42701	2.77631	3.52539	7.18633	6.338	9.06891	6.77126	11.999	7.85106	4.56788	0.863564	6.80896	6.76418	0.565617	5.31806
TCGA-58-8387-01A-11R-2296-07	1.55588	6.13298	8.88613	5.10923	1.93948	6.23097	3.01154	10.4688	9.24388	4.05278	4.27008	5.92376	7.28572	10.0703	8.27537	12.2922	6.39724	3.4655	0.619164	1.46369	5.98727	3.20539	4.55256
TCGA-58-8388-01A-11R-2326-07	3.11692	6.37004	9.36414	4.77352	1.78826	6.51251	4.93369	8.64716	8.34154	3.62847	3.35531	6.07537	6.27212	8.25933	7.72594	10.5085	7.15375	4.5084	0.726971	3.7322	6.53717	0.220204	6.89368
TCGA-58-8390-01A-11R-2326-07	2.30998	7.24196	10.0596	5.3591	2.77343	6.77602	5.18348	10.1917	8.65457	3.6506	4.58744	6.02912	7.05478	9.0992	8.3028	10.8342	7.21841	4.86941	1.14612	2.28495	6.97992	0.732562	4.88214
TCGA-58-8391-01A-11R-2326-07	2.0392	7.61059	10.0214	4.88881	5.78572	8.39892	2.1804	12.4522	8.44816	3.88875	5.34671	7.99585	7.84846	10.9116	9.60144	10.2463	7.33736	4.75817	0.699418	1.66993	6.10374	1.02244	5.47012
TCGA-58-8392-01A-11R-2326-07	2.52374	7.48136	9.99256	5.18035	4.99745	8.16297	2.76273	10.8674	7.89011	3.61579	4.00652	6.85447	7.37625	9.70158	7.89034	11.1159	6.89347	4.73747	1.37212	3.03367	6.82593	3.34258	4.66546
TCGA-58-8393-01A-11R-2326-07	2.55439	7.78013	9.21784	5.50771	6.35531	6.75536	2.22764	11.796	7.99649	3.63006	4.52935	7.0026	8.64253	10.139	9.08955	10.8211	7.22153	4.36108	0.206596	3.5682	6.57488	3.12446	5.04593
TCGA-58-A46J-01A-11R-A24H-07	1.8029	6.97986	9.24336	5.70632	1.62448	7.4937	3.63708	11.802	9.35319	4.34215	4.1962	7.57346	7.12454	11.236	7.35073	11.6697	5.87598	3.39357	0.416455	2.72412	6.82018	0.492722	4.54481
TCGA-58-A46K-01A-11R-A24H-07	1.93082	7.70281	9.94599	4.60017	6.6929	8.07304	3.72201	10.8451	8.85236	4.18008	4.92858	7.56567	8.52488	9.75062	10.1865	10.2376	6.64633	4.69622	1.34835	2.35939	6.96885	0.879484	4.24804
TCGA-58-A46L-01A-11R-A24H-07	2.13788	7.15072	9.86622	5.63493	3.18315	7.24801	8.03806	10.7562	7.55226	4.99331	4.31002	7.06336	7.11659	9.83819	8.41766	10.0795	7.04151	4.01325	0.981957	2.41776	6.87092	3.02321	4.34581
TCGA-58-A46M-01A-11R-A24H-07	1.31279	5.45503	9.40394	5.30218	5.79868	7.63423	3.46713	10.3927	8.53989	4.54747	5.30969	5.57452	8.66604	8.8963	9.43998	11.1159	8.37334	4.77	0.867875	1.17016	6.49047	0.0877673	5.83358
TCGA-58-A46N-01A-11R-A24H-07	2.72437	7.25613	9.50382	5.57661	6.32682	8.22406	2.10976	12.115	9.16481	3.86823	4.26722	6.42234	8.00147	9.55837	9.05369	11.6097	7.18692	4.20538	1.29192	2.45122	6.14434	6.10839	5.05123
TCGA-60-2695-01A-01R-0851-07	2.76417	8.20114	8.74435	4.91875	1.82127	6.50863	4.37839	9.90818	8.18644	3.34654	4.50457	7.26205	7.47944	9.17327	7.6429	11.5143	7.10822	4.13394	1.41916	2.90574	7.47752	1.95808	5.53751
TCGA-60-2696-01A-01R-0851-07	1.60566	7.60016	8.11965	5.4365	4.69735	7.21753	5.81507	9.36976	8.13592	3.47175	5.66912	7.68455	7.72897	9.11512	7.63872	11.7736	8.15375	5.27063	0.193399	3.13136	6.9576	5.5871	6.14201
TCGA-60-2697-01A-11R-2125-07	1.87888	7.82676	9.48783	4.89531	3.55642	6.27919	4.67481	8.53065	7.64495	2.64076	4.58701	5.80291	6.71325	9.51765	6.16753	10.5435	7.04709	4.01829	0.506666	4.86317	5.98645	1.65647	5.98848
TCGA-60-2698-01A-01R-0851-07	0.983538	8.25905	10.2968	4.77958	3.31686	7.20726	5.02649	10.9081	8.53648	3.28903	4.41466	6.98458	7.71267	9.28829	7.30224	11.2398	7.97077	4.901	1.42999	4.0048	6.9881	2.94916	5.49468
TCGA-60-2703-01A-11R-2045-07	2.54259	7.20933	10.0438	5.71729	2.29374	6.01094	5.64408	9.33214	8.05689	4.05148	4.73197	7.22078	7.63827	10.3119	7.20101	11.9132	7.37228	5.19078	0.403559	3.21632	6.48499	0.862368	6.11416
TCGA-60-2704-01A-11R-2045-07	2.50289	7.74808	9.8177	5.36812	3.63205	7.15494	4.79258	10.6457	7.57259	3.31094	4.10154	6.26808	6.93699	9.61975	9.20876	10.4689	7.51959	4.19789	1.57837	4.83369	6.5718	1.32336	6.35496
TCGA-60-2706-01A-01R-0851-07	2.7932	5.80857	9.05274	6.03455	7.29207	6.65416	4.0782	9.38278	8.39572	3.82171	4.66819	6.59058	8.8659	8.99381	9.18703	10.0664	7.26874	4.42764	0.598794	2.14206	7.25365	2.17034	5.01493
TCGA-60-2707-01A-01R-0851-07	1.05403	8.88742	9.59666	5.14646	1.76537	7.03078	4.11405	11.6053	7.92351	2.59965	4.48166	7.3725	7.23338	9.82928	6.49841	11.3395	7.93683	4.79055	0.329946	3.4973	6.51326	5.86426	5.87101
TCGA-60-2708-01A-01R-0851-07	1.91769	7.88645	9.30198	5.23523	2.93658	6.44911	5.87355	11.451	8.23696	2.19814	4.32885	5.60402	8.02125	8.52839	7.27675	12.7238	7.10441	4.90294	0.539837	2.12178	7.01092	1.99705	5.40982
TCGA-60-2709-01A-21R-1820-07	1.71482	7.22366	9.29968	4.57265	5.50682	6.75543	2.21011	9.69473	8.57143	3.1595	3.82408	6.82767	8.41583	9.23155	8.26206	10.5814	7.4039	4.50437	1.34075	3.64167	6.51665	1.2893	5.14146
TCGA-60-2710-01A-01R-0851-07	1.85883	8.35632	9.84491	5.24505	6.3573	8.16123	3.21688	10.9804	8.46482	3.30752	4.30141	7.11334	8.30621	9.18838	9.33198	10.8249	7.71215	4.87398	0.959227	4.27921	7.06028	1.07051	5.40503
TCGA-60-2711-01A-01R-0851-07	2.56504	6.26603	9.87021	5.04476	3.4272	8.03536	3.26129	9.77591	8.03705	3.644	4.51291	5.64316	8.54522	8.629	10.0497	11.3445	7.03331	4.4834	1.8801	1.27612	7.46193	1.72581	4.43924
TCGA-60-2712-01A-01R-0851-07	1.51409	7.95963	7.93919	4.37162	1.13695	5.69247	5.3644	9.28614	7.73692	2.80436	4.25717	6.71556	7.15154	8.86763	7.42175	11.2213	7.3627	3.57131	0.436063	2.98374	6.49904	0.228635	5.04995
TCGA-60-2713-01A-01R-0851-07	2.48375	8.09652	9.41179	5.03186	2.88788	6.52137	8.24637	9.86239	8.20807	4.10069	3.95203	7.08846	7.44255	10.7136	7.66225	10.7601	7.65015	4.28428	0.774907	3.66297	6.74471	0.340465	5.49666
TCGA-60-2714-01A-01R-0851-07	1.60773	6.70715	9.316	5.5784	3.17715	5.28429	2.48535	10.9606	9.15577	3.96171	4.04139	6.65342	7.54235	9.25857	6.32228	12.4587	7.16223	4.59236	0.927173	7.78557	7.25817	1.48072	4.7559
TCGA-60-2715-01A-01R-0851-07	1.97687	7.74652	8.97151	4.47697	2.6177	6.65061	3.5757	9.62961	8.13105	2.50802	4.23932	6.00447	6.67064	9.55049	7.05336	10.9613	7.51277	4.01389	1.04173	4.80278	6.31406	3.24321	5.32052
TCGA-60-2716-01A-01R-0851-07	2.3842	6.47569	8.88112	4.50285	1.7221	8.71626	3.0578	10.209	7.75131	3.41161	4.56204	6.99988	4.96334	8.28872	5.09216	12.2452	8.13537	4.56396	2.61635	1.49836	7.28989	2.59869	4.47369
TCGA-60-2719-01A-01R-0851-07	1.94924	7.00499	9.00305	5.45801	2.1927	8.00411	5.11614	10.3098	9.05214	3.98897	4.66124	7.13757	8.69594	9.69152	10.2069	11.9724	6.92478	5.43857	1.2151	2.85273	7.49834	3.7613	4.91445
TCGA-60-2720-01A-01R-0851-07	0.427441	8.27073	9.12915	4.64889	1.12455	5.56694	6.09124	10.3651	7.72621	2.04779	5.14095	5.74936	8.10004	10.1354	5.50903	11.9185	6.64499	2.73156	0.201266	3.99066	5.67024	1.04237	5.64373
TCGA-60-2721-01A-01R-0851-07	2.43478	6.51389	8.25333	4.63784	1.25617	8.0293	3.14825	11.5034	7.71557	2.59683	3.97574	5.70727	8.21661	9.10965	6.8506	10.6503	7.45257	4.78316	1.33759	3.87128	6.83816	5.20595	4.52696
TCGA-60-2722-01A-01R-0851-07	2.0273	8.09331	10.6671	5.01913	5.4141	7.90775	2.96275	12.174	8.74984	3.23803	4.50619	8.42177	9.18542	8.27475	10.4082	11.3672	7.80484	4.86201	1.10699	1.41942	6.77242	1.27464	5.38413
TCGA-60-2723-01A-01R-0851-07	1.01935	7.59466	10.1235	4.63962	5.92372	7.53491	5.36791	9.94601	8.52664	3.21672	5.04567	7.81972	9.2417	9.32409	9.34876	12.3068	6.98775	4.48345	0.100016	4.3069	6.16362	0.0616568	5.10896
TCGA-60-2724-01A-01R-0851-07	1.77787	8.73615	9.5158	5.63309	2.1812	6.62402	4.42523	11.2165	8.65566	3.48516	5.36306	5.60994	7.84373	7.57086	7.43837	11.8973	7.76103	4.95803	1.40136	2.6992	6.81913	1.64468	5.49421
TCGA-60-2725-01A-01R-1201-07	2.03878	7.93654	8.89144	4.95396	2.15639	6.81618	4.51299	10.5765	9.0589	3.36562	4.83315	6.95363	7.39975	10.4042	7.99928	10.6053	7.73514	3.84729	2.14911	4.1462	6.80743	2.61487	6.11629
TCGA-60-2726-01A-01R-0851-07	1.85179	6.55982	8.13914	5.15954	1.0077	7.74243	6.26767	11.9939	8.99441	3.46987	3.97305	7.2936	7.3269	11.2927	7.90736	12.3002	5.98251	2.60225	0.420245	1.12614	5.82164	6.12208	5.13214
TCGA-63-5128-01A-01R-1443-07	1.82343	8.38249	9.34516	5.35371	4.07696	7.73091	3.12453	11.511	8.29354	3.60144	3.71826	6.94204	7.37752	8.39383	9.31898	11.9041	6.43766	4.66915	0.695782	3.09883	6.51402	0.231417	5.08225
TCGA-63-5131-01A-01R-1443-07	1.95605	7.07431	9.47944	5.09521	3.05818	7.36277	2.75825	11.1554	9.15716	3.23403	4.96775	7.04686	7.53433	9.02808	8.88765	11.497	7.94292	5.87048	1.64041	2.18939	6.78176	5.52938	4.66667
TCGA-63-6202-01A-11R-1820-07	1.60846	6.83463	9.87225	4.81614	1.93541	5.14762	4.57166	10.3583	9.1909	2.96434	4.31469	4.80469	7.47174	8.40166	6.04857	12.1271	7.41345	3.70559	0.509377	6.76756	7.26777	0.0560619	5.29576
TCGA-63-7020-01A-11R-1949-07	2.55229	7.45897	9.28021	5.42381	2.58252	7.207	6.74838	10.6615	8.07796	3.01477	4.09838	6.46603	8.38835	9.05522	5.98197	11.4245	8.18691	5.487	0.579276	3.10156	6.74963	8.6186	5.31071
TCGA-63-7021-01A-11R-1949-07	1.1905	7.13978	8.81623	5.22411	3.26307	7.28816	3.77641	10.9117	7.03722	2.0278	4.13533	5.73131	7.05443	10.072	6.92308	11.5396	7.23077	3.97102	0.695946	3.6638	6.38937	0.160037	3.46702
TCGA-63-7022-01A-11R-1949-07	1.65833	6.15386	9.16258	4.16099	1.87379	5.84766	3.56836	9.23164	7.51443	2.0412	4.60258	4.84987	7.46953	8.48654	6.18368	10.4477	7.33917	3.82894	0.735556	2.72269	5.68825	1.96311	4.50103
TCGA-63-7023-01A-11R-1949-07	1.50323	6.82729	9.2074	6.0826	3.14467	6.61952	6.2402	10.1799	9.08717	4.06825	5.15539	6.6711	7.81635	7.85518	7.36858	13.125	7.37686	5.55232	0.546535	3.48309	7.5275	0.752578	4.89432
TCGA-63-A5M9-01A-11R-A26W-07	2.51704	6.68296	9.19936	5.4615	6.60697	7.70539	2.26097	9.25124	8.03936	4.0359	4.54019	7.6045	9.45485	9.53942	8.55943	10.7372	6.38764	4.36366	1.2022	2.67296	6.57899	0.944592	5.06428
TCGA-63-A5MB-01A-11R-A26W-07	2.2253	6.85541	9.75116	5.17536	5.63471	7.62419	1.66343	9.21966	8.15709	3.99727	4.45769	7.03981	8.496	9.4051	8.08013	10.8086	6.39162	4.76418	1.92231	2.36778	7.3662	0.735727	4.35218
TCGA-63-A5MG-01A-12R-A27Q-07	1.85776	6.80858	8.69059	5.53255	1.40335	6.87541	2.05397	11.107	7.30757	2.59806	3.9517	6.42344	7.21064	10.2433	5.26725	10.4825	7.63947	4.65708	0.139476	1.98477	5.26023	4.51451	4.53631
TCGA-63-A5MH-01A-12R-A27Q-07	3.2023	7.88383	9.59263	5.50592	3.03244	6.13223	4.34897	10.6718	8.5922	3.75797	4.43602	7.3384	7.74177	8.52205	9.35447	10.7571	6.47698	3.73571	0.728394	1.98893	6.28689	0.943989	5.20834
TCGA-63-A5MI-01A-12R-A27Q-07	2.07869	6.22832	9.19371	5.3866	2.58588	7.61826	5.21052	10.6745	7.9089	3.32503	4.80906	6.64979	8.15555	8.66149	8.61952	12.1341	7.02021	4.29872	1.11105	2.38146	6.39161	6.19228	6.21465
TCGA-63-A5MJ-01A-11R-A27Q-07	1.60287	6.91983	9.60259	5.58008	5.69969	7.78975	2.89151	11.983	9.04338	3.19508	4.77841	6.62089	8.4984	10.8512	10.1048	10.6754	7.80258	5.60822	1.93875	2.15187	6.93302	0.253721	5.17414
TCGA-63-A5ML-01A-31R-A27Q-07	2.04752	7.62484	10.0289	5.17541	6.7962	7.44153	2.9481	10.3548	8.98213	4.21076	5.15572	6.02455	8.00832	9.93054	8.17618	10.629	7.34674	4.17944	1.05758	2.14637	6.54501	1.80493	4.64115
TCGA-63-A5MM-01A-11R-A26W-07	1.84906	9.02696	10.1374	5.0839	3.66563	6.43778	3.6214	10.5738	8.47491	3.21347	5.03533	5.39492	7.39084	10.1064	6.55351	11.5865	6.26514	2.86676	0.212428	2.94717	6.07365	0.254574	5.80447
TCGA-63-A5MN-01A-22R-A27Q-07	1.93027	6.85661	9.61484	4.72581	1.97493	5.39014	4.27411	9.69657	7.55057	2.53871	4.24308	4.84095	6.24883	9.36552	5.18872	10.4483	7.19005	3.29965	0.187821	6.28185	6.09968	0.843972	5.35609
TCGA-63-A5MP-01A-11R-A26W-07	1.65681	6.27979	9.44819	5.06054	4.95366	8.41435	3.7684	10.6518	7.94171	3.78318	5.23244	4.8668	7.47563	9.83316	10.2487	10.8848	7.82126	3.68101	2.31663	2.91853	6.57657	2.26025	5.62933
TCGA-63-A5MR-01A-31R-A27Q-07	1.89348	8.18554	9.79597	5.01368	1.42084	6.28919	4.66293	11.8258	6.60465	3.46186	4.12847	7.56185	7.82714	9.09083	6.64865	11.4152	7.21848	4.15645	0.820292	2.49192	6.92714	0.296471	4.75903
TCGA-63-A5MS-01A-11R-A26W-07	2.13343	7.731	9.04911	5.02821	1.54068	6.76157	3.11379	10.6428	8.09048	2.57612	3.41059	5.95196	6.24111	9.41982	7.89469	9.96322	6.98341	4.46464	0.932469	3.1865	6.06685	4.23714	5.33801
TCGA-63-A5MT-01A-21R-A26W-07	2.41319	7.35649	8.89024	5.6364	1.8635	6.76648	5.08949	10.2023	7.65661	3.0083	5.47175	5.88754	8.40063	10.6166	7.97158	10.9123	7.12328	4.52697	0.68833	2.53322	6.48356	0.393061	5.95635
TCGA-63-A5MU-01A-11R-A26W-07	2.09558	7.1457	8.66686	5.99106	7.49882	8.66607	2.88675	11.3483	8.29898	3.9256	5.09244	7.27537	7.72004	8.96976	8.06782	12.1975	7.66787	4.88761	2.56883	0.969143	6.79616	6.42326	5.17421
TCGA-63-A5MV-01A-21R-A26W-07	3.20067	7.48613	8.94546	5.42505	3.46349	7.27344	4.78271	10.6174	7.39343	2.58675	4.39639	5.268	7.45852	10.1484	7.0995	10.1657	6.81038	3.59279	1.18975	2.61222	6.14621	4.13499	6.60599
TCGA-63-A5MW-01A-11R-A26W-07	3.10382	5.99246	9.16681	6.64461	3.45335	6.26578	4.64294	9.49636	9.00939	4.07465	4.74531	6.25454	7.42487	10.539	8.83554	11.6781	6.27529	5.06403	1.02944	1.57393	6.2256	0.841306	4.75899
TCGA-63-A5MY-01A-11R-A26W-07	2.17842	5.27874	8.08587	5.86639	5.27411	7.20813	0.924843	11.7957	8.25321	4.50009	5.38335	5.67214	8.22386	8.5789	9.10518	12.0792	6.99231	4.76841	1.4726	0.398327	6.66264	4.20606	4.58639
TCGA-66-2727-01A-01R-0980-07	1.88069	7.44804	9.75283	4.75685	6.42553	10.3972	3.49592	11.0857	8.86556	4.21179	5.80957	8.01241	8.82752	9.51265	8.072	11.4509	7.76299	5.49325	0.98511	3.47983	6.78486	3.90587	4.81777
TCGA-66-2734-01A-01R-0980-07	1.67957	8.17541	8.94079	5.05897	1.75603	7.27993	4.64976	10.689	8.57642	2.77073	5.14001	6.28068	7.83084	9.846	7.54688	10.9778	8.53651	4.72229	0.158465	3.24852	6.6726	4.98276	5.90752
TCGA-66-2737-01A-01R-0980-07	2.03762	6.87628	9.69085	5.21693	5.10555	7.30346	4.46699	10.7552	8.36015	3.63322	5.15245	6.77948	8.33267	9.06307	8.87064	11.3054	7.68894	4.11942	0.92769	3.64514	6.41016	5.40084	5.08845
TCGA-66-2742-01A-01R-0980-07	1.84418	7.75676	9.7216	5.57266	3.28064	8.2683	7.30164	11.0911	8.8152	3.516	4.77748	7.34529	7.75968	9.94472	7.0679	11.1898	7.72216	4.57154	0.689257	3.01587	6.50179	7.44267	5.96068
TCGA-66-2744-01A-01R-0980-07	1.44375	7.80392	9.88011	4.76445	1.52801	5.85565	3.97509	9.54613	8.51771	3.34643	4.26353	5.66358	7.62943	9.25498	7.28966	11.2097	8.1096	4.39623	0.627509	4.02927	6.60194	0.671832	5.97831
TCGA-66-2753-01A-01R-0980-07	1.8009	7.37218	10.1215	5.35708	2.58954	6.86463	3.10254	9.78694	8.73226	4.49773	4.66032	6.8935	7.79136	8.57597	9.09009	11.898	7.75358	4.91201	1.85526	3.12193	6.73674	1.06959	8.27835
TCGA-66-2754-01A-01R-0980-07	2.18085	5.90468	8.92316	5.0389	4.05584	5.67352	4.96873	9.02374	8.27731	4.25121	6.57861	7.31273	7.29139	7.18696	8.88153	11.4913	7.961	3.42261	2.39935	4.40446	7.94127	0.109439	4.24018
TCGA-66-2755-01A-01R-0851-07	1.96972	7.21986	9.40203	4.92138	3.72637	6.04155	6.56448	9.82852	9.65669	4.40692	5.34859	7.22987	7.78997	8.85387	10.2724	11.7384	7.7325	3.32673	0.415024	2.29908	6.69166	0.209088	5.42121
TCGA-66-2756-01A-01R-0851-07	2.41321	5.91478	9.88259	5.93571	2.69445	5.4456	4.52412	9.88974	8.17265	2.98906	4.89578	6.42541	7.43733	8.29093	6.23707	12.4799	7.25055	3.40086	3.09372	2.16924	6.88053	3.91497	3.67247
TCGA-66-2757-01A-01R-0851-07	2.49992	7.22185	8.74005	5.27414	1.42365	6.28763	6.81587	8.00498	9.24568	3.89866	4.07644	7.22008	7.1764	8.82408	7.44921	12.0848	6.96902	3.61603	1.01234	1.83181	6.95572	1.45782	5.45175
TCGA-66-2758-01A-02R-0851-07	1.64455	6.43244	9.38746	5.78124	5.49552	7.26458	3.69602	10.623	9.16255	3.66646	4.54	8.56123	8.8699	8.75992	10.2806	12.6588	7.03906	4.55691	1.97904	2.3228	6.5456	1.81658	5.30031
TCGA-66-2759-01A-01R-0851-07	1.77029	7.46145	9.53812	4.64749	6.81123	8.82744	3.87002	11.5465	7.92689	4.21189	4.37773	6.74256	8.71483	9.85465	9.98024	10.5681	7.79828	4.72754	1.1635	2.55843	6.4125	0.510209	4.95613
TCGA-66-2763-01A-01R-0851-07	2.06148	7.53839	8.4879	5.37009	1.19694	6.91957	2.60239	11.4645	7.77092	2.79039	4.95579	5.8881	7.21592	9.36405	6.79279	12.6129	8.00178	5.21893	0.849196	2.93399	6.73352	2.35449	7.59551
TCGA-66-2765-01A-01R-0851-07	1.28161	8.09568	9.00957	4.32141	1.34911	6.87582	6.4257	10.6896	8.26945	2.49255	4.92702	6.59491	7.39845	9.28642	6.81685	11.6331	7.85345	3.82016	0.138073	2.85896	6.93957	0.520462	5.75634
TCGA-66-2766-01A-01R-0851-07	1.55291	7.70699	8.96873	6.06653	6.28677	6.87566	4.85314	12.2734	8.35196	4.1151	5.35039	7.97278	7.06656	9.98781	9.62234	12.3946	7.68358	4.45903	2.30826	1.04625	6.1373	0.877314	4.89933
TCGA-66-2767-01A-01R-0851-07	1.98538	6.58372	8.62545	4.71116	2.13249	6.78896	2.89086	11.5125	8.268	3.04745	4.47972	6.64757	7.34663	9.42105	7.3105	11.1531	8.3012	4.78753	1.63468	3.48745	6.52834	0.961278	5.33788
TCGA-66-2768-01A-01R-0851-07	2.35405	8.91606	9.55897	4.48631	3.08999	6.24984	5.07556	11.8396	7.85466	3.45105	5.16917	6.42307	7.96904	10.1658	7.07022	11.1571	8.53459	4.15518	1.85225	3.04417	6.31152	0.473637	5.146
TCGA-66-2769-01A-02R-0851-07	1.55031	7.95104	9.1032	5.20607	3.76681	6.41378	4.9424	10.7178	8.41008	3.39793	5.317	5.6161	8.79995	8.53689	8.60355	12.1191	7.83287	4.89532	1.09106	3.93025	6.36039	0.166361	5.68918
TCGA-66-2770-01A-01R-0851-07	2.41188	6.87462	9.38067	5.03012	5.91363	7.65658	3.64426	11.73	7.93938	3.6468	4.2723	7.4524	8.03211	9.24481	8.58662	10.5811	7.41351	4.79708	0.277244	3.44194	6.36109	0.47158	5.53772
TCGA-66-2771-01A-01R-0980-07	2.12663	6.12399	8.47618	4.54759	1.24235	6.27128	4.80754	10.472	7.53237	2.42936	5.06853	6.97006	6.62383	10.1023	7.76779	11.5071	8.06641	4.18668	1.07043	3.2127	6.14546	3.08215	5.47693
TCGA-66-2773-01A-01R-1201-07	2.16201	7.55104	9.57333	5.22498	7.03818	7.40346	3.4917	11.0587	8.97832	3.71162	4.79521	7.6031	8.79972	9.91023	9.11791	11.0805	7.72155	4.19201	0.596516	2.46579	6.47858	1.3979	5.19074
TCGA-66-2777-01A-01R-1201-07	1.79102	8.36273	9.65675	5.05993	4.26497	6.91423	4.83906	10.6493	8.67735	3.94349	5.10524	7.97704	7.66719	8.7819	8.20428	10.9421	8.32249	4.83971	0.651089	4.19467	6.48022	2.51053	5.4664
TCGA-66-2778-01A-02R-0851-07	0.644908	7.77233	8.36293	4.57062	0.949653	6.60522	7.53087	11.7021	8.54695	2.61123	5.48019	6.86243	7.26673	9.59782	6.92008	11.885	7.80962	4.52466	0.420764	3.0661	6.02572	4.32574	4.70282
TCGA-66-2780-01A-01R-0851-07	1.97105	7.94418	9.46053	4.68252	1.64292	6.96641	6.49847	11.1203	9.24852	2.3002	4.74296	6.45159	8.47123	9.44813	7.10185	12.4101	8.85845	5.06028	0.339253	2.25502	6.75996	2.18951	5.47223
TCGA-66-2781-01A-01R-0851-07	1.01174	7.28021	9.38314	4.50979	4.11591	6.51738	7.21456	10.9853	8.61718	3.31591	3.90069	6.65295	7.20655	8.59727	8.27606	11.8555	7.651	4.29026	1.22565	1.71139	6.62071	1.89801	4.84741
TCGA-66-2782-01A-01R-0851-07	1.49953	6.11333	8.61607	5.6213	5.14997	6.59721	3.13835	11.4539	8.79573	2.81507	5.41131	3.52061	8.44686	8.64746	6.76234	12.7682	8.60554	5.07694	0.820937	2.63833	6.12178	3.43908	5.48858
TCGA-66-2783-01A-01R-1201-07	1.80828	8.05668	9.58519	4.3384	6.65445	7.59686	3.30827	11.6992	8.13917	2.1767	5.23089	7.47956	9.42349	9.88173	9.63482	11.0384	7.42854	3.92553	0.160421	2.51319	6.46349	3.89912	4.35303
TCGA-66-2785-01A-01R-0851-07	1.80318	6.76372	9.19132	4.71047	1.55518	6.06047	5.42762	9.41735	8.39573	2.72301	4.75378	5.7192	7.62111	10.2177	6.12833	11.7803	7.75355	5.47839	0.312552	2.17745	6.17559	0.134999	4.09581
TCGA-66-2786-01A-01R-0851-07	2.4192	7.3156	9.67957	4.96166	3.23949	7.05781	6.83943	10.186	8.44669	3.65268	5.46743	7.72742	8.42933	8.97984	6.5678	11.8502	8.40389	4.70736	0.809917	3.9117	6.73125	4.47011	5.51646
TCGA-66-2787-01A-01R-0980-07	2.43677	6.46279	9.45957	5.41521	6.64224	7.44198	3.03277	11.1302	9.02706	3.67133	4.31501	7.27018	8.46398	9.08286	10.3045	10.7124	7.13638	3.94677	1.44023	3.47084	6.99615	0.490929	4.811
TCGA-66-2788-01A-01R-0980-07	1.85329	8.21088	9.78713	5.36863	3.61541	7.1362	4.19774	10.4231	7.22427	2.57473	4.51257	7.77672	7.92296	8.76391	6.8324	10.9396	7.693	4.41057	1.16617	3.17084	6.43757	5.459	5.19418
TCGA-66-2789-01A-01R-0980-07	3.52844	7.12556	9.8256	5.5504	2.28916	6.80613	3.78922	10.3958	8.18325	3.85523	5.01726	6.53305	8.27211	8.92314	8.5955	10.807	7.24033	4.84274	0.910167	4.30359	6.03072	2.73714	5.89057
TCGA-66-2790-01A-01R-0980-07	1.46647	7.43109	9.325	5.10617	2.46042	6.47369	3.6633	10.1585	7.46416	3.11522	4.99706	6.40587	7.1919	10.9422	7.98313	10.4685	7.86555	4.70614	1.95069	2.51246	6.98887	4.31792	5.29252
TCGA-66-2791-01A-01R-0980-07	2.20044	6.15899	9.50976	4.75116	4.73807	7.58262	3.32874	11.0763	8.3542	3.42724	5.07743	6.22172	8.04768	8.81602	8.6188	11.5228	7.4964	4.86518	1.34953	3.05797	6.74617	2.09247	5.3705
TCGA-66-2792-01A-01R-0980-07	1.85382	7.00224	9.52728	5.19987	4.69324	9.17076	2.63461	10.7945	8.16913	4.32224	4.11697	7.23559	8.19326	9.04585	9.46739	11.5839	6.97704	4.40807	0.979509	3.93088	6.92467	3.38884	5.71857
TCGA-66-2793-01A-01R-1201-07	3.33625	6.75994	9.15979	5.33181	1.28044	7.29021	3.93878	10.3204	7.63355	3.96641	5.1212	6.88538	8.67586	9.87969	8.24759	11.7091	6.76401	4.41436	1.96607	2.16532	7.13947	3.1422	5.60418
TCGA-66-2794-01A-01R-1201-07	1.27833	6.46301	9.15308	5.3214	7.11779	8.31273	3.38922	11.5971	9.54623	4.32252	5.84156	7.21436	8.05284	8.76101	9.93713	12.884	7.77851	4.99996	3.79521	2.42158	7.21008	2.76115	4.93933
TCGA-66-2795-01A-02R-0980-07	1.70728	6.88959	10.0646	4.69653	4.35852	7.99222	3.89683	10.411	8.13385	2.78987	5.02863	6.30378	8.65961	9.14353	7.95944	12.2032	8.47324	4.19137	0.200554	2.64156	6.75353	1.1388	4.73772
TCGA-66-2800-01A-01R-1201-07	1.70262	7.67454	9.79893	5.71108	4.87566	7.08804	4.23505	9.91397	9.74113	3.45608	4.69761	6.78723	7.55294	9.3451	10.2528	11.7851	7.44858	4.34102	2.36847	4.17927	6.80831	1.75411	5.69738
TCGA-68-7755-01A-11R-2125-07	1.62299	7.82778	10.0791	4.78402	6.65737	7.87784	1.77573	12.0297	8.55195	3.68407	4.89681	6.93889	8.26682	8.04943	10.144	11.4262	7.33168	3.99964	1.85222	1.22289	7.18499	0.265549	4.52398
TCGA-68-7756-01A-11R-2125-07	1.50066	8.0635	9.73217	5.448	6.68538	7.44764	3.15409	10.5101	8.06891	2.87657	4.63117	7.47758	7.88777	9.04983	7.03406	11.5572	7.5081	4.22783	0.432244	4.17825	6.89792	8.9546	5.73216
TCGA-68-7757-01B-11R-2296-07	2.39107	8.43941	9.39837	4.98395	1.337	8.18497	3.95299	11.9414	8.06099	2.00135	4.27629	6.64914	8.11504	10.3533	6.46617	10.3811	6.39681	4.24082	0.731346	2.80522	6.26617	4.82829	6.08759
TCGA-68-8250-01A-11R-2296-07	2.60337	7.98504	9.57868	5.05894	3.0161	8.23184	6.49464	11.0288	8.39538	3.15064	5.13908	6.24709	8.94382	10.0613	6.80757	11.7728	6.93355	5.68971	1.47367	3.44624	7.12952	9.72658	5.93475
TCGA-68-8251-01A-11R-2296-07	2.33287	7.35218	9.05054	5.23957	2.06282	7.11563	5.09869	10.3989	8.55699	3.97307	5.83925	6.46721	7.56099	8.66628	7.60281	11.8893	6.59668	3.93202	1.87198	2.94515	7.06693	0.485205	5.37322
TCGA-68-A59I-01A-11R-A262-07	2.38572	8.21325	10.0932	5.24196	1.88736	6.25597	2.77799	11.0354	8.13733	2.56657	5.14051	5.56939	7.40171	9.31677	8.1391	10.5097	7.44794	4.28663	0.749353	2.09979	6.14372	7.2161	5.59503
TCGA-68-A59J-01A-21R-A26W-07	2.06365	7.84296	9.89745	5.2623	7.58639	7.55134	2.19242	10.1854	8.18929	3.83809	4.07378	6.69026	7.73963	9.9893	8.02226	10.9726	7.11276	4.79585	0.852073	4.0362	6.62344	1.82245	4.53673
TCGA-6A-AB49-01A-12R-A405-07	2.8086	8.18416	9.84107	5.3189	3.31846	5.5154	1.81294	10.2997	9.30117	2.92937	3.6696	5.69697	6.51907	9.26753	4.65551	11.6511	5.51861	2.48373	0.329764	0.974549	6.24216	0.797778	5.62463
TCGA-70-6722-01A-11R-1820-07	1.83292	8.39247	10.7613	5.30532	2.05239	6.37326	4.97522	10.576	7.80451	3.62581	5.22079	5.86629	8.39803	7.98276	5.98698	10.6119	8.09303	4.63364	0.145691	3.65761	6.27982	0.160295	6.15384
TCGA-70-6723-01A-11R-1820-07	1.81752	7.71538	10.0722	5.09288	5.63227	9.56371	4.06976	10.6673	7.39906	4.01092	4.73438	7.03793	8.48455	8.01153	10.4726	11.6049	8.8212	4.69604	1.85154	2.55497	7.03793	0.819459	5.96043
TCGA-77-6842-01A-11R-1949-07	2.45574	6.64335	9.88211	5.87436	2.23118	8.05215	3.54541	10.2168	9.14916	3.95695	4.73169	6.56483	7.76331	8.28968	7.01845	11.52	8.23956	4.67514	0.677053	2.50285	7.31731	0.0588435	5.16158
TCGA-77-6843-01A-11R-1949-07	3.01695	6.36275	10.5093	5.48861	7.06082	8.3047	3.81714	8.55342	7.98609	2.82332	4.28031	6.46076	9.96053	8.29084	7.81467	10.7194	7.83418	4.95772	0.679929	0.996723	6.804	1.64647	4.42731
TCGA-77-6844-01A-11R-1949-07	2.52773	6.99748	8.80315	5.5866	2.26629	8.37584	3.10725	12.2069	7.64369	3.67304	4.72214	6.55862	8.35737	9.08031	7.11081	11.7293	7.47641	4.66167	0.900605	1.77076	7.14498	7.04698	4.70083
TCGA-77-6845-01A-11R-1949-07	1.14451	6.75884	9.62666	5.05671	6.30085	7.24718	3.79294	11.0429	8.00319	3.34945	5.33938	7.44053	9.2371	8.56648	7.82469	11.9083	7.06775	3.77175	1.68761	1.65261	6.68566	1.8997	4.65163
TCGA-77-7138-01A-41R-2045-07	2.57167	8.71259	10.2303	5.62489	2.89908	5.96766	2.51598	10.2404	6.32262	3.08047	5.05804	4.7633	8.13292	8.1912	6.4556	11.7247	7.44696	3.47883	0.0485062	3.1532	5.78492	0.57075	5.07548
TCGA-77-7139-01A-11R-2045-07	1.97409	5.76981	9.85224	5.97212	6.10163	8.33087	4.4524	11.8585	8.32709	3.58246	4.84787	6.29331	8.35108	8.7823	7.64233	12.3093	6.64018	3.25214	1.28537	4.69231	6.84486	0.729113	3.59541
TCGA-77-7140-01A-41R-2045-07	1.15089	7.53464	9.89133	5.37876	5.49559	9.0688	2.79382	11.0242	8.0722	3.10101	4.67567	6.42934	8.38576	8.17039	9.64013	11.9145	6.18508	6.10424	1.44231	3.15326	7.02413	1.40304	5.08307
TCGA-77-7141-01A-11R-2045-07	2.80956	7.24795	9.34151	5.22467	5.97064	7.70824	1.55538	11.018	8.29235	3.43363	5.04457	6.79228	7.99476	9.05249	9.31751	11.7411	7.09079	4.42381	0.887282	1.86442	6.61138	3.40682	6.15527
TCGA-77-7142-01A-11R-2045-07	1.4112	6.52933	9.72369	5.0685	1.49823	8.40539	2.9874	10.9067	8.85203	3.40631	5.41756	5.92879	7.18936	8.44067	8.73855	10.8166	8.42675	5.92816	1.35318	4.50445	7.6063	1.08942	5.51362
TCGA-77-7335-01A-11R-2045-07	1.38976	6.43222	9.39176	4.82759	1.39584	6.9401	2.9563	11.501	8.26666	1.5777	4.58314	7.34153	7.80882	9.70787	6.13617	10.7578	7.39537	3.29378	0.124385	3.29697	6.10957	1.09707	5.24667
TCGA-77-7337-01A-21R-2045-07	2.6627	8.29785	11.0121	5.83623	3.13562	7.17337	6.1005	11.3361	8.55546	3.45921	5.42612	6.65242	7.94626	8.84951	8.27894	11.4837	8.54956	6.02722	0.732898	2.67546	6.63744	3.47615	6.19053
TCGA-77-7338-01A-11R-2045-07	1.64942	7.9599	10.1543	5.08851	6.17586	9.29353	4.18664	11.5319	8.15554	3.00894	5.24446	6.95841	7.90998	9.19267	9.06622	10.9497	7.83565	5.18789	0.853651	3.6039	6.83041	0.225617	5.61211
TCGA-77-7463-01A-11R-2045-07	1.44504	6.62373	8.70239	6.10723	5.48782	7.61277	3.16752	12.7878	8.35753	3.74836	4.93937	6.82213	8.19216	8.87196	9.21122	12.4072	6.71324	5.26478	0.141826	2.529	6.40993	4.30763	4.67228
TCGA-77-7465-01A-11R-2045-07	2.7964	5.97218	9.36414	5.35836	1.47593	6.01536	6.40089	10.401	8.70825	3.87196	5.4091	6.97417	6.81915	9.26235	9.5956	11.3367	6.98147	4.21864	0.547031	2.48718	6.94297	0.273021	5.5406
TCGA-77-8007-01A-11R-2187-07	2.20354	7.22036	9.32239	6.14033	4.5244	5.78041	3.73167	9.79216	9.05128	3.91901	4.78412	5.9046	7.75501	9.03434	5.43468	12.3802	7.27338	3.33067	0.301532	5.28928	6.99404	0.232728	6.05252
TCGA-77-8008-01A-21R-2187-07	2.11715	8.52978	9.83755	4.9637	3.02787	6.79666	5.67765	10.387	7.05454	2.11378	4.79364	4.79478	7.71325	8.91653	6.09644	10.2696	7.49825	4.21851	0.194656	4.88511	5.94326	0.182913	4.93386
TCGA-77-8009-01A-11R-2187-07	1.56126	6.06123	10.2659	5.15946	6.62938	8.09127	2.68737	11.5459	8.98861	3.93088	4.24314	7.7666	9.18616	7.69552	9.59299	10.8509	6.82908	5.09555	1.7016	1.93671	6.90004	0.0244999	6.42202
TCGA-77-8128-01A-11R-2247-07	1.46817	7.06658	9.77152	5.62218	4.69833	8.41843	5.40347	10.8863	8.48271	3.9781	4.98312	6.18922	7.84359	7.86751	7.27128	11.7564	6.97871	5.21619	2.73295	1.85289	7.08348	1.62767	5.10594
TCGA-77-8130-01A-11R-2247-07	2.29433	9.20008	9.38889	5.09291	2.23702	7.32944	5.00981	12.6289	8.11515	1.96469	4.60699	5.57384	8.81538	8.57247	5.55743	11.4514	7.04823	4.20749	0.0839793	3.00058	5.9475	0.133852	5.35641
TCGA-77-8131-01A-11R-2247-07	1.68416	8.583	8.85463	5.31851	1.76354	6.25914	6.07038	11.7309	8.21941	2.62389	4.57932	5.64844	7.00281	9.05418	6.3264	11.5244	7.5035	3.56195	0.21698	3.67511	5.84331	1.14359	5.10684
TCGA-77-8133-01A-12R-2247-07	2.20834	7.30302	9.20096	5.03834	2.91334	8.64235	3.13456	11.7158	8.49439	4.39504	4.11895	7.06314	7.67804	8.42652	8.02887	10.8318	7.09403	5.17425	1.89095	2.13304	6.75746	5.46379	4.91034
TCGA-77-8136-01A-11R-2247-07	2.78606	8.75497	10.2313	4.92789	1.89404	5.88162	4.68065	10.4293	7.48846	3.42579	4.43891	5.8058	8.0338	9.67512	6.97845	10.3425	6.84845	4.68957	0.228582	3.89421	6.37893	1.24639	5.81022
TCGA-77-8138-01A-11R-2247-07	1.96272	7.34388	9.67257	5.45594	3.34639	7.25063	4.21828	11.357	8.2247	2.77812	4.87307	5.066	9.20297	8.75284	6.99309	11.2368	7.60447	5.92751	0.517116	4.29697	6.33363	1.4353	6.24229
TCGA-77-8139-01A-11R-2247-07	2.80019	8.53407	8.97795	5.31289	1.14931	8.16452	3.58544	10.6658	8.48216	3.9024	4.43714	4.83726	8.50407	9.1346	9.03746	11.3352	6.06572	4.3387	0.826803	2.185	6.6272	5.4664	5.18294
TCGA-77-8140-01A-11R-2247-07	2.85306	7.50754	10.3217	5.95358	3.05036	7.15444	1.08532	12.3954	9.06689	2.80748	3.98844	6.7003	8.55127	10.3924	7.22232	12.185	6.25	3.92611	0.640397	2.42984	6.90558	2.04285	4.30061
TCGA-77-8143-01A-11R-2247-07	1.8244	7.11248	9.40872	5.93673	3.66435	7.48665	3.66172	11.8182	9.79475	4.0437	4.20172	7.8175	8.10137	8.79336	6.1761	11.821	6.91494	5.01772	0.111798	2.4567	7.12851	1.61278	5.49758
TCGA-77-8144-01A-11R-2247-07	1.90392	7.82447	10.0902	5.58988	4.26877	6.5376	4.14311	10.4974	7.80866	3.68376	4.95873	6.44073	7.54174	7.75814	7.84888	10.8929	7.61242	3.23041	0.110852	0.964049	6.43905	0.571229	5.89193
TCGA-77-8145-01A-11R-2247-07	1.98796	8.72287	10.666	5.33169	2.83145	6.97943	3.38801	11.5678	8.12774	3.091	3.90351	6.34025	8.18013	9.17557	8.00779	10.5899	6.20689	3.87145	0.169568	3.52248	6.00694	6.53596	5.05154
TCGA-77-8146-01A-11R-2247-07	1.82511	7.74761	9.29256	4.84312	6.44966	6.17043	2.0498	11.1134	8.46003	3.24546	4.62444	7.57003	7.90872	9.16158	6.70086	10.7979	6.89112	4.07585	0.618553	3.74923	6.43691	7.37652	5.57446
TCGA-77-8148-01A-11R-2247-07	0.993331	7.37138	9.01734	5.13577	3.58664	8.03816	6.61084	10.8588	8.2877	3.88908	4.08608	6.80059	7.7858	7.83507	7.53855	12.5816	6.40768	4.32683	2.23397	4.01062	6.86459	2.22575	4.85285
TCGA-77-8150-01A-11R-2247-07	1.47432	7.04642	8.46889	4.71219	6.28035	8.38924	2.71597	11.8622	8.45603	3.35406	5.02851	7.04776	7.68571	8.79876	8.59981	11.3539	7.39665	3.44451	2.29218	2.82086	7.09305	2.64246	4.77638
TCGA-77-8153-01A-11R-2403-07	1.55575	8.52495	9.57252	5.49414	6.0881	8.06731	2.63376	11.7199	8.64446	3.88159	4.36735	7.60545	8.06454	9.17183	10.0441	10.972	6.38612	4.27908	1.80773	1.07146	6.51166	0.509887	4.61322
TCGA-77-8154-01A-11R-2247-07	1.63889	6.9111	8.76093	5.00384	2.71195	8.44106	3.27238	11.596	8.61243	3.659	5.35032	6.20251	7.78407	10.0158	7.55488	11.3877	7.33177	5.34132	2.78062	1.73072	7.24214	7.10866	4.40765
TCGA-77-8156-01A-11R-2247-07	1.98934	7.59837	9.77015	4.28133	5.05103	7.22743	6.6762	10.1337	8.24715	3.61125	4.33585	6.61098	7.82741	8.96064	8.76386	10.8894	6.82585	4.889	1.97452	2.66456	6.37867	6.45672	5.20636
TCGA-77-A5FZ-01A-31R-A27Q-07	1.9872	7.42136	8.99574	4.78793	1.28191	5.82068	3.86987	8.59603	7.76262	2.7444	4.5779	5.5823	6.02518	10.0373	5.24102	10.6967	7.20517	4.06563	0.268014	4.78784	5.76328	0.902438	5.93292
TCGA-77-A5G1-01A-11R-A27Q-07	2.53956	7.5303	10.018	5.31271	1.88511	6.783	6.13336	10.6023	7.79367	2.31472	4.48012	5.95463	8.72513	8.87031	9.27386	10.7264	7.48727	5.28278	0.209722	4.18	6.09343	0.156015	5.67943
TCGA-77-A5G3-01A-31R-A27Q-07	2.65944	7.21924	9.72226	5.15224	4.72524	8.79856	3.70695	10.8531	8.12582	4.01016	3.84651	6.90694	8.20625	9.00043	9.66728	11.4812	7.33987	4.05826	2.01574	2.36097	7.15339	2.27156	4.94255
TCGA-77-A5G6-01A-11R-A27Q-07	3.69045	6.70613	8.86177	5.69374	1.71196	7.16852	3.14924	11.3787	7.72676	3.03139	4.43922	6.75472	8.43658	9.30639	7.8794	11.0641	7.25582	5.03644	0.311466	1.98971	6.60358	4.15038	5.05924
TCGA-77-A5G7-01B-11R-A27Q-07	1.53492	5.10204	9.37766	5.40981	2.31717	7.16103	5.02631	9.93802	8.9452	3.58326	4.15628	7.10654	7.21675	10.3014	6.57674	11.3396	7.34602	4.0171	0.970718	1.20597	6.9694	0.497846	3.51547
TCGA-77-A5G8-01B-11R-A27Q-07	1.31041	7.26182	8.67295	5.03845	4.75705	7.23118	3.68962	12.1087	6.95144	3.10469	5.03207	5.77357	6.90784	9.02012	6.47112	11.3505	7.55334	4.47117	0.538933	2.19044	5.95645	0.206977	4.23165
TCGA-77-A5GA-01A-11R-A27Q-07	2.00961	6.97782	8.57191	5.1091	5.21503	7.98628	4.20678	12.0862	8.80739	2.78057	4.89971	6.78179	7.7309	9.51642	7.82362	11.347	6.41714	3.20519	1.12668	1.23392	6.38945	0.857206	4.43206
TCGA-77-A5GB-01B-11R-A27Q-07	2.4278	9.16792	9.87948	5.01759	1.2385	6.42754	6.59722	11.0034	7.79049	2.73792	5.37201	6.12202	6.94188	9.66591	5.85266	11.0421	7.48699	4.5294	0.167836	3.34758	5.72366	0.263168	4.11487
TCGA-77-A5GF-01A-21R-A27Q-07	2.12616	7.10155	9.73994	5.27486	6.57604	7.4183	1.75247	11.0746	9.94698	3.67887	4.38209	5.84064	8.67512	7.71115	7.57168	10.4703	6.5592	3.6798	0.921444	1.5321	6.37904	0.176972	4.74459
TCGA-77-A5GH-01A-11R-A27Q-07	2.76274	7.31794	10.1684	6.27513	2.46577	7.0118	2.85816	9.6519	8.20983	3.65788	6.07322	6.18215	8.05444	9.1274	6.50902	11.1216	7.33825	4.37628	0.431195	2.32071	6.12532	0	4.56922
TCGA-79-5596-01A-31R-1949-07	1.30451	7.04911	9.32839	5.26011	6.27097	8.3974	4.41153	11.1716	7.47847	3.17773	3.70098	6.92186	8.2746	8.93712	10.1717	11.7373	6.45269	5.54395	1.68303	1.17457	7.14761	4.25781	4.51296
TCGA-85-6175-01A-11R-1820-07	1.81062	8.30107	9.51127	5.06465	1.41792	6.95033	3.05633	11.0945	8.58374	2.63123	4.51307	5.11956	7.69797	8.86787	5.71098	10.9302	7.83828	4.51164	0.558425	4.39557	6.4717	0.51096	5.99188
TCGA-85-6560-01A-11R-1820-07	1.96562	6.20378	8.90645	5.50608	4.77076	6.28387	4.43294	7.60669	8.11973	3.96963	5.0154	7.72911	8.58585	8.20807	8.25155	10.716	7.72247	4.13207	0.242863	3.54009	7.10535	0.209295	7.99006
TCGA-85-6561-01A-11R-1820-07	1.13441	7.17306	8.86367	4.61966	6.04242	7.56586	3.83637	10.3759	8.01878	3.15859	4.66031	5.6963	7.1559	9.0975	7.91319	10.9585	7.76279	4.71181	0.31104	4.08246	6.73485	0.818112	5.3125
TCGA-85-6798-01A-11R-1949-07	1.49802	8.04254	9.56597	4.874	5.74792	8.56517	3.00187	11.7225	8.95764	3.21165	4.42984	6.20749	8.6207	7.86263	9.98562	11.7185	5.52969	3.7345	1.0676	2.30905	6.23132	0.257138	3.17093
TCGA-85-7696-01A-11R-2125-07	1.59833	7.39603	9.7972	4.9525	4.75407	7.70435	4.3603	11.1343	7.59184	4.62347	5.08343	7.40054	7.48768	9.21183	7.71556	11.1484	7.75538	3.89304	1.4034	2.62653	6.21169	3.86614	4.34746
TCGA-85-7697-01A-11R-2125-07	2.03426	8.4421	9.95573	4.88975	2.59954	7.75247	5.89625	11.2622	7.5034	3.05837	4.99428	6.14231	7.47113	8.68149	7.76389	11.0678	7.58173	4.39092	0.764843	2.82736	6.72904	4.01707	4.46338
TCGA-85-7698-01A-11R-2125-07	2.01355	7.53541	9.67147	5.83288	6.955	9.37513	2.44151	10.9356	7.37278	3.12513	5.11711	6.75558	7.94769	8.89071	8.50202	11.5274	7.4852	4.44388	1.70586	2.2902	6.97466	3.8306	5.27049
TCGA-85-7699-01A-11R-2125-07	3.0364	6.66669	9.46563	4.97358	1.41011	5.57955	5.14629	9.32053	8.60805	4.57854	4.43073	6.9177	7.04601	8.53972	8.39328	11.094	7.03791	5.2888	0.511204	2.83276	6.82349	0.451605	6.54565
TCGA-85-7710-01A-11R-2125-07	2.61243	8.39465	10.3085	5.17802	2.32843	7.40274	4.33207	10.7351	7.29799	3.32454	4.77962	6.37492	8.50922	9.15788	7.91288	11.9653	7.27392	4.30881	0.377244	2.04455	6.6292	0.593583	5.04925
TCGA-85-7843-01A-11R-2125-07	1.72681	7.34871	9.0888	5.79033	4.03224	7.58104	4.09663	11.6538	8.28755	3.97029	4.38037	5.7478	8.27096	9.35627	9.02246	11.6073	7.29333	4.87578	2.70126	1.87852	6.8915	1.37076	5.65694
TCGA-85-7844-01A-11R-2125-07	2.75392	8.04299	9.95553	5.43996	7.11065	8.31962	3.81787	10.8346	7.89226	3.3696	4.65171	6.89157	8.08359	10.8689	10.0676	10.0163	6.98534	4.75054	1.21216	2.69285	6.31554	0.397312	5.32018
TCGA-85-7950-01A-11R-2187-07	2.63139	7.60609	10.3903	5.43601	3.33487	7.04141	5.70043	11.3431	9.17971	4.21895	5.31342	6.12073	6.96276	7.95543	9.32496	10.7467	6.60981	4.2781	1.56202	2.48258	6.6565	0.782947	5.38211
TCGA-85-8048-01A-11R-2247-07	2.34748	7.08228	9.92447	4.88813	1.8404	7.01683	5.85038	8.85955	7.63563	3.22126	4.78245	5.99891	7.1665	9.35381	6.16649	10.4274	7.58404	4.50983	0.509592	4.12744	6.40021	1.10665	5.6055
TCGA-85-8049-01A-11R-2247-07	1.37976	7.5032	9.27502	4.57794	5.75543	6.79913	4.41344	10.6073	8.03379	2.96453	3.86722	5.94905	7.87406	9.03186	7.92097	10.5828	7.29246	4.77993	0.261631	2.69583	5.66506	5.18569	4.91288
TCGA-85-8052-01A-11R-2247-07	1.87238	7.83834	10.0689	5.071	6.6675	7.80429	3.20254	11.5742	9.42479	3.17626	3.94118	7.11122	8.41374	7.78074	8.33949	11.5965	6.7791	4.10913	1.90774	3.39379	6.61083	0.487251	4.30328
TCGA-85-8070-01A-11R-2247-07	1.83786	6.2019	9.60909	5.07908	6.43229	8.36593	1.41934	12.0837	8.34268	3.20676	4.10063	6.68324	8.42107	9.01037	9.75222	11.7807	5.3477	4.27196	2.41882	0.626	6.75471	4.19463	3.93013
TCGA-85-8071-01A-11R-2247-07	2.89445	7.41231	9.64199	5.05712	6.02568	9.40843	1.624	11.665	7.25965	3.50298	5.37331	7.05926	7.85735	9.79113	7.11365	11.362	7.7544	3.47586	0.723701	0.594728	7.01448	6.48119	5.69157
TCGA-85-8072-01A-31R-2247-07	2.16402	7.18591	9.44904	4.65903	6.45754	8.59691	2.81395	11.5999	8.23261	4.24759	4.83146	7.42034	8.17099	9.36397	7.44705	10.7963	7.08007	4.02063	1.24609	3.11196	6.72048	4.19444	4.40749
TCGA-85-8276-01A-11R-2296-07	1.7347	6.52083	9.11527	5.68949	1.34174	7.11816	5.83951	8.77567	7.84095	3.81382	4.41944	5.77789	7.76761	8.62869	8.98756	12.0034	6.65814	3.97808	1.46985	4.16116	6.58061	0.393486	4.34347
TCGA-85-8277-01A-11R-2296-07	1.15086	7.35971	9.55292	5.19616	6.30517	8.08321	2.781	11.3256	8.83601	4.42276	4.85646	7.54486	8.96775	9.64044	9.60422	11.5818	7.04059	5.21772	1.29044	1.57467	6.5657	0.0288797	4.64886
TCGA-85-8287-01A-11R-2296-07	1.95635	6.6322	9.23377	5.11242	1.65721	6.31838	4.83851	11.4648	7.9413	3.67116	4.27389	6.26483	6.56175	8.88327	7.3727	11.0657	7.29546	4.25565	0.476064	4.19731	6.14768	0.461011	5.17348
TCGA-85-8288-01A-11R-2296-07	1.98611	7.66195	9.45248	4.94402	1.33076	5.75045	7.65937	10.6907	9.19186	3.19778	5.83214	7.69656	7.63291	8.04074	7.90832	10.8881	7.13924	4.38607	2.46575	2.63206	6.84657	0.159757	4.97342
TCGA-85-8350-01A-11R-2296-07	1.32959	7.12849	9.74299	4.92613	1.33761	6.57243	5.67852	10.8256	7.56698	2.93585	4.37755	6.00181	8.4108	8.45135	6.83828	10.8346	7.43014	4.91553	1.8594	2.73649	6.88305	2.87828	4.60304
TCGA-85-8351-01A-11R-2296-07	2.57283	8.10682	9.75524	5.55901	2.84763	6.60886	3.59055	10.4634	7.81508	3.71782	4.79751	7.12587	7.7453	9.09747	8.81007	11.7442	7.00431	4.24126	0.415165	3.49164	7.00458	1.05226	6.55595
TCGA-85-8352-01A-31R-2326-07	2.48381	7.70053	8.90074	5.00959	1.74574	6.1334	3.0036	10.7667	9.26079	4.18167	4.71026	6.62192	8.06665	10.7208	7.94795	12.0768	6.43141	3.91323	1.84495	0.348249	6.88844	0.189805	4.25943
TCGA-85-8353-01A-21R-2296-07	1.62541	8.75807	10.3219	5.37045	3.51362	6.37008	2.31148	9.96565	8.60031	3.27539	4.12516	6.89743	7.56656	9.63668	8.32355	11.1785	6.59213	3.14484	0.741665	3.78314	6.53557	3.24673	5.55666
TCGA-85-8354-01A-31R-2326-07	2.05893	6.3802	9.93659	4.3519	6.7179	7.77551	3.90435	11.7313	8.32932	4.26594	4.18479	6.82967	8.69087	7.396	9.22489	11.4477	6.74946	4.34183	2.09785	1.27541	7.31712	2.88473	4.85068
TCGA-85-8355-01A-11R-2296-07	2.62189	7.76148	9.47999	5.18106	5.09236	8.37065	5.70313	11.0109	8.29775	3.37454	4.729	6.01933	7.97441	9.62073	7.8053	10.4571	7.67342	4.66599	0.612426	2.82417	6.63711	5.03841	5.24748
TCGA-85-8479-01A-11R-2326-07	2.25189	8.67972	8.91905	4.90496	2.2229	6.41126	0.792451	12.5412	7.84162	3.70278	3.83814	6.64666	8.46854	10.1645	7.30964	11.5873	6.4	3.65903	1.12332	0.396857	6.24028	1.14964	4.1315
TCGA-85-8481-01A-11R-2326-07	1.5946	8.43406	10.2732	5.73908	4.32481	6.52935	3.34112	11.7022	8.37752	2.39392	4.81386	6.47021	9.20976	9.15547	8.67566	11.2245	7.30579	5.12897	0.188425	2.16245	5.90985	0.368443	5.68792
TCGA-85-8580-01A-31R-2403-07	1.99544	7.8181	9.15368	5.52407	4.91138	9.50552	4.89848	10.8462	8.13344	3.88971	4.26569	7.59937	7.70644	8.73746	8.08531	11.2027	6.80929	4.13406	1.47296	3.45402	6.82379	1.70688	4.92429
TCGA-85-8582-01A-21R-2403-07	2.08457	8.50081	9.7339	5.86765	1.42335	6.61429	4.50027	11.8705	8.23519	4.05527	4.43905	6.22002	7.5532	8.524	7.46753	10.8292	7.30656	4.71116	0.134806	3.51926	6.23667	0.23723	5.86303
TCGA-85-8584-01A-11R-2403-07	1.66641	7.87514	9.77328	5.24802	4.83297	5.70401	3.42741	8.8549	8.07035	4.00974	4.59315	5.68031	7.07769	10.1435	4.464	11.2462	6.43719	3.9215	0.128323	2.51259	5.68667	1.18105	4.72116
TCGA-85-8664-01A-11R-2403-07	2.39436	6.85231	10.054	4.78861	1.34306	5.14392	5.11701	10.383	9.35902	3.66525	5.56916	6.91791	7.46595	9.5737	9.97887	11.4509	6.44156	3.97226	1.22506	0.583436	6.7649	0.938679	5.18646
TCGA-85-8666-01A-11R-2403-07	1.3159	8.06831	9.8145	5.40861	6.09273	7.17417	5.37376	11.6317	8.568	3.81085	4.99615	7.29117	8.2818	9.46677	8.85653	11.1965	7.87356	5.85306	0.572557	2.87897	6.60416	1.19429	5.83504
TCGA-85-A4CL-01A-41R-A26W-07	1.29504	6.70446	8.61351	4.56921	3.2983	7.03706	3.66019	12.1246	8.92486	2.56531	4.25512	6.75631	8.75319	9.62517	8.03684	10.4665	6.24344	2.88074	0.498552	0.907825	5.96425	0.0762698	4.03032
TCGA-85-A4CN-01A-11R-A24H-07	1.74892	7.44052	9.90072	5.36675	5.60716	7.83714	3.26298	11.9848	9.63289	3.55023	4.35851	7.30319	8.61504	9.55872	11.2486	11.2404	6.42146	4.69423	1.64782	3.55794	6.64236	2.32111	3.98615
TCGA-85-A4JB-01A-51R-A262-07	2.442	8.25749	9.77323	5.10892	2.10581	6.03347	3.94063	11.2941	8.33221	3.00837	4.50219	5.53717	6.97518	8.64734	8.23039	10.8828	6.77519	3.87345	0.311562	1.39106	6.08794	1.88831	5.19069
TCGA-85-A4JC-01A-11R-A24Z-07	1.92045	7.7063	9.43469	5.00084	1.27588	5.98585	3.75515	13.2925	7.94553	2.48866	3.60749	6.38454	7.22535	10.3209	7.15242	11.4767	5.98955	3.38426	0.185532	2.58304	5.86789	3.20838	3.78207
TCGA-85-A4PA-01A-11R-A24Z-07	2.7043	6.70025	8.08345	4.10789	1.25183	5.34432	1.39703	8.39885	8.29223	4.72695	4.09888	5.98337	5.57239	8.8114	5.65338	11.1551	6.86871	3.01184	0.373919	3.67656	6.29564	1.93901	4.75671
TCGA-85-A4QQ-01A-41R-A262-07	2.08458	8.18916	8.99812	5.7777	1.23001	6.65042	4.78522	12.266	9.2239	2.56713	4.19505	5.81178	8.49042	8.66352	5.79902	12.501	6.89592	4.11823	0.544976	2.8286	6.14817	0.933082	3.16446
TCGA-85-A4QR-01A-11R-A24Z-07	1.92884	7.20731	8.91769	4.49383	2.47686	8.18969	5.17872	12.2621	8.50427	4.12993	3.75036	6.2071	7.44452	9.23592	8.16634	11.2455	7.20098	4.69337	1.91457	0.477751	6.64305	7.90319	4.66209
TCGA-85-A50M-01A-21R-A262-07	1.92414	8.86242	10.9293	4.25925	2.64291	6.38109	4.39949	10.226	8.12131	3.10418	4.90088	5.51868	7.9035	9.40102	5.65685	10.0042	7.34329	3.88478	0.422075	5.75367	6.31571	0.704868	6.24111
TCGA-85-A50Z-01A-21R-A262-07	1.53134	7.0346	8.83201	4.64236	3.12017	5.88594	2.80442	10.6898	9.10843	2.16263	5.29697	5.52082	7.5145	9.47563	9.12159	10.7641	7.19868	4.87041	0.157472	0.915878	5.43648	0.0787748	6.20518
TCGA-85-A510-01A-11R-A26W-07	2.47911	6.63432	9.72348	5.31336	2.73144	5.59446	8.76949	8.76842	7.74937	4.10411	4.78072	6.84692	7.53645	9.00142	7.43801	11.4237	6.70369	3.51154	0.812201	3.04933	6.70511	0.282575	5.28122
TCGA-85-A511-01A-21R-A262-07	2.13844	7.3183	9.77019	5.21291	4.51242	7.69648	4.01913	11.0447	7.85679	3.67362	4.73373	6.46156	7.8599	8.78746	8.28689	11.0743	7.96887	5.3735	0.803707	3.75651	6.47527	3.03854	4.93788
TCGA-85-A512-01A-11R-A26W-07	1.78021	7.92457	9.21239	5.61017	2.72689	8.74118	8.94191	12.7497	8.48663	3.58252	5.24402	7.32129	6.87225	8.96403	8.49555	12.1622	7.17968	4.35852	1.56018	3.04569	7.011	0.249542	4.46726
TCGA-85-A513-01A-12R-A26W-07	2.45341	6.18707	9.18579	5.02578	1.74753	5.17297	3.318	10.8172	8.53619	2.56303	3.97282	4.93641	7.02022	9.0312	5.08641	10.6293	5.98239	2.67305	0.291784	6.16125	4.9753	0.28872	4.5277
TCGA-85-A53L-01A-21R-A26W-07	1.85899	7.22515	9.2343	5.42145	2.8515	7.49408	7.93868	11.5982	7.9569	2.91377	4.24326	7.2983	6.93489	10.5227	8.01412	12.1214	6.04941	4.53949	0.846775	1.86411	6.48226	0.270284	4.64559
TCGA-85-A5B5-01A-21R-A26W-07	2.86692	6.512	9.22773	6.09587	6.64462	8.40295	3.97374	11.7103	9.16333	3.14641	3.99449	6.36434	8.319	9.9973	7.54543	11.7763	5.65263	2.81284	1.06	1.12903	5.96525	3.20929	4.77973
TCGA-90-6837-01A-11R-1949-07	1.63604	7.98374	8.89415	4.76244	2.86123	5.11726	4.65691	9.90629	7.34604	2.89527	3.7623	5.92682	7.43703	8.85511	7.45473	10.4578	6.33353	4.87109	0.182506	2.99651	6.36486	0.23471	3.37406
TCGA-90-7766-01A-21R-2125-07	2.3033	7.37944	8.9362	5.46407	2.15463	7.41646	4.12972	10.6893	7.95586	3.00797	4.59307	5.65566	8.09103	10.5678	7.6044	9.65966	7.80942	4.35273	0.300591	1.82178	6.64344	1.44947	4.1274
TCGA-90-7767-01A-11R-2125-07	2.44588	6.27345	9.8764	4.97296	1.63678	6.44814	1.77197	10.2124	9.58091	3.89607	6.01094	6.72013	5.57094	7.5213	8.06592	11.2842	7.20691	3.93783	1.23636	4.15216	6.89192	0.257154	6.85529
TCGA-90-7769-01A-11R-2125-07	1.78294	7.92209	9.59761	6.27717	5.98454	7.40755	2.4521	12.3766	8.66573	3.61535	4.60161	7.57398	9.47448	10.3096	8.85263	12.177	6.73167	4.42999	1.12449	0.780263	7.05451	0.172086	4.0239
TCGA-90-7964-01A-21R-2187-07	1.69447	6.92567	8.48531	4.8722	5.31678	6.44943	2.82965	9.67938	8.28451	2.54983	4.92759	7.16328	8.76141	8.14315	6.57322	10.5597	7.19243	4.50247	0.521926	2.74233	6.136	1.0619	4.57667
TCGA-90-A4ED-01A-31R-A24Z-07	2.91133	6.79528	7.78344	4.14586	0.976507	5.16578	2.03954	8.98943	7.13523	3.56607	3.1544	5.34915	5.62013	8.4764	7.08678	11.3207	6.30783	3.45159	0.742038	4.71975	5.89491	2.86828	3.28759
TCGA-90-A4EE-01A-11R-A24Z-07	2.69485	6.80241	9.26892	4.89993	1.94116	5.38492	4.60673	9.83204	8.73389	3.58341	4.93262	6.58058	7.41655	8.82312	7.69439	11.4955	6.77593	4.65936	1.39921	4.17284	7.12116	0.161364	4.94766
TCGA-90-A59Q-01A-11R-A26W-07	2.53471	7.27923	9.12236	4.8267	3.16899	6.44815	4.4701	9.12272	6.83739	2.78049	4.9642	4.95671	7.51212	9.74576	5.26102	11.1704	6.2667	3.03033	0.295434	2.37038	5.53336	0.491052	4.64778
TCGA-92-7340-01A-21R-2045-07	1.44839	7.29643	9.20578	5.30199	1.01418	7.27664	3.32765	10.3591	9.05101	3.11234	4.65239	6.44917	8.12094	9.33637	5.53179	10.979	7.32721	4.55727	0.535718	3.76565	6.72017	1.93858	4.8561
TCGA-92-7341-01A-31R-2045-07	1.35086	7.33196	10.0493	5.6326	6.86672	8.41292	2.16531	11.5007	7.88755	4.24397	4.17963	6.20046	8.20046	8.19516	9.81084	11.3103	7.35362	4.7083	1.17798	3.03673	6.2591	0.288694	4.58268
TCGA-92-8063-01A-11R-2247-07	2.53318	7.2433	9.6759	5.37037	5.12984	6.47704	3.67038	11.5611	8.18648	3.37135	5.22887	6.50186	9.27265	10.1221	7.51569	11.1923	7.27794	4.21448	0.772544	2.49594	7.04802	1.6645	4.7427
TCGA-92-8064-01A-11R-2247-07	1.32964	7.49189	9.22847	5.83724	5.91173	6.78799	3.48527	10.7544	8.12204	3.64948	4.08993	6.80128	7.97147	8.6275	7.67606	11.3209	6.82208	4.37592	0.916549	3.25214	6.31878	0.494222	5.16046
TCGA-92-8065-01A-11R-2247-07	1.91967	6.5786	9.26899	4.73216	2.14431	4.80907	3.17507	11.177	7.29675	2.26465	4.52926	5.48257	7.0992	7.71546	5.93045	11.0648	7.08959	4.39211	0.251248	2.33686	6.39321	1.30464	3.717
TCGA-94-7033-01A-11R-1949-07	2.49132	7.12429	8.37047	4.03426	1.03365	6.43494	7.61932	12.7263	7.84341	2.69635	3.26737	6.81372	7.29819	8.8652	5.0907	10.9956	6.17335	2.90354	0.452436	1.53664	5.93217	2.04001	2.53137
TCGA-94-7557-01A-11R-2125-07	2.14215	6.79812	9.56327	5.62137	7.16546	6.97849	7.32616	10.8959	7.87677	3.26605	5.89264	7.4917	7.90939	8.20837	7.34116	11.1919	8.93381	4.32746	1.68239	2.31603	7.43372	1.82538	5.22289
TCGA-94-7943-01A-11R-2187-07	1.56914	7.03488	8.68192	5.06938	4.76016	6.46764	6.1378	9.76855	7.76303	3.30385	5.28873	6.77604	7.39315	9.13447	8.15632	10.5835	7.11146	3.99617	0.706741	3.24889	7.28525	3.6012	4.34922
TCGA-94-8035-01A-11R-2247-07	1.4628	8.31768	9.86798	5.48665	2.6403	7.43011	3.67197	11.7253	9.16173	3.27061	4.52998	7.69898	8.48047	9.29672	9.29531	11.4404	6.1067	4.91068	1.06385	2.6328	7.03504	2.0543	4.45051
TCGA-94-8490-01A-11R-2326-07	1.41217	8.19569	9.60499	5.09635	7.01423	8.41708	4.87508	11.6237	8.24073	3.22106	4.67828	7.59235	7.24409	11.0641	8.05156	11.137	7.34162	4.71368	0.644381	1.64252	6.72104	0.335602	4.13065
TCGA-94-8491-01A-11R-2326-07	3.46978	7.19429	9.01582	4.84019	4.00193	7.31765	1.32047	11.9775	8.75983	3.6482	4.84829	5.53818	9.00983	9.98339	6.42855	11.3239	7.27277	4.29538	0.844443	2.68729	6.67889	3.03045	4.78231
TCGA-94-A4VJ-01A-11R-A24Z-07	2.62544	8.2217	8.96047	5.01044	2.75344	7.0174	3.34856	11.7955	8.72178	3.74871	4.36497	5.35048	8.07346	8.15035	7.21568	10.9515	7.16209	4.4998	0.860172	1.73316	5.68756	2.87084	4.01288
TCGA-94-A5I4-01A-11R-A26W-07	1.99448	7.09804	9.84031	6.19939	3.78247	8.82905	6.64979	11.0643	8.40256	3.63486	5.20062	7.12512	8.19539	9.7868	9.74802	11.6343	6.69655	5.32791	2.04366	5.14638	6.74128	0.656639	5.08354
TCGA-94-A5I6-01A-21R-A27Q-07	2.3841	7.45368	9.71007	6.01989	7.05808	7.63165	3.28069	11.4156	8.71666	3.59923	4.82452	6.04427	9.45422	8.53145	9.75853	10.7737	7.20302	5.07131	0.664914	2.52778	6.13997	0.0308062	4.23333
TCGA-96-7544-01A-11R-2045-07	2.57853	6.78388	9.1823	5.25164	2.84676	8.23484	3.99966	9.88966	7.91109	3.45253	5.35003	5.2905	8.61422	9.46719	7.79196	10.8222	7.62996	5.92812	1.18204	3.17973	7.16972	5.77075	5.0664
TCGA-96-7545-01A-21R-2045-07	1.86995	7.12919	9.88874	5.10784	5.82553	8.43208	2.76993	10.8383	8.37272	2.91124	4.26786	6.83435	7.6672	9.5809	8.90251	10.6937	7.62965	4.90691	1.63043	4.54107	6.90878	0.639933	6.11079
TCGA-96-8169-01A-11R-2296-07	1.9346	7.76563	8.80654	5.3536	4.64829	6.89482	2.46758	10.9286	8.35957	2.35898	4.7339	5.26658	8.48626	10.2219	6.8897	11.3076	7.62751	4.98583	0.291389	2.76723	6.551	3.6915	5.52322
TCGA-96-8170-01A-11R-2296-07	2.53434	6.9661	8.35505	5.05688	0.998301	7.58237	4.16336	12.852	8.14532	3.40233	3.9359	5.95089	8.35905	9.83235	7.15001	10.9581	7.01377	4.48936	0.619394	3.1427	6.37269	5.35461	4.54083
TCGA-96-A4JK-01A-11R-A24Z-07	2.47955	6.57975	10.2039	5.2893	5.99046	8.78104	4.17344	10.0215	8.81484	4.21235	4.82154	7.48148	7.45046	9.46587	9.53946	10.9048	6.77447	5.18708	2.55388	4.09299	6.44099	2.88792	4.16781
TCGA-96-A4JL-01A-11R-A24Z-07	1.10882	7.59349	9.12941	5.00548	2.79495	5.7181	2.63566	10.3544	9.05794	3.83381	4.40253	6.38851	7.27083	8.90027	5.54638	10.8896	7.59694	3.10099	2.19501	2.53121	6.62325	4.37247	4.88127
TCGA-98-7454-01A-11R-2045-07	2.38265	7.36908	9.66666	5.29252	2.28573	6.52795	4.97915	8.04938	7.09293	3.26404	5.07526	6.06593	6.78596	10.5729	7.89358	10.3088	7.95791	4.25625	0.218745	5.06206	6.58438	1.42153	7.36236
TCGA-98-8020-01A-11R-2247-07	2.50564	9.12353	9.2893	5.82152	3.39429	6.64941	3.2247	11.6269	7.70983	4.28947	4.89216	5.83017	8.91208	8.41636	7.62385	11.7144	7.13064	4.48066	0.0987902	3.52208	5.99942	0.573938	5.60595
TCGA-98-8021-01A-11R-2247-07	2.56922	8.74496	10.2724	5.54133	1.97854	8.30584	5.4392	11.4277	8.11501	2.84698	3.75928	7.25646	7.51125	9.30653	7.87251	10.7228	6.93628	5.09961	0.747283	3.20791	6.63709	2.29907	4.71088
TCGA-98-8022-01A-11R-2247-07	1.93632	8.04087	8.53391	5.10632	1.46862	6.78334	4.05616	10.56	8.17909	2.60706	4.65988	5.48991	7.38607	9.31761	5.18983	10.5197	6.89025	3.8015	0.52171	3.47282	6.23934	2.72635	4.76756
TCGA-98-8023-01A-11R-2247-07	1.76007	6.62018	9.43982	4.99343	2.30377	6.14242	5.51471	10.4763	8.51916	3.16605	5.19871	5.36434	7.79581	8.04472	6.60536	10.8663	7.48284	4.7707	1.65228	3.51866	6.86889	0.351378	4.48404
TCGA-98-A538-01A-11R-A262-07	2.98356	7.7913	9.56328	5.61217	2.83918	8.76545	6.50206	11.9263	8.72754	4.0759	4.42846	6.92263	8.17845	10.2524	8.65745	11.2923	6.94347	4.92665	0.573846	2.77979	6.56859	4.82986	5.36179
TCGA-98-A539-01A-31R-A262-07	1.61316	8.24773	9.02872	5.09338	7.63344	6.64465	3.34132	10.4066	7.92722	2.78904	3.24719	5.95106	8.47723	8.86101	7.45702	11.0484	6.55431	4.15866	0.224361	3.27708	6.67971	0.459709	4.90385
TCGA-98-A53A-01A-11R-A262-07	2.63493	5.87154	9.09296	5.58353	6.52641	9.2418	2.84929	10.2428	7.31728	3.92477	4.02765	7.53901	8.10092	9.6353	9.42395	10.6589	6.30006	4.99071	0.512357	1.49904	6.03587	1.98939	3.90081
TCGA-98-A53B-01A-11R-A262-07	3.06033	7.09311	8.98897	5.22271	3.29256	6.42494	3.5349	9.62266	7.65733	4.31623	4.54599	5.22791	9.2186	9.28569	7.66226	10.4793	8.14233	5.07352	1.24922	3.2143	6.40628	2.18587	5.22557
TCGA-98-A53C-01A-11R-A262-07	2.23587	7.68757	8.75672	4.76641	1.48738	6.15289	3.9843	8.79767	7.61965	2.63609	4.02653	5.56566	6.70232	9.60424	6.7371	10.0869	6.88308	4.14378	0.590062	4.70667	5.79878	0.577028	6.06613
TCGA-98-A53D-01A-32R-A262-07	2.04203	8.6627	8.74312	4.67624	1.0829	6.30612	3.8415	9.39269	8.12356	2.17847	4.736	5.28587	6.44665	10.5974	6.31795	10.6523	7.05429	4.14556	0.463476	5.79029	6.21871	0.72502	7.03078
TCGA-98-A53H-01A-12R-A262-07	2.06973	8.00834	9.05159	4.88463	4.22076	6.73349	3.40915	9.9445	8.3888	2.81216	4.49534	5.81467	6.77129	9.61693	6.25355	10.6187	7.3713	3.88721	0.54976	3.98116	5.97761	6.55697	5.66968
TCGA-98-A53I-01A-31R-A262-07	1.91948	6.23197	8.94215	4.87967	6.33722	7.42886	2.11389	11.3379	8.05379	3.18295	4.77527	7.06648	7.60513	10.4934	7.89551	10.2458	7.62486	3.73267	1.17921	2.52124	6.35242	0.585774	4.18124
TCGA-98-A53J-01A-11R-A26W-07	1.8969	7.86925	9.22024	4.96435	5.00875	7.72376	2.43716	12.6316	7.09432	2.76018	4.25691	7.10421	7.5427	11.2532	8.74187	9.9408	6.53824	3.66007	0.0969967	3.08551	5.28706	0.117165	3.71626
TCGA-J1-A4AH-01A-31R-A24H-07	2.59279	6.7316	9.65944	5.44276	6.93019	7.87732	1.64854	10.3884	7.86007	3.46608	3.71124	6.52745	8.74799	7.48899	8.37543	11.3614	6.29168	3.69137	1.74524	1.59682	6.68641	1.29309	4.18616
TCGA-L3-A4E7-01A-11R-A24Z-07	2.58427	7.48964	8.75524	5.15501	0.963119	7.41061	2.91606	10.8166	8.56879	3.31597	3.85755	6.84083	7.72955	10.4205	6.10738	10.368	7.03048	4.18628	0.469492	3.33656	6.36592	8.78424	5.25943
TCGA-L3-A524-01A-11R-A262-07	1.85773	7.81005	11.5866	6.15269	5.87405	7.65079	2.78529	11.7828	8.96407	4.29996	4.30622	6.49827	7.8262	9.58103	9.01838	12.6767	6.33683	4.01189	3.26521	1.06986	7.20455	0.269077	3.80314
TCGA-LA-A446-01A-21R-A24Z-07	2.58488	7.09274	9.44974	4.80673	7.15959	8.68808	2.10904	12.4025	8.33854	3.37256	4.0419	7.26594	8.35645	10.3727	8.74545	11.3269	7.30946	3.63087	1.00416	2.24948	6.83408	1.20319	5.12806
TCGA-LA-A7SW-01A-11R-A405-07	3.70295	8.75546	10.4164	5.32338	4.61778	5.57624	1.87985	9.93358	8.05582	4.03934	5.75417	5.90393	6.81938	8.79876	3.93468	11.9695	7.3902	4.22042	0.251828	2.62628	6.3731	0.19867	4.82769
TCGA-MF-A522-01A-11R-A262-07	1.08387	7.39164	10.05	4.51439	6.35808	7.11562	2.08338	10.0471	8.03704	3.3145	4.1435	6.39028	8.73625	8.70843	9.28263	12.0633	6.45817	5.63081	0.881336	2.24923	6.28836	1.58204	4.99796
TCGA-NC-A5HD-01A-11R-A26W-07	2.64065	5.26836	10.3048	6.55943	5.22981	7.63824	5.22173	11.3826	7.78541	4.09998	4.57851	6.6198	7.57072	9.38312	7.47167	12.0832	5.74433	3.50263	0.540386	0.636446	6.8202	2.90712	4.1641
TCGA-NC-A5HE-01A-11R-A26W-07	2.22302	6.9541	8.75504	5.04903	4.16669	7.40147	6.07409	11.4035	7.25003	3.03067	5.02403	5.9271	8.38155	10.766	8.04479	10.7737	6.71209	3.14169	0.469762	2.67774	6.67746	1.20851	4.35135
TCGA-NC-A5HF-01A-11R-A26W-07	2.50137	8.22501	9.52907	6.72886	5.34542	7.31317	4.77929	11.2128	8.57573	3.4328	4.38986	7.39838	8.26051	9.29866	6.24221	11.5998	7.09656	4.19726	0.408755	2.11599	6.11311	1.92985	4.25085
TCGA-NC-A5HG-01A-11R-A26W-07	2.28661	8.01694	8.26098	6.39131	2.29934	6.66584	2.77468	11.9735	6.7973	3.56919	5.26645	5.65698	8.18485	8.04975	6.09449	12.4762	7.03013	4.95136	1.90271	0.33036	6.96617	0	2.98769
TCGA-NC-A5HH-01A-11R-A26W-07	2.90574	4.20263	9.36622	5.07042	0.477913	5.02082	5.91763	9.85025	8.41183	4.13876	4.34979	7.47341	6.97784	7.89727	8.56776	12.0883	6.33531	4.51804	1.07402	1.32	7.30941	0.0653865	6.19007
TCGA-NC-A5HI-01A-11R-A26W-07	3.11584	7.03453	8.67072	4.77758	2.35076	8.0382	4.01007	12.4839	7.46434	3.38912	4.25664	7.15413	7.18485	10.8405	7.15651	10.7299	6.54146	4.33381	0.386499	0.603602	6.62875	4.27783	4.3925
TCGA-NC-A5HJ-01A-11R-A26W-07	2.14502	6.64423	8.44408	5.45763	1.98066	6.48081	5.7104	9.16051	8.1895	3.48136	4.60014	6.82709	6.51969	9.60683	7.3619	10.5878	7.12216	4.15697	0.431242	3.51611	6.3233	1.74512	7.29481
TCGA-NC-A5HK-01A-11R-A26W-07	1.8266	7.56428	10.6161	5.50382	1.78128	6.55522	2.52683	11.1125	8.48118	5.39616	4.59285	7.20329	7.67615	11.1616	5.36052	11.5526	7.04885	3.05385	0.970894	0.737391	6.74813	0.306809	3.90193
TCGA-NC-A5HL-01A-11R-A26W-07	1.25012	6.71591	9.17556	4.74082	5.89181	8.24203	3.84368	10.9639	8.48928	4.26884	5.2396	5.34675	8.28843	9.27035	8.87914	11.2923	6.61103	3.79639	1.49913	1.93729	6.48469	0.137634	4.95321
TCGA-NC-A5HM-01A-12R-A26W-07	2.18762	7.55415	9.41571	5.12738	2.42548	6.32394	3.55635	10.5157	8.08774	3.08497	4.59313	6.80601	7.68194	10.739	6.66179	11.1113	6.67808	3.30878	0.654835	0.875513	6.22616	7.30821	5.11213
TCGA-NC-A5HN-01A-11R-A26W-07	1.96457	7.40949	10.0223	5.57412	5.95219	8.45233	1.63847	11.2366	7.5545	3.4965	5.13714	7.77362	8.52987	7.68581	7.9546	12.1546	6.79307	4.34657	1.33974	1.22408	6.76126	3.42775	5.861
TCGA-NC-A5HO-01A-11R-A26W-07	2.4162	6.03648	9.1585	5.15587	2.32238	8.56096	4.22214	12.5971	8.07	2.99049	4.42264	7.80529	8.09086	11.6511	8.54088	11.1323	7.46253	4.76227	0.53945	0.41489	6.35259	1.28703	5.05576
TCGA-NC-A5HP-01A-11R-A26W-07	2.19127	8.66589	11.0487	5.88237	2.0327	8.06328	4.94728	10.9222	8.04873	2.88613	4.69456	6.13446	6.52175	9.69846	6.34307	11.3259	7.4546	4.20333	0.878888	2.54492	6.36377	1.23928	4.46734
TCGA-NC-A5HQ-01A-11R-A26W-07	2.7092	6.26734	8.79293	5.30959	3.35778	8.08034	4.76219	12.407	7.41946	3.26837	5.0464	6.29283	7.55501	10.8165	6.7109	11.3129	7.67573	4.72159	1.227	1.59135	6.82628	3.58914	4.99718
TCGA-NC-A5HR-01A-21R-A26W-07	1.94624	5.73367	9.09506	5.66408	6.00069	6.62055	3.6914	11.586	7.99178	3.70844	4.49658	6.78491	7.1202	10.6034	8.55466	10.9984	6.98156	3.45656	0.572836	0.629377	6.64324	4.87876	4.96535
TCGA-NC-A5HT-01A-11R-A26W-07	3.79795	7.43003	9.62552	6.09477	2.45798	8.6324	0.948405	10.9137	8.46266	4.15032	4.24793	5.85694	8.41666	9.88771	5.88943	11.6409	5.19939	4.31842	1.66677	0.752277	6.44507	6.11833	4.00493
TCGA-NK-A5CR-01A-11R-A26W-07	1.52832	6.23369	10.037	5.824	6.95645	7.91287	3.73988	11.6625	8.3188	3.22499	4.56991	6.99932	8.2258	10.6789	12.0648	11.5176	5.80241	4.98776	1.52317	1.23619	6.29745	5.67605	4.51164
TCGA-NK-A5CT-01A-31R-A26W-07	2.58351	8.10671	9.67594	5.2113	2.76884	6.29436	4.3441	11.3023	8.35775	3.85228	6.02565	6.36209	8.08337	10.6087	5.4851	11.2068	7.19862	4.59216	0.278619	1.73706	6.16138	0.119536	5.9373
TCGA-NK-A5CX-01A-11R-A26W-07	2.04516	8.64978	9.71738	5.60064	0.664061	6.98573	4.33842	11.595	8.0357	2.70237	4.53249	7.0318	8.21445	10.0639	6.35799	11.6081	7.39095	3.84687	0.621296	3.06495	6.05006	3.51092	5.14975
TCGA-NK-A5D1-01A-11R-A26W-07	2.55209	5.25227	9.5775	5.10716	0.80876	5.4602	6.4144	8.91442	7.84013	3.78136	4.61963	7.89273	6.42588	7.93911	9.29975	11.4297	6.38978	3.97737	1.58862	3.77191	6.91686	0.453316	4.95643
TCGA-NK-A7XE-01A-12R-A405-07	2.11164	6.71937	8.76326	4.91879	4.61556	7.54371	4.91363	11.5309	8.04413	2.76526	6.05157	6.88603	8.07031	10.6366	7.52258	11.1627	6.90369	4.49958	0.164317	1.64121	5.57241	0.287037	3.50428
TCGA-O2-A52N-01A-11R-A26W-07	3.40552	6.94469	9.98872	5.4773	3.66327	7.88045	2.5076	10.9295	8.12277	3.86939	4.11537	5.73162	8.06466	8.97535	7.08567	11.9654	6.36474	4.18223	0.467605	2.24988	6.00464	0.571378	4.64831
TCGA-O2-A52Q-01A-11R-A26W-07	1.87177	7.88232	9.73395	5.88305	4.88724	5.79443	5.90275	11.4647	9.56907	3.01623	5.19783	4.93447	6.80035	10.5483	6.74524	12.4646	7.03849	2.78318	0.263517	5.16211	6.95575	0.0853535	5.33519
TCGA-O2-A52S-01A-11R-A262-07	2.71805	5.56023	10.201	5.42957	7.34553	8.60586	3.10737	9.25533	9.14762	4.37451	5.17598	6.36686	8.49371	10.1558	10.0642	11.3754	7.57129	4.60201	1.47851	2.56047	7.261	0.426862	4.96939
TCGA-O2-A52V-01A-31R-A262-07	2.15423	7.23688	9.75544	5.47591	3.3822	8.27611	5.29613	11.696	7.75444	3.63559	5.31815	7.2171	7.9984	10.4511	10.1809	10.7395	7.29445	4.96416	1.52199	2.08651	6.64923	7.13369	5.47797
TCGA-O2-A52W-01A-11R-A26W-07	1.47506	6.3516	9.51813	5.52676	2.13175	7.83715	4.43641	11.606	7.59506	3.66542	4.03875	6.6253	7.23444	10.7285	6.28397	10.9913	6.05306	4.6244	0.120332	1.34537	5.4645	0.722488	4.3411
TCGA-O2-A5IB-01A-11R-A27Q-07	3.58858	6.7196	9.01012	5.13308	2.99448	7.05375	5.72133	9.10028	8.6193	3.90422	4.18853	7.59833	6.39571	8.97542	8.06139	10.447	6.38473	4.68332	1.5195	0.679905	7.13983	1.61434	5.08237
TCGA-XC-AA0X-01A-32R-A405-07	1.84461	7.86752	8.90016	4.806	5.11131	7.01213	4.12143	10.5806	7.6686	3.36057	3.86731	6.95159	7.68467	9.97471	7.90559	10.4632	7.49172	4.16144	1.48943	3.51126	6.60919	4.56877	5.9148

## Sheet: Correlations in LUSC
Genes	Cor	abscor	Pvalue
CDKN1A	-0.0446887	0.0446887	0.317665
HSPA5	0.0687571	0.0687571	0.123925
EMC2	0.176759	0.176759	6.8378e-05
SLC7A11	-0.121712	0.121712	0.00632646
NFE2L2	-0.0236386	0.0236386	0.597232
MT1G	-0.0137643	0.0137643	0.758357
HSPB1	-0.156696	0.156696	0.000425278
GPX4	-0.0865556	0.0865556	0.0526095
FANCD2	0.207446	0.207446	2.76713e-06
CISD1	-0.135152	0.135152	0.00240916
FDFT1	-0.011907	0.011907	0.790142
SLC1A5	0.0300622	0.0300622	0.501566
SAT1	0.0233884	0.0233884	0.60112
TFRC	-0.00979845	0.00979845	0.826653
RPL8	-0.158821	0.158821	0.000353891
NCOA4	-0.134318	0.134318	0.00256455
LPCAT3	-0.0130423	0.0130423	0.770668
GLS2	0.0284628	0.0284628	0.524608
DPP4	-0.0615207	0.0615207	0.168741
CS	0.0817798	0.0817798	0.0671297
ALOX15	0.0310704	0.0310704	0.487321
ACSL4	0.0214917	0.0214917	0.630954

## Sheet: Correlation-Spearman-LUSC
rowname_id	ZNF419	CDKN1A	HSPA5	EMC2	SLC7A11	NFE2L2	MT1G	HSPB1	GPX4	FANCD2	CISD1	FDFT1	SLC1A5	SAT1	TFRC	RPL8	NCOA4	LPCAT3	GLS2	DPP4	CS	ALOX15	ACSL4
ZNF419	1	-0.0446887	0.0687571	0.176759	-0.121712	-0.0236386	-0.0137643	-0.156696	-0.0865556	0.207446	-0.135152	-0.011907	0.0300622	0.0233884	-0.00979845	-0.158821	-0.134318	-0.0130423	0.0284628	-0.0615207	0.0817798	0.0310704	0.0214917
CDKN1A	-0.0446887	1	0.16025	0.039062	-0.0784318	-0.0465046	0.058176	0.202102	-0.0551345	-0.248825	-0.0831302	-0.00629394	0.00848847	0.110658	-0.102797	-0.0641148	0.0797855	0.0229289	-0.17726	0.179891	-0.174241	-0.010631	0.0917648
HSPA5	0.0687571	0.16025	1	0.163429	0.258375	0.132619	-0.0626751	0.00747406	0.0774204	0.180525	0.0334286	0.127399	0.198507	-0.0918535	0.202451	-0.0258955	0.0231471	0.152728	0.0609295	0.0732912	0.183293	-0.125014	0.0971936
EMC2	0.176759	0.039062	0.163429	1	0.218273	0.209571	-0.0236911	0.134729	0.0775937	0.268819	0.0705748	0.118914	0.212853	0.0730365	0.0914507	0.234103	-0.00631339	0.161991	0.0283704	-0.122213	0.173221	0.0334155	0.00604114
SLC7A11	-0.121712	-0.0784318	0.258375	0.218273	1	0.47514	-0.348126	0.153858	0.0562296	0.274514	0.0864002	0.251453	0.498234	-0.0377194	0.483185	0.0133092	-0.032673	0.131282	0.202783	-0.179985	0.176989	-0.0134894	-0.104726
NFE2L2	-0.0236386	-0.0465046	0.132619	0.209571	0.47514	1	-0.210802	0.418899	0.0195205	0.1957	-0.00445323	0.327328	0.383232	0.14108	0.447363	-0.0120683	0.0194914	0.319738	0.358842	-0.233086	0.259287	0.289424	-0.134941
MT1G	-0.0137643	0.058176	-0.0626751	-0.0236911	-0.348126	-0.210802	1	-0.159806	0.00979589	-0.0625434	0.142239	-0.0379287	-0.234401	0.0188381	-0.14929	0.0975294	0.103489	-0.0557124	-0.0471891	0.133135	-0.00306793	-0.0157203	0.145838
HSPB1	-0.156696	0.202102	0.00747406	0.134729	0.153858	0.418899	-0.159806	1	0.0814806	-0.0871434	-0.0407134	0.160028	0.254609	0.138183	0.163632	0.111009	-0.0833529	0.176711	0.0614119	-0.26971	-0.0416265	0.16735	-0.303122
GPX4	-0.0865556	-0.0551345	0.0774204	0.0775937	0.0562296	0.0195205	0.00979589	0.0814806	1	0.178195	0.137871	0.157864	0.115143	-0.0869458	0.144919	0.231805	-0.0178357	0.0427207	0.209412	-0.0834896	0.165575	-0.085164	0.00612699
FANCD2	0.207446	-0.248825	0.180525	0.268819	0.274514	0.1957	-0.0625434	-0.0871434	0.178195	1	0.0998941	0.318165	0.164756	-0.140797	0.422488	0.17073	-0.0972252	0.174533	0.351917	-0.216268	0.428332	-0.0697513	-0.0107611
CISD1	-0.135152	-0.0831302	0.0334286	0.0705748	0.0864002	-0.00445323	0.142239	-0.0407134	0.137871	0.0998941	1	0.0154274	0.0888884	0.0245646	0.0655751	0.238309	0.417108	0.127115	0.0553595	-0.0612392	0.105427	-0.0835147	0.179005
FDFT1	-0.011907	-0.00629394	0.127399	0.118914	0.251453	0.327328	-0.0379287	0.160028	0.157864	0.318165	0.0154274	1	0.156104	0.0590953	0.38778	0.0600845	-0.0259608	0.113559	0.217111	-0.16971	0.263813	0.12891	-0.0451448
SLC1A5	0.0300622	0.00848847	0.198507	0.212853	0.498234	0.383232	-0.234401	0.254609	0.115143	0.164756	0.0888884	0.156104	1	-0.0380231	0.330411	0.0731571	-0.0604494	0.256385	0.0782279	-0.232971	0.145142	0.0720819	-0.150984
SAT1	0.0233884	0.110658	-0.0918535	0.0730365	-0.0377194	0.14108	0.0188381	0.138183	-0.0869458	-0.140797	0.0245646	0.0590953	-0.0380231	1	-0.0279552	-0.181438	-0.017605	-0.0794426	-0.204606	-0.0703883	-0.178015	0.17152	0.0149729
TFRC	-0.00979845	-0.102797	0.202451	0.0914507	0.483185	0.447363	-0.14929	0.163632	0.144919	0.422488	0.0655751	0.38778	0.330411	-0.0279552	1	0.00458271	-0.123991	0.265623	0.402772	-0.235166	0.270815	-0.0119585	-0.0518917
RPL8	-0.158821	-0.0641148	-0.0258955	0.234103	0.0133092	-0.0120683	0.0975294	0.111009	0.231805	0.17073	0.238309	0.0600845	0.0731571	-0.181438	0.00458271	1	-0.0395022	-0.0131352	0.136317	-0.157771	0.21208	-0.0709113	-0.0501305
NCOA4	-0.134318	0.0797855	0.0231471	-0.00631339	-0.032673	0.0194914	0.103489	-0.0833529	-0.0178357	-0.0972252	0.417108	-0.0259608	-0.0604494	-0.017605	-0.123991	-0.0395022	1	0.301657	0.00308956	0.227546	0.108808	0.0708733	0.351412
LPCAT3	-0.0130423	0.0229289	0.152728	0.161991	0.131282	0.319738	-0.0557124	0.176711	0.0427207	0.174533	0.127115	0.113559	0.256385	-0.0794426	0.265623	-0.0131352	0.301657	1	0.1828	-0.030677	0.236537	0.158181	0.144169
GLS2	0.0284628	-0.17726	0.0609295	0.0283704	0.202783	0.358842	-0.0471891	0.0614119	0.209412	0.351917	0.0553595	0.217111	0.0782279	-0.204606	0.402772	0.136317	0.00308956	0.1828	1	-0.158925	0.490517	0.1178	-0.120516
DPP4	-0.0615207	0.179891	0.0732912	-0.122213	-0.179985	-0.233086	0.133135	-0.26971	-0.0834896	-0.216268	-0.0612392	-0.16971	-0.232971	-0.0703883	-0.235166	-0.157771	0.227546	-0.030677	-0.158925	1	-0.0692366	-0.0484712	0.308051
CS	0.0817798	-0.174241	0.183293	0.173221	0.176989	0.259287	-0.00306793	-0.0416265	0.165575	0.428332	0.105427	0.263813	0.145142	-0.178015	0.270815	0.21208	0.108808	0.236537	0.490517	-0.0692366	1	0.0356786	0.0415938
ALOX15	0.0310704	-0.010631	-0.125014	0.0334155	-0.0134894	0.289424	-0.0157203	0.16735	-0.085164	-0.0697513	-0.0835147	0.12891	0.0720819	0.17152	-0.0119585	-0.0709113	0.0708733	0.158181	0.1178	-0.0484712	0.0356786	1	0.0335974
ACSL4	0.0214917	0.0917648	0.0971936	0.00604114	-0.104726	-0.134941	0.145838	-0.303122	0.00612699	-0.0107611	0.179005	-0.0451448	-0.150984	0.0149729	-0.0518917	-0.0501305	0.351412	0.144169	-0.120516	0.308051	0.0415938	0.0335974	1

## Sheet: p value-LUSC
rowname_id	ZNF419	CDKN1A	HSPA5	EMC2	SLC7A11	NFE2L2	MT1G	HSPB1	GPX4	FANCD2	CISD1	FDFT1	SLC1A5	SAT1	TFRC	RPL8	NCOA4	LPCAT3	GLS2	DPP4	CS	ALOX15	ACSL4
ZNF419		0.317665	0.123925	6.8378e-05	0.00632646	0.597232	0.758357	0.000425278	0.0526095	2.76713e-06	0.00240916	0.790142	0.501566	0.60112	0.826653	0.000353891	0.00256455	0.770668	0.524608	0.168741	0.0671297	0.487321	0.630954
CDKN1A	0.317665		0.000312349	0.382473	0.079154	0.298378	0.193154	5.01713e-06	0.217514	1.60242e-08	0.0627244	0.888132	0.849531	0.0131093	0.0212474	0.151455	0.074097	0.608289	6.51479e-05	5.04396e-05	8.69952e-05	0.812188	0.0398562
HSPA5	0.123925	0.000312349		0.000235706	4.23913e-09	0.00290969	0.160875	0.867336	0.0831119	4.73963e-05	0.45487	0.0042502	7.42233e-06	0.039664	4.82843e-06	0.562691	0.60488	0.000595714	0.172879	0.100957	3.60306e-05	0.00503155	0.0294517
EMC2	6.8378e-05	0.382473	0.000235706		7.89462e-07	2.17426e-06	0.596418	0.00248694	0.0824225	9.29882e-10	0.114271	0.00765006	1.49117e-06	0.102151	0.0405433	1.12068e-07	0.887789	0.000267892	0.525955	0.00611237	9.5821e-05	0.455046	0.892598
SLC7A11	0.00632646	0.079154	4.23913e-09	7.89462e-07		0	8.88178e-16	0.000541657	0.208501	3.95386e-10	0.053037	1.11732e-08	0	0.399055	0	0.766109	0.465134	0.00321023	4.65489e-06	4.99771e-05	6.68731e-05	0.763038	0.018924
NFE2L2	0.597232	0.298378	0.00290969	2.17426e-06	0		1.88883e-06	0	0.662608	1.00276e-05	0.920719	5.32907e-14	0	0.00153006	0	0.787368	0.663081	2.14495e-13	0	1.27579e-07	3.72262e-09	3.83058e-11	0.00244769
MT1G	0.758357	0.193154	0.160875	0.596418	8.88178e-16	1.88883e-06		0.000324749	0.826698	0.161758	0.00139718	0.396442	1.0787e-07	0.673712	0.000792572	0.0288929	0.0203867	0.212723	0.291315	0.00280067	0.945334	0.725317	0.00104941
HSPB1	0.000425278	5.01713e-06	0.867336	0.00248694	0.000541657	0	0.000324749		0.0681393	0.0510184	0.362664	0.000318483	7.20744e-09	0.00191428	0.000231469	0.0128211	0.0620212	6.86885e-05	0.169497	8.14536e-10	0.351991	0.000165365	3.96216e-12
GPX4	0.0526095	0.217514	0.0831119	0.0824225	0.208501	0.662608	0.826698	0.0681393		5.95119e-05	0.00196051	0.000384538	0.00982333	0.0515487	0.00112965	1.50103e-07	0.69015	0.339466	2.21423e-06	0.0615929	0.000194335	0.0565415	0.891081
FANCD2	2.76713e-06	1.60242e-08	4.73963e-05	9.29882e-10	3.95386e-10	1.00276e-05	0.161758	0.0510184	5.95119e-05		0.025209	2.84661e-13	0.000209239	0.00156412	0	0.000121053	0.0293988	8.4618e-05	4.44089e-16	1.00074e-06	0	0.118569	0.809934
CISD1	0.00240916	0.0627244	0.45487	0.114271	0.053037	0.920719	0.00139718	0.362664	0.00196051	0.025209		0.730233	0.0465301	0.582943	0.142335	6.51165e-08	0	0.00433715	0.21564	0.170702	0.0181365	0.0615145	5.50011e-05
FDFT1	0.790142	0.888132	0.0042502	0.00765006	1.11732e-08	5.32907e-14	0.396442	0.000318483	0.000384538	2.84661e-13	0.730233		0.000447441	0.186199	0	0.178925	0.561707	0.0108894	9.06069e-07	0.000133078	1.93994e-09	0.00381405	0.312745
SLC1A5	0.501566	0.849531	7.42233e-06	1.49117e-06	0	0	1.0787e-07	7.20744e-09	0.00982333	0.000209239	0.0465301	0.000447441		0.395267	2.9754e-14	0.101585	0.176295	5.61721e-09	0.0799392	1.29469e-07	0.00110971	0.106724	0.000689055
SAT1	0.60112	0.0131093	0.039664	0.102151	0.399055	0.00153006	0.673712	0.00191428	0.0515487	0.00156412	0.582943	0.186199	0.395267		0.532032	4.33156e-05	0.693954	0.0753524	3.80387e-06	0.115234	6.05601e-05	0.000112443	0.737884
TFRC	0.826653	0.0212474	4.82843e-06	0.0405433	0	0	0.000792572	0.000231469	0.00112965	0	0.142335	0	2.9754e-14	0.532032		0.918422	0.00540441	1.48964e-09	0	9.77902e-08	6.90687e-10	0.789256	0.245831
RPL8	0.000353891	0.151455	0.562691	1.12068e-07	0.766109	0.787368	0.0288929	0.0128211	1.50103e-07	0.000121053	6.51165e-08	0.178925	0.101585	4.33156e-05	0.918422		0.377128	0.769081	0.00220661	0.00038764	1.63054e-06	0.112551	0.262247
NCOA4	0.00256455	0.074097	0.60488	0.887789	0.465134	0.663081	0.0203867	0.0620212	0.69015	0.0293988	0	0.561707	0.176295	0.693954	0.00540441	0.377128		5.07905e-12	0.94495	2.55939e-07	0.0147264	0.112744	4.44089e-16
LPCAT3	0.770668	0.608289	0.000595714	0.000267892	0.00321023	2.14495e-13	0.212723	6.86885e-05	0.339466	8.4618e-05	0.00433715	0.0108894	5.61721e-09	0.0753524	1.48964e-09	0.769081	5.07905e-12		3.78468e-05	0.492854	8.19563e-08	0.000374124	0.00119928
GLS2	0.524608	6.51479e-05	0.172879	0.525955	4.65489e-06	0	0.291315	0.169497	2.21423e-06	4.44089e-16	0.21564	9.06069e-07	0.0799392	3.80387e-06	0	0.00220661	0.94495	3.78468e-05		0.0003507	0	0.00824261	0.00686483
DPP4	0.168741	5.04396e-05	0.100957	0.00611237	4.99771e-05	1.27579e-07	0.00280067	8.14536e-10	0.0615929	1.00074e-06	0.170702	0.000133078	1.29469e-07	0.115234	9.77902e-08	0.00038764	2.55939e-07	0.492854	0.0003507		0.121319	0.27839	1.69997e-12
CS	0.0671297	8.69952e-05	3.60306e-05	9.5821e-05	6.68731e-05	3.72262e-09	0.945334	0.351991	0.000194335	0	0.0181365	1.93994e-09	0.00110971	6.05601e-05	6.90687e-10	1.63054e-06	0.0147264	8.19563e-08	0	0.121319		0.425072	0.352369
ALOX15	0.487321	0.812188	0.00503155	0.455046	0.763038	3.83058e-11	0.725317	0.000165365	0.0565415	0.118569	0.0615145	0.00381405	0.106724	0.000112443	0.789256	0.112551	0.112744	0.000374124	0.00824261	0.27839	0.425072		0.452594
ACSL4	0.630954	0.0398562	0.0294517	0.892598	0.018924	0.00244769	0.00104941	3.96216e-12	0.891081	0.809934	5.50011e-05	0.312745	0.000689055	0.737884	0.245831	0.262247	4.44089e-16	0.00119928	0.00686483	1.69997e-12	0.352369	0.452594

## Sheet: LIHC
ZNF419	CDKN1A	HSPA5	EMC2	SLC7A11	NFE2L2	MT1G	HSPB1	GPX4	FANCD2	CISD1	FDFT1	SLC1A5	SAT1	TFRC	RPL8	NCOA4	LPCAT3	GLS2	DPP4	CS	ALOX15	ACSL4
1.17432	6.40225	9.35063	5.40288	2.90757	5.97119	3.51909	9.82658	9.01706	2.03937	4.23934	5.78052	5.41787	8.28271	4.57954	11.2597	6.76524	2.24888	0.283348	4.35978	4.60466	0.0742319	9.28669
1.21356	6.52902	9.53651	4.39683	3.33981	5.53994	4.74182	9.85334	8.53907	3.15709	4.5838	6.31794	5.02514	7.25209	5.66485	10.2216	7.12572	3.77322	0.592026	6.18691	5.38492	1.06851	6.34832
1.35558	7.50792	9.77984	3.93058	0.0693492	5.57687	7.35774	6.89344	8.41572	1.37597	4.12384	5.14758	2.67723	8.94364	4.46165	8.67434	8.04912	4.64358	4.8759	5.02209	4.36356	0.0563962	6.54974
1.64376	5.0539	9.83878	4.17774	0.404393	4.40778	0.631818	8.37156	7.92988	1.00861	5.11146	3.73243	1.3533	8.02384	4.92693	8.80266	7.54085	4.19929	3.92771	4.19672	4.93043	0.0729825	5.75986
0.7349	6.54481	10.0128	4.34626	0.329236	4.13163	10.6166	8.34082	8.40447	0.851887	4.22711	5.82407	3.00282	8.13113	2.51874	8.56533	7.81566	3.40077	1.12171	4.94607	4.36066	0.672907	2.35035
0.463294	6.95432	9.24094	5.62984	0.674218	4.62723	4.76046	10.2837	7.98924	1.11243	3.97883	4.36568	4.01085	7.41767	5.12389	11.2643	6.44173	2.36277	1.00153	5.85651	5.26507	0.129317	7.94287
0.990499	7.44922	9.22559	4.68761	2.45473	5.4929	9.2097	9.04232	8.5419	1.70473	4.86984	4.73579	4.1806	8.86196	4.5998	9.71861	7.60609	3.10876	3.11237	5.65278	5.30673	0.165146	6.58754
1.86771	5.20878	10.1025	4.99638	2.89744	4.93065	6.19397	9.4066	8.48683	3.0487	5.71686	5.06112	6.5416	8.40192	5.37155	11.3697	6.96	2.72777	0	4.68044	4.56543	0.0872331	5.57421
0.647315	8.57471	8.67571	3.81227	0.0948747	5.27192	10.2383	7.79684	9.05715	1.22051	3.55889	5.92001	2.14628	7.67724	5.67416	9.00443	7.15974	4.01834	5.32427	5.3443	4.03066	0.784281	4.55095
1.73243	7.97731	9.88882	3.84913	0.492477	4.57758	10.0397	8.80565	8.47235	2.68255	4.65978	6.2696	2.8682	7.36478	4.60828	9.23159	6.56518	4.34847	1.61709	5.25539	5.24703	0.309809	4.75286
1.05137	6.33738	8.08288	4.85798	0.58181	4.04081	4.01014	10.8461	9.50103	0.386087	4.61815	4.80795	4.0733	7.9019	2.62889	12.961	5.79854	0.275257	0.276957	3.83883	3.8686	0.0245521	5.90994
2.38747	7.18003	8.20161	5.33496	1.13944	5.53745	5.27225	10.4553	8.12305	2.25271	4.71186	5.46709	5.01368	7.8604	5.37486	10.7095	6.94632	3.66368	2.2408	2.51413	6.42117	0.0476516	4.54726
1.28663	6.3275	8.86158	3.67556	0.20196	3.03079	1.71531	9.95401	9.09374	0.690019	5.19652	3.32975	3.35513	7.55255	3.1888	10.2164	5.79288	1.05208	0.38101	3.24329	4.48428	0.158484	5.88513
0.874487	7.16983	8.12028	4.55886	0.771156	4.75954	5.83387	9.65443	9.05758	1.45714	4.47227	5.62628	3.23515	7.78496	4.67712	10.1001	4.93983	1.53266	4.32534	5.466	3.80131	0.143108	1.9551
1.83463	6.89101	8.80047	4.69407	0.438496	4.97846	4.49689	10.2204	8.22043	1.23488	4.40449	5.63976	3.09021	8.41621	4.36658	10.503	7.66967	4.21925	0.924944	4.50144	5.25131	0.0732111	8.51433
1.52023	6.32766	9.05048	3.92948	0.874954	4.47218	0.292772	9.76753	9.38804	1.38477	3.99128	4.14966	3.73038	8.36582	4.79076	9.61311	6.68111	3.28359	3.77183	2.77621	4.41665	0.114527	7.53337
1.53443	5.36191	9.84864	3.86531	0.0695006	5.14393	1.35494	9.68176	9.17221	1.29362	4.37512	5.335	2.45092	6.92195	5.15267	9.98826	7.38332	5.11776	1.37207	4.14142	4.53214	0.312132	8.93007
1.3212	6.94592	8.69222	3.56944	0.153356	4.2405	1.06963	10.4552	9.00422	1.40141	4.10505	4.40195	3.26929	6.80524	5.51242	8.83313	7.12065	3.72354	3.97183	4.2	5.04961	0.0216678	7.50209
1.26603	6.93296	9.02283	4.31223	0.561638	4.78467	1.63237	7.76642	9.56883	1.57377	4.81946	5.79024	2.11192	9.4121	3.86147	9.4708	7.0416	3.22547	5.13267	5.5355	4.29852	0.162197	6.01494
1.88375	4.35924	9.04368	4.97813	2.79992	5.90534	9.08906	9.74722	9.33138	1.99384	5.57433	5.91246	3.3715	6.92505	5.32554	10.5132	8.45875	4.48443	0.0873702	7.66873	6.60236	0.0885361	5.80451
1.31854	6.3603	8.9002	4.35393	0.909747	5.37963	0.551202	7.35959	8.28027	0.797325	4.93357	5.67724	2.51428	8.52615	4.41428	9.42774	8.0265	3.62926	3.81131	5.25114	5.72036	0.178634	8.24805
1.14442	5.95321	9.36647	4.87285	0.0688733	5.41262	0.274537	9.82531	9.0533	0.626818	4.71559	5.60786	2.04601	8.64978	4.66431	10.6255	7.11719	2.69321	1.63256	5.22681	5.01493	0.225688	7.23637
2.07497	5.17815	9.84111	4.62314	0.887365	4.5073	9.79479	9.08328	7.86707	2.10398	4.85572	4.90611	2.58858	8.63336	5.03335	9.32568	8.40068	3.30182	3.34701	5.79489	4.55453	0.477131	2.48941
0.953151	5.59924	10.7753	4.90601	0.443791	4.43775	8.48993	9.05299	9.05299	2.47725	5.65488	4.60095	2.8627	7.75108	6.27814	11.5037	7.80291	4.07928	2.7746	4.20346	6.59519	0.123693	9.1749
1.64946	6.05025	9.33483	5.33484	0.378719	5.07479	2.84331	11.1178	8.61088	1.6868	4.30774	5.27836	3.03946	8.11204	3.5377	11.4335	7.02582	2.69466	1.35261	5.53506	5.48406	0	7.85825
1.63598	7.56791	9.5698	4.18732	0.178991	4.37597	6.17004	11.2722	9.4896	1.57748	3.64186	5.69643	5.43847	8.33197	4.16616	10.1894	6.43232	3.29925	0.664078	4.68994	4.72479	0.27005	5.22357
2.25712	7.6667	9.39727	5.3684	3.48206	5.4347	2.37173	8.34352	9.1425	1.47278	4.99228	5.23354	1.72708	8.06712	5.9395	10.0171	8.20186	3.53664	0.130316	7.91821	5.61412	0.0542702	1.99644
0.954581	5.58739	8.69745	4.70303	0.713916	4.68602	11.6211	8.23414	7.90153	0.569539	4.50327	4.41668	3.82021	8.43201	3.91918	9.82188	6.83061	2.23157	4.06007	2.55486	4.34434	0.250396	4.21054
0.785826	6.16903	9.51801	4.77474	0.447014	5.06035	7.46273	8.92693	8.79323	0.848191	4.38792	5.72269	3.7323	8.01192	3.57074	10.0239	7.27667	4.66256	2.51012	5.55096	4.69529	0.360536	2.27546
1.88683	6.25567	9.46747	5.8871	1.22434	5.34487	5.30599	8.66067	8.20404	2.67123	6.03537	4.75457	4.17028	8.3995	5.57321	10.7493	7.00149	4.63607	1.56671	4.65625	5.55137	0.358526	6.72175
0.814386	7.43468	10.2901	4.50218	1.83265	5.57592	3.65533	9.00081	7.99854	3.07531	4.78257	6.96356	5.32175	7.77418	7.47181	10.2693	8.48257	6.1364	0.40405	3.84092	5.56769	0.184098	4.50046
1.15551	7.39148	8.78815	4.69579	0.384312	5.1743	0.705633	11.028	9.05232	2.29367	5.34599	4.37062	3.07846	7.67499	6.80317	10.3736	7.32788	2.83852	0.580262	1.0279	7.57783	0.0438879	3.63315
1.00629	5.1527	8.4623	4.45017	0.283164	5.17141	4.272	8.56939	9.42478	0.66876	4.30429	3.91719	5.15254	8.75629	5.8068	8.95576	6.77835	5.57227	1.42732	3.30513	4.85104	0.432539	6.34516
0.516478	6.395	8.30232	5.19458	0.0825197	5.31313	8.09039	10.5408	8.80289	0.560105	4.57527	4.39475	3.54674	8.32242	3.15098	11.1375	6.9952	3.38659	1.48139	4.68198	4.33811	0.083477	5.70056
1.02526	7.0118	8.12198	4.57545	0.402609	5.77618	8.8579	8.92913	8.30095	1.67345	5.00536	7.5128	2.8168	7.55477	4.16872	10.1616	7.08855	3.16824	5.53214	4.99578	4.80667	0.53174	2.78454
1.19794	7.06966	8.49853	4.6522	2.79186	5.50885	2.92477	8.6194	9.216	1.19751	4.45426	5.56955	4.57001	7.84107	6.07028	10.3092	7.54262	3.42219	0.284597	4.73986	5.37233	0.138894	10.3421
1.44425	9.14313	9.80562	6.46182	4.70154	6.39022	6.14188	10.0824	7.76775	3.23847	6.01499	6.85834	5.35548	7.82123	6.29129	10.8271	7.94477	4.40442	0.770664	7.08594	5.68186	0.186553	6.0634
0.699182	6.85513	8.23713	4.18184	0.171812	5.74172	11.6628	7.86596	8.32373	0.632775	4.33627	5.10466	3.11902	8.22877	3.75784	9.30078	7.97865	4.11309	1.08614	5.38695	4.50522	0.108878	2.98708
1.05134	9.16319	9.13494	4.57431	0.346435	5.62261	6.79095	9.83759	8.79943	3.45639	4.17437	6.51768	2.87585	7.81441	3.84145	9.83393	6.77974	5.07582	5.3024	5.45798	4.64364	1.78326	2.50279
0.960697	9.1216	9.38541	4.38941	2.6104	6.24703	4.6191	7.67556	9.42659	2.00366	4.99119	8.14408	5.42671	5.37371	5.18143	9.08292	7.71983	6.10291	4.70671	7.13863	5.08902	0.72183	6.41839
0.590828	8.43968	8.36144	3.65514	0.116421	5.36779	11.8283	8.06495	8.19592	0.642619	4.16267	4.63192	4.21257	9.19299	3.91949	9.56522	6.55248	2.87387	1.83361	4.15754	4.02412	0.0339519	4.71751
1.5367	6.69848	9.06165	5.00167	4.50151	5.80934	3.58411	9.48363	8.7286	1.93198	5.43408	4.85664	7.21491	7.53821	5.5467	10.7807	7.06645	4.60108	0.13977	6.3639	6.29868	0.025283	4.99386
1.71441	7.69202	8.45557	4.22374	0.335258	4.95921	4.28992	8.53895	7.73747	3.57404	4.43002	5.07782	4.83599	8.10187	4.54534	9.96577	7.10878	4.36146	1.76351	3.05683	4.64154	0.0893619	8.00081
1.93637	6.58866	9.69569	4.40048	0.510851	5.49799	5.47155	8.29404	9.89211	3.13681	5.55154	5.14474	4.02381	8.20018	4.2428	9.96925	6.54232	2.19803	1.89588	4.37702	4.36484	0.771708	4.73167
0.948491	6.72353	8.22209	4.54006	0.277148	3.72252	8.12204	10.2754	8.78451	1.30499	5.49173	5.76553	3.53363	7.91455	4.76716	9.21166	7.72688	4.11761	4.46134	5.75639	5.53309	0.0814423	6.29874
2.27723	8.58201	9.64022	4.3607	0.787443	4.72623	2.85287	8.8968	9.33032	3.88934	4.73448	6.0064	2.76262	7.49882	4.55772	8.98703	7.83154	4.43557	1.57183	3.69153	5.72191	0.0390374	8.05711
2.04557	6.40538	9.10016	3.76418	0	5.44045	8.95399	11.2069	8.75785	0.794467	4.0303	7.01001	0.985403	7.99556	3.30977	10.1557	6.43062	1.81208	0.0430988	6.38378	4.08461	0.827568	0.516671
1.72612	4.73337	9.52385	4.73254	0.601563	3.79483	6.45233	11.5411	9.52067	2.05214	5.79598	6.15576	5.55614	7.39252	5.1437	12.8873	6.6211	1.80577	0	4.32569	4.71872	0.0930624	5.87078
1.51184	7.89524	8.26463	3.81923	0.0551865	5.4305	10.9717	9.50021	9.04403	0.415187	4.65658	4.58502	3.29575	9.21463	4.38343	9.75791	7.17314	2.30617	0.108152	6.22303	4.33339	0.0448378	4.08292
1.96111	7.43189	9.97575	4.99353	2.32945	6.01377	3.82529	9.69306	8.14292	3.43034	7.11118	5.70686	3.96531	7.76871	5.91905	9.69067	8.62241	4.87402	0.546463	5.62563	5.62877	0.161992	5.49342
1.5896	8.51291	8.54824	3.63466	0.119429	4.42396	12.8257	8.74036	9.26887	1.78173	4.93131	5.53247	2.17579	8.17636	4.48137	9.58281	6.99704	1.87942	1.05691	6.02178	3.96803	0.3621	1.79529
1.10659	5.4453	9.44184	4.68079	0.597205	5.08653	7.17955	9.64373	8.92603	1.65115	3.77409	5.05805	4.08491	7.83226	4.66522	10.3322	6.61363	3.62202	0.28196	5.19398	4.87443	0.232725	7.57443
0.658932	6.90363	9.17266	4.35351	1.11591	4.83619	6.87339	9.03787	8.21815	0.64583	3.86073	5.35286	3.78277	7.98126	4.53893	9.57797	6.60958	4.17072	1.92988	4.03675	4.83638	0.078047	7.98341
1.44921	8.84186	9.1678	3.81007	0.877594	5.02753	7.65345	9.16601	9.47723	1.81188	4.21089	7.87297	4.11584	6.65108	4.79764	9.76863	7.00993	4.36772	3.23678	5.60854	4.71738	0.582964	7.40625
2.36537	6.19952	10.0969	5.12419	0.104907	6.31926	2.26622	10.0163	8.62281	2.55001	4.52516	5.34363	5.93244	6.34841	5.80956	13.2448	8.33672	4.18847	0.365818	5.51808	5.51918	0.106115	8.40371
1.54704	3.52495	9.53896	4.86884	0.948599	5.86966	11.3507	9.15115	9.16228	3.39372	5.10725	6.77455	3.40439	7.54972	5.00765	10.6463	8.16345	4.21367	0.197967	6.62102	6.86327	0.176486	7.66273
0.999292	5.77998	8.90505	5.12165	2.4558	5.38184	3.15948	9.02719	8.27566	2.55564	4.70121	6.57921	6.04765	6.77065	5.9168	12.0396	8.18344	5.37867	2.21047	6.03727	5.40592	1.27425	10.2491
1.2073	3.92857	8.66092	3.45694	0.065034	3.11635	9.40172	10.2532	8.46298	0.339609	3.87539	5.21152	3.14972	8.67856	2.34826	11.062	6.04296	0.296995	0.0219662	1.78574	2.82846	0.0528723	6.8429
2.29591	7.88655	9.72344	4.76899	3.03981	6.32646	2.07817	10.3311	8.81689	3.75417	4.0302	6.53976	6.98653	8.86416	6.33389	11.0476	7.50811	3.50078	1.19803	3.88595	7.7185	0	4.78595
2.37353	8.74824	10.0277	5.00419	0.721694	5.76032	3.80583	8.91855	8.84837	2.3946	4.51814	6.4759	5.98151	7.71546	6.30896	10.563	8.16881	5.36283	1.02285	4.84975	5.66623	1.29849	8.82772
1.865	7.64596	8.72491	4.22958	2.22744	4.886	5.29624	9.70424	9.58676	1.65274	5.02513	6.11614	5.41624	8.6381	6.06824	11.146	6.86305	4.35687	1.1606	5.30166	5.50429	0.0244325	8.11357
2.18763	7.60835	10.8714	5.05272	1.96289	5.49537	3.27299	9.87331	8.79364	3.51636	4.96161	6.807	5.42805	7.61955	6.20441	10.4902	8.12369	4.97818	0.0589008	4.96567	6.43102	0.266369	6.71971
1.50574	7.7499	10.0786	5.08362	0.949027	4.59871	9.94711	11.0505	8.77509	3.79521	5.68923	7.55119	4.44273	7.27824	6.29195	10.5283	9.13071	5.58321	1.23047	5.39805	5.97853	0.44313	8.58022
1.78449	5.69331	10.1935	3.64218	0.114993	3.18193	10.8656	8.58465	9.15418	1.2826	5.35618	5.76175	4.73521	7.5363	3.3779	12.1782	5.78694	0.333071	0	3.12287	4.64337	0.0877218	6.6359
2.32765	6.66986	9.07255	5.90886	3.71082	6.23976	4.18419	10.5284	8.94698	3.69097	5.56298	5.16246	6.61457	9.27001	6.34437	11.6129	6.24153	3.74982	0.221797	3.44821	5.97837	0.0788245	5.13151
2.11749	6.29618	9.57088	4.70337	0.681504	5.03016	5.45763	10.1304	8.81191	3.99569	5.75319	5.22965	8.46152	9.3435	5.33947	11.5391	6.98576	2.9712	0.0999728	6.18563	6.05561	0.232141	6.71924
2.51495	4.78544	9.70106	6.06015	0.734498	5.58983	7.22423	9.04252	7.99868	2.66663	5.64106	5.54811	4.22377	8.49186	5.79815	11.5804	7.38848	3.6406	0.226923	2.17301	5.76987	0.0452743	4.59293
0.558099	6.94801	9.35624	5.40878	2.32445	5.2623	5.99331	10.3578	9.21587	2.71217	4.92486	6.92938	5.48437	7.65615	4.06941	10.8112	7.30679	5.1069	0.562669	5.53317	5.40855	0.0177028	7.74634
1.26466	8.37989	9.33045	4.89173	1.9912	4.85711	4.5609	8.87595	7.79929	1.69267	4.823	4.85758	5.04352	7.20552	5.92097	10.2775	6.83522	3.86453	2.31305	5.30804	5.14893	0.0216746	6.76714
1.43144	5.34265	9.54154	3.85086	1.31164	5.00906	6.79565	9.24276	8.26328	2.38723	5.31946	7.14418	4.2442	7.89531	4.60408	10.817	7.64332	4.87562	0.610099	3.71231	5.2914	0	7.3754
1.61034	6.47491	9.55203	5.35889	2.50836	5.72498	4.20064	11.2054	7.72382	3.33929	5.00607	7.59596	7.99956	7.57344	5.43396	11.0367	6.72422	4.79281	0.165694	7.10181	6.21358	0.0524353	3.75713
1.85866	5.67787	9.33491	5.74726	2.24584	5.71483	6.80398	10.5787	8.61185	2.6525	4.8692	7.50134	5.30614	6.62205	5.53391	11.6088	8.02356	3.94975	0.267555	6.12669	4.84898	0.546319	8.24332
1.1207	5.50861	9.19482	4.88895	1.13217	5.419	3.92862	9.23087	8.34997	2.67286	4.24799	5.24941	5.28115	8.13394	5.40661	12.4	6.62551	4.51045	0.162911	3.40264	5.37865	0.0682932	9.0912
0.679505	6.67266	7.66461	4.83137	0.12044	4.43111	0.305352	8.91242	8.56359	1.07577	4.08843	5.20309	3.31137	7.48462	3.41048	10.1806	6.26759	2.19616	3.21117	4.46637	3.49653	0.256721	0.819472
0.858447	6.84161	9.11573	4.63142	0.496863	3.50354	2.65244	10.9779	10.1677	2.38215	5.09412	5.02148	7.28752	7.67919	4.54855	11.898	6.31755	2.04219	0.130376	3.75599	4.8763	0.0609411	7.12969
1.7663	5.55221	8.85721	5.73888	1.77652	5.99024	2.52158	10.0147	8.84818	1.11225	4.71377	5.87508	1.53408	8.63923	2.33022	10.3196	8.18792	3.17825	0.0792992	7.46605	5.34927	0	2.55052
1.90481	3.41121	9.72761	5.80044	0.200679	3.6524	11.428	9.77146	8.52096	3.42938	5.021	5.79607	7.09728	7.18157	5.71948	14.1453	6.06146	2.95617	0.21466	1.99027	6.41369	0.0232749	2.798
0.760682	7.5031	9.56036	4.63335	5.22419	6.28499	5.14477	11.4551	7.60109	3.62442	5.02996	5.89344	9.3899	9.50989	7.96207	11.1573	7.09129	3.46898	0.198549	2.29014	6.73902	0.839755	5.03022
1.63403	4.90851	9.68374	5.47886	3.94941	6.44415	7.11243	8.61728	8.66334	2.42422	5.13151	7.11604	4.99646	6.67444	3.83089	11.0427	8.25722	3.07586	0.122998	8.66509	5.84332	0.0866007	3.21552
0.888921	5.33925	9.2065	4.42982	0.469973	5.02563	0.695122	9.24826	9.54238	1.20438	4.52122	5.57873	0.934358	7.24942	3.90609	10.2441	7.08827	3.11505	1.39031	5.64947	4.19234	0.0150571	5.97448
2.75675	7.00325	9.69262	4.91976	0.191024	5.20746	2.16213	9.80147	8.5734	2.97319	4.45708	5.3565	4.44672	7.14221	5.29129	10.4924	7.36819	3.4778	1.29506	3.68879	6.14575	0.577544	6.2053
2.24533	5.41814	9.39436	4.62984	2.71567	4.75749	5.17031	10.0528	8.73877	3.04325	4.88758	5.27775	5.69616	7.63055	5.19698	10.9221	5.96918	3.09425	0.259818	5.49785	5.59326	0.0676528	6.8964
1.26747	6.64673	8.05927	4.1603	0.141819	4.62053	8.53606	11.0864	10.1706	2.82215	6.09248	5.17185	4.8926	7.42395	4.43809	10.5451	7.51071	4.20437	2.51261	5.69228	6.56103	0.219874	3.46041
2.35845	5.09079	8.83761	4.34249	0.893867	4.61379	3.35154	10.4728	8.62238	2.79235	4.67222	4.668	6.1322	7.01677	4.37567	10.9854	6.68881	3.00869	0.221045	2.81006	4.88583	0.193931	8.95062
2.72092	6.6528	8.91124	5.41549	0.837328	5.555	3.52201	9.34827	9.23952	1.37017	4.84183	3.99321	2.20054	8.2898	3.9162	11.2094	7.5256	4.11632	2.91388	7.24854	5.0318	0.574663	3.99434
2.62978	2.26162	10.0872	4.22717	2.05784	5.11849	6.18736	10.3072	9.37796	2.39998	5.23138	5.21396	5.98977	4.89969	6.40734	11.3113	8.22794	4.34644	0.129044	5.02162	5.4738	0.328965	7.81409
1.70926	7.47345	8.4556	4.80302	0.253927	5.16542	0.890182	10.6558	8.9329	1.02245	6.21578	5.21908	3.99502	8.91394	4.53628	9.75438	7.46834	2.64209	0.0221286	6.00968	6.65975	0.104622	4.17644
1.30844	8.00919	9.18807	4.68757	1.94215	4.58597	1.53972	11.105	9.81498	2.08357	5.24485	7.2043	2.41969	6.81695	3.61132	11.051	8.37716	4.95435	1.30008	5.70984	6.36958	0.171303	8.89372
0.645965	8.96978	9.0814	5.03995	1.28972	5.30268	2.37386	9.64284	8.3358	1.87388	5.11333	5.01764	4.28645	7.34299	5.85087	9.92183	7.43082	3.43476	3.65658	2.75165	5.27155	0.0508987	6.11887
2.14531	8.58614	9.69168	4.44735	1.74992	5.78195	5.6406	9.8829	9.57137	3.27247	4.74511	6.72991	7.56179	8.1417	5.85015	10.0465	7.2516	4.6298	1.15081	6.2666	6.23076	0.171655	6.66248
1.14678	7.55798	8.97005	3.551	1.1937	4.96833	8.30177	8.63444	8.69958	2.10216	4.49042	5.3891	2.30551	8.41522	4.94662	9.34484	7.23608	4.09367	5.76264	3.85892	3.99472	0.322968	2.96729
0.983215	6.56243	7.45561	4.96701	3.93788	4.75895	7.68925	10.3528	9.05496	1.09028	5.44625	5.64701	2.05892	9.53847	3.81366	11.0265	7.2541	2.41975	0.0771275	7.5023	4.88483	0.231056	3.16949
1.23547	6.33993	10.2711	4.87876	0.916629	4.49445	0.615504	9.19162	8.12707	1.14566	4.78077	4.16903	2.63585	8.2572	5.34896	9.92546	7.29129	4.8995	0.488519	2.63066	6.42659	0.0454057	4.45895
0.770283	5.8468	8.76457	5.49269	0.419888	4.57865	2.44742	10.0011	8.99501	0.647211	5.03639	5.3497	3.10022	8.6897	4.24512	11.4876	6.43297	0.403782	0.320774	4.18463	3.88057	0.0173753	6.87264
1.19433	7.10902	8.91466	4.68534	1.05276	5.99182	5.26767	10.3305	8.67134	1.76427	5.45244	7.66447	3.05291	6.89133	5.50114	9.66304	7.76772	4.68325	5.61228	5.25464	5.24746	1.33084	3.7364
1.48182	6.40636	8.52979	4.29227	0.0480045	5.47192	2.22259	7.26632	8.17077	1.19594	5.351	4.87066	1.34427	7.60632	4.87083	9.00367	8.14987	4.49808	4.11936	6.83894	4.73391	0.630226	7.00294
1.24528	7.41363	9.09646	4.57446	0.198519	5.62832	0.942198	9.29239	8.91927	2.86563	4.29259	4.15774	2.94222	8.31436	6.01276	9.58851	7.56622	4.89749	5.10341	5.7808	4.56727	0.76944	4.6756
1.3717	6.99452	9.62297	4.17299	0.292305	5.07274	6.54575	9.19459	8.77511	0.684421	4.04387	6.23084	2.42795	8.50485	5.44335	9.19033	7.83345	4.60771	4.01731	6.03866	4.38678	0.352403	6.92264
1.16718	6.55805	9.31753	4.39199	2.70259	5.82659	4.31512	8.31916	8.47637	1.72204	4.35451	6.54532	2.66193	8.1093	3.69911	8.89627	8.40778	3.93929	0.10535	6.73508	5.38062	0	6.04161
1.49277	6.95034	9.72328	4.14063	0.0364939	4.60433	4.27675	8.37063	8.64505	0.741946	4.47064	5.88765	2.12163	7.79964	4.30539	8.45155	8.1759	3.64077	2.19914	6.2067	4.88259	0.858365	5.76022
0.678536	6.40127	9.38808	4.80977	2.31867	5.61749	6.68284	8.17285	8.31716	1.83809	5.09414	5.52108	4.63936	10.3403	5.5064	10.1963	7.51419	4.27065	0.70212	2.92143	5.63379	0.433019	7.42462
0.605333	7.18089	8.57752	3.86902	1.38127	5.82226	10.915	6.81396	8.00562	0.363605	4.15469	4.80197	2.58779	8.6946	3.00729	9.00281	7.24918	3.69809	0.65168	5.03354	4.20564	0.0910172	4.99018
1.79124	8.12111	9.32245	5.70333	0.906954	6.58654	3.87851	8.80539	8.44107	1.76126	5.0044	5.56328	3.84458	7.79922	5.6336	10.6336	7.69918	4.35601	0.0761586	5.73794	5.83667	0	1.72354
2.13756	5.78653	9.04697	5.57848	0.833551	5.25148	2.14868	8.61753	9.23623	2.03044	4.25269	5.56468	3.40324	7.24705	4.93167	11.2943	7.73644	4.73657	0.657698	6.1063	7.42989	0.249949	8.31121
1.17832	6.61449	9.27704	5.38703	1.85673	5.10241	4.52259	10.2407	9.24725	1.57903	4.52752	5.87474	5.80133	6.96366	5.415	11.143	6.37407	3.51965	0.0834889	5.6221	4.30222	0.0846045	7.229
1.78817	7.64503	10.0232	4.70127	0.454615	5.88304	0.322752	9.82633	8.53688	1.8153	3.67035	6.1933	4.21669	7.40227	5.78605	10.1953	8.59022	5.13115	1.71447	5.77447	5.89785	0.133128	8.61737
1.57678	5.50114	9.37861	5.50336	1.84539	5.23677	6.57192	9.90467	8.22896	2.7304	4.93594	6.55975	5.47074	8.1792	4.47403	11.2347	7.81572	4.78491	1.23626	5.24945	5.10838	0.0861663	7.77714
1.06881	6.22997	10.1742	4.68727	2.97756	5.51344	3.97697	9.73048	9.81602	3.36352	4.76703	6.75615	4.38578	7.93599	5.04247	10.7201	8.67931	5.30921	0.0614295	4.88595	5.87327	0.103107	8.08084
0.732325	6.77036	8.80852	3.75358	1.23771	4.9526	3.59392	8.40914	9.04597	0.792368	4.55082	4.83385	3.23757	5.66003	4.43742	9.18257	6.99323	4.31814	1.62601	5.38348	4.42726	0.47823	4.47552
1.49094	7.46342	9.9711	5.28286	3.99371	5.86058	3.01296	9.00578	8.76624	2.5221	5.33101	6.74346	5.38292	8.44707	5.41293	11.0378	7.65251	3.57349	0.0816424	7.8352	6.24654	0.600299	7.60399
0.922734	6.24748	9.42392	4.95491	2.24022	4.76173	3.41207	11.761	10.7473	0.633586	4.93223	4.18128	3.04309	8.249	2.1346	12.2911	6.73017	0.536321	0.0417453	5.75347	4.38224	0	4.62359
1.56998	5.73816	9.14114	3.97042	5.46471	6.14956	6.09207	9.58417	8.55822	1.14063	4.57762	7.6929	1.91978	7.43154	3.37771	9.70304	8.8735	3.33945	0.322315	7.28629	6.06914	0.111219	4.98617
2.33767	7.58038	8.77105	5.127	1.07379	4.66184	6.74767	10.5922	8.64132	0.718932	5.19079	5.03749	5.1068	7.21679	4.52322	12.7121	6.33099	1.13634	0.597133	3.08546	4.24639	0.118503	1.70413
1.37748	6.16611	9.48242	5.68715	3.46671	4.30489	4.13531	11.682	9.92054	2.25771	5.56457	7.24269	6.22046	6.56742	6.56663	12.6817	6.04233	1.98532	0.0421146	3.74937	4.51447	0.132372	1.64269
1.33602	5.73052	9.93332	4.45338	0.0876836	4.23969	2.78296	10.3493	9.84858	1.02261	5.63448	4.99516	2.10475	8.08453	4.02231	12.15	6.8217	1.70099	0.214803	3.45343	4.13333	0	7.35647
0.570172	7.22441	9.14571	4.63373	3.90164	5.09396	6.40251	10.5099	9.52863	0.988776	5.30422	7.02949	4.55591	7.31146	5.31631	10.6334	7.05433	1.69432	2.28673	3.73702	4.19943	0.13096	7.15695
0.595997	5.85805	8.00715	3.73882	0.0368216	3.59393	1.64946	6.61703	8.46091	0.445071	4.55252	5.2436	1.15663	7.95526	2.83543	9.1084	7.30433	2.53468	3.2965	5.15275	4.13221	0.0735733	1.71948
0.84872	4.59389	9.52748	5.69414	0.655172	3.29675	4.57898	10.0727	9.39825	0.907522	4.43953	5.12968	1.49091	7.8924	2.31709	12.5785	6.30508	2.04172	0.0188129	3.16075	4.15394	0	7.2196
0.837253	4.99378	9.51711	4.13689	1.53097	4.98449	10.3244	4.63198	8.55625	0.535963	4.51984	4.57709	0.959989	9.90749	5.11998	9.09522	7.85062	3.54285	5.54688	2.6143	4.10259	0.0217197	8.82845
1.45664	8.37993	8.59995	4.18115	0.37655	4.77617	1.63846	10.1274	9.12495	1.88387	5.15137	6.23023	1.9464	7.90856	4.51852	9.65321	7.2118	2.89446	3.55055	5.06602	3.90619	0.585075	4.12922
1.14619	7.98294	6.15813	2.77776	0.626914	2.77676	2.50236	11.6995	9.9165	0.306071	4.6137	4.19906	3.33928	8.45767	3.32401	10.0016	5.37401	0.336999	0.0473421	2.85638	5.39718	0.0760246	2.60285
0.974079	5.52864	7.7665	3.6822	2.21696	3.38459	3.83301	11.3622	10.459	0.761392	4.57687	3.19425	4.98472	6.85353	4.38686	12.1086	5.2431	0.0753119	0.514021	2.61013	4.71932	0.0526838	6.57823
0.92616	5.79083	8.63657	5.02994	2.00003	5.16618	3.28453	8.76988	9.13778	0.665018	4.28438	5.36786	1.9909	8.20691	3.27075	10.1608	7.48724	2.80451	0.051397	7.40552	4.92127	0.0824669	0.982205
1.39165	7.4631	9.19727	3.61406	0.21925	4.72805	3.7155	9.74391	9.73031	0.850426	3.96385	5.15925	4.56388	8.09788	3.90272	10.5967	6.81582	2.58245	0	1.13515	5.06867	4.67887	7.33204
2.33243	6.59185	9.37954	4.80756	1.85703	5.90219	1.85283	8.87261	9.33591	2.0143	5.47187	5.07363	4.53845	8.82295	7.2025	9.14415	7.73864	4.54477	0.152268	1.3651	7.30871	0.936636	7.73831
1.11546	6.99263	8.92483	4.70442	1.97773	4.97689	6.4406	8.22691	8.44226	1.00577	5.01493	5.11967	3.56694	9.53165	4.29262	9.34556	7.39345	3.98299	4.68596	2.2387	5.21283	0.107727	3.14155
1.36945	7.74918	8.97061	4.15509	0.703432	4.97055	7.22639	9.36891	8.36974	2.03842	4.94103	5.62561	3.65582	8.23919	5.6856	9.70372	7.85646	5.90468	3.94663	5.59563	5.82808	0.220153	8.51778
0.738205	8.93341	8.85243	4.7786	0.349924	5.8994	1.95163	8.2358	8.05671	1.89745	5.21115	5.94971	3.65011	7.88896	5.97638	9.40285	7.71254	3.93323	0.930341	5.60687	5.20927	0.155002	5.49503
1.61884	7.00713	8.22554	5.35471	5.99525	6.61613	3.8591	7.02664	8.36926	0.466713	5.01373	5.85068	1.95054	9.10734	4.54112	9.02903	7.52521	3.40678	0.0366918	7.13732	5.55621	0.0224289	2.64103
0.556896	5.10473	8.03464	4.8122	1.32428	4.24982	2.96222	9.28418	8.46532	0.710159	4.41074	4.25892	2.78302	8.71009	5.0651	9.91521	7.43119	4.08409	0.0400875	4.98043	4.56326	0.0486221	6.85184
2.17017	8.57731	10.1838	4.68989	1.56532	5.70133	2.04308	9.42179	8.69217	2.46423	5.33876	5.25164	5.81146	8.82726	5.98893	9.5323	7.60965	3.25448	0.412413	5.72234	5.90978	0.0239978	7.91852
0.660546	6.16085	8.35312	4.20051	0.0466617	5.08174	3.68219	7.54367	8.1675	0.644729	4.2996	3.81385	2.15957	8.04592	4.1137	8.73146	7.26211	2.91001	3.16666	6.86604	4.6557	0.168883	5.17838
1.43041	8.40506	9.07261	5.25742	0.245129	4.63549	3.04685	9.29823	8.29833	2.95778	4.74867	5.14313	3.91639	7.43709	6.2888	10.2047	7.26027	3.74006	3.5508	4.31729	5.07767	0.505686	6.12352
1.56539	7.67989	9.01422	4.32558	0.0773088	4.88674	9.29818	9.77462	8.45767	0.651093	4.04502	5.22945	1.89098	8.14707	5.01059	9.24419	6.99113	3.29126	4.79019	4.82394	5.10951	0.447782	1.17624
0.735714	7.53717	8.71241	3.60828	0.0254777	5.12456	11.7326	7.93779	7.70295	0.544071	3.82704	6.23508	2.10457	8.1629	3.04914	8.61954	6.94946	4.06275	2.69548	4.76668	4.23785	0.0240749	7.29085
2.52518	7.10297	9.82844	4.54431	0.0534085	4.9232	0.429136	10.0283	9.37889	2.30046	4.11091	6.31317	3.17997	6.69802	3.83419	10.8895	7.5444	3.97305	0.202367	5.7096	5.76985	0.417751	7.30956
1.47029	6.64931	9.60392	5.19979	0.338974	5.52004	3.79281	8.96247	9.09307	0.809779	4.83562	5.50228	4.26748	8.81378	4.44594	9.93239	7.10745	3.29835	2.57843	6.08583	4.58917	0.675635	8.94608
0.8156	5.03253	8.56528	4.01224	3.1923	5.37317	7.40338	7.55878	8.22269	0.264938	4.64013	5.26453	1.45447	8.45012	2.30193	9.05752	7.09087	2.57455	0.0437372	5.5628	4.0694	0.026761	1.66482
1.84123	7.38323	9.78578	4.84082	3.31137	4.93647	8.02918	8.95587	7.54189	2.41166	5.94603	6.51067	4.91102	8.37864	6.18828	10.0752	7.34217	4.89714	0.633606	5.54023	5.86128	0.0829626	7.19285
1.55057	7.66715	9.17956	4.11879	2.47266	4.67996	5.11455	9.5481	9.03664	2.5149	4.70869	5.65656	5.36821	8.79923	5.84048	10.3331	6.88071	4.92252	1.87163	5.11396	5.58888	0.210453	8.5172
1.61048	7.10784	8.59509	4.84619	1.28821	6.00287	7.62359	9.59214	8.57511	1.22093	4.24171	5.51723	4.5282	8.4908	4.7329	10.0038	7.58383	3.79044	1.99219	5.79256	5.44549	0.394344	4.50306
1.12954	7.10152	10.4505	4.34965	0.326762	5.04657	8.45038	8.46329	9.24773	1.32095	4.61851	5.43926	2.56083	7.96158	5.4934	9.34793	7.63759	3.7297	3.91901	4.29275	4.73029	0.230029	7.33432
1.19322	6.41613	8.82367	4.08449	1.34728	4.65752	6.40167	8.26495	8.1688	0.811685	4.04982	5.02651	3.00445	7.86799	4.90395	9.96243	7.20689	3.13523	3.91426	3.91831	3.94785	0.114035	8.15259
1.22595	8.78388	9.24274	4.00183	0.0442276	4.11566	1.69175	9.37074	9.13721	1.93975	5.79011	5.22133	1.33288	7.93343	3.66286	9.01186	7.68071	4.47703	4.88143	5.77146	4.69624	0.187276	1.82683
0.90432	6.13756	9.94618	4.85161	0.0663595	4.82841	1.04218	6.59157	9.20066	1.07321	5.1707	6.03909	1.93632	8.70333	2.2144	9.34631	8.48051	4.83796	4.21164	2.54261	5.26931	0.502626	2.36924
1.42192	3.8554	8.00227	4.75099	0.0277681	5.93396	4.38757	7.47829	8.72512	0.550147	4.36916	4.54082	1.33277	7.95724	4.57344	9.92843	6.79484	2.75957	0.0481638	7.51846	4.20095	0	4.57542
1.62146	7.97741	9.42202	4.68055	1.75397	6.34939	8.24688	9.7564	8.28272	1.48902	4.57215	6.08637	1.93195	7.89471	5.97481	10.0734	7.6756	3.25232	0.290576	7.88346	5.76467	0.029813	3.29562
0.661322	8.0722	9.3492	3.82931	2.10074	4.91414	10.2067	9.39288	8.48627	1.92691	4.76817	6.03695	4.74248	7.41618	5.07767	8.97625	7.96464	3.24959	4.82544	5.91774	4.53283	0.155756	7.04524
1.40668	6.39873	8.96536	3.19737	0.308273	1.85577	1.2857	10.3134	10.3276	1.0293	5.27855	4.57814	4.99314	7.98817	5.03963	11.8397	5.70254	0.913221	0.446106	2.1733	5.08297	0.0392097	5.12464
2.54729	8.50804	10.5469	5.10304	2.30799	6.27719	6.43149	11.1377	9.73203	3.35646	4.6008	5.22645	6.62288	7.32161	5.21459	11.357	6.62263	2.48658	0.499465	1.25406	6.72301	0.138358	3.65876
1.68884	7.18398	9.87102	5.68689	4.23776	5.58162	0.408748	10.1642	9.66553	1.02401	4.3298	7.79679	3.70845	8.23648	3.91662	11.4509	8.07473	2.31533	0.0628002	6.18386	5.6277	0.0257961	5.51344
0.469162	5.98319	8.99282	4.07838	0.939642	4.2566	15.484	8.88008	8.44914	0.458148	4.3841	6.767	3.02033	8.47585	3.7231	9.52518	6.3031	2.71225	2.86224	3.84457	4.21402	0.0887451	5.05171
1.43121	4.90147	7.97759	5.05929	0.677688	5.87263	6.83796	9.62737	9.00909	1.87405	4.67447	6.86704	1.94496	8.34683	4.22486	11.3164	9.11912	3.8622	0.540172	8.03043	5.89983	0.0585734	2.36817
1.81828	5.16673	8.35367	4.38293	0.870206	5.97965	5.21388	9.79895	8.91879	1.7136	4.63199	6.42362	1.87013	8.84591	4.06768	10.3315	8.89782	4.508	1.77546	6.65271	5.53948	0	6.12932
1.32186	4.12253	8.31302	4.01951	0.941297	5.31805	3.80859	10.7531	9.6612	1.87045	4.90744	6.70259	1.50698	9.03553	2.59698	10.8933	8.41882	3.44464	0.400441	5.91186	5.46619	0.018595	7.16267
1.29335	3.91688	9.44666	5.50782	3.41359	4.2565	4.19111	9.85049	9.40154	1.5854	5.0954	6.04916	5.50467	8.32015	3.70287	12.401	7.66261	2.28303	0.0898472	6.74333	5.82762	0.0371104	6.23888
1.44541	6.0868	9.53882	4.03697	0.145984	4.58733	7.53482	9.07456	8.327	1.72183	4.16336	5.69288	4.13011	8.52196	3.55075	9.52548	6.99356	3.12823	0.789569	4.21486	4.08768	0.154641	8.04377
0.99989	5.97808	9.21212	4.81119	0.724092	3.73379	10.0546	10.4507	8.6312	0.579065	4.49055	4.68943	2.96455	9.18912	2.43879	11.9659	6.05959	0.227239	0.0186011	3.34508	3.74299	0.0883389	3.99495
0.823667	7.07487	8.03782	3.58487	0.562196	4.03497	4.94219	7.2937	8.65355	0.709774	4.05108	5.52169	2.04571	6.47863	5.39831	8.97478	6.91802	2.65046	0.112647	5.73334	3.03655	0	4.71138
1.34822	6.54767	10.3149	4.89804	0.045382	4.4071	0.752691	8.9485	8.5401	2.05154	4.81416	4.96155	2.5912	9.1163	5.47537	10.0287	6.65705	2.88822	0.616756	4.14953	4.10101	0.104947	1.11712
2.07699	3.51054	8.96748	4.47662	0.107905	3.3383	10.3917	9.48868	8.67347	2.5848	5.18564	5.2712	4.50302	8.1376	4.71798	11.2986	6.33992	0.720126	0	5.15406	4.68135	0.17423	5.61615
1.31418	8.24679	9.78786	5.52458	3.97007	5.95799	5.76963	9.98934	8.45996	2.92321	4.39431	6.04945	5.75869	7.53404	5.90872	10.3959	6.76345	3.50504	1.43465	6.28839	5.43188	0.179192	6.67064
1.41811	6.42675	9.28653	4.96334	1.18071	3.48568	6.67258	10.8705	9.18858	0.82381	4.83508	6.10117	4.79777	8.76856	3.29458	11.3994	5.2866	0.750793	0.0665537	3.09963	4.36175	0.156873	6.52861
0.16627	4.33569	8.51979	5.17367	0.0958631	4.45976	1.6534	9.25319	9.19159	0.262578	5.19889	5.59728	1.64217	7.10066	3.59102	11.6439	6.79559	2.16115	0.383835	5.17877	4.71158	0.0133122	5.32591
1.22745	6.44676	9.63896	4.3653	4.2259	5.40075	9.51443	8.51637	8.57783	1.4965	4.89507	8.02483	2.72841	8.59672	5.39058	9.99105	8.49439	4.62228	1.9535	5.11767	5.7428	0.0419372	9.44186
1.33605	3.84978	9.8604	3.69603	0.43769	3.79247	8.70328	10.421	8.2794	2.28061	5.06953	6.42812	5.08899	8.77047	4.51225	11.412	6.8392	3.68541	0.71091	4.20111	5.69499	0.264059	6.81861
2.00078	7.86335	9.47003	5.31373	0.0728268	5.7437	9.03359	9.51576	8.40862	1.33583	4.19607	5.07793	3.79142	7.96514	4.11792	11.6697	7.80097	3.73554	1.08392	5.99535	5.61125	0.2745	7.83988
1.28365	6.75234	7.8068	3.25373	0.0124884	2.52112	4.85554	9.73557	7.721	1.11837	5.08452	5.33151	2.25547	8.09542	4.55505	10.6014	4.89029	0.475526	0.313818	3.55632	3.90831	0.400796	5.56413
1.49584	6.58524	9.73486	4.38613	2.11544	4.96769	6.11183	9.94576	9.06518	3.3628	4.64499	6.6937	6.43926	7.7267	5.02591	11.8161	7.57649	3.44294	0.234881	5.30461	5.56432	0.209678	5.8599
0.857197	8.41648	8.5972	3.6507	0.802599	4.27951	0.154798	8.59207	8.11763	1.17784	2.92334	5.07682	3.80629	7.83082	5.51119	9.97789	6.20019	3.47184	1.26617	4.21555	4.37696	0.0702676	7.4194
1.15269	7.58752	8.83833	4.8943	0.129669	5.26228	1.77348	9.83663	9.02778	2.52155	5.0008	5.0358	4.05768	7.76741	6.63914	9.78455	7.44333	5.3812	2.42193	6.37084	4.87182	1.60964	8.63746
0.604898	7.01168	9.81308	4.83459	0.415066	4.52566	5.42824	8.25712	8.97781	0.632016	4.05076	5.94106	2.42099	7.48387	2.76691	10.034	6.74903	3.6892	0.143948	4.62734	4.63354	0.106462	6.58108
1.1619	6.38341	8.91298	4.75696	0.424915	5.83006	2.70646	10.5869	9.10892	1.60088	4.31526	6.78264	2.97847	7.99056	4.39607	10.4127	7.89538	4.32487	3.33229	8.05435	6.00389	0.274182	8.33679
1.06891	7.61405	7.86134	4.17981	0.216882	5.88402	7.78361	10.5202	9.21382	3.86146	3.73431	7.36386	1.55844	7.35439	4.89095	9.90353	6.13056	4.18737	3.82662	5.37771	4.35133	1.00491	4.10449
1.89476	2.76092	8.979	4.63448	0.0798442	5.41082	6.49109	8.5151	7.92496	1.98905	5.19977	6.93382	2.23735	7.74539	4.79495	10.7571	8.34907	4.93457	1.82687	5.3431	5.10976	0.123764	8.60702
0.990686	4.49849	8.45887	4.30763	0.93318	5.1848	5.84738	7.49957	8.94126	1.76486	4.65874	5.40371	3.5483	8.8091	3.88995	10.18	7.91196	3.35756	0.0693764	6.23624	5.87879	0	1.77601
0.236441	6.2245	10.1433	5.46464	0.379617	4.8189	0.346685	8.99057	8.65339	0.416145	4.06993	5.0043	3.79554	7.59811	4.19174	11.3976	6.43557	2.73299	4.24185	4.28809	4.60064	0.442647	4.03165
0.881459	5.28979	9.60397	5.81052	2.17062	5.28344	3.99671	9.41592	8.48648	2.73446	6.10806	6.08104	5.77673	8.72805	6.19897	11.0682	8.02224	6.63686	0.0932247	5.4335	5.63528	0.351735	9.77103
0.820405	6.6046	9.31268	4.34648	0.0257339	5.84712	1.76197	10.4401	9.25631	1.93795	3.70601	4.56964	1.43393	7.71346	4.82788	10.014	8.58566	3.96773	0.152875	7.36862	6.3151	0.14011	0.690053
1.5526	7.08577	9.58335	5.52942	1.38144	5.85436	2.79846	9.58718	8.21852	1.93804	4.2364	6.74498	4.80508	8.07329	4.78836	11.2002	7.37252	5.15225	0.802459	6.01768	5.51411	0.183678	7.8932
0.580094	6.46634	9.56188	5.21478	0.219558	4.64022	4.33063	9.41315	8.40975	1.51498	4.41994	5.23054	3.42683	8.20103	5.16789	10.9042	6.7916	4.07307	3.46938	4.35208	5.0366	0.199365	7.41377
0.710327	7.08007	8.46101	4.23813	0.158451	5.29011	2.07372	8.54903	9.04932	1.18245	4.13244	4.71647	2.54154	7.49238	4.34492	9.78303	7.30877	3.93555	1.94075	5.77533	4.53132	0.219666	7.80471
0.979159	5.27441	9.15078	6.17222	3.48873	5.28349	5.17983	10.5763	8.54093	2.49001	4.90112	5.20424	6.9777	8.13128	5.704	10.5497	5.82081	2.34116	0.118942	4.87666	5.32759	0.0424621	5.16438
1.00328	6.03103	8.7854	4.19273	1.54435	4.97457	9.38186	8.61005	7.50218	2.9677	3.79569	6.06075	1.25874	7.54097	4.38808	10.9474	7.08906	2.9286	0.0529145	4.92464	4.46963	0	6.68206
1.7271	7.19687	8.59361	3.23465	1.60776	5.69204	2.01766	9.14729	9.31655	2.53958	3.22783	3.56286	4.53816	7.6562	4.02193	9.08844	5.48432	2.26266	1.92403	4.37744	4.15383	0.7589	7.41746
1.9341	7.36959	9.3424	4.32255	0.259743	4.44174	0.59203	8.89988	7.84737	0.659101	1.43198	3.88464	3.71524	7.42076	2.73356	10.6572	6.54359	2.44079	0.545435	2.12171	4.00141	0.0200199	7.96584
1.65308	3.52793	10.1765	4.94909	0.575227	5.58327	6.07652	9.77045	8.34107	2.56642	5.15914	6.28532	5.74382	8.0356	4.97817	11.0732	7.73114	5.97329	0.402926	5.891	6.03819	0.156159	8.29707
2.09699	5.1897	9.80086	5.89376	2.81125	5.3602	8.24699	10.481	9.22192	3.32504	4.90759	6.50439	3.28164	7.70707	5.24765	10.7514	8.08708	4.05839	0.595079	6.38855	4.80651	0.142108	6.62545
1.76564	3.1686	8.92862	4.85415	0.889104	5.15262	7.99414	10.0184	8.97901	2.80769	5.02209	7.15705	1.88606	6.42866	4.26625	11.1413	8.09201	5.19705	0.381526	6.94189	6.43974	0.0292181	7.7013
1.12857	8.62308	9.92163	3.81928	0.183086	4.03728	1.56017	8.57032	9.82295	1.21472	4.55525	5.29032	1.73742	7.8952	3.97637	10.0026	6.07759	1.96557	2.72735	3.39724	3.44937	0.14711	4.621
1.56957	6.62242	8.78242	4.28536	2.68385	5.28313	4.92893	8.61087	9.04406	0.852293	4.43699	5.3978	1.66885	7.86385	3.61651	9.34509	7.55612	2.92506	0.0528536	7.17191	5.34339	0	1.55731
2.01394	6.35346	9.64711	5.20382	0.0774465	4.07438	0.437874	10.4543	9.07106	1.13121	4.22754	4.6962	3.63622	7.40546	3.55337	11.7888	7.23039	1.68224	0.0229802	5.19065	5.0502	0.303799	6.32899
0.658413	5.82433	9.30589	3.89316	0.0901794	3.64426	4.62567	9.84233	8.79874	1.04569	4.85887	5.95434	2.28058	8.43804	4.59952	10.319	6.75535	3.58339	1.44327	4.31915	4.84925	0.0574352	7.01643
1.01158	7.17256	9.27401	4.88184	0.4488	3.98494	1.30107	10.0887	8.38806	1.14833	4.24233	5.72699	4.36961	8.13948	3.94463	10.7797	6.09092	2.73315	0.908515	3.7652	4.42177	0.310191	6.14209
1.02447	7.20717	8.44548	4.87139	1.07315	5.242	9.07623	8.85613	8.94483	2.43429	5.31987	6.73384	4.04446	7.23349	5.41646	9.68139	7.71851	3.92925	3.21159	6.16	4.82246	0.540541	3.81199
0.658539	6.12872	9.33179	5.18512	0.96342	3.90504	3.5492	10.2467	9.52514	0.951474	4.9244	5.34371	2.97715	7.96039	4.46592	10.8441	5.86704	1.17865	1.53693	4.27371	3.96502	0.164746	4.85972
0.572444	2.78522	9.70096	3.47715	2.70112	3.20775	5.5926	10.8519	9.28159	2.15741	4.783	5.2147	5.66527	7.08047	3.85393	13.9726	5.82652	0.442427	0.0860028	1.24555	3.592	0	6.70995
1.57919	5.92977	8.34174	3.60998	0.525515	2.81617	2.26018	10.2753	9.15485	1.41122	5.493	6.94366	4.7323	6.92346	4.67043	12.6266	6.15051	0.336336	0	4.70463	4.69351	0.0850694	7.55865
0.887713	5.40083	9.77459	4.85804	0.196952	5.34816	5.60772	9.10048	9.13081	1.63627	4.69517	5.58783	2.35199	8.15101	5.28598	11.2556	7.30786	4.97941	4.53909	4.95431	4.71197	0.705489	7.47163
1.37539	6.30965	10.6055	5.48093	0.296799	4.6745	11.046	9.60766	8.41928	0.774996	4.20869	4.0331	1.93549	7.86101	3.56287	10.7376	6.68106	2.17234	0.225617	3.1205	4.66772	0	6.60806
1.07682	5.5407	8.33224	5.13776	1.233	4.37402	7.59621	9.44575	8.7382	1.89502	4.66671	5.92758	2.84131	7.61897	4.61972	10.346	6.95506	2.76597	2.77201	5.28123	4.06972	0.111107	5.02629
1.12483	6.96757	6.82152	2.51945	0.0083943	2.65314	11.123	9.63685	9.56338	0.320269	5.15193	4.63054	2.24791	8.81277	2.47138	10.2397	5.3087	0.115542	0.392435	4.58973	3.36968	0	0.452588
0.744212	5.21737	8.29874	4.84422	1.55331	4.81011	10.2901	9.71948	8.53657	0.331245	3.99456	6.68857	1.31111	7.07141	3.50194	10.751	7.44373	1.17219	0.155124	7.72174	3.37832	0.0585639	0.846976
1.70493	6.30449	8.15369	4.51108	0.933544	5.53975	8.94706	9.2143	9.26041	3.13572	4.67088	5.68971	2.76498	7.47764	4.22524	9.79807	7.2726	4.18	4.25867	5.23244	4.50411	0.517805	5.35398
2.01086	8.33912	9.76113	4.3966	0.910389	5.63741	3.15241	9.0823	9.27435	2.75649	3.99549	7.23725	2.93754	7.64345	6.21196	9.84898	7.72073	3.85038	1.13944	5.50581	6.16204	0.100905	7.77766
1.63231	6.73743	11.0455	5.18459	0.212276	6.50116	1.06157	8.37032	9.17131	1.42817	3.20805	6.02002	3.87214	8.42312	7.1515	10.3842	7.8134	5.49962	3.74207	5.50914	4.90419	0.442877	6.23873
1.90068	5.084	9.2038	5.15954	0.212926	4.1701	6.9001	9.7186	9.1973	2.50514	4.05474	4.86791	7.41429	7.18569	5.25282	12.1238	6.61753	2.17376	0.047782	4.57122	5.36107	0.0579221	5.6011
1.57178	6.39236	9.00487	4.52444	0.0678771	4.92637	4.76534	10.3469	8.40049	1.32954	4.2676	6.40304	1.89884	7.33817	3.12528	10.9411	7.8448	4.0586	1.67625	5.46422	4.98024	0.303333	8.07083
0.647172	7.71079	9.53856	4.01852	0.128389	4.94428	10.6855	7.79254	8.67298	1.36761	3.63475	6.11121	2.83645	8.2479	5.02435	9.63776	7.97428	4.82229	4.34524	4.91319	5.52432	0.161786	7.14881
0.612338	6.11204	8.37301	4.45237	0.0280832	4.69381	10.1477	10.6489	10.2757	0.388757	4.71361	5.83268	2.92605	9.0057	3.43503	10.0668	7.26976	0.806519	1.78314	6.59951	3.8145	0.199777	2.18474
1.07014	6.2508	8.42528	3.61483	0.248498	3.31241	2.70603	8.701	8.85416	1.44133	5.27807	4.93833	3.02011	8.78344	3.01669	9.99746	6.32113	0.439666	1.16044	3.05147	3.62736	0.155916	2.71623
1.13401	3.27218	8.36414	3.1969	0.0141692	3.53848	5.40307	10.1202	7.89721	2.14221	4.60823	4.88896	1.73484	5.86295	4.60578	10.1166	6.65573	3.28447	3.72696	3.6436	5.12001	0.0200329	6.33519
0.783709	6.80297	8.75727	4.39705	0.358309	4.63504	14.8453	8.25345	8.44314	0.790984	3.65869	4.47583	3.00236	8.39463	3.64584	9.43398	6.64916	2.74434	3.36969	3.66735	3.66148	0.137308	5.59637
1.16579	7.05503	9.4517	4.87633	3.44015	4.28946	3.53593	11.1453	9.15404	1.21024	5.08838	4.79094	1.19196	8.34148	2.60497	10.7255	7.16297	2.4526	0	7.05585	4.83537	0	5.30463
1.58382	5.41587	7.52534	3.38839	0.0269382	4.10478	5.69428	10.1963	8.87625	1.59872	4.37327	6.05955	1.64512	7.26341	3.82265	9.03897	6.44794	2.32227	1.97864	6.52557	4.85148	0.247212	5.53991
0.748323	4.25528	7.18714	3.3213	0.441136	3.34604	9.23597	9.23924	8.54728	0.285402	3.46922	4.36635	1.84332	7.60004	1.95758	10.1102	5.83599	0.0485484	0.0186581	5.5514	3.6016	0.0226661	0.784605
1.63439	4.26869	7.07366	4.32314	0.558411	4.49029	14.0087	10.2652	8.79149	1.58262	3.6914	5.33183	4.94625	8.94815	4.32284	11.455	6.52355	0.791529	0.693454	4.75892	4.40063	0.0573909	9.07745
1.52341	3.82819	8.44992	4.76195	2.71187	4.02052	6.88279	10.3902	9.91219	1.3699	4.95201	5.49869	1.5682	7.56781	3.9125	10.6105	7.93961	1.88981	1.98882	6.05221	4.70976	0.160639	3.66294
1.72607	7.83105	10.0126	5.75967	1.09713	4.70062	2.15836	10.4134	7.98516	0.878767	4.87403	5.05422	4.58776	7.93996	5.35998	10.8151	7.07028	3.44828	2.50059	5.39701	5.75246	0.523984	4.21264
0.700171	5.04247	8.5154	4.30132	0.0657405	5.42513	2.86698	8.64943	8.61741	0.868068	4.28929	4.49615	2.74456	8.77331	4.22023	10.1442	6.73078	1.88303	3.20989	5.59592	4.50039	0.0697539	4.06343
0.120926	4.42493	8.3295	4.37214	1.43889	4.92009	2.83486	9.71481	9.25858	1.39814	4.56385	5.82999	2.42432	7.34132	4.90493	11.1991	6.91749	4.64478	3.28449	5.9452	4.75935	0.23426	3.2523
1.16283	6.15858	8.38664	4.76184	0.53003	6.08906	6.48485	8.4705	9.11582	1.69215	4.78533	6.90295	3.14851	8.03326	4.1552	10.3546	8.97064	4.53417	0.636779	6.24115	5.12445	0.316666	5.89273
1.06799	6.85611	9.63442	4.5267	3.65763	4.46994	5.22429	7.52447	8.98503	0.764453	4.97743	5.18488	1.91724	8.57185	4.04255	9.93024	6.95453	1.6862	0.0325252	7.20788	5.14298	0.255998	4.41454
1.83288	5.49864	9.5499	4.68916	0.204101	4.46174	1.32942	10.1832	8.72993	2.03701	3.35304	5.75728	3.9088	7.56087	3.21489	10.7966	6.84537	3.50931	0.3494	4.65225	4.97669	0.289528	8.37363
1.25427	6.87171	9.72455	4.88898	0.473652	5.18881	2.6317	9.36021	8.66273	0.837869	3.41595	4.94942	3.73163	9.0814	4.54725	9.74788	6.66783	2.36647	1.95321	3.43133	4.48576	0.287148	7.3322
1.71872	7.04571	9.41466	5.09025	0.216645	5.84949	5.22356	10.3306	8.65023	2.14134	4.49809	5.08488	2.39686	8.09434	5.62546	10.8832	7.68552	4.04739	3.12604	6.49842	5.76606	0.161535	7.68443
1.41154	3.21389	9.25155	5.49225	0.790573	4.4797	2.12157	9.45055	10.0771	1.18069	5.14219	4.50682	4.05092	7.575	5.10739	12.5182	6.75797	2.25441	0.448083	6.01224	3.84388	0.27898	5.11975
1.38967	6.43907	10.6734	5.56253	1.5719	4.90268	9.41644	10.4288	8.36841	1.17698	4.44505	6.07728	6.20041	8.41124	3.47113	10.7101	6.48677	4.14443	0.360057	4.08412	5.16383	0.1956	8.05386
1.25036	6.79688	9.04813	5.55163	0.562193	5.15905	4.25765	9.98546	8.66545	1.77521	4.79527	7.27508	2.72115	7.6432	3.82291	9.43182	7.72203	3.22271	2.42288	5.44252	4.43559	0.45948	7.54171
0.562737	4.1252	8.90006	5.17013	0.212183	5.64881	11.1469	10.2163	8.32243	0.427106	4.51917	5.66237	2.15046	8.33835	4.15839	10.3511	7.83834	3.69471	0.16737	6.02835	5.19296	0.03554	1.70035
1.15304	6.41289	9.23989	5.02139	0.546871	5.81829	2.25458	8.85933	9.34761	0.602702	4.02791	5.63549	1.38244	7.26724	5.10311	10.9599	7.27558	3.24951	0.37048	6.74847	6.04829	0.0421976	1.47494
1.76061	6.4379	9.55822	5.32596	0.651936	4.90649	1.33342	9.42132	8.41523	1.72822	4.61978	5.6889	1.64562	7.98567	4.49573	10.9308	7.84851	5.10667	1.52666	5.91195	5.24599	0.10356	8.49149
0.506106	7.3121	8.6619	4.82359	0.824513	5.85274	4.97905	9.4562	8.94787	1.23509	4.62694	5.16172	4.34705	7.53805	4.9851	10.2202	7.74792	3.77777	1.90782	6.51721	5.01271	0.806853	6.76471
0.865024	5.80523	8.60903	5.0892	0.0732642	6.29118	4.95537	7.93292	8.79946	0.596929	4.39127	5.64856	1.59879	9.27225	4.4139	10.2138	8.36103	3.7214	0.0774516	7.12337	4.90361	0.0569388	1.85611
1.29028	6.48568	8.13368	5.69439	0.373916	5.8002	7.38464	10.2877	8.88332	1.02259	3.98286	5.37557	1.70097	8.20111	4.26492	11.6396	7.0328	2.86755	0.186276	6.09325	5.71675	0.163188	1.40029
1.58322	7.00651	9.00635	5.57078	0.387782	5.34157	5.92327	9.2763	8.79555	0.673242	4.74095	5.52753	1.9803	7.74637	4.42095	10.9233	7.25754	3.29467	0.0509031	4.61643	5.48691	0.149548	5.44389
0.152343	7.11451	9.59904	5.09902	1.37504	4.63666	6.88127	10.2411	8.05002	1.49364	4.74417	5.41112	5.96581	8.78729	5.04332	10.1758	6.89833	5.28318	0.139278	4.26408	5.07842	0.244822	1.38917
1.43674	6.51855	8.42477	3.93098	0.305942	5.22305	7.74089	8.31153	8.06916	0.778499	3.9568	5.71323	3.36326	8.07175	3.76128	9.13403	7.68731	4.14301	4.76968	4.70905	4.6804	0.101318	6.66562
2.63872	7.11973	9.56762	5.29588	1.00639	6.25918	2.56759	9.67466	8.22827	3.2327	4.60053	5.70921	5.33999	8.42286	5.63489	10.8179	8.20174	3.88841	1.18593	5.65561	5.89109	1.48281	8.56275
1.16614	7.87782	8.66555	4.61374	0.141028	5.89187	10.7245	8.91214	8.29174	1.25331	4.69144	5.38083	4.13556	9.14777	4.0056	9.86314	7.78187	3.88129	1.41154	5.31014	5.04707	0.206695	4.49227
1.52016	7.68912	9.12554	5.07723	0.638094	4.74037	1.93364	9.82966	8.70719	1.93365	4.71191	6.28332	4.57889	8.14247	4.80708	11.5743	7.97533	3.85313	0.522088	4.75738	5.95908	0.145466	9.46062
1.05687	7.51312	9.26659	4.75967	0.117855	5.65234	0.224544	9.24349	8.55378	1.8022	3.67851	4.39279	7.92963	6.13952	4.90121	10.7835	7.46777	5.10829	0.166079	4.21238	5.61764	0.176154	7.83062
2.16637	7.71261	10.1123	5.04034	1.87503	4.86544	3.9274	10.5455	8.50109	1.96472	4.74065	7.08536	5.36125	7.47428	5.88663	10.3101	6.91081	4.9203	0.323697	3.17381	6.71007	0.0758731	6.38771
2.10561	5.02004	8.81962	4.15609	0.0216407	4.87727	0.82979	10.4663	8.59109	1.15485	3.83188	4.30556	1.74007	8.33784	3.91576	10.5423	7.61782	1.88126	1.50103	5.40883	4.05679	0.0305638	6.42828
2.74724	5.26887	8.82868	4.57391	0.40211	3.8821	5.39254	9.19685	9.69603	1.2756	5.94745	5.73442	2.69953	6.77421	4.26598	10.9431	7.52469	2.64769	0.213774	6.23279	5.49487	0.117703	5.09123
1.0581	7.35558	9.39031	3.97176	0.0577504	3.993	10.2036	9.819	10.1989	2.28658	4.36629	5.22245	3.154	8.22938	4.36481	10.2068	6.51905	3.05461	4.19354	5.80626	4.29297	0.622962	3.34913
2.0154	4.93395	9.64511	5.24236	2.0909	5.40405	15.3945	9.89484	9.23964	1.47413	4.83694	5.4085	3.32047	8.23084	4.23492	10.7762	7.60471	2.52403	2.40363	5.25822	5.18896	0.129324	7.21429
2.20444	8.30885	9.35042	5.69563	0.536793	5.82651	5.03919	9.59359	8.72515	1.49676	5.60096	5.6241	3.50261	9.68271	6.32067	10.9418	7.95737	4.12833	0.131512	0.975668	7.35409	0.158473	5.19659
1.64341	4.74088	9.41362	4.89009	0.503675	6.05264	1.6614	10.1484	7.98867	2.04166	4.51899	6.39562	2.85827	7.64003	4.75341	11.2679	8.09416	4.77176	1.1948	6.22954	6.14497	0.0650547	7.4042
1.32229	5.37866	9.41083	5.38987	2.25577	4.79449	5.65127	9.63005	8.83273	1.69704	4.49003	6.0392	5.28258	7.25509	4.85854	12.6361	6.96777	4.59232	1.21283	3.82571	5.67684	0.0438092	7.70972
2.37609	7.37579	9.64158	5.20452	2.28105	6.10256	10.0192	8.79402	7.86725	2.60651	4.51965	6.83001	5.69987	9.88968	4.94005	10.7185	7.54081	4.13124	1.55896	4.73215	6.02429	0.0501056	5.31605
1.87744	6.02449	8.34877	5.47378	0.0907482	6.77464	3.17234	9.42359	9.00512	1.13968	4.9986	5.96657	1.54442	7.6989	3.75706	10.3238	9.19465	4.17015	0.0640055	7.88177	6.37866	0.126942	1.4682
2.02373	6.92289	8.76	4.52875	0.365618	6.31125	2.85431	8.46952	8.74837	0.859681	4.41929	5.5336	2.19679	7.23929	3.07485	9.38307	8.02455	3.77877	0.226743	6.63011	5.71207	0.0464076	3.02623
0.747208	5.86257	9.73328	4.65389	1.25295	5.72119	1.86876	9.71412	8.53222	1.74463	4.55461	6.03878	5.0305	7.54512	4.21333	11.6742	6.2257	3.773	0.159835	4.53422	4.63289	0	6.06318
1.73667	4.34101	7.95766	4.41629	0.384934	5.37947	8.39503	8.58329	9.07805	1.4742	5.05088	6.00655	2.90523	7.49113	3.77058	11.0339	8.00847	4.52104	1.21097	5.54425	4.87186	0.0317015	7.50586
1.11495	6.23127	9.48319	5.52878	1.93956	5.90425	6.1886	9.78592	8.77188	1.3094	4.62526	5.26782	2.13995	7.99361	4.95606	11.3311	7.49013	3.28065	0.0794953	5.61617	5.0474	0.0774216	6.97898
1.43296	5.87676	9.29134	5.21971	0.562052	3.86622	6.23363	10.2409	9.21248	1.22058	4.24587	5.31902	4.12051	7.1616	3.03294	11.4307	5.823	2.64366	0.655638	4.94219	4.23844	0.13748	6.75837
1.49128	6.50053	9.11105	5.35662	3.61654	5.49058	5.22914	10.339	9.28797	2.00785	5.11906	5.91131	4.83239	8.84482	3.84501	10.6759	6.82763	3.18865	0.109317	4.9044	5.24597	0.640252	6.13808
1.44986	5.81665	8.78211	3.46204	0.0136729	4.25688	1.56527	9.75969	9.8215	0.573208	5.30538	3.12503	1.76471	7.68271	3.07244	11.68	6.02016	1.03537	0.7165	3.36275	3.49188	0.0572374	1.76472
1.06017	7.56855	9.3729	3.74428	0.380327	3.65705	6.72842	9.76058	8.93798	0.194482	4.3136	3.94036	3.06534	9.09621	3.29422	10.7352	5.30601	1.65948	1.82604	3.88421	4.07283	0.0159251	8.14058
2.13319	6.91968	9.40832	4.18084	0.431689	5.71909	3.97044	8.5587	9.39053	1.72693	4.53419	5.86333	2.67187	7.7547	5.45973	9.57912	8.14852	5.2294	2.37086	6.231	5.03175	0.0854359	8.14885
1.24314	6.08148	8.77016	5.19572	1.3892	5.0507	5.04177	10.65	9.71	0.864904	4.50964	5.5262	4.3267	7.76408	4.85056	10.998	6.41925	3.10959	1.93115	4.40069	5.24891	0.288417	3.02912
0.912993	7.33518	10.143	4.27619	0.828224	5.2976	2.48463	9.96265	9.58372	1.23029	4.64574	5.57751	2.11508	7.34682	5.84645	9.52489	7.22719	3.40558	0.310215	6.63589	4.49098	0.310727	6.13681
1.75255	8.50972	9.09009	5.34181	1.57563	5.52421	4.88917	10.9877	9.42632	1.19249	2.90392	4.01633	7.12057	10.306	6.07532	11.7902	6.52939	3.03875	0.439415	2.20045	7.37303	0	4.62722
0.758075	6.15696	10.1148	4.84724	2.46416	5.43075	1.90615	10.4501	8.39109	2.05761	4.64576	5.96033	5.47668	7.28472	5.46939	10.6133	7.45221	4.49654	0.582766	5.3615	5.3528	0.119684	8.77071
2.35363	4.33952	9.29236	4.96778	0.513369	5.4688	7.72926	9.98015	9.6583	1.64711	5.49295	6.11818	6.26416	8.02046	6.60269	10.3922	7.34622	3.39596	4.15619	6.60964	5.67531	0.0902899	6.24338
1.04398	5.62206	8.92307	4.19814	0.240295	5.00878	4.35059	8.14812	8.76468	0.634705	4.15251	4.34654	3.44206	7.66038	3.62166	9.54793	7.25469	4.0088	4.112	4.88507	4.85713	0.502191	6.17613
1.1213	7.23725	8.51577	3.4976	0.463508	4.04865	8.14399	10.3136	9.85964	1.56377	5.38595	5.46157	3.73123	7.94626	2.97562	10.6189	5.80814	1.07947	0.953062	4.42513	4.19154	0.112807	4.25484
1.17769	3.44399	9.40984	4.23186	0.11565	5.73686	5.0401	7.79253	7.75899	0.769454	3.64448	7.1771	2.64959	6.11778	4.35038	10.1955	7.14604	3.96039	0.711225	4.03025	4.55207	0.194742	7.14193
0.176867	5.0597	8.63201	2.58179	1.91017	1.89942	4.2222	12.9739	10.1484	2.10226	5.91594	6.15035	5.73692	7.16525	4.6214	13.6069	4.2534	0.468768	0.0927141	2.37636	4.19528	0.0903063	4.643
1.30431	4.59292	9.81909	5.36239	1.86222	5.27259	8.719	8.90896	8.55162	2.37661	5.46097	6.93052	7.01599	8.67513	5.19774	11.6766	8.97955	4.06108	0.0797584	5.32963	5.98352	0	8.10865
1.52684	8.96198	8.71717	4.50896	2.06539	4.39093	5.6348	11.2775	9.90672	1.59226	6.06832	4.5112	6.35805	6.97725	4.69405	10.4117	6.64023	1.54164	0.692704	4.22312	4.70891	0.0410136	7.45097
1.78949	8.14443	8.30945	5.18826	1.01433	5.1579	8.45727	10.8011	8.79642	2.23367	5.90923	5.83044	3.52028	8.53337	6.11543	11.8884	6.30607	1.60166	0.21567	2.53355	7.2219	0.0187437	4.03175
1.23887	6.78831	9.2992	4.84522	0.06374	5.58473	10.5092	6.8544	8.10859	2.02028	3.6068	6.28826	1.4636	8.93947	5.94181	10.2225	6.58838	4.0128	5.08355	4.76811	4.51526	0.11813	1.28767
0.953858	6.97535	9.20874	4.50139	2.24567	5.33856	9.72453	7.76348	8.97089	0.854277	5.09593	4.63151	4.6853	8.94447	4.41131	10.1417	6.98728	4.16092	2.39933	4.15555	4.73557	0.0808378	7.91592
1.39801	7.50436	10.6989	5.41251	2.33664	4.84416	3.8044	11.1519	9.10326	1.7127	5.1581	5.48789	6.06536	8.44904	5.66484	11.8189	5.30907	1.0211	0.0548136	5.33052	4.79884	0.0664119	4.43838
2.16778	8.09658	10.2539	5.00088	0.1422	5.52973	2.19879	9.67383	8.60347	2.63357	4.30467	6.17634	4.03187	8.43436	5.15488	10.5171	7.91737	3.72443	0.959097	5.93244	5.58764	0.0892344	7.43272
0.148775	5.7186	9.46577	4.94187	0.366657	4.62235	8.80495	8.80432	8.57274	0.948709	5.2573	7.33145	2.06974	8.03119	4.1761	10.149	7.00406	2.444	2.8889	5.0971	4.15684	0.0893453	5.06606
1.59413	7.70953	10.3874	4.85449	0.767714	5.00525	3.11989	7.89057	8.3104	0.755911	4.5179	4.04575	2.37524	9.02455	5.52916	9.51494	7.26201	4.71873	1.95149	4.68063	4.85652	0.0828787	9.16865
0.641662	7.40496	8.48369	4.7781	0.0648755	5.35784	3.18328	9.06281	7.96504	1.35231	4.63177	5.71239	3.74221	8.32464	4.3931	9.82464	7.07113	3.42538	4.17735	4.46327	4.13748	0.5635	3.49186
0.482745	6.82458	8.56774	2.72873	1.05126	3.77516	9.38479	7.65145	8.11508	0.464511	4.06168	6.56885	3.27581	8.86745	4.05892	9.21328	6.54427	2.37237	2.67887	5.92248	3.8656	0.214976	6.61071
0.326663	5.99388	7.55665	4.19028	0.0188994	4.9881	11.9762	9.64838	8.87529	0.342768	4.72267	5.20454	2.3424	7.05897	1.88057	10.8795	6.53868	0.861141	0.0146946	5.17825	3.85952	0.0178565	0.61229
0.368656	7.05482	9.77782	4.64485	0.834753	5.38324	5.13733	7.17271	8.32954	0.875681	4.99731	6.20587	2.86026	8.51223	3.48198	9.5227	8.24274	3.68669	0.0549595	5.83412	4.83365	0.0336781	1.60542
1.27778	7.03462	10.1182	5.26424	0.144233	4.29465	4.61432	8.04477	8.79944	1.63724	5.13877	4.74119	1.44943	8.92678	5.04721	10.1691	7.15144	3.74647	2.13681	3.87189	4.32254	0.396746	0.783461
1.37591	6.74298	9.65304	5.67702	1.72907	5.72524	2.90278	10.5454	8.79119	2.07473	4.39938	5.65085	5.20234	8.68319	4.62613	11.4351	5.32876	3.69717	0.291757	4.37957	4.63532	0.0455509	2.88253
1.22957	6.70078	8.85982	4.07342	0.0326745	5.06326	5.86714	6.36037	8.0398	0.487645	3.31485	3.72824	1.92656	8.53831	3.68597	8.558	6.12854	3.13509	3.02668	5.1597	3.34518	0.0907239	1.49842
1.5468	7.5848	8.76087	6.05236	1.84485	5.15421	4.36713	9.07662	8.67259	0.682802	4.43529	6.52705	2.54355	8.33312	4.95705	10.5339	7.96727	3.83871	0.0152809	7.28307	4.95558	0.142255	1.87728
0.585387	4.79936	8.99249	3.82815	0.82092	4.54856	8.14043	8.81179	8.3228	1.0367	4.84133	4.91115	3.1723	8.17492	3.64063	8.94307	7.41873	3.76144	2.83936	4.97439	4.36719	0.0852817	3.52039
1.61012	7.02197	8.82557	4.39521	0.101173	5.99127	8.35016	8.19174	8.34736	1.3688	3.99296	5.28707	1.32443	8.65474	5.17956	9.70403	7.8183	2.59498	0.303668	7.26373	5.32481	0.109919	3.54891
0.179371	6.85276	7.40224	4.20142	0.201497	4.11849	3.88893	9.20179	9.71423	0.702181	4.26048	5.76248	1.37345	8.55009	3.33248	9.64435	5.83555	1.44552	2.90789	5.85565	3.85613	0.277809	4.09325
3.88672	5.49446	9.57884	5.64201	2.71213	5.83071	6.61859	9.84123	8.20368	2.76703	5.1641	5.54417	8.31695	7.24185	4.10145	11.2783	6.88662	4.49236	1.39839	6.8638	5.42756	0.0724122	5.18579
0.295104	7.84491	8.98656	5.40915	0.48936	3.66375	6.61075	9.71382	8.70441	0.616429	4.78146	4.25015	1.40713	8.25031	3.91685	11.5587	6.11222	3.19112	3.30252	3.71253	4.60559	0.166135	6.66929
0.532679	8.06817	9.54045	3.45847	0.744218	4.05498	5.96586	6.93604	7.37555	0.742585	4.50145	4.75877	2.20764	9.43002	1.81209	8.84732	6.92031	3.24511	4.86856	5.03284	3.8988	0.199338	5.71775
1.79067	5.44527	10.2737	4.77459	0.915288	5.14765	8.56314	10.1293	8.92874	3.81763	5.45045	6.15739	5.86134	7.51015	4.54974	11.6431	7.63133	4.9723	0.473611	4.81283	6.51066	1.36801	5.42952
0.624236	8.03203	8.07031	4.16901	0.373763	4.27478	8.45484	9.03163	9.51158	1.54267	4.95096	4.77066	3.01882	8.98178	4.27155	11.4316	5.93132	1.25606	2.54822	3.24385	3.32702	0.223528	2.08603
1.2002	6.42298	9.72187	3.20423	0.0323595	3.0242	0.849756	8.44037	9.4623	0.470071	3.85765	3.12912	1.74302	8.54483	3.17149	10.0735	6.2162	1.7441	0.611954	3.82242	3.24023	0.551855	5.9026
0.801127	5.22594	8.70243	5.01789	3.87247	5.56146	6.37546	9.01145	8.33575	1.53325	4.74661	6.3922	2.33859	8.72293	4.4645	10.6073	8.38506	3.48001	1.55272	6.91716	5.41219	0.0597123	1.72991
1.64843	5.47256	9.01417	4.67366	0.085592	5.29981	1.92101	9.7427	8.95838	0.941981	4.12992	5.26838	1.77769	8.48626	2.18925	10.314	7.31273	2.86469	0.054955	5.86955	4.99544	0.0225374	6.04105
1.58709	7.2972	9.83721	4.60874	4.25554	5.28233	3.93018	8.92557	9.0174	1.5722	4.69994	6.0671	3.45165	8.10411	4.49591	9.97961	7.48479	2.65149	0.0550454	6.47627	5.24939	0.0666917	3.36888
1.78366	5.25479	8.80817	4.58543	3.26408	6.38274	7.48088	8.49641	9.17183	0.98604	5.02332	6.96193	2.22632	8.44216	5.42246	9.90819	8.57291	3.34737	0.0881294	8.14221	5.35148	0	1.57148
0.817738	7.67437	9.48025	5.34149	0.0786063	5.52441	4.08352	9.6536	9.46496	1.48802	5.61777	5.07659	2.04602	9.54267	3.89174	12.0174	7.91335	3.1953	0.137933	3.82995	4.83203	0.0175015	6.46552
1.12167	4.37431	10.0265	4.49981	2.11433	5.57471	2.27702	10.9249	10.192	2.39034	5.30542	5.97635	4.66069	8.11664	3.77242	12.1739	7.28792	2.02308	0.381113	5.53417	5.58865	0.173681	6.76668
2.10866	7.81505	10.2508	6.0727	1.81783	5.31015	3.91772	9.70021	9.00459	3.9554	5.76899	6.04855	7.0156	8.20273	6.14278	10.8819	7.69579	4.43244	0.0465196	5.61729	6.74025	0.309401	7.66608
1.32512	6.26422	9.59334	5.53839	1.73045	5.4591	7.0949	10.2793	8.82906	1.69698	5.21772	8.01341	5.4103	9.15845	6.42221	11.4352	7.54413	4.56394	0.326428	4.19788	5.42663	0.0864788	7.45765
1.3099	8.30094	9.13653	4.25908	1.75184	5.27841	3.71298	9.25563	9.39625	1.83116	4.42881	5.14247	4.46925	9.22294	5.34129	9.21015	7.21126	4.75233	1.53756	7.04222	4.99862	0.253012	4.92175
1.11983	8.05597	8.84837	4.29672	2.24027	5.33053	6.71435	9.72515	9.45583	2.04243	4.93308	6.10999	4.06919	7.91268	5.40051	9.62024	7.37695	4.11612	3.56275	6.71268	4.99878	1.40714	6.44867
1.18647	6.70369	8.57633	5.28268	0.598156	5.03541	5.16385	9.45644	8.52572	0.797461	4.41119	4.98075	3.57577	8.83144	4.26917	10.148	6.86628	3.31695	2.3228	4.96043	4.68105	0.107416	8.4437
1.38446	6.41634	9.13795	3.90401	0.157014	5.76753	8.65861	8.35509	8.58477	0.496745	4.3336	5.68966	3.17914	8.22342	5.28514	10.0201	7.91701	4.00186	2.7215	4.14833	4.4037	0.497239	5.6387
0.697408	7.36825	8.39315	3.7699	0.115353	5.70116	11.3727	8.31191	8.27612	0.448001	4.35375	4.90514	3.28132	8.37036	3.02368	9.04319	8.06475	3.81012	4.36239	5.46427	4.2041	0.109185	2.74924
1.03894	6.76563	8.2202	4.05877	0.759415	5.09655	6.04603	9.44166	8.76832	2.44046	4.05678	5.52709	4.6187	7.95542	4.82865	9.20902	7.24818	4.71311	1.96992	6.52609	4.80454	0.444873	6.76095
0.85445	6.92636	8.89968	4.83935	0.436285	4.99246	6.42052	8.42935	8.60177	0.752981	4.85953	5.08338	4.08903	8.83452	4.18969	11.0641	6.84544	3.95213	0.78949	4.17213	4.6764	0.0802116	9.74264
1.94564	7.26644	9.53468	5.54853	3.43743	5.42372	5.725	10.0226	8.6811	2.38428	4.87851	5.34523	5.54856	8.66159	5.61238	11.5857	6.57754	2.95908	0.679309	3.97807	5.8564	0.0590843	7.48769
1.53367	6.78754	9.19312	4.42876	2.05397	5.24618	8.37374	8.00256	9.25608	0.853191	4.74985	5.69394	3.85573	8.8902	3.70121	9.62359	6.87716	3.565	0.598944	6.07353	5.2201	0	5.05161
1.93744	5.69429	9.27446	4.4351	0.10721	3.96153	1.10076	10.8094	9.40762	0.721583	3.86218	4.80904	2.60919	8.71469	3.84905	10.8156	5.68096	1.08849	0.827002	4.76919	4.77704	0.160529	6.00216
1.52352	6.26153	9.1707	4.70687	0.928708	3.63034	5.0698	11.3126	9.27085	1.71295	4.31583	5.91627	3.20417	7.50417	2.99606	12.5053	6.03705	1.94367	0.0326306	3.68772	5.46424	0.0395993	7.22165
1.66553	6.68794	8.45307	3.86047	0.263517	5.00364	5.93448	9.76537	9.66593	1.75685	4.16608	5.81314	3.67629	7.76076	3.98525	9.91778	5.89222	4.98339	0.0191128	5.92313	3.92096	0.633757	3.40465
0.817635	6.73593	10.3993	4.23316	1.85805	6.21791	3.60403	9.30943	9.09451	1.35513	4.93761	5.09425	1.61804	6.84976	5.7346	9.23743	7.86663	5.17187	2.83589	6.22222	4.61855	0.388776	6.9326
1.56798	6.81785	8.53339	4.83216	2.05056	5.85237	1.20231	9.87755	8.93064	0.801167	4.76173	5.58781	2.18615	8.04423	3.86118	9.43588	7.98475	3.79511	0	7.04317	5.3223	0.0507914	5.27657
0.725509	6.43717	9.33543	5.15919	0.0428444	4.63742	10.6161	8.88183	7.51692	0.408368	3.85413	4.49599	2.21403	8.46561	3.05104	10.2532	6.47447	3.08859	2.54703	4.24548	4.17384	0.0854321	6.1631
0.543694	6.97857	8.44359	5.01648	1.5454	4.86934	2.22662	10.0306	8.16694	1.31028	4.21572	5.19288	4.8336	8.07314	3.50828	11.8392	6.77879	3.16168	0.420884	3.33198	5.06575	0.0378551	6.70346
0.815923	6.33852	8.97293	4.13363	0.892855	4.85436	6.16758	8.8927	9.44015	0.835542	4.66251	5.1252	3.12374	8.5909	5.17121	9.92955	7.15642	3.55208	2.94469	4.8642	4.34844	0.136696	8.14836
0.980674	5.92191	8.72835	4.1936	0.390489	5.41471	8.26332	9.70691	9.67639	1.06733	4.74927	6.28993	2.41862	9.06852	5.12351	10.2418	7.82456	4.46245	3.46117	4.67415	4.87528	0.019417	7.83762
1.91398	5.55803	8.39642	4.67941	0.116981	5.19302	6.35617	8.94327	9.22008	0.724974	4.36979	4.37767	2.52797	8.92061	3.22409	11.0431	7.18808	1.89594	0.0595708	5.74012	4.4663	0.0954209	3.95795
3.07769	6.97788	9.51261	5.34324	1.95842	5.00362	2.38213	9.0923	9.55381	1.55154	4.87273	4.77234	4.26656	7.10264	5.51189	11.2554	6.90113	3.14787	0.891533	5.23428	5.05537	0.0229068	6.88068
0.658193	6.90655	8.47224	3.48369	0.80504	3.70458	8.45085	6.66376	8.18873	0.558582	4.54956	6.981	2.03852	8.9405	3.05168	8.91057	7.09872	2.70154	4.17084	6.38015	4.04559	0.0594412	7.11098
1.4036	6.38642	9.03969	5.1994	1.52462	4.41496	6.70368	8.74476	7.66744	0.714263	4.88481	3.12227	3.49392	8.69351	3.65761	11.2192	6.52801	1.31729	1.17469	1.83143	4.53205	0.114192	3.72117
0.731457	4.49408	8.89538	3.89939	1.54409	3.65562	2.56545	6.87639	9.26806	0.374397	4.63082	3.79504	1.65457	8.65126	3.61609	8.94463	6.64502	2.07622	1.75588	5.7731	3.7393	0.0839807	1.48251
1.43281	4.7658	7.73461	4.09565	0.52057	4.33352	7.0492	9.27658	8.22414	0.707561	3.99238	5.7648	2.61882	8.10518	3.88998	8.05888	7.51444	3.46561	0.586457	6.0074	4.58107	0	1.4634
0.687293	7.71389	9.21987	5.87401	0.218061	4.12581	4.86055	10.6523	9.14935	0.840706	4.56597	5.88494	3.05459	7.70027	3.74956	11.2146	6.66138	3.76039	0.641607	5.25356	4.96067	0.101649	7.37908
1.56213	8.49299	9.58289	4.6208	1.27213	4.79957	3.43289	9.53582	9.29838	1.82082	5.1594	5.54993	3.31793	8.09585	5.13975	9.80751	7.12437	3.29375	0.690512	5.22691	5.008	0.217032	6.5596
2.06544	9.48321	10.319	3.75827	0.720104	4.62836	1.62987	8.47248	8.67325	4.24928	4.58121	6.39575	1.98757	7.00503	4.89602	8.72503	6.90591	3.89343	1.366	4.05889	5.443	1.15495	6.68453
2.39515	7.97368	10.3118	4.71227	1.68506	5.03552	8.5959	11.7481	8.33443	2.4125	5.16436	5.09172	5.83216	8.80804	4.97944	11.7812	5.56941	2.85991	0.561854	3.66672	5.73671	0.0383551	5.74137
1.12682	5.71443	8.48765	5.43569	0.0356066	6.00082	9.07423	9.41286	8.77698	1.4569	5.10396	6.77951	0.982923	7.88151	4.77538	11.0256	7.18928	3.53616	0.0549179	6.99428	4.87082	0.0501889	0.739834
0.895407	6.83894	9.34356	4.31555	1.46864	4.25417	11.5032	8.61044	8.20456	0.408215	4.98166	4.56948	3.53163	8.94255	2.65708	9.91775	7.24116	2.85153	4.10679	1.48963	4.6949	0.355566	2.96864
1.71068	6.75693	9.9432	4.75112	2.86152	4.28626	3.13598	10.6741	9.38116	3.20397	5.06467	4.75988	4.68099	7.79966	5.49123	13.478	7.06668	4.01015	0.520207	4.64275	5.07838	0.299914	6.18359
1.01919	7.0053	10.5159	4.17929	0.0980292	4.17721	2.70889	8.24961	8.18056	1.32629	5.04242	4.11094	2.62991	8.48343	3.53438	10.3426	6.38034	2.24506	0.796543	2.45984	4.15991	0.0871316	6.98412
0.846058	4.23848	7.01265	3.65623	0.530012	4.37363	7.28278	9.17591	9.51275	1.41658	4.99936	6.84205	2.07839	7.33715	4.23874	9.49091	6.22943	2.65045	2.62326	5.9947	3.74428	0.102156	3.67654
0.631336	7.48621	8.09537	5.11314	0.454195	3.77692	2.1532	10.2646	8.88985	1.44162	3.82204	4.81321	2.0696	7.8503	4.11076	11.6113	6.04961	3.72782	1.00842	3.21914	3.70284	0.125872	7.51143
2.68246	6.6713	7.6428	4.38596	0.53135	3.74214	0.929151	10.5717	8.76783	2.56325	4.47657	4.96545	4.20168	7.24837	4.53274	10.7163	7.30104	1.88399	0.149482	2.5653	4.95061	0	8.43923
0.79364	4.51998	6.9493	5.84775	0.132447	5.23021	3.88156	9.81161	9.24896	1.47684	4.41681	5.17393	2.68422	7.04111	4.20233	9.56718	6.87505	2.60436	4.63955	5.57022	4.30972	0.696487	6.15515
1.33804	3.14521	9.42006	5.1154	1.32125	4.79788	4.83353	10.5095	8.57911	2.76084	4.50921	5.8225	3.58707	7.83315	4.33383	11.4734	7.46109	4.28891	0.0613702	6.73555	5.73127	0.0252013	7.25733
0.467542	6.22216	8.83211	3.71669	0.281097	4.97285	1.78746	9.31198	8.94287	0.810821	5.21898	5.3345	3.33424	6.54715	4.13286	9.40088	7.27027	2.5111	0.32253	5.8592	4.86149	0.151628	6.94234
0.860456	7.98799	9.08883	4.92529	0.585468	5.24156	2.71915	10.4786	9.91673	3.01811	5.66244	5.31764	3.95511	7.60309	4.34205	11.4429	7.48253	3.35832	0.185426	4.69659	5.88933	0.115598	4.84021
0.578138	7.65592	9.17352	4.67522	0.911139	5.53989	2.97415	9.32605	8.98596	2.9941	5.57094	6.15732	3.4662	8.10815	6.09925	11.049	7.44975	4.23241	2.74522	6.06927	5.8896	0.357403	1.35968
1.75282	6.46121	8.33506	4.99424	1.95782	5.65161	15.9008	9.96577	9.03332	2.76393	4.9042	6.82785	1.54401	8.85703	4.79843	10.5207	8.13015	3.38025	0.20946	7.24581	5.20714	0.155816	1.27432
0.637814	6.70651	9.13343	4.78535	3.77703	5.61876	10.3826	10.0631	9.51871	1.27462	4.17968	5.25602	4.41141	9.00724	5.45739	10.7589	6.55922	3.76883	1.40422	6.2249	5.36284	0.114741	6.38206
1.78134	6.68038	9.03975	4.8878	0.118877	4.29091	5.08738	10.5671	8.95414	1.91166	3.83262	6.934	3.95253	7.28304	5.15894	11.0572	7.12446	3.81256	0.65548	5.71612	4.65056	1.13855	7.43227
0.813539	8.53103	9.19872	4.27557	0.343612	4.39649	3.64281	9.49717	8.3166	1.74715	5.58159	6.3753	4.407	8.43066	5.48657	9.84876	7.6121	4.34355	2.51806	3.0988	5.73584	0.102646	5.20814
0.93509	7.55214	9.07827	4.90856	0.0916468	5.30418	6.95495	8.98469	7.96314	1.64833	5.00262	5.37097	3.17399	7.45514	5.50244	9.73076	7.98937	4.08991	1.45202	4.67436	5.18447	0.773612	6.81102
1.23001	6.4059	8.6174	4.18716	0.053454	5.41856	10.5447	7.43282	7.7297	0.805229	4.59494	4.90968	3.00265	8.33045	4.12145	8.98444	7.4551	3.65226	1.69292	5.14184	4.42898	0.146593	2.63982
0.586878	8.63796	8.47463	2.80907	2.1061	4.3358	0.856169	8.81098	9.33123	1.717	3.57841	5.37562	2.55631	6.75711	5.5288	8.90793	7.19332	3.23099	0.0945445	4.88855	4.12938	0.185638	6.61685
1.51306	5.85457	8.17105	4.03835	0.613707	3.8517	8.06774	11.3544	9.63222	3.15348	3.39369	5.17646	5.75719	6.98933	4.85821	11.4552	5.66629	1.47162	0.45623	3.26821	5.37356	0.0258783	7.20204
0.467323	6.58353	8.35356	4.78077	0.340003	3.04556	11.2521	10.8994	9.04361	0.876382	4.4855	5.05557	2.75707	8.09433	2.55846	10.8748	5.83261	0.905559	0.380671	4.77533	4.1432	0	6.03999
1.91215	8.0627	9.22472	4.48006	2.41479	5.30405	4.663	9.75709	9.27109	1.61821	4.18574	5.74013	6.1435	7.55875	6.38637	10.7277	6.84729	2.14016	0.188523	5.32575	4.82049	0.133616	8.35263
0.82709	7.3029	8.50764	3.98412	0.0601716	5.31239	11.1797	8.34055	8.23187	0.391782	4.31757	4.50561	3.11162	7.81991	4.09659	9.56926	7.38394	3.37592	1.78403	5.94617	4.25154	0.0770411	1.91269
0.419835	5.99863	7.80988	2.91199	0.969255	3.09267	5.02552	7.47407	7.66452	0.314272	3.97506	2.98689	2.30643	9.02303	2.65716	9.76031	5.41773	0.849159	0.456092	0.311417	4.32426	0.01753	5.88502
1.88488	5.62006	9.05247	5.27767	0.330013	4.88066	4.49511	9.05412	8.06955	2.00226	5.28751	5.25151	2.13996	7.9481	5.23647	10.2807	8.0272	4.49255	3.36163	6.7781	5.57566	0.0617011	8.38661
1.11816	8.90001	8.67521	3.91402	0.363501	4.38128	6.43905	8.20733	8.88279	1.95784	3.82989	4.99065	3.84159	8.66771	6.70436	9.43457	7.45545	4.71701	0.320358	5.79368	4.83853	0.110495	3.13285
1.33678	7.71641	9.6996	4.28233	4.48705	6.43641	1.4557	11.2843	8.42544	0.681446	3.54381	7.51264	3.74236	9.37268	4.1442	9.6454	8.67549	3.40088	0.114164	6.5737	6.06292	0.0238885	7.13562
1.58871	5.5961	7.82978	4.17654	0.78392	5.07959	8.44502	9.40951	9.08753	1.35039	5.11399	4.61813	2.13185	8.58232	4.26411	10.3222	7.18505	3.55415	0.981137	5.72637	5.04786	0.0685948	4.64858
1.1802	8.55222	10.028	4.55408	1.77703	5.87442	5.81672	8.3425	8.46698	2.80242	4.73762	5.43222	3.91515	8.66934	5.0482	9.47783	7.53121	3.06654	3.96166	6.62686	5.08518	0.283959	7.54601
1.6918	6.14525	9.87557	5.33779	4.54897	5.70401	7.78367	10.5656	9.90912	2.54054	5.09767	4.49934	7.70584	9.36803	5.82163	11.998	6.83252	3.49034	0.262508	6.56755	5.86032	0.0529016	5.67389
0.958894	7.18172	10.1993	5.16519	0.091263	6.06852	8.78562	8.46401	8.14804	1.12949	4.29001	4.98774	2.62746	8.09093	4.35765	9.69865	7.69885	4.71774	3.17486	6.35982	6.06703	0.199153	10.0326
0.894158	6.36754	9.00545	3.87377	0.0891556	5.09972	7.96875	7.78066	8.40843	0.805063	4.81633	5.36257	2.49312	8.52167	3.80124	8.98755	7.79755	4.14884	3.72122	5.10474	4.29318	0.427421	7.73016
1.15805	7.6397	8.99818	4.44091	0.230985	5.20045	2.63465	8.87441	8.66009	2.22409	5.37167	5.65875	4.34106	8.3778	5.53878	9.75839	7.25008	3.14998	4.54616	6.32735	5.24244	0.369101	7.39018
1.37066	5.66264	8.71945	4.06359	0.566372	5.17093	3.26936	8.11505	8.98154	0.494507	4.30303	4.78508	1.83271	8.40653	4.72589	9.6645	7.95943	3.68679	5.68671	5.4034	4.77554	0.0221628	5.75204
1.42542	6.57602	10.1283	4.82926	2.26764	5.53578	5.59434	9.51501	8.31762	0.817997	4.17991	5.4122	3.16356	7.99596	5.2938	9.14145	7.07891	3.96957	0.444301	5.34536	4.57323	0.211568	8.0154
2.26149	6.21063	10.2739	5.70471	2.64029	6.57797	5.69853	9.5237	8.93884	3.14873	5.22995	5.52213	5.96954	8.09379	5.13348	9.79057	7.36327	4.51134	0.386253	6.13715	5.53627	0.169267	6.59962
1.68463	7.28678	7.67269	4.49855	0.0401428	5.70529	1.61172	7.5933	8.14947	0.900106	4.14318	5.04854	1.23955	7.02445	4.83203	9.96169	7.85879	4.3224	0.385912	7.15439	6.0993	0.0190962	2.1744
0.552095	7.22139	9.58638	5.544	0.771111	4.51693	7.08868	10.1306	9.11996	0.552715	4.32342	5.24103	3.75142	8.73577	4.03722	11.1133	6.56651	3.44235	1.05193	4.76457	4.92727	0.120413	8.67308
0.593399	6.33574	8.71874	3.75407	0.271795	3.66586	0.070804	8.24656	8.95469	0.545285	3.94052	4.90768	1.27895	7.11777	3.5229	9.48103	6.78292	3.42613	1.94545	5.48071	4.24366	1.46001	5.85896
1.41713	7.67581	9.50872	3.96993	0.335369	6.17703	4.27365	9.05581	8.4918	2.22746	4.41712	5.58403	2.24786	8.30173	5.20052	9.69363	7.85701	4.53081	5.30905	5.17634	5.02376	0.705121	5.12707
1.75304	7.37213	8.49242	4.22932	0.236211	5.67628	6.51183	6.97873	7.843	2.86708	4.24036	4.29579	2.27911	8.24865	4.53586	9.96669	7.14999	3.79061	5.40489	3.25087	5.57129	0.333603	5.31313
1.42817	6.82253	8.68104	5.59317	1.78194	5.8569	2.22303	10.3007	9.23318	0.605604	4.41919	5.14786	2.55429	8.5907	3.9677	11.3453	7.4291	3.15405	0.0910477	7.40212	5.63888	0	3.38354

## Sheet: LIHC-TCGA
sample_id	ZNF419	CDKN1A	HSPA5	EMC2	SLC7A11	NFE2L2	MT1G	HSPB1	GPX4	FANCD2	CISD1	FDFT1	SLC1A5	SAT1	TFRC	RPL8	NCOA4	LPCAT3	GLS2	DPP4	CS	ALOX15	ACSL4
TCGA-2V-A95S-01A-11R-A37K-07	1.17432	6.40225	9.35063	5.40288	2.90757	5.97119	3.51909	9.82658	9.01706	2.03937	4.23934	5.78052	5.41787	8.28271	4.57954	11.2597	6.76524	2.24888	0.283348	4.35978	4.60466	0.0742319	9.28669
TCGA-2Y-A9GS-01A-12R-A38B-07	1.21356	6.52902	9.53651	4.39683	3.33981	5.53994	4.74182	9.85334	8.53907	3.15709	4.5838	6.31794	5.02514	7.25209	5.66485	10.2216	7.12572	3.77322	0.592026	6.18691	5.38492	1.06851	6.34832
TCGA-2Y-A9GT-01A-11R-A38B-07	1.35558	7.50792	9.77984	3.93058	0.0693492	5.57687	7.35774	6.89344	8.41572	1.37597	4.12384	5.14758	2.67723	8.94364	4.46165	8.67434	8.04912	4.64358	4.8759	5.02209	4.36356	0.0563962	6.54974
TCGA-2Y-A9GU-01A-11R-A38B-07	1.64376	5.0539	9.83878	4.17774	0.404393	4.40778	0.631818	8.37156	7.92988	1.00861	5.11146	3.73243	1.3533	8.02384	4.92693	8.80266	7.54085	4.19929	3.92771	4.19672	4.93043	0.0729825	5.75986
TCGA-2Y-A9GV-01A-11R-A38B-07	0.7349	6.54481	10.0128	4.34626	0.329236	4.13163	10.6166	8.34082	8.40447	0.851887	4.22711	5.82407	3.00282	8.13113	2.51874	8.56533	7.81566	3.40077	1.12171	4.94607	4.36066	0.672907	2.35035
TCGA-2Y-A9GW-01A-11R-A38B-07	0.463294	6.95432	9.24094	5.62984	0.674218	4.62723	4.76046	10.2837	7.98924	1.11243	3.97883	4.36568	4.01085	7.41767	5.12389	11.2643	6.44173	2.36277	1.00153	5.85651	5.26507	0.129317	7.94287
TCGA-2Y-A9GX-01A-11R-A38B-07	0.990499	7.44922	9.22559	4.68761	2.45473	5.4929	9.2097	9.04232	8.5419	1.70473	4.86984	4.73579	4.1806	8.86196	4.5998	9.71861	7.60609	3.10876	3.11237	5.65278	5.30673	0.165146	6.58754
TCGA-2Y-A9GY-01A-11R-A38B-07	1.86771	5.20878	10.1025	4.99638	2.89744	4.93065	6.19397	9.4066	8.48683	3.0487	5.71686	5.06112	6.5416	8.40192	5.37155	11.3697	6.96	2.72777	0	4.68044	4.56543	0.0872331	5.57421
TCGA-2Y-A9GZ-01A-11R-A39D-07	0.647315	8.57471	8.67571	3.81227	0.0948747	5.27192	10.2383	7.79684	9.05715	1.22051	3.55889	5.92001	2.14628	7.67724	5.67416	9.00443	7.15974	4.01834	5.32427	5.3443	4.03066	0.784281	4.55095
TCGA-2Y-A9H0-01A-11R-A38B-07	1.73243	7.97731	9.88882	3.84913	0.492477	4.57758	10.0397	8.80565	8.47235	2.68255	4.65978	6.2696	2.8682	7.36478	4.60828	9.23159	6.56518	4.34847	1.61709	5.25539	5.24703	0.309809	4.75286
TCGA-2Y-A9H1-01A-11R-A38B-07	1.05137	6.33738	8.08288	4.85798	0.58181	4.04081	4.01014	10.8461	9.50103	0.386087	4.61815	4.80795	4.0733	7.9019	2.62889	12.961	5.79854	0.275257	0.276957	3.83883	3.8686	0.0245521	5.90994
TCGA-2Y-A9H2-01A-12R-A38B-07	2.38747	7.18003	8.20161	5.33496	1.13944	5.53745	5.27225	10.4553	8.12305	2.25271	4.71186	5.46709	5.01368	7.8604	5.37486	10.7095	6.94632	3.66368	2.2408	2.51413	6.42117	0.0476516	4.54726
TCGA-2Y-A9H3-01A-11R-A38B-07	1.28663	6.3275	8.86158	3.67556	0.20196	3.03079	1.71531	9.95401	9.09374	0.690019	5.19652	3.32975	3.35513	7.55255	3.1888	10.2164	5.79288	1.05208	0.38101	3.24329	4.48428	0.158484	5.88513
TCGA-2Y-A9H4-01A-11R-A38B-07	0.874487	7.16983	8.12028	4.55886	0.771156	4.75954	5.83387	9.65443	9.05758	1.45714	4.47227	5.62628	3.23515	7.78496	4.67712	10.1001	4.93983	1.53266	4.32534	5.466	3.80131	0.143108	1.9551
TCGA-2Y-A9H5-01A-11R-A38B-07	1.83463	6.89101	8.80047	4.69407	0.438496	4.97846	4.49689	10.2204	8.22043	1.23488	4.40449	5.63976	3.09021	8.41621	4.36658	10.503	7.66967	4.21925	0.924944	4.50144	5.25131	0.0732111	8.51433
TCGA-2Y-A9H6-01A-11R-A39D-07	1.52023	6.32766	9.05048	3.92948	0.874954	4.47218	0.292772	9.76753	9.38804	1.38477	3.99128	4.14966	3.73038	8.36582	4.79076	9.61311	6.68111	3.28359	3.77183	2.77621	4.41665	0.114527	7.53337
TCGA-2Y-A9H7-01A-11R-A39D-07	1.53443	5.36191	9.84864	3.86531	0.0695006	5.14393	1.35494	9.68176	9.17221	1.29362	4.37512	5.335	2.45092	6.92195	5.15267	9.98826	7.38332	5.11776	1.37207	4.14142	4.53214	0.312132	8.93007
TCGA-2Y-A9H8-01A-11R-A39D-07	1.3212	6.94592	8.69222	3.56944	0.153356	4.2405	1.06963	10.4552	9.00422	1.40141	4.10505	4.40195	3.26929	6.80524	5.51242	8.83313	7.12065	3.72354	3.97183	4.2	5.04961	0.0216678	7.50209
TCGA-2Y-A9H9-01A-21R-A39D-07	1.26603	6.93296	9.02283	4.31223	0.561638	4.78467	1.63237	7.76642	9.56883	1.57377	4.81946	5.79024	2.11192	9.4121	3.86147	9.4708	7.0416	3.22547	5.13267	5.5355	4.29852	0.162197	6.01494
TCGA-2Y-A9HA-01A-11R-A39D-07	1.88375	4.35924	9.04368	4.97813	2.79992	5.90534	9.08906	9.74722	9.33138	1.99384	5.57433	5.91246	3.3715	6.92505	5.32554	10.5132	8.45875	4.48443	0.0873702	7.66873	6.60236	0.0885361	5.80451
TCGA-2Y-A9HB-01A-11R-A39D-07	1.31854	6.3603	8.9002	4.35393	0.909747	5.37963	0.551202	7.35959	8.28027	0.797325	4.93357	5.67724	2.51428	8.52615	4.41428	9.42774	8.0265	3.62926	3.81131	5.25114	5.72036	0.178634	8.24805
TCGA-3K-AAZ8-01A-12R-A39D-07	1.14442	5.95321	9.36647	4.87285	0.0688733	5.41262	0.274537	9.82531	9.0533	0.626818	4.71559	5.60786	2.04601	8.64978	4.66431	10.6255	7.11719	2.69321	1.63256	5.22681	5.01493	0.225688	7.23637
TCGA-4R-AA8I-01A-11R-A38B-07	2.07497	5.17815	9.84111	4.62314	0.887365	4.5073	9.79479	9.08328	7.86707	2.10398	4.85572	4.90611	2.58858	8.63336	5.03335	9.32568	8.40068	3.30182	3.34701	5.79489	4.55453	0.477131	2.48941
TCGA-5C-A9VG-01A-11R-A37K-07	0.953151	5.59924	10.7753	4.90601	0.443791	4.43775	8.48993	9.05299	9.05299	2.47725	5.65488	4.60095	2.8627	7.75108	6.27814	11.5037	7.80291	4.07928	2.7746	4.20346	6.59519	0.123693	9.1749
TCGA-5C-A9VH-01A-11R-A37K-07	1.64946	6.05025	9.33483	5.33484	0.378719	5.07479	2.84331	11.1178	8.61088	1.6868	4.30774	5.27836	3.03946	8.11204	3.5377	11.4335	7.02582	2.69466	1.35261	5.53506	5.48406	0	7.85825
TCGA-5C-AAPD-01A-21R-A39D-07	1.63598	7.56791	9.5698	4.18732	0.178991	4.37597	6.17004	11.2722	9.4896	1.57748	3.64186	5.69643	5.43847	8.33197	4.16616	10.1894	6.43232	3.29925	0.664078	4.68994	4.72479	0.27005	5.22357
TCGA-5R-AA1C-01A-11R-A41C-07	2.25712	7.6667	9.39727	5.3684	3.48206	5.4347	2.37173	8.34352	9.1425	1.47278	4.99228	5.23354	1.72708	8.06712	5.9395	10.0171	8.20186	3.53664	0.130316	7.91821	5.61412	0.0542702	1.99644
TCGA-5R-AA1D-01A-11R-A38B-07	0.954581	5.58739	8.69745	4.70303	0.713916	4.68602	11.6211	8.23414	7.90153	0.569539	4.50327	4.41668	3.82021	8.43201	3.91918	9.82188	6.83061	2.23157	4.06007	2.55486	4.34434	0.250396	4.21054
TCGA-5R-AAAM-01A-12R-A41C-07	0.785826	6.16903	9.51801	4.77474	0.447014	5.06035	7.46273	8.92693	8.79323	0.848191	4.38792	5.72269	3.7323	8.01192	3.57074	10.0239	7.27667	4.66256	2.51012	5.55096	4.69529	0.360536	2.27546
TCGA-BC-4072-01B-11R-A155-07	1.88683	6.25567	9.46747	5.8871	1.22434	5.34487	5.30599	8.66067	8.20404	2.67123	6.03537	4.75457	4.17028	8.3995	5.57321	10.7493	7.00149	4.63607	1.56671	4.65625	5.55137	0.358526	6.72175
TCGA-BC-4073-01B-02R-A131-07	0.814386	7.43468	10.2901	4.50218	1.83265	5.57592	3.65533	9.00081	7.99854	3.07531	4.78257	6.96356	5.32175	7.77418	7.47181	10.2693	8.48257	6.1364	0.40405	3.84092	5.56769	0.184098	4.50046
TCGA-BC-A10Q-01A-11R-A131-07	1.15551	7.39148	8.78815	4.69579	0.384312	5.1743	0.705633	11.028	9.05232	2.29367	5.34599	4.37062	3.07846	7.67499	6.80317	10.3736	7.32788	2.83852	0.580262	1.0279	7.57783	0.0438879	3.63315
TCGA-BC-A10R-01A-11R-A131-07	1.00629	5.1527	8.4623	4.45017	0.283164	5.17141	4.272	8.56939	9.42478	0.66876	4.30429	3.91719	5.15254	8.75629	5.8068	8.95576	6.77835	5.57227	1.42732	3.30513	4.85104	0.432539	6.34516
TCGA-BC-A10S-01A-22R-A131-07	0.516478	6.395	8.30232	5.19458	0.0825197	5.31313	8.09039	10.5408	8.80289	0.560105	4.57527	4.39475	3.54674	8.32242	3.15098	11.1375	6.9952	3.38659	1.48139	4.68198	4.33811	0.083477	5.70056
TCGA-BC-A10T-01A-11R-A131-07	1.02526	7.0118	8.12198	4.57545	0.402609	5.77618	8.8579	8.92913	8.30095	1.67345	5.00536	7.5128	2.8168	7.55477	4.16872	10.1616	7.08855	3.16824	5.53214	4.99578	4.80667	0.53174	2.78454
TCGA-BC-A10U-01A-11R-A131-07	1.19794	7.06966	8.49853	4.6522	2.79186	5.50885	2.92477	8.6194	9.216	1.19751	4.45426	5.56955	4.57001	7.84107	6.07028	10.3092	7.54262	3.42219	0.284597	4.73986	5.37233	0.138894	10.3421
TCGA-BC-A10W-01A-11R-A131-07	1.44425	9.14313	9.80562	6.46182	4.70154	6.39022	6.14188	10.0824	7.76775	3.23847	6.01499	6.85834	5.35548	7.82123	6.29129	10.8271	7.94477	4.40442	0.770664	7.08594	5.68186	0.186553	6.0634
TCGA-BC-A10X-01A-11R-A131-07	0.699182	6.85513	8.23713	4.18184	0.171812	5.74172	11.6628	7.86596	8.32373	0.632775	4.33627	5.10466	3.11902	8.22877	3.75784	9.30078	7.97865	4.11309	1.08614	5.38695	4.50522	0.108878	2.98708
TCGA-BC-A10Y-01A-11R-A131-07	1.05134	9.16319	9.13494	4.57431	0.346435	5.62261	6.79095	9.83759	8.79943	3.45639	4.17437	6.51768	2.87585	7.81441	3.84145	9.83393	6.77974	5.07582	5.3024	5.45798	4.64364	1.78326	2.50279
TCGA-BC-A10Z-01A-11R-A131-07	0.960697	9.1216	9.38541	4.38941	2.6104	6.24703	4.6191	7.67556	9.42659	2.00366	4.99119	8.14408	5.42671	5.37371	5.18143	9.08292	7.71983	6.10291	4.70671	7.13863	5.08902	0.72183	6.41839
TCGA-BC-A110-01A-11R-A131-07	0.590828	8.43968	8.36144	3.65514	0.116421	5.36779	11.8283	8.06495	8.19592	0.642619	4.16267	4.63192	4.21257	9.19299	3.91949	9.56522	6.55248	2.87387	1.83361	4.15754	4.02412	0.0339519	4.71751
TCGA-BC-A112-01A-11R-A131-07	1.5367	6.69848	9.06165	5.00167	4.50151	5.80934	3.58411	9.48363	8.7286	1.93198	5.43408	4.85664	7.21491	7.53821	5.5467	10.7807	7.06645	4.60108	0.13977	6.3639	6.29868	0.025283	4.99386
TCGA-BC-A216-01A-11R-A155-07	1.71441	7.69202	8.45557	4.22374	0.335258	4.95921	4.28992	8.53895	7.73747	3.57404	4.43002	5.07782	4.83599	8.10187	4.54534	9.96577	7.10878	4.36146	1.76351	3.05683	4.64154	0.0893619	8.00081
TCGA-BC-A217-01A-11R-A155-07	1.93637	6.58866	9.69569	4.40048	0.510851	5.49799	5.47155	8.29404	9.89211	3.13681	5.55154	5.14474	4.02381	8.20018	4.2428	9.96925	6.54232	2.19803	1.89588	4.37702	4.36484	0.771708	4.73167
TCGA-BC-A3KF-01A-11R-A213-07	0.948491	6.72353	8.22209	4.54006	0.277148	3.72252	8.12204	10.2754	8.78451	1.30499	5.49173	5.76553	3.53363	7.91455	4.76716	9.21166	7.72688	4.11761	4.46134	5.75639	5.53309	0.0814423	6.29874
TCGA-BC-A3KG-01A-11R-A213-07	2.27723	8.58201	9.64022	4.3607	0.787443	4.72623	2.85287	8.8968	9.33032	3.88934	4.73448	6.0064	2.76262	7.49882	4.55772	8.98703	7.83154	4.43557	1.57183	3.69153	5.72191	0.0390374	8.05711
TCGA-BC-A5W4-01A-11R-A28V-07	2.04557	6.40538	9.10016	3.76418	0	5.44045	8.95399	11.2069	8.75785	0.794467	4.0303	7.01001	0.985403	7.99556	3.30977	10.1557	6.43062	1.81208	0.0430988	6.38378	4.08461	0.827568	0.516671
TCGA-BC-A69H-01A-11R-A311-07	1.72612	4.73337	9.52385	4.73254	0.601563	3.79483	6.45233	11.5411	9.52067	2.05214	5.79598	6.15576	5.55614	7.39252	5.1437	12.8873	6.6211	1.80577	0	4.32569	4.71872	0.0930624	5.87078
TCGA-BC-A69I-01A-11R-A311-07	1.51184	7.89524	8.26463	3.81923	0.0551865	5.4305	10.9717	9.50021	9.04403	0.415187	4.65658	4.58502	3.29575	9.21463	4.38343	9.75791	7.17314	2.30617	0.108152	6.22303	4.33339	0.0448378	4.08292
TCGA-BC-A8YO-01A-11R-A37K-07	1.96111	7.43189	9.97575	4.99353	2.32945	6.01377	3.82529	9.69306	8.14292	3.43034	7.11118	5.70686	3.96531	7.76871	5.91905	9.69067	8.62241	4.87402	0.546463	5.62563	5.62877	0.161992	5.49342
TCGA-BD-A2L6-01A-11R-A213-07	1.5896	8.51291	8.54824	3.63466	0.119429	4.42396	12.8257	8.74036	9.26887	1.78173	4.93131	5.53247	2.17579	8.17636	4.48137	9.58281	6.99704	1.87942	1.05691	6.02178	3.96803	0.3621	1.79529
TCGA-BD-A3EP-01A-11R-A22L-07	1.10659	5.4453	9.44184	4.68079	0.597205	5.08653	7.17955	9.64373	8.92603	1.65115	3.77409	5.05805	4.08491	7.83226	4.66522	10.3322	6.61363	3.62202	0.28196	5.19398	4.87443	0.232725	7.57443
TCGA-BD-A3ER-01A-11R-A213-07	0.658932	6.90363	9.17266	4.35351	1.11591	4.83619	6.87339	9.03787	8.21815	0.64583	3.86073	5.35286	3.78277	7.98126	4.53893	9.57797	6.60958	4.17072	1.92988	4.03675	4.83638	0.078047	7.98341
TCGA-BW-A5NO-01A-11R-A27V-07	1.44921	8.84186	9.1678	3.81007	0.877594	5.02753	7.65345	9.16601	9.47723	1.81188	4.21089	7.87297	4.11584	6.65108	4.79764	9.76863	7.00993	4.36772	3.23678	5.60854	4.71738	0.582964	7.40625
TCGA-BW-A5NP-01A-11R-A27V-07	2.36537	6.19952	10.0969	5.12419	0.104907	6.31926	2.26622	10.0163	8.62281	2.55001	4.52516	5.34363	5.93244	6.34841	5.80956	13.2448	8.33672	4.18847	0.365818	5.51808	5.51918	0.106115	8.40371
TCGA-BW-A5NQ-01A-11R-A27V-07	1.54704	3.52495	9.53896	4.86884	0.948599	5.86966	11.3507	9.15115	9.16228	3.39372	5.10725	6.77455	3.40439	7.54972	5.00765	10.6463	8.16345	4.21367	0.197967	6.62102	6.86327	0.176486	7.66273
TCGA-CC-5258-01A-01R-A131-07	0.999292	5.77998	8.90505	5.12165	2.4558	5.38184	3.15948	9.02719	8.27566	2.55564	4.70121	6.57921	6.04765	6.77065	5.9168	12.0396	8.18344	5.37867	2.21047	6.03727	5.40592	1.27425	10.2491
TCGA-CC-5259-01A-31R-A213-07	1.2073	3.92857	8.66092	3.45694	0.065034	3.11635	9.40172	10.2532	8.46298	0.339609	3.87539	5.21152	3.14972	8.67856	2.34826	11.062	6.04296	0.296995	0.0219662	1.78574	2.82846	0.0528723	6.8429
TCGA-CC-5260-01A-01R-A131-07	2.29591	7.88655	9.72344	4.76899	3.03981	6.32646	2.07817	10.3311	8.81689	3.75417	4.0302	6.53976	6.98653	8.86416	6.33389	11.0476	7.50811	3.50078	1.19803	3.88595	7.7185	0	4.78595
TCGA-CC-5261-01A-01R-A131-07	2.37353	8.74824	10.0277	5.00419	0.721694	5.76032	3.80583	8.91855	8.84837	2.3946	4.51814	6.4759	5.98151	7.71546	6.30896	10.563	8.16881	5.36283	1.02285	4.84975	5.66623	1.29849	8.82772
TCGA-CC-5262-01A-01R-A131-07	1.865	7.64596	8.72491	4.22958	2.22744	4.886	5.29624	9.70424	9.58676	1.65274	5.02513	6.11614	5.41624	8.6381	6.06824	11.146	6.86305	4.35687	1.1606	5.30166	5.50429	0.0244325	8.11357
TCGA-CC-5263-01A-01R-A131-07	2.18763	7.60835	10.8714	5.05272	1.96289	5.49537	3.27299	9.87331	8.79364	3.51636	4.96161	6.807	5.42805	7.61955	6.20441	10.4902	8.12369	4.97818	0.0589008	4.96567	6.43102	0.266369	6.71971
TCGA-CC-5264-01A-01R-A131-07	1.50574	7.7499	10.0786	5.08362	0.949027	4.59871	9.94711	11.0505	8.77509	3.79521	5.68923	7.55119	4.44273	7.27824	6.29195	10.5283	9.13071	5.58321	1.23047	5.39805	5.97853	0.44313	8.58022
TCGA-CC-A123-01A-11R-A131-07	1.78449	5.69331	10.1935	3.64218	0.114993	3.18193	10.8656	8.58465	9.15418	1.2826	5.35618	5.76175	4.73521	7.5363	3.3779	12.1782	5.78694	0.333071	0	3.12287	4.64337	0.0877218	6.6359
TCGA-CC-A1HT-01A-11R-A131-07	2.32765	6.66986	9.07255	5.90886	3.71082	6.23976	4.18419	10.5284	8.94698	3.69097	5.56298	5.16246	6.61457	9.27001	6.34437	11.6129	6.24153	3.74982	0.221797	3.44821	5.97837	0.0788245	5.13151
TCGA-CC-A3M9-01A-11R-A213-07	2.11749	6.29618	9.57088	4.70337	0.681504	5.03016	5.45763	10.1304	8.81191	3.99569	5.75319	5.22965	8.46152	9.3435	5.33947	11.5391	6.98576	2.9712	0.0999728	6.18563	6.05561	0.232141	6.71924
TCGA-CC-A3MA-01A-11R-A213-07	2.51495	4.78544	9.70106	6.06015	0.734498	5.58983	7.22423	9.04252	7.99868	2.66663	5.64106	5.54811	4.22377	8.49186	5.79815	11.5804	7.38848	3.6406	0.226923	2.17301	5.76987	0.0452743	4.59293
TCGA-CC-A3MB-01A-11R-A213-07	0.558099	6.94801	9.35624	5.40878	2.32445	5.2623	5.99331	10.3578	9.21587	2.71217	4.92486	6.92938	5.48437	7.65615	4.06941	10.8112	7.30679	5.1069	0.562669	5.53317	5.40855	0.0177028	7.74634
TCGA-CC-A3MC-01A-11R-A22L-07	1.26466	8.37989	9.33045	4.89173	1.9912	4.85711	4.5609	8.87595	7.79929	1.69267	4.823	4.85758	5.04352	7.20552	5.92097	10.2775	6.83522	3.86453	2.31305	5.30804	5.14893	0.0216746	6.76714
TCGA-CC-A5UC-01A-11R-A28V-07	1.43144	5.34265	9.54154	3.85086	1.31164	5.00906	6.79565	9.24276	8.26328	2.38723	5.31946	7.14418	4.2442	7.89531	4.60408	10.817	7.64332	4.87562	0.610099	3.71231	5.2914	0	7.3754
TCGA-CC-A5UD-01A-11R-A28V-07	1.61034	6.47491	9.55203	5.35889	2.50836	5.72498	4.20064	11.2054	7.72382	3.33929	5.00607	7.59596	7.99956	7.57344	5.43396	11.0367	6.72422	4.79281	0.165694	7.10181	6.21358	0.0524353	3.75713
TCGA-CC-A5UE-01A-11R-A28V-07	1.85866	5.67787	9.33491	5.74726	2.24584	5.71483	6.80398	10.5787	8.61185	2.6525	4.8692	7.50134	5.30614	6.62205	5.53391	11.6088	8.02356	3.94975	0.267555	6.12669	4.84898	0.546319	8.24332
TCGA-CC-A7IE-01A-21R-A38B-07	1.1207	5.50861	9.19482	4.88895	1.13217	5.419	3.92862	9.23087	8.34997	2.67286	4.24799	5.24941	5.28115	8.13394	5.40661	12.4	6.62551	4.51045	0.162911	3.40264	5.37865	0.0682932	9.0912
TCGA-CC-A7IF-01A-11R-A33J-07	0.679505	6.67266	7.66461	4.83137	0.12044	4.43111	0.305352	8.91242	8.56359	1.07577	4.08843	5.20309	3.31137	7.48462	3.41048	10.1806	6.26759	2.19616	3.21117	4.46637	3.49653	0.256721	0.819472
TCGA-CC-A7IG-01A-11R-A33J-07	0.858447	6.84161	9.11573	4.63142	0.496863	3.50354	2.65244	10.9779	10.1677	2.38215	5.09412	5.02148	7.28752	7.67919	4.54855	11.898	6.31755	2.04219	0.130376	3.75599	4.8763	0.0609411	7.12969
TCGA-CC-A7IH-01A-11R-A33J-07	1.7663	5.55221	8.85721	5.73888	1.77652	5.99024	2.52158	10.0147	8.84818	1.11225	4.71377	5.87508	1.53408	8.63923	2.33022	10.3196	8.18792	3.17825	0.0792992	7.46605	5.34927	0	2.55052
TCGA-CC-A7II-01A-11R-A33J-07	1.90481	3.41121	9.72761	5.80044	0.200679	3.6524	11.428	9.77146	8.52096	3.42938	5.021	5.79607	7.09728	7.18157	5.71948	14.1453	6.06146	2.95617	0.21466	1.99027	6.41369	0.0232749	2.798
TCGA-CC-A7IJ-01A-11R-A33R-07	0.760682	7.5031	9.56036	4.63335	5.22419	6.28499	5.14477	11.4551	7.60109	3.62442	5.02996	5.89344	9.3899	9.50989	7.96207	11.1573	7.09129	3.46898	0.198549	2.29014	6.73902	0.839755	5.03022
TCGA-CC-A7IK-01A-12R-A33R-07	1.63403	4.90851	9.68374	5.47886	3.94941	6.44415	7.11243	8.61728	8.66334	2.42422	5.13151	7.11604	4.99646	6.67444	3.83089	11.0427	8.25722	3.07586	0.122998	8.66509	5.84332	0.0866007	3.21552
TCGA-CC-A7IL-01A-11R-A33R-07	0.888921	5.33925	9.2065	4.42982	0.469973	5.02563	0.695122	9.24826	9.54238	1.20438	4.52122	5.57873	0.934358	7.24942	3.90609	10.2441	7.08827	3.11505	1.39031	5.64947	4.19234	0.0150571	5.97448
TCGA-CC-A8HS-01A-11R-A36F-07	2.75675	7.00325	9.69262	4.91976	0.191024	5.20746	2.16213	9.80147	8.5734	2.97319	4.45708	5.3565	4.44672	7.14221	5.29129	10.4924	7.36819	3.4778	1.29506	3.68879	6.14575	0.577544	6.2053
TCGA-CC-A8HT-01A-11R-A36F-07	2.24533	5.41814	9.39436	4.62984	2.71567	4.75749	5.17031	10.0528	8.73877	3.04325	4.88758	5.27775	5.69616	7.63055	5.19698	10.9221	5.96918	3.09425	0.259818	5.49785	5.59326	0.0676528	6.8964
TCGA-CC-A8HU-01A-11R-A36F-07	1.26747	6.64673	8.05927	4.1603	0.141819	4.62053	8.53606	11.0864	10.1706	2.82215	6.09248	5.17185	4.8926	7.42395	4.43809	10.5451	7.51071	4.20437	2.51261	5.69228	6.56103	0.219874	3.46041
TCGA-CC-A8HV-01A-11R-A36F-07	2.35845	5.09079	8.83761	4.34249	0.893867	4.61379	3.35154	10.4728	8.62238	2.79235	4.67222	4.668	6.1322	7.01677	4.37567	10.9854	6.68881	3.00869	0.221045	2.81006	4.88583	0.193931	8.95062
TCGA-CC-A9FS-01A-11R-A37K-07	2.72092	6.6528	8.91124	5.41549	0.837328	5.555	3.52201	9.34827	9.23952	1.37017	4.84183	3.99321	2.20054	8.2898	3.9162	11.2094	7.5256	4.11632	2.91388	7.24854	5.0318	0.574663	3.99434
TCGA-CC-A9FU-01A-11R-A37K-07	2.62978	2.26162	10.0872	4.22717	2.05784	5.11849	6.18736	10.3072	9.37796	2.39998	5.23138	5.21396	5.98977	4.89969	6.40734	11.3113	8.22794	4.34644	0.129044	5.02162	5.4738	0.328965	7.81409
TCGA-CC-A9FV-01A-11R-A37K-07	1.70926	7.47345	8.4556	4.80302	0.253927	5.16542	0.890182	10.6558	8.9329	1.02245	6.21578	5.21908	3.99502	8.91394	4.53628	9.75438	7.46834	2.64209	0.0221286	6.00968	6.65975	0.104622	4.17644
TCGA-CC-A9FW-01A-11R-A37K-07	1.30844	8.00919	9.18807	4.68757	1.94215	4.58597	1.53972	11.105	9.81498	2.08357	5.24485	7.2043	2.41969	6.81695	3.61132	11.051	8.37716	4.95435	1.30008	5.70984	6.36958	0.171303	8.89372
TCGA-DD-A113-01A-11R-A131-07	0.645965	8.96978	9.0814	5.03995	1.28972	5.30268	2.37386	9.64284	8.3358	1.87388	5.11333	5.01764	4.28645	7.34299	5.85087	9.92183	7.43082	3.43476	3.65658	2.75165	5.27155	0.0508987	6.11887
TCGA-DD-A114-01A-11R-A131-07	2.14531	8.58614	9.69168	4.44735	1.74992	5.78195	5.6406	9.8829	9.57137	3.27247	4.74511	6.72991	7.56179	8.1417	5.85015	10.0465	7.2516	4.6298	1.15081	6.2666	6.23076	0.171655	6.66248
TCGA-DD-A115-01A-11R-A131-07	1.14678	7.55798	8.97005	3.551	1.1937	4.96833	8.30177	8.63444	8.69958	2.10216	4.49042	5.3891	2.30551	8.41522	4.94662	9.34484	7.23608	4.09367	5.76264	3.85892	3.99472	0.322968	2.96729
TCGA-DD-A116-01A-11R-A131-07	0.983215	6.56243	7.45561	4.96701	3.93788	4.75895	7.68925	10.3528	9.05496	1.09028	5.44625	5.64701	2.05892	9.53847	3.81366	11.0265	7.2541	2.41975	0.0771275	7.5023	4.88483	0.231056	3.16949
TCGA-DD-A118-01A-11R-A131-07	1.23547	6.33993	10.2711	4.87876	0.916629	4.49445	0.615504	9.19162	8.12707	1.14566	4.78077	4.16903	2.63585	8.2572	5.34896	9.92546	7.29129	4.8995	0.488519	2.63066	6.42659	0.0454057	4.45895
TCGA-DD-A119-01A-11R-A131-07	0.770283	5.8468	8.76457	5.49269	0.419888	4.57865	2.44742	10.0011	8.99501	0.647211	5.03639	5.3497	3.10022	8.6897	4.24512	11.4876	6.43297	0.403782	0.320774	4.18463	3.88057	0.0173753	6.87264
TCGA-DD-A11A-01A-11R-A131-07	1.19433	7.10902	8.91466	4.68534	1.05276	5.99182	5.26767	10.3305	8.67134	1.76427	5.45244	7.66447	3.05291	6.89133	5.50114	9.66304	7.76772	4.68325	5.61228	5.25464	5.24746	1.33084	3.7364
TCGA-DD-A11B-01A-11R-A131-07	1.48182	6.40636	8.52979	4.29227	0.0480045	5.47192	2.22259	7.26632	8.17077	1.19594	5.351	4.87066	1.34427	7.60632	4.87083	9.00367	8.14987	4.49808	4.11936	6.83894	4.73391	0.630226	7.00294
TCGA-DD-A11C-01A-11R-A131-07	1.24528	7.41363	9.09646	4.57446	0.198519	5.62832	0.942198	9.29239	8.91927	2.86563	4.29259	4.15774	2.94222	8.31436	6.01276	9.58851	7.56622	4.89749	5.10341	5.7808	4.56727	0.76944	4.6756
TCGA-DD-A11D-01A-11R-A131-07	1.3717	6.99452	9.62297	4.17299	0.292305	5.07274	6.54575	9.19459	8.77511	0.684421	4.04387	6.23084	2.42795	8.50485	5.44335	9.19033	7.83345	4.60771	4.01731	6.03866	4.38678	0.352403	6.92264
TCGA-DD-A1EA-01A-11R-A131-07	1.16718	6.55805	9.31753	4.39199	2.70259	5.82659	4.31512	8.31916	8.47637	1.72204	4.35451	6.54532	2.66193	8.1093	3.69911	8.89627	8.40778	3.93929	0.10535	6.73508	5.38062	0	6.04161
TCGA-DD-A1EB-01A-11R-A131-07	1.49277	6.95034	9.72328	4.14063	0.0364939	4.60433	4.27675	8.37063	8.64505	0.741946	4.47064	5.88765	2.12163	7.79964	4.30539	8.45155	8.1759	3.64077	2.19914	6.2067	4.88259	0.858365	5.76022
TCGA-DD-A1EC-01A-21R-A131-07	0.678536	6.40127	9.38808	4.80977	2.31867	5.61749	6.68284	8.17285	8.31716	1.83809	5.09414	5.52108	4.63936	10.3403	5.5064	10.1963	7.51419	4.27065	0.70212	2.92143	5.63379	0.433019	7.42462
TCGA-DD-A1ED-01A-11R-A155-07	0.605333	7.18089	8.57752	3.86902	1.38127	5.82226	10.915	6.81396	8.00562	0.363605	4.15469	4.80197	2.58779	8.6946	3.00729	9.00281	7.24918	3.69809	0.65168	5.03354	4.20564	0.0910172	4.99018
TCGA-DD-A1EE-01A-11R-A131-07	1.79124	8.12111	9.32245	5.70333	0.906954	6.58654	3.87851	8.80539	8.44107	1.76126	5.0044	5.56328	3.84458	7.79922	5.6336	10.6336	7.69918	4.35601	0.0761586	5.73794	5.83667	0	1.72354
TCGA-DD-A1EF-01A-11R-A131-07	2.13756	5.78653	9.04697	5.57848	0.833551	5.25148	2.14868	8.61753	9.23623	2.03044	4.25269	5.56468	3.40324	7.24705	4.93167	11.2943	7.73644	4.73657	0.657698	6.1063	7.42989	0.249949	8.31121
TCGA-DD-A1EG-01A-11R-A213-07	1.17832	6.61449	9.27704	5.38703	1.85673	5.10241	4.52259	10.2407	9.24725	1.57903	4.52752	5.87474	5.80133	6.96366	5.415	11.143	6.37407	3.51965	0.0834889	5.6221	4.30222	0.0846045	7.229
TCGA-DD-A1EH-01A-11R-A131-07	1.78817	7.64503	10.0232	4.70127	0.454615	5.88304	0.322752	9.82633	8.53688	1.8153	3.67035	6.1933	4.21669	7.40227	5.78605	10.1953	8.59022	5.13115	1.71447	5.77447	5.89785	0.133128	8.61737
TCGA-DD-A1EI-01A-11R-A131-07	1.57678	5.50114	9.37861	5.50336	1.84539	5.23677	6.57192	9.90467	8.22896	2.7304	4.93594	6.55975	5.47074	8.1792	4.47403	11.2347	7.81572	4.78491	1.23626	5.24945	5.10838	0.0861663	7.77714
TCGA-DD-A1EJ-01A-11R-A155-07	1.06881	6.22997	10.1742	4.68727	2.97756	5.51344	3.97697	9.73048	9.81602	3.36352	4.76703	6.75615	4.38578	7.93599	5.04247	10.7201	8.67931	5.30921	0.0614295	4.88595	5.87327	0.103107	8.08084
TCGA-DD-A1EK-01A-11R-A213-07	0.732325	6.77036	8.80852	3.75358	1.23771	4.9526	3.59392	8.40914	9.04597	0.792368	4.55082	4.83385	3.23757	5.66003	4.43742	9.18257	6.99323	4.31814	1.62601	5.38348	4.42726	0.47823	4.47552
TCGA-DD-A1EL-01A-11R-A155-07	1.49094	7.46342	9.9711	5.28286	3.99371	5.86058	3.01296	9.00578	8.76624	2.5221	5.33101	6.74346	5.38292	8.44707	5.41293	11.0378	7.65251	3.57349	0.0816424	7.8352	6.24654	0.600299	7.60399
TCGA-DD-A39V-01A-11R-A213-07	0.922734	6.24748	9.42392	4.95491	2.24022	4.76173	3.41207	11.761	10.7473	0.633586	4.93223	4.18128	3.04309	8.249	2.1346	12.2911	6.73017	0.536321	0.0417453	5.75347	4.38224	0	4.62359
TCGA-DD-A39W-01A-11R-A213-07	1.56998	5.73816	9.14114	3.97042	5.46471	6.14956	6.09207	9.58417	8.55822	1.14063	4.57762	7.6929	1.91978	7.43154	3.37771	9.70304	8.8735	3.33945	0.322315	7.28629	6.06914	0.111219	4.98617
TCGA-DD-A39X-01A-11R-A213-07	2.33767	7.58038	8.77105	5.127	1.07379	4.66184	6.74767	10.5922	8.64132	0.718932	5.19079	5.03749	5.1068	7.21679	4.52322	12.7121	6.33099	1.13634	0.597133	3.08546	4.24639	0.118503	1.70413
TCGA-DD-A39Y-01A-11R-A213-07	1.37748	6.16611	9.48242	5.68715	3.46671	4.30489	4.13531	11.682	9.92054	2.25771	5.56457	7.24269	6.22046	6.56742	6.56663	12.6817	6.04233	1.98532	0.0421146	3.74937	4.51447	0.132372	1.64269
TCGA-DD-A39Z-01A-11R-A213-07	1.33602	5.73052	9.93332	4.45338	0.0876836	4.23969	2.78296	10.3493	9.84858	1.02261	5.63448	4.99516	2.10475	8.08453	4.02231	12.15	6.8217	1.70099	0.214803	3.45343	4.13333	0	7.35647
TCGA-DD-A3A1-01A-11R-A213-07	0.570172	7.22441	9.14571	4.63373	3.90164	5.09396	6.40251	10.5099	9.52863	0.988776	5.30422	7.02949	4.55591	7.31146	5.31631	10.6334	7.05433	1.69432	2.28673	3.73702	4.19943	0.13096	7.15695
TCGA-DD-A3A2-01A-11R-A213-07	0.595997	5.85805	8.00715	3.73882	0.0368216	3.59393	1.64946	6.61703	8.46091	0.445071	4.55252	5.2436	1.15663	7.95526	2.83543	9.1084	7.30433	2.53468	3.2965	5.15275	4.13221	0.0735733	1.71948
TCGA-DD-A3A3-01A-11R-A22L-07	0.84872	4.59389	9.52748	5.69414	0.655172	3.29675	4.57898	10.0727	9.39825	0.907522	4.43953	5.12968	1.49091	7.8924	2.31709	12.5785	6.30508	2.04172	0.0188129	3.16075	4.15394	0	7.2196
TCGA-DD-A3A4-01A-11R-A22L-07	0.837253	4.99378	9.51711	4.13689	1.53097	4.98449	10.3244	4.63198	8.55625	0.535963	4.51984	4.57709	0.959989	9.90749	5.11998	9.09522	7.85062	3.54285	5.54688	2.6143	4.10259	0.0217197	8.82845
TCGA-DD-A3A5-01A-11R-A22L-07	1.45664	8.37993	8.59995	4.18115	0.37655	4.77617	1.63846	10.1274	9.12495	1.88387	5.15137	6.23023	1.9464	7.90856	4.51852	9.65321	7.2118	2.89446	3.55055	5.06602	3.90619	0.585075	4.12922
TCGA-DD-A3A6-01A-11R-A22L-07	1.14619	7.98294	6.15813	2.77776	0.626914	2.77676	2.50236	11.6995	9.9165	0.306071	4.6137	4.19906	3.33928	8.45767	3.32401	10.0016	5.37401	0.336999	0.0473421	2.85638	5.39718	0.0760246	2.60285
TCGA-DD-A3A7-01A-11R-A22L-07	0.974079	5.52864	7.7665	3.6822	2.21696	3.38459	3.83301	11.3622	10.459	0.761392	4.57687	3.19425	4.98472	6.85353	4.38686	12.1086	5.2431	0.0753119	0.514021	2.61013	4.71932	0.0526838	6.57823
TCGA-DD-A3A8-01A-11R-A22L-07	0.92616	5.79083	8.63657	5.02994	2.00003	5.16618	3.28453	8.76988	9.13778	0.665018	4.28438	5.36786	1.9909	8.20691	3.27075	10.1608	7.48724	2.80451	0.051397	7.40552	4.92127	0.0824669	0.982205
TCGA-DD-A3A9-01A-11R-A266-07	1.39165	7.4631	9.19727	3.61406	0.21925	4.72805	3.7155	9.74391	9.73031	0.850426	3.96385	5.15925	4.56388	8.09788	3.90272	10.5967	6.81582	2.58245	0	1.13515	5.06867	4.67887	7.33204
TCGA-DD-A4NA-01A-11R-A266-07	2.33243	6.59185	9.37954	4.80756	1.85703	5.90219	1.85283	8.87261	9.33591	2.0143	5.47187	5.07363	4.53845	8.82295	7.2025	9.14415	7.73864	4.54477	0.152268	1.3651	7.30871	0.936636	7.73831
TCGA-DD-A4NB-01A-12R-A266-07	1.11546	6.99263	8.92483	4.70442	1.97773	4.97689	6.4406	8.22691	8.44226	1.00577	5.01493	5.11967	3.56694	9.53165	4.29262	9.34556	7.39345	3.98299	4.68596	2.2387	5.21283	0.107727	3.14155
TCGA-DD-A4ND-01A-11R-A266-07	1.36945	7.74918	8.97061	4.15509	0.703432	4.97055	7.22639	9.36891	8.36974	2.03842	4.94103	5.62561	3.65582	8.23919	5.6856	9.70372	7.85646	5.90468	3.94663	5.59563	5.82808	0.220153	8.51778
TCGA-DD-A4NE-01A-11R-A27V-07	0.738205	8.93341	8.85243	4.7786	0.349924	5.8994	1.95163	8.2358	8.05671	1.89745	5.21115	5.94971	3.65011	7.88896	5.97638	9.40285	7.71254	3.93323	0.930341	5.60687	5.20927	0.155002	5.49503
TCGA-DD-A4NF-01A-11R-A27V-07	1.61884	7.00713	8.22554	5.35471	5.99525	6.61613	3.8591	7.02664	8.36926	0.466713	5.01373	5.85068	1.95054	9.10734	4.54112	9.02903	7.52521	3.40678	0.0366918	7.13732	5.55621	0.0224289	2.64103
TCGA-DD-A4NG-01A-11R-A27V-07	0.556896	5.10473	8.03464	4.8122	1.32428	4.24982	2.96222	9.28418	8.46532	0.710159	4.41074	4.25892	2.78302	8.71009	5.0651	9.91521	7.43119	4.08409	0.0400875	4.98043	4.56326	0.0486221	6.85184
TCGA-DD-A4NH-01A-11R-A27V-07	2.17017	8.57731	10.1838	4.68989	1.56532	5.70133	2.04308	9.42179	8.69217	2.46423	5.33876	5.25164	5.81146	8.82726	5.98893	9.5323	7.60965	3.25448	0.412413	5.72234	5.90978	0.0239978	7.91852
TCGA-DD-A4NI-01A-11R-A27V-07	0.660546	6.16085	8.35312	4.20051	0.0466617	5.08174	3.68219	7.54367	8.1675	0.644729	4.2996	3.81385	2.15957	8.04592	4.1137	8.73146	7.26211	2.91001	3.16666	6.86604	4.6557	0.168883	5.17838
TCGA-DD-A4NJ-01A-11R-A27V-07	1.43041	8.40506	9.07261	5.25742	0.245129	4.63549	3.04685	9.29823	8.29833	2.95778	4.74867	5.14313	3.91639	7.43709	6.2888	10.2047	7.26027	3.74006	3.5508	4.31729	5.07767	0.505686	6.12352
TCGA-DD-A4NK-01A-11R-A28V-07	1.56539	7.67989	9.01422	4.32558	0.0773088	4.88674	9.29818	9.77462	8.45767	0.651093	4.04502	5.22945	1.89098	8.14707	5.01059	9.24419	6.99113	3.29126	4.79019	4.82394	5.10951	0.447782	1.17624
TCGA-DD-A4NL-01A-11R-A28V-07	0.735714	7.53717	8.71241	3.60828	0.0254777	5.12456	11.7326	7.93779	7.70295	0.544071	3.82704	6.23508	2.10457	8.1629	3.04914	8.61954	6.94946	4.06275	2.69548	4.76668	4.23785	0.0240749	7.29085
TCGA-DD-A4NN-01A-11R-A28V-07	2.52518	7.10297	9.82844	4.54431	0.0534085	4.9232	0.429136	10.0283	9.37889	2.30046	4.11091	6.31317	3.17997	6.69802	3.83419	10.8895	7.5444	3.97305	0.202367	5.7096	5.76985	0.417751	7.30956
TCGA-DD-A4NO-01A-11R-A28V-07	1.47029	6.64931	9.60392	5.19979	0.338974	5.52004	3.79281	8.96247	9.09307	0.809779	4.83562	5.50228	4.26748	8.81378	4.44594	9.93239	7.10745	3.29835	2.57843	6.08583	4.58917	0.675635	8.94608
TCGA-DD-A4NP-01A-11R-A28V-07	0.8156	5.03253	8.56528	4.01224	3.1923	5.37317	7.40338	7.55878	8.22269	0.264938	4.64013	5.26453	1.45447	8.45012	2.30193	9.05752	7.09087	2.57455	0.0437372	5.5628	4.0694	0.026761	1.66482
TCGA-DD-A4NQ-01A-21R-A28V-07	1.84123	7.38323	9.78578	4.84082	3.31137	4.93647	8.02918	8.95587	7.54189	2.41166	5.94603	6.51067	4.91102	8.37864	6.18828	10.0752	7.34217	4.89714	0.633606	5.54023	5.86128	0.0829626	7.19285
TCGA-DD-A4NR-01A-11R-A311-07	1.55057	7.66715	9.17956	4.11879	2.47266	4.67996	5.11455	9.5481	9.03664	2.5149	4.70869	5.65656	5.36821	8.79923	5.84048	10.3331	6.88071	4.92252	1.87163	5.11396	5.58888	0.210453	8.5172
TCGA-DD-A4NS-01A-11R-A311-07	1.61048	7.10784	8.59509	4.84619	1.28821	6.00287	7.62359	9.59214	8.57511	1.22093	4.24171	5.51723	4.5282	8.4908	4.7329	10.0038	7.58383	3.79044	1.99219	5.79256	5.44549	0.394344	4.50306
TCGA-DD-A4NV-01A-11R-A311-07	1.12954	7.10152	10.4505	4.34965	0.326762	5.04657	8.45038	8.46329	9.24773	1.32095	4.61851	5.43926	2.56083	7.96158	5.4934	9.34793	7.63759	3.7297	3.91901	4.29275	4.73029	0.230029	7.33432
TCGA-DD-A73A-01A-12R-A32O-07	1.19322	6.41613	8.82367	4.08449	1.34728	4.65752	6.40167	8.26495	8.1688	0.811685	4.04982	5.02651	3.00445	7.86799	4.90395	9.96243	7.20689	3.13523	3.91426	3.91831	3.94785	0.114035	8.15259
TCGA-DD-A73B-01A-12R-A32O-07	1.22595	8.78388	9.24274	4.00183	0.0442276	4.11566	1.69175	9.37074	9.13721	1.93975	5.79011	5.22133	1.33288	7.93343	3.66286	9.01186	7.68071	4.47703	4.88143	5.77146	4.69624	0.187276	1.82683
TCGA-DD-A73C-01A-12R-A33J-07	0.90432	6.13756	9.94618	4.85161	0.0663595	4.82841	1.04218	6.59157	9.20066	1.07321	5.1707	6.03909	1.93632	8.70333	2.2144	9.34631	8.48051	4.83796	4.21164	2.54261	5.26931	0.502626	2.36924
TCGA-DD-A73D-01A-12R-A32O-07	1.42192	3.8554	8.00227	4.75099	0.0277681	5.93396	4.38757	7.47829	8.72512	0.550147	4.36916	4.54082	1.33277	7.95724	4.57344	9.92843	6.79484	2.75957	0.0481638	7.51846	4.20095	0	4.57542
TCGA-DD-A73E-01A-12R-A32O-07	1.62146	7.97741	9.42202	4.68055	1.75397	6.34939	8.24688	9.7564	8.28272	1.48902	4.57215	6.08637	1.93195	7.89471	5.97481	10.0734	7.6756	3.25232	0.290576	7.88346	5.76467	0.029813	3.29562
TCGA-DD-A73F-01A-11R-A32O-07	0.661322	8.0722	9.3492	3.82931	2.10074	4.91414	10.2067	9.39288	8.48627	1.92691	4.76817	6.03695	4.74248	7.41618	5.07767	8.97625	7.96464	3.24959	4.82544	5.91774	4.53283	0.155756	7.04524
TCGA-DD-A73G-01A-22R-A32O-07	1.40668	6.39873	8.96536	3.19737	0.308273	1.85577	1.2857	10.3134	10.3276	1.0293	5.27855	4.57814	4.99314	7.98817	5.03963	11.8397	5.70254	0.913221	0.446106	2.1733	5.08297	0.0392097	5.12464
TCGA-DD-AA3A-01A-11R-A37K-07	2.54729	8.50804	10.5469	5.10304	2.30799	6.27719	6.43149	11.1377	9.73203	3.35646	4.6008	5.22645	6.62288	7.32161	5.21459	11.357	6.62263	2.48658	0.499465	1.25406	6.72301	0.138358	3.65876
TCGA-DD-AAC8-01A-11R-A41C-07	1.68884	7.18398	9.87102	5.68689	4.23776	5.58162	0.408748	10.1642	9.66553	1.02401	4.3298	7.79679	3.70845	8.23648	3.91662	11.4509	8.07473	2.31533	0.0628002	6.18386	5.6277	0.0257961	5.51344
TCGA-DD-AAC9-01A-11R-A41C-07	0.469162	5.98319	8.99282	4.07838	0.939642	4.2566	15.484	8.88008	8.44914	0.458148	4.3841	6.767	3.02033	8.47585	3.7231	9.52518	6.3031	2.71225	2.86224	3.84457	4.21402	0.0887451	5.05171
TCGA-DD-AACA-01A-11R-A41C-07	1.43121	4.90147	7.97759	5.05929	0.677688	5.87263	6.83796	9.62737	9.00909	1.87405	4.67447	6.86704	1.94496	8.34683	4.22486	11.3164	9.11912	3.8622	0.540172	8.03043	5.89983	0.0585734	2.36817
TCGA-DD-AACA-02A-11R-A41C-07	1.81828	5.16673	8.35367	4.38293	0.870206	5.97965	5.21388	9.79895	8.91879	1.7136	4.63199	6.42362	1.87013	8.84591	4.06768	10.3315	8.89782	4.508	1.77546	6.65271	5.53948	0	6.12932
TCGA-DD-AACA-02B-11R-A41C-07	1.32186	4.12253	8.31302	4.01951	0.941297	5.31805	3.80859	10.7531	9.6612	1.87045	4.90744	6.70259	1.50698	9.03553	2.59698	10.8933	8.41882	3.44464	0.400441	5.91186	5.46619	0.018595	7.16267
TCGA-DD-AACB-01A-11R-A41C-07	1.29335	3.91688	9.44666	5.50782	3.41359	4.2565	4.19111	9.85049	9.40154	1.5854	5.0954	6.04916	5.50467	8.32015	3.70287	12.401	7.66261	2.28303	0.0898472	6.74333	5.82762	0.0371104	6.23888
TCGA-DD-AACC-01A-11R-A41C-07	1.44541	6.0868	9.53882	4.03697	0.145984	4.58733	7.53482	9.07456	8.327	1.72183	4.16336	5.69288	4.13011	8.52196	3.55075	9.52548	6.99356	3.12823	0.789569	4.21486	4.08768	0.154641	8.04377
TCGA-DD-AACD-01A-11R-A41C-07	0.99989	5.97808	9.21212	4.81119	0.724092	3.73379	10.0546	10.4507	8.6312	0.579065	4.49055	4.68943	2.96455	9.18912	2.43879	11.9659	6.05959	0.227239	0.0186011	3.34508	3.74299	0.0883389	3.99495
TCGA-DD-AACE-01A-11R-A41C-07	0.823667	7.07487	8.03782	3.58487	0.562196	4.03497	4.94219	7.2937	8.65355	0.709774	4.05108	5.52169	2.04571	6.47863	5.39831	8.97478	6.91802	2.65046	0.112647	5.73334	3.03655	0	4.71138
TCGA-DD-AACF-01A-11R-A41C-07	1.34822	6.54767	10.3149	4.89804	0.045382	4.4071	0.752691	8.9485	8.5401	2.05154	4.81416	4.96155	2.5912	9.1163	5.47537	10.0287	6.65705	2.88822	0.616756	4.14953	4.10101	0.104947	1.11712
TCGA-DD-AACG-01A-11R-A41C-07	2.07699	3.51054	8.96748	4.47662	0.107905	3.3383	10.3917	9.48868	8.67347	2.5848	5.18564	5.2712	4.50302	8.1376	4.71798	11.2986	6.33992	0.720126	0	5.15406	4.68135	0.17423	5.61615
TCGA-DD-AACH-01A-11R-A41C-07	1.31418	8.24679	9.78786	5.52458	3.97007	5.95799	5.76963	9.98934	8.45996	2.92321	4.39431	6.04945	5.75869	7.53404	5.90872	10.3959	6.76345	3.50504	1.43465	6.28839	5.43188	0.179192	6.67064
TCGA-DD-AACI-01A-11R-A41C-07	1.41811	6.42675	9.28653	4.96334	1.18071	3.48568	6.67258	10.8705	9.18858	0.82381	4.83508	6.10117	4.79777	8.76856	3.29458	11.3994	5.2866	0.750793	0.0665537	3.09963	4.36175	0.156873	6.52861
TCGA-DD-AACJ-01A-11R-A41C-07	0.16627	4.33569	8.51979	5.17367	0.0958631	4.45976	1.6534	9.25319	9.19159	0.262578	5.19889	5.59728	1.64217	7.10066	3.59102	11.6439	6.79559	2.16115	0.383835	5.17877	4.71158	0.0133122	5.32591
TCGA-DD-AACK-01A-11R-A41C-07	1.22745	6.44676	9.63896	4.3653	4.2259	5.40075	9.51443	8.51637	8.57783	1.4965	4.89507	8.02483	2.72841	8.59672	5.39058	9.99105	8.49439	4.62228	1.9535	5.11767	5.7428	0.0419372	9.44186
TCGA-DD-AACL-01A-11R-A41C-07	1.33605	3.84978	9.8604	3.69603	0.43769	3.79247	8.70328	10.421	8.2794	2.28061	5.06953	6.42812	5.08899	8.77047	4.51225	11.412	6.8392	3.68541	0.71091	4.20111	5.69499	0.264059	6.81861
TCGA-DD-AACN-01A-11R-A41C-07	2.00078	7.86335	9.47003	5.31373	0.0728268	5.7437	9.03359	9.51576	8.40862	1.33583	4.19607	5.07793	3.79142	7.96514	4.11792	11.6697	7.80097	3.73554	1.08392	5.99535	5.61125	0.2745	7.83988
TCGA-DD-AACO-01A-11R-A41C-07	1.28365	6.75234	7.8068	3.25373	0.0124884	2.52112	4.85554	9.73557	7.721	1.11837	5.08452	5.33151	2.25547	8.09542	4.55505	10.6014	4.89029	0.475526	0.313818	3.55632	3.90831	0.400796	5.56413
TCGA-DD-AACP-01A-11R-A41C-07	1.49584	6.58524	9.73486	4.38613	2.11544	4.96769	6.11183	9.94576	9.06518	3.3628	4.64499	6.6937	6.43926	7.7267	5.02591	11.8161	7.57649	3.44294	0.234881	5.30461	5.56432	0.209678	5.8599
TCGA-DD-AACQ-01A-11R-A41C-07	0.857197	8.41648	8.5972	3.6507	0.802599	4.27951	0.154798	8.59207	8.11763	1.17784	2.92334	5.07682	3.80629	7.83082	5.51119	9.97789	6.20019	3.47184	1.26617	4.21555	4.37696	0.0702676	7.4194
TCGA-DD-AACS-01A-11R-A41C-07	1.15269	7.58752	8.83833	4.8943	0.129669	5.26228	1.77348	9.83663	9.02778	2.52155	5.0008	5.0358	4.05768	7.76741	6.63914	9.78455	7.44333	5.3812	2.42193	6.37084	4.87182	1.60964	8.63746
TCGA-DD-AACT-01A-11R-A41C-07	0.604898	7.01168	9.81308	4.83459	0.415066	4.52566	5.42824	8.25712	8.97781	0.632016	4.05076	5.94106	2.42099	7.48387	2.76691	10.034	6.74903	3.6892	0.143948	4.62734	4.63354	0.106462	6.58108
TCGA-DD-AACU-01A-11R-A41C-07	1.1619	6.38341	8.91298	4.75696	0.424915	5.83006	2.70646	10.5869	9.10892	1.60088	4.31526	6.78264	2.97847	7.99056	4.39607	10.4127	7.89538	4.32487	3.33229	8.05435	6.00389	0.274182	8.33679
TCGA-DD-AACV-01A-11R-A41C-07	1.06891	7.61405	7.86134	4.17981	0.216882	5.88402	7.78361	10.5202	9.21382	3.86146	3.73431	7.36386	1.55844	7.35439	4.89095	9.90353	6.13056	4.18737	3.82662	5.37771	4.35133	1.00491	4.10449
TCGA-DD-AACW-01A-11R-A41C-07	1.89476	2.76092	8.979	4.63448	0.0798442	5.41082	6.49109	8.5151	7.92496	1.98905	5.19977	6.93382	2.23735	7.74539	4.79495	10.7571	8.34907	4.93457	1.82687	5.3431	5.10976	0.123764	8.60702
TCGA-DD-AACX-01A-11R-A41C-07	0.990686	4.49849	8.45887	4.30763	0.93318	5.1848	5.84738	7.49957	8.94126	1.76486	4.65874	5.40371	3.5483	8.8091	3.88995	10.18	7.91196	3.35756	0.0693764	6.23624	5.87879	0	1.77601
TCGA-DD-AACY-01A-11R-A41C-07	0.236441	6.2245	10.1433	5.46464	0.379617	4.8189	0.346685	8.99057	8.65339	0.416145	4.06993	5.0043	3.79554	7.59811	4.19174	11.3976	6.43557	2.73299	4.24185	4.28809	4.60064	0.442647	4.03165
TCGA-DD-AACZ-01A-11R-A41C-07	0.881459	5.28979	9.60397	5.81052	2.17062	5.28344	3.99671	9.41592	8.48648	2.73446	6.10806	6.08104	5.77673	8.72805	6.19897	11.0682	8.02224	6.63686	0.0932247	5.4335	5.63528	0.351735	9.77103
TCGA-DD-AAD0-01A-11R-A41C-07	0.820405	6.6046	9.31268	4.34648	0.0257339	5.84712	1.76197	10.4401	9.25631	1.93795	3.70601	4.56964	1.43393	7.71346	4.82788	10.014	8.58566	3.96773	0.152875	7.36862	6.3151	0.14011	0.690053
TCGA-DD-AAD1-01A-11R-A41C-07	1.5526	7.08577	9.58335	5.52942	1.38144	5.85436	2.79846	9.58718	8.21852	1.93804	4.2364	6.74498	4.80508	8.07329	4.78836	11.2002	7.37252	5.15225	0.802459	6.01768	5.51411	0.183678	7.8932
TCGA-DD-AAD2-01A-11R-A41C-07	0.580094	6.46634	9.56188	5.21478	0.219558	4.64022	4.33063	9.41315	8.40975	1.51498	4.41994	5.23054	3.42683	8.20103	5.16789	10.9042	6.7916	4.07307	3.46938	4.35208	5.0366	0.199365	7.41377
TCGA-DD-AAD3-01A-11R-A41C-07	0.710327	7.08007	8.46101	4.23813	0.158451	5.29011	2.07372	8.54903	9.04932	1.18245	4.13244	4.71647	2.54154	7.49238	4.34492	9.78303	7.30877	3.93555	1.94075	5.77533	4.53132	0.219666	7.80471
TCGA-DD-AAD5-01A-11R-A41C-07	0.979159	5.27441	9.15078	6.17222	3.48873	5.28349	5.17983	10.5763	8.54093	2.49001	4.90112	5.20424	6.9777	8.13128	5.704	10.5497	5.82081	2.34116	0.118942	4.87666	5.32759	0.0424621	5.16438
TCGA-DD-AAD6-01A-11R-A41C-07	1.00328	6.03103	8.7854	4.19273	1.54435	4.97457	9.38186	8.61005	7.50218	2.9677	3.79569	6.06075	1.25874	7.54097	4.38808	10.9474	7.08906	2.9286	0.0529145	4.92464	4.46963	0	6.68206
TCGA-DD-AAD8-01A-11R-A41C-07	1.7271	7.19687	8.59361	3.23465	1.60776	5.69204	2.01766	9.14729	9.31655	2.53958	3.22783	3.56286	4.53816	7.6562	4.02193	9.08844	5.48432	2.26266	1.92403	4.37744	4.15383	0.7589	7.41746
TCGA-DD-AADA-01A-11R-A41C-07	1.9341	7.36959	9.3424	4.32255	0.259743	4.44174	0.59203	8.89988	7.84737	0.659101	1.43198	3.88464	3.71524	7.42076	2.73356	10.6572	6.54359	2.44079	0.545435	2.12171	4.00141	0.0200199	7.96584
TCGA-DD-AADB-01A-11R-A41C-07	1.65308	3.52793	10.1765	4.94909	0.575227	5.58327	6.07652	9.77045	8.34107	2.56642	5.15914	6.28532	5.74382	8.0356	4.97817	11.0732	7.73114	5.97329	0.402926	5.891	6.03819	0.156159	8.29707
TCGA-DD-AADC-01A-11R-A41C-07	2.09699	5.1897	9.80086	5.89376	2.81125	5.3602	8.24699	10.481	9.22192	3.32504	4.90759	6.50439	3.28164	7.70707	5.24765	10.7514	8.08708	4.05839	0.595079	6.38855	4.80651	0.142108	6.62545
TCGA-DD-AADD-01A-11R-A41C-07	1.76564	3.1686	8.92862	4.85415	0.889104	5.15262	7.99414	10.0184	8.97901	2.80769	5.02209	7.15705	1.88606	6.42866	4.26625	11.1413	8.09201	5.19705	0.381526	6.94189	6.43974	0.0292181	7.7013
TCGA-DD-AADF-01A-11R-A41C-07	1.12857	8.62308	9.92163	3.81928	0.183086	4.03728	1.56017	8.57032	9.82295	1.21472	4.55525	5.29032	1.73742	7.8952	3.97637	10.0026	6.07759	1.96557	2.72735	3.39724	3.44937	0.14711	4.621
TCGA-DD-AADG-01A-11R-A41C-07	1.56957	6.62242	8.78242	4.28536	2.68385	5.28313	4.92893	8.61087	9.04406	0.852293	4.43699	5.3978	1.66885	7.86385	3.61651	9.34509	7.55612	2.92506	0.0528536	7.17191	5.34339	0	1.55731
TCGA-DD-AADI-01A-11R-A41C-07	2.01394	6.35346	9.64711	5.20382	0.0774465	4.07438	0.437874	10.4543	9.07106	1.13121	4.22754	4.6962	3.63622	7.40546	3.55337	11.7888	7.23039	1.68224	0.0229802	5.19065	5.0502	0.303799	6.32899
TCGA-DD-AADJ-01A-11R-A41C-07	0.658413	5.82433	9.30589	3.89316	0.0901794	3.64426	4.62567	9.84233	8.79874	1.04569	4.85887	5.95434	2.28058	8.43804	4.59952	10.319	6.75535	3.58339	1.44327	4.31915	4.84925	0.0574352	7.01643
TCGA-DD-AADK-01A-11R-A41C-07	1.01158	7.17256	9.27401	4.88184	0.4488	3.98494	1.30107	10.0887	8.38806	1.14833	4.24233	5.72699	4.36961	8.13948	3.94463	10.7797	6.09092	2.73315	0.908515	3.7652	4.42177	0.310191	6.14209
TCGA-DD-AADL-01A-11R-A41C-07	1.02447	7.20717	8.44548	4.87139	1.07315	5.242	9.07623	8.85613	8.94483	2.43429	5.31987	6.73384	4.04446	7.23349	5.41646	9.68139	7.71851	3.92925	3.21159	6.16	4.82246	0.540541	3.81199
TCGA-DD-AADM-01A-11R-A41C-07	0.658539	6.12872	9.33179	5.18512	0.96342	3.90504	3.5492	10.2467	9.52514	0.951474	4.9244	5.34371	2.97715	7.96039	4.46592	10.8441	5.86704	1.17865	1.53693	4.27371	3.96502	0.164746	4.85972
TCGA-DD-AADN-01A-11R-A41C-07	0.572444	2.78522	9.70096	3.47715	2.70112	3.20775	5.5926	10.8519	9.28159	2.15741	4.783	5.2147	5.66527	7.08047	3.85393	13.9726	5.82652	0.442427	0.0860028	1.24555	3.592	0	6.70995
TCGA-DD-AADO-01A-11R-A41C-07	1.57919	5.92977	8.34174	3.60998	0.525515	2.81617	2.26018	10.2753	9.15485	1.41122	5.493	6.94366	4.7323	6.92346	4.67043	12.6266	6.15051	0.336336	0	4.70463	4.69351	0.0850694	7.55865
TCGA-DD-AADP-01A-11R-A39D-07	0.887713	5.40083	9.77459	4.85804	0.196952	5.34816	5.60772	9.10048	9.13081	1.63627	4.69517	5.58783	2.35199	8.15101	5.28598	11.2556	7.30786	4.97941	4.53909	4.95431	4.71197	0.705489	7.47163
TCGA-DD-AADQ-01A-11R-A41C-07	1.37539	6.30965	10.6055	5.48093	0.296799	4.6745	11.046	9.60766	8.41928	0.774996	4.20869	4.0331	1.93549	7.86101	3.56287	10.7376	6.68106	2.17234	0.225617	3.1205	4.66772	0	6.60806
TCGA-DD-AADR-01A-11R-A41C-07	1.07682	5.5407	8.33224	5.13776	1.233	4.37402	7.59621	9.44575	8.7382	1.89502	4.66671	5.92758	2.84131	7.61897	4.61972	10.346	6.95506	2.76597	2.77201	5.28123	4.06972	0.111107	5.02629
TCGA-DD-AADS-01A-11R-A41C-07	1.12483	6.96757	6.82152	2.51945	0.0083943	2.65314	11.123	9.63685	9.56338	0.320269	5.15193	4.63054	2.24791	8.81277	2.47138	10.2397	5.3087	0.115542	0.392435	4.58973	3.36968	0	0.452588
TCGA-DD-AADU-01A-11R-A41C-07	0.744212	5.21737	8.29874	4.84422	1.55331	4.81011	10.2901	9.71948	8.53657	0.331245	3.99456	6.68857	1.31111	7.07141	3.50194	10.751	7.44373	1.17219	0.155124	7.72174	3.37832	0.0585639	0.846976
TCGA-DD-AADV-01A-11R-A39D-07	1.70493	6.30449	8.15369	4.51108	0.933544	5.53975	8.94706	9.2143	9.26041	3.13572	4.67088	5.68971	2.76498	7.47764	4.22524	9.79807	7.2726	4.18	4.25867	5.23244	4.50411	0.517805	5.35398
TCGA-DD-AADW-01A-11R-A39D-07	2.01086	8.33912	9.76113	4.3966	0.910389	5.63741	3.15241	9.0823	9.27435	2.75649	3.99549	7.23725	2.93754	7.64345	6.21196	9.84898	7.72073	3.85038	1.13944	5.50581	6.16204	0.100905	7.77766
TCGA-DD-AADY-01A-11R-A41C-07	1.63231	6.73743	11.0455	5.18459	0.212276	6.50116	1.06157	8.37032	9.17131	1.42817	3.20805	6.02002	3.87214	8.42312	7.1515	10.3842	7.8134	5.49962	3.74207	5.50914	4.90419	0.442877	6.23873
TCGA-DD-AAE0-01A-11R-A41C-07	1.90068	5.084	9.2038	5.15954	0.212926	4.1701	6.9001	9.7186	9.1973	2.50514	4.05474	4.86791	7.41429	7.18569	5.25282	12.1238	6.61753	2.17376	0.047782	4.57122	5.36107	0.0579221	5.6011
TCGA-DD-AAE1-01A-11R-A41C-07	1.57178	6.39236	9.00487	4.52444	0.0678771	4.92637	4.76534	10.3469	8.40049	1.32954	4.2676	6.40304	1.89884	7.33817	3.12528	10.9411	7.8448	4.0586	1.67625	5.46422	4.98024	0.303333	8.07083
TCGA-DD-AAE2-01A-11R-A41C-07	0.647172	7.71079	9.53856	4.01852	0.128389	4.94428	10.6855	7.79254	8.67298	1.36761	3.63475	6.11121	2.83645	8.2479	5.02435	9.63776	7.97428	4.82229	4.34524	4.91319	5.52432	0.161786	7.14881
TCGA-DD-AAE3-01A-11R-A41C-07	0.612338	6.11204	8.37301	4.45237	0.0280832	4.69381	10.1477	10.6489	10.2757	0.388757	4.71361	5.83268	2.92605	9.0057	3.43503	10.0668	7.26976	0.806519	1.78314	6.59951	3.8145	0.199777	2.18474
TCGA-DD-AAE4-01A-11R-A41C-07	1.07014	6.2508	8.42528	3.61483	0.248498	3.31241	2.70603	8.701	8.85416	1.44133	5.27807	4.93833	3.02011	8.78344	3.01669	9.99746	6.32113	0.439666	1.16044	3.05147	3.62736	0.155916	2.71623
TCGA-DD-AAE6-01A-11R-A41C-07	1.13401	3.27218	8.36414	3.1969	0.0141692	3.53848	5.40307	10.1202	7.89721	2.14221	4.60823	4.88896	1.73484	5.86295	4.60578	10.1166	6.65573	3.28447	3.72696	3.6436	5.12001	0.0200329	6.33519
TCGA-DD-AAE7-01A-11R-A41C-07	0.783709	6.80297	8.75727	4.39705	0.358309	4.63504	14.8453	8.25345	8.44314	0.790984	3.65869	4.47583	3.00236	8.39463	3.64584	9.43398	6.64916	2.74434	3.36969	3.66735	3.66148	0.137308	5.59637
TCGA-DD-AAE9-01A-11R-A41C-07	1.16579	7.05503	9.4517	4.87633	3.44015	4.28946	3.53593	11.1453	9.15404	1.21024	5.08838	4.79094	1.19196	8.34148	2.60497	10.7255	7.16297	2.4526	0	7.05585	4.83537	0	5.30463
TCGA-DD-AAEA-01A-11R-A41C-07	1.58382	5.41587	7.52534	3.38839	0.0269382	4.10478	5.69428	10.1963	8.87625	1.59872	4.37327	6.05955	1.64512	7.26341	3.82265	9.03897	6.44794	2.32227	1.97864	6.52557	4.85148	0.247212	5.53991
TCGA-DD-AAEB-01A-11R-A41C-07	0.748323	4.25528	7.18714	3.3213	0.441136	3.34604	9.23597	9.23924	8.54728	0.285402	3.46922	4.36635	1.84332	7.60004	1.95758	10.1102	5.83599	0.0485484	0.0186581	5.5514	3.6016	0.0226661	0.784605
TCGA-DD-AAED-01A-12R-A41C-07	1.63439	4.26869	7.07366	4.32314	0.558411	4.49029	14.0087	10.2652	8.79149	1.58262	3.6914	5.33183	4.94625	8.94815	4.32284	11.455	6.52355	0.791529	0.693454	4.75892	4.40063	0.0573909	9.07745
TCGA-DD-AAEE-01A-11R-A41C-07	1.52341	3.82819	8.44992	4.76195	2.71187	4.02052	6.88279	10.3902	9.91219	1.3699	4.95201	5.49869	1.5682	7.56781	3.9125	10.6105	7.93961	1.88981	1.98882	6.05221	4.70976	0.160639	3.66294
TCGA-DD-AAEG-01A-11R-A39D-07	1.72607	7.83105	10.0126	5.75967	1.09713	4.70062	2.15836	10.4134	7.98516	0.878767	4.87403	5.05422	4.58776	7.93996	5.35998	10.8151	7.07028	3.44828	2.50059	5.39701	5.75246	0.523984	4.21264
TCGA-DD-AAEH-01A-11R-A41C-07	0.700171	5.04247	8.5154	4.30132	0.0657405	5.42513	2.86698	8.64943	8.61741	0.868068	4.28929	4.49615	2.74456	8.77331	4.22023	10.1442	6.73078	1.88303	3.20989	5.59592	4.50039	0.0697539	4.06343
TCGA-DD-AAEI-01A-11R-A41C-07	0.120926	4.42493	8.3295	4.37214	1.43889	4.92009	2.83486	9.71481	9.25858	1.39814	4.56385	5.82999	2.42432	7.34132	4.90493	11.1991	6.91749	4.64478	3.28449	5.9452	4.75935	0.23426	3.2523
TCGA-DD-AAEK-01A-11R-A41C-07	1.16283	6.15858	8.38664	4.76184	0.53003	6.08906	6.48485	8.4705	9.11582	1.69215	4.78533	6.90295	3.14851	8.03326	4.1552	10.3546	8.97064	4.53417	0.636779	6.24115	5.12445	0.316666	5.89273
TCGA-DD-AAVP-01A-11R-A41C-07	1.06799	6.85611	9.63442	4.5267	3.65763	4.46994	5.22429	7.52447	8.98503	0.764453	4.97743	5.18488	1.91724	8.57185	4.04255	9.93024	6.95453	1.6862	0.0325252	7.20788	5.14298	0.255998	4.41454
TCGA-DD-AAVQ-01A-11R-A41C-07	1.83288	5.49864	9.5499	4.68916	0.204101	4.46174	1.32942	10.1832	8.72993	2.03701	3.35304	5.75728	3.9088	7.56087	3.21489	10.7966	6.84537	3.50931	0.3494	4.65225	4.97669	0.289528	8.37363
TCGA-DD-AAVR-01A-11R-A41C-07	1.25427	6.87171	9.72455	4.88898	0.473652	5.18881	2.6317	9.36021	8.66273	0.837869	3.41595	4.94942	3.73163	9.0814	4.54725	9.74788	6.66783	2.36647	1.95321	3.43133	4.48576	0.287148	7.3322
TCGA-DD-AAVS-01A-11R-A41C-07	1.71872	7.04571	9.41466	5.09025	0.216645	5.84949	5.22356	10.3306	8.65023	2.14134	4.49809	5.08488	2.39686	8.09434	5.62546	10.8832	7.68552	4.04739	3.12604	6.49842	5.76606	0.161535	7.68443
TCGA-DD-AAVU-01A-11R-A41C-07	1.41154	3.21389	9.25155	5.49225	0.790573	4.4797	2.12157	9.45055	10.0771	1.18069	5.14219	4.50682	4.05092	7.575	5.10739	12.5182	6.75797	2.25441	0.448083	6.01224	3.84388	0.27898	5.11975
TCGA-DD-AAVV-01A-11R-A41C-07	1.38967	6.43907	10.6734	5.56253	1.5719	4.90268	9.41644	10.4288	8.36841	1.17698	4.44505	6.07728	6.20041	8.41124	3.47113	10.7101	6.48677	4.14443	0.360057	4.08412	5.16383	0.1956	8.05386
TCGA-DD-AAVW-01A-11R-A41C-07	1.25036	6.79688	9.04813	5.55163	0.562193	5.15905	4.25765	9.98546	8.66545	1.77521	4.79527	7.27508	2.72115	7.6432	3.82291	9.43182	7.72203	3.22271	2.42288	5.44252	4.43559	0.45948	7.54171
TCGA-DD-AAVX-01A-11R-A41C-07	0.562737	4.1252	8.90006	5.17013	0.212183	5.64881	11.1469	10.2163	8.32243	0.427106	4.51917	5.66237	2.15046	8.33835	4.15839	10.3511	7.83834	3.69471	0.16737	6.02835	5.19296	0.03554	1.70035
TCGA-DD-AAVY-01A-11R-A41C-07	1.15304	6.41289	9.23989	5.02139	0.546871	5.81829	2.25458	8.85933	9.34761	0.602702	4.02791	5.63549	1.38244	7.26724	5.10311	10.9599	7.27558	3.24951	0.37048	6.74847	6.04829	0.0421976	1.47494
TCGA-DD-AAVZ-01A-11R-A41C-07	1.76061	6.4379	9.55822	5.32596	0.651936	4.90649	1.33342	9.42132	8.41523	1.72822	4.61978	5.6889	1.64562	7.98567	4.49573	10.9308	7.84851	5.10667	1.52666	5.91195	5.24599	0.10356	8.49149
TCGA-DD-AAW0-01A-11R-A41C-07	0.506106	7.3121	8.6619	4.82359	0.824513	5.85274	4.97905	9.4562	8.94787	1.23509	4.62694	5.16172	4.34705	7.53805	4.9851	10.2202	7.74792	3.77777	1.90782	6.51721	5.01271	0.806853	6.76471
TCGA-DD-AAW1-01A-11R-A41C-07	0.865024	5.80523	8.60903	5.0892	0.0732642	6.29118	4.95537	7.93292	8.79946	0.596929	4.39127	5.64856	1.59879	9.27225	4.4139	10.2138	8.36103	3.7214	0.0774516	7.12337	4.90361	0.0569388	1.85611
TCGA-DD-AAW2-01A-11R-A41C-07	1.29028	6.48568	8.13368	5.69439	0.373916	5.8002	7.38464	10.2877	8.88332	1.02259	3.98286	5.37557	1.70097	8.20111	4.26492	11.6396	7.0328	2.86755	0.186276	6.09325	5.71675	0.163188	1.40029
TCGA-DD-AAW3-01A-11R-A41C-07	1.58322	7.00651	9.00635	5.57078	0.387782	5.34157	5.92327	9.2763	8.79555	0.673242	4.74095	5.52753	1.9803	7.74637	4.42095	10.9233	7.25754	3.29467	0.0509031	4.61643	5.48691	0.149548	5.44389
TCGA-ED-A459-01A-11R-A266-07	0.152343	7.11451	9.59904	5.09902	1.37504	4.63666	6.88127	10.2411	8.05002	1.49364	4.74417	5.41112	5.96581	8.78729	5.04332	10.1758	6.89833	5.28318	0.139278	4.26408	5.07842	0.244822	1.38917
TCGA-ED-A4XI-01A-11R-A266-07	1.43674	6.51855	8.42477	3.93098	0.305942	5.22305	7.74089	8.31153	8.06916	0.778499	3.9568	5.71323	3.36326	8.07175	3.76128	9.13403	7.68731	4.14301	4.76968	4.70905	4.6804	0.101318	6.66562
TCGA-ED-A5KG-01A-11R-A27V-07	2.63872	7.11973	9.56762	5.29588	1.00639	6.25918	2.56759	9.67466	8.22827	3.2327	4.60053	5.70921	5.33999	8.42286	5.63489	10.8179	8.20174	3.88841	1.18593	5.65561	5.89109	1.48281	8.56275
TCGA-ED-A627-01A-12R-A311-07	1.16614	7.87782	8.66555	4.61374	0.141028	5.89187	10.7245	8.91214	8.29174	1.25331	4.69144	5.38083	4.13556	9.14777	4.0056	9.86314	7.78187	3.88129	1.41154	5.31014	5.04707	0.206695	4.49227
TCGA-ED-A66X-01A-11R-A311-07	1.52016	7.68912	9.12554	5.07723	0.638094	4.74037	1.93364	9.82966	8.70719	1.93365	4.71191	6.28332	4.57889	8.14247	4.80708	11.5743	7.97533	3.85313	0.522088	4.75738	5.95908	0.145466	9.46062
TCGA-ED-A66Y-01A-11R-A311-07	1.05687	7.51312	9.26659	4.75967	0.117855	5.65234	0.224544	9.24349	8.55378	1.8022	3.67851	4.39279	7.92963	6.13952	4.90121	10.7835	7.46777	5.10829	0.166079	4.21238	5.61764	0.176154	7.83062
TCGA-ED-A7PX-01A-51R-A352-07	2.16637	7.71261	10.1123	5.04034	1.87503	4.86544	3.9274	10.5455	8.50109	1.96472	4.74065	7.08536	5.36125	7.47428	5.88663	10.3101	6.91081	4.9203	0.323697	3.17381	6.71007	0.0758731	6.38771
TCGA-ED-A7PY-01A-11R-A33R-07	2.10561	5.02004	8.81962	4.15609	0.0216407	4.87727	0.82979	10.4663	8.59109	1.15485	3.83188	4.30556	1.74007	8.33784	3.91576	10.5423	7.61782	1.88126	1.50103	5.40883	4.05679	0.0305638	6.42828
TCGA-ED-A7PZ-01A-11R-A33R-07	2.74724	5.26887	8.82868	4.57391	0.40211	3.8821	5.39254	9.19685	9.69603	1.2756	5.94745	5.73442	2.69953	6.77421	4.26598	10.9431	7.52469	2.64769	0.213774	6.23279	5.49487	0.117703	5.09123
TCGA-ED-A7XO-01A-11R-A352-07	1.0581	7.35558	9.39031	3.97176	0.0577504	3.993	10.2036	9.819	10.1989	2.28658	4.36629	5.22245	3.154	8.22938	4.36481	10.2068	6.51905	3.05461	4.19354	5.80626	4.29297	0.622962	3.34913
TCGA-ED-A7XP-01A-11R-A352-07	2.0154	4.93395	9.64511	5.24236	2.0909	5.40405	15.3945	9.89484	9.23964	1.47413	4.83694	5.4085	3.32047	8.23084	4.23492	10.7762	7.60471	2.52403	2.40363	5.25822	5.18896	0.129324	7.21429
TCGA-ED-A82E-01A-11R-A352-07	2.20444	8.30885	9.35042	5.69563	0.536793	5.82651	5.03919	9.59359	8.72515	1.49676	5.60096	5.6241	3.50261	9.68271	6.32067	10.9418	7.95737	4.12833	0.131512	0.975668	7.35409	0.158473	5.19659
TCGA-ED-A8O5-01A-11R-A36F-07	1.64341	4.74088	9.41362	4.89009	0.503675	6.05264	1.6614	10.1484	7.98867	2.04166	4.51899	6.39562	2.85827	7.64003	4.75341	11.2679	8.09416	4.77176	1.1948	6.22954	6.14497	0.0650547	7.4042
TCGA-ED-A8O6-01A-11R-A36F-07	1.32229	5.37866	9.41083	5.38987	2.25577	4.79449	5.65127	9.63005	8.83273	1.69704	4.49003	6.0392	5.28258	7.25509	4.85854	12.6361	6.96777	4.59232	1.21283	3.82571	5.67684	0.0438092	7.70972
TCGA-ED-A97K-01A-21R-A38B-07	2.37609	7.37579	9.64158	5.20452	2.28105	6.10256	10.0192	8.79402	7.86725	2.60651	4.51965	6.83001	5.69987	9.88968	4.94005	10.7185	7.54081	4.13124	1.55896	4.73215	6.02429	0.0501056	5.31605
TCGA-EP-A12J-01A-11R-A131-07	1.87744	6.02449	8.34877	5.47378	0.0907482	6.77464	3.17234	9.42359	9.00512	1.13968	4.9986	5.96657	1.54442	7.6989	3.75706	10.3238	9.19465	4.17015	0.0640055	7.88177	6.37866	0.126942	1.4682
TCGA-EP-A26S-01A-11R-A16W-07	2.02373	6.92289	8.76	4.52875	0.365618	6.31125	2.85431	8.46952	8.74837	0.859681	4.41929	5.5336	2.19679	7.23929	3.07485	9.38307	8.02455	3.77877	0.226743	6.63011	5.71207	0.0464076	3.02623
TCGA-EP-A2KA-01A-11R-A180-07	0.747208	5.86257	9.73328	4.65389	1.25295	5.72119	1.86876	9.71412	8.53222	1.74463	4.55461	6.03878	5.0305	7.54512	4.21333	11.6742	6.2257	3.773	0.159835	4.53422	4.63289	0	6.06318
TCGA-EP-A2KB-01A-11R-A180-07	1.73667	4.34101	7.95766	4.41629	0.384934	5.37947	8.39503	8.58329	9.07805	1.4742	5.05088	6.00655	2.90523	7.49113	3.77058	11.0339	8.00847	4.52104	1.21097	5.54425	4.87186	0.0317015	7.50586
TCGA-EP-A2KC-01A-11R-A213-07	1.11495	6.23127	9.48319	5.52878	1.93956	5.90425	6.1886	9.78592	8.77188	1.3094	4.62526	5.26782	2.13995	7.99361	4.95606	11.3311	7.49013	3.28065	0.0794953	5.61617	5.0474	0.0774216	6.97898
TCGA-EP-A3JL-01A-11R-A213-07	1.43296	5.87676	9.29134	5.21971	0.562052	3.86622	6.23363	10.2409	9.21248	1.22058	4.24587	5.31902	4.12051	7.1616	3.03294	11.4307	5.823	2.64366	0.655638	4.94219	4.23844	0.13748	6.75837
TCGA-EP-A3RK-01A-11R-A22L-07	1.49128	6.50053	9.11105	5.35662	3.61654	5.49058	5.22914	10.339	9.28797	2.00785	5.11906	5.91131	4.83239	8.84482	3.84501	10.6759	6.82763	3.18865	0.109317	4.9044	5.24597	0.640252	6.13808
TCGA-ES-A2HS-01A-11R-A180-07	1.44986	5.81665	8.78211	3.46204	0.0136729	4.25688	1.56527	9.75969	9.8215	0.573208	5.30538	3.12503	1.76471	7.68271	3.07244	11.68	6.02016	1.03537	0.7165	3.36275	3.49188	0.0572374	1.76472
TCGA-ES-A2HT-01A-12R-A180-07	1.06017	7.56855	9.3729	3.74428	0.380327	3.65705	6.72842	9.76058	8.93798	0.194482	4.3136	3.94036	3.06534	9.09621	3.29422	10.7352	5.30601	1.65948	1.82604	3.88421	4.07283	0.0159251	8.14058
TCGA-FV-A23B-01A-11R-A16W-07	2.13319	6.91968	9.40832	4.18084	0.431689	5.71909	3.97044	8.5587	9.39053	1.72693	4.53419	5.86333	2.67187	7.7547	5.45973	9.57912	8.14852	5.2294	2.37086	6.231	5.03175	0.0854359	8.14885
TCGA-FV-A2QQ-01A-11R-A22L-07	1.24314	6.08148	8.77016	5.19572	1.3892	5.0507	5.04177	10.65	9.71	0.864904	4.50964	5.5262	4.3267	7.76408	4.85056	10.998	6.41925	3.10959	1.93115	4.40069	5.24891	0.288417	3.02912
TCGA-FV-A2QR-01A-11R-A213-07	0.912993	7.33518	10.143	4.27619	0.828224	5.2976	2.48463	9.96265	9.58372	1.23029	4.64574	5.57751	2.11508	7.34682	5.84645	9.52489	7.22719	3.40558	0.310215	6.63589	4.49098	0.310727	6.13681
TCGA-FV-A3I0-01A-11R-A22L-07	1.75255	8.50972	9.09009	5.34181	1.57563	5.52421	4.88917	10.9877	9.42632	1.19249	2.90392	4.01633	7.12057	10.306	6.07532	11.7902	6.52939	3.03875	0.439415	2.20045	7.37303	0	4.62722
TCGA-FV-A3I1-01A-11R-A22L-07	0.758075	6.15696	10.1148	4.84724	2.46416	5.43075	1.90615	10.4501	8.39109	2.05761	4.64576	5.96033	5.47668	7.28472	5.46939	10.6133	7.45221	4.49654	0.582766	5.3615	5.3528	0.119684	8.77071
TCGA-FV-A3R2-01A-11R-A22L-07	2.35363	4.33952	9.29236	4.96778	0.513369	5.4688	7.72926	9.98015	9.6583	1.64711	5.49295	6.11818	6.26416	8.02046	6.60269	10.3922	7.34622	3.39596	4.15619	6.60964	5.67531	0.0902899	6.24338
TCGA-FV-A3R3-01A-11R-A22L-07	1.04398	5.62206	8.92307	4.19814	0.240295	5.00878	4.35059	8.14812	8.76468	0.634705	4.15251	4.34654	3.44206	7.66038	3.62166	9.54793	7.25469	4.0088	4.112	4.88507	4.85713	0.502191	6.17613
TCGA-FV-A495-01A-11R-A266-07	1.1213	7.23725	8.51577	3.4976	0.463508	4.04865	8.14399	10.3136	9.85964	1.56377	5.38595	5.46157	3.73123	7.94626	2.97562	10.6189	5.80814	1.07947	0.953062	4.42513	4.19154	0.112807	4.25484
TCGA-FV-A496-01A-11R-A266-07	1.17769	3.44399	9.40984	4.23186	0.11565	5.73686	5.0401	7.79253	7.75899	0.769454	3.64448	7.1771	2.64959	6.11778	4.35038	10.1955	7.14604	3.96039	0.711225	4.03025	4.55207	0.194742	7.14193
TCGA-FV-A4ZP-01A-12R-A266-07	0.176867	5.0597	8.63201	2.58179	1.91017	1.89942	4.2222	12.9739	10.1484	2.10226	5.91594	6.15035	5.73692	7.16525	4.6214	13.6069	4.2534	0.468768	0.0927141	2.37636	4.19528	0.0903063	4.643
TCGA-FV-A4ZQ-01A-11R-A266-07	1.30431	4.59292	9.81909	5.36239	1.86222	5.27259	8.719	8.90896	8.55162	2.37661	5.46097	6.93052	7.01599	8.67513	5.19774	11.6766	8.97955	4.06108	0.0797584	5.32963	5.98352	0	8.10865
TCGA-G3-A25S-01A-11R-A16W-07	1.52684	8.96198	8.71717	4.50896	2.06539	4.39093	5.6348	11.2775	9.90672	1.59226	6.06832	4.5112	6.35805	6.97725	4.69405	10.4117	6.64023	1.54164	0.692704	4.22312	4.70891	0.0410136	7.45097
TCGA-G3-A25T-01A-11R-A16W-07	1.78949	8.14443	8.30945	5.18826	1.01433	5.1579	8.45727	10.8011	8.79642	2.23367	5.90923	5.83044	3.52028	8.53337	6.11543	11.8884	6.30607	1.60166	0.21567	2.53355	7.2219	0.0187437	4.03175
TCGA-G3-A25U-01A-11R-A16W-07	1.23887	6.78831	9.2992	4.84522	0.06374	5.58473	10.5092	6.8544	8.10859	2.02028	3.6068	6.28826	1.4636	8.93947	5.94181	10.2225	6.58838	4.0128	5.08355	4.76811	4.51526	0.11813	1.28767
TCGA-G3-A25V-01A-11R-A16W-07	0.953858	6.97535	9.20874	4.50139	2.24567	5.33856	9.72453	7.76348	8.97089	0.854277	5.09593	4.63151	4.6853	8.94447	4.41131	10.1417	6.98728	4.16092	2.39933	4.15555	4.73557	0.0808378	7.91592
TCGA-G3-A25X-01A-11R-A16W-07	1.39801	7.50436	10.6989	5.41251	2.33664	4.84416	3.8044	11.1519	9.10326	1.7127	5.1581	5.48789	6.06536	8.44904	5.66484	11.8189	5.30907	1.0211	0.0548136	5.33052	4.79884	0.0664119	4.43838
TCGA-G3-A25Y-01A-11R-A16W-07	2.16778	8.09658	10.2539	5.00088	0.1422	5.52973	2.19879	9.67383	8.60347	2.63357	4.30467	6.17634	4.03187	8.43436	5.15488	10.5171	7.91737	3.72443	0.959097	5.93244	5.58764	0.0892344	7.43272
TCGA-G3-A25Z-01A-11R-A16W-07	0.148775	5.7186	9.46577	4.94187	0.366657	4.62235	8.80495	8.80432	8.57274	0.948709	5.2573	7.33145	2.06974	8.03119	4.1761	10.149	7.00406	2.444	2.8889	5.0971	4.15684	0.0893453	5.06606
TCGA-G3-A3CG-01A-11R-A213-07	1.59413	7.70953	10.3874	4.85449	0.767714	5.00525	3.11989	7.89057	8.3104	0.755911	4.5179	4.04575	2.37524	9.02455	5.52916	9.51494	7.26201	4.71873	1.95149	4.68063	4.85652	0.0828787	9.16865
TCGA-G3-A3CH-01A-11R-A22L-07	0.641662	7.40496	8.48369	4.7781	0.0648755	5.35784	3.18328	9.06281	7.96504	1.35231	4.63177	5.71239	3.74221	8.32464	4.3931	9.82464	7.07113	3.42538	4.17735	4.46327	4.13748	0.5635	3.49186
TCGA-G3-A3CI-01A-11R-A213-07	0.482745	6.82458	8.56774	2.72873	1.05126	3.77516	9.38479	7.65145	8.11508	0.464511	4.06168	6.56885	3.27581	8.86745	4.05892	9.21328	6.54427	2.37237	2.67887	5.92248	3.8656	0.214976	6.61071
TCGA-G3-A3CJ-01A-11R-A213-07	0.326663	5.99388	7.55665	4.19028	0.0188994	4.9881	11.9762	9.64838	8.87529	0.342768	4.72267	5.20454	2.3424	7.05897	1.88057	10.8795	6.53868	0.861141	0.0146946	5.17825	3.85952	0.0178565	0.61229
TCGA-G3-A3CK-01A-11R-A213-07	0.368656	7.05482	9.77782	4.64485	0.834753	5.38324	5.13733	7.17271	8.32954	0.875681	4.99731	6.20587	2.86026	8.51223	3.48198	9.5227	8.24274	3.68669	0.0549595	5.83412	4.83365	0.0336781	1.60542
TCGA-G3-A5SI-01A-31R-A27V-07	1.27778	7.03462	10.1182	5.26424	0.144233	4.29465	4.61432	8.04477	8.79944	1.63724	5.13877	4.74119	1.44943	8.92678	5.04721	10.1691	7.15144	3.74647	2.13681	3.87189	4.32254	0.396746	0.783461
TCGA-G3-A5SJ-01A-11R-A27V-07	1.37591	6.74298	9.65304	5.67702	1.72907	5.72524	2.90278	10.5454	8.79119	2.07473	4.39938	5.65085	5.20234	8.68319	4.62613	11.4351	5.32876	3.69717	0.291757	4.37957	4.63532	0.0455509	2.88253
TCGA-G3-A5SK-01A-11R-A27V-07	1.22957	6.70078	8.85982	4.07342	0.0326745	5.06326	5.86714	6.36037	8.0398	0.487645	3.31485	3.72824	1.92656	8.53831	3.68597	8.558	6.12854	3.13509	3.02668	5.1597	3.34518	0.0907239	1.49842
TCGA-G3-A5SL-01A-11R-A27V-07	1.5468	7.5848	8.76087	6.05236	1.84485	5.15421	4.36713	9.07662	8.67259	0.682802	4.43529	6.52705	2.54355	8.33312	4.95705	10.5339	7.96727	3.83871	0.0152809	7.28307	4.95558	0.142255	1.87728
TCGA-G3-A5SM-01A-12R-A28V-07	0.585387	4.79936	8.99249	3.82815	0.82092	4.54856	8.14043	8.81179	8.3228	1.0367	4.84133	4.91115	3.1723	8.17492	3.64063	8.94307	7.41873	3.76144	2.83936	4.97439	4.36719	0.0852817	3.52039
TCGA-G3-A6UC-01A-21R-A33J-07	1.61012	7.02197	8.82557	4.39521	0.101173	5.99127	8.35016	8.19174	8.34736	1.3688	3.99296	5.28707	1.32443	8.65474	5.17956	9.70403	7.8183	2.59498	0.303668	7.26373	5.32481	0.109919	3.54891
TCGA-G3-A7M5-01A-11R-A33R-07	0.179371	6.85276	7.40224	4.20142	0.201497	4.11849	3.88893	9.20179	9.71423	0.702181	4.26048	5.76248	1.37345	8.55009	3.33248	9.64435	5.83555	1.44552	2.90789	5.85565	3.85613	0.277809	4.09325
TCGA-G3-A7M6-01A-11R-A33R-07	3.88672	5.49446	9.57884	5.64201	2.71213	5.83071	6.61859	9.84123	8.20368	2.76703	5.1641	5.54417	8.31695	7.24185	4.10145	11.2783	6.88662	4.49236	1.39839	6.8638	5.42756	0.0724122	5.18579
TCGA-G3-A7M7-01A-12R-A352-07	0.295104	7.84491	8.98656	5.40915	0.48936	3.66375	6.61075	9.71382	8.70441	0.616429	4.78146	4.25015	1.40713	8.25031	3.91685	11.5587	6.11222	3.19112	3.30252	3.71253	4.60559	0.166135	6.66929
TCGA-G3-A7M8-01A-11R-A33R-07	0.532679	8.06817	9.54045	3.45847	0.744218	4.05498	5.96586	6.93604	7.37555	0.742585	4.50145	4.75877	2.20764	9.43002	1.81209	8.84732	6.92031	3.24511	4.86856	5.03284	3.8988	0.199338	5.71775
TCGA-G3-A7M9-01A-23R-A352-07	1.79067	5.44527	10.2737	4.77459	0.915288	5.14765	8.56314	10.1293	8.92874	3.81763	5.45045	6.15739	5.86134	7.51015	4.54974	11.6431	7.63133	4.9723	0.473611	4.81283	6.51066	1.36801	5.42952
TCGA-G3-AAUZ-01A-11R-A38B-07	0.624236	8.03203	8.07031	4.16901	0.373763	4.27478	8.45484	9.03163	9.51158	1.54267	4.95096	4.77066	3.01882	8.98178	4.27155	11.4316	5.93132	1.25606	2.54822	3.24385	3.32702	0.223528	2.08603
TCGA-G3-AAV0-01A-11R-A37K-07	1.2002	6.42298	9.72187	3.20423	0.0323595	3.0242	0.849756	8.44037	9.4623	0.470071	3.85765	3.12912	1.74302	8.54483	3.17149	10.0735	6.2162	1.7441	0.611954	3.82242	3.24023	0.551855	5.9026
TCGA-G3-AAV1-01A-11R-A38B-07	0.801127	5.22594	8.70243	5.01789	3.87247	5.56146	6.37546	9.01145	8.33575	1.53325	4.74661	6.3922	2.33859	8.72293	4.4645	10.6073	8.38506	3.48001	1.55272	6.91716	5.41219	0.0597123	1.72991
TCGA-G3-AAV2-01A-11R-A37K-07	1.64843	5.47256	9.01417	4.67366	0.085592	5.29981	1.92101	9.7427	8.95838	0.941981	4.12992	5.26838	1.77769	8.48626	2.18925	10.314	7.31273	2.86469	0.054955	5.86955	4.99544	0.0225374	6.04105
TCGA-G3-AAV3-01A-11R-A37K-07	1.58709	7.2972	9.83721	4.60874	4.25554	5.28233	3.93018	8.92557	9.0174	1.5722	4.69994	6.0671	3.45165	8.10411	4.49591	9.97961	7.48479	2.65149	0.0550454	6.47627	5.24939	0.0666917	3.36888
TCGA-G3-AAV4-01A-11R-A38B-07	1.78366	5.25479	8.80817	4.58543	3.26408	6.38274	7.48088	8.49641	9.17183	0.98604	5.02332	6.96193	2.22632	8.44216	5.42246	9.90819	8.57291	3.34737	0.0881294	8.14221	5.35148	0	1.57148
TCGA-G3-AAV5-01A-11R-A37K-07	0.817738	7.67437	9.48025	5.34149	0.0786063	5.52441	4.08352	9.6536	9.46496	1.48802	5.61777	5.07659	2.04602	9.54267	3.89174	12.0174	7.91335	3.1953	0.137933	3.82995	4.83203	0.0175015	6.46552
TCGA-G3-AAV6-01A-21R-A37K-07	1.12167	4.37431	10.0265	4.49981	2.11433	5.57471	2.27702	10.9249	10.192	2.39034	5.30542	5.97635	4.66069	8.11664	3.77242	12.1739	7.28792	2.02308	0.381113	5.53417	5.58865	0.173681	6.76668
TCGA-G3-AAV7-01A-11R-A38B-07	2.10866	7.81505	10.2508	6.0727	1.81783	5.31015	3.91772	9.70021	9.00459	3.9554	5.76899	6.04855	7.0156	8.20273	6.14278	10.8819	7.69579	4.43244	0.0465196	5.61729	6.74025	0.309401	7.66608
TCGA-GJ-A3OU-01A-31R-A38B-07	1.32512	6.26422	9.59334	5.53839	1.73045	5.4591	7.0949	10.2793	8.82906	1.69698	5.21772	8.01341	5.4103	9.15845	6.42221	11.4352	7.54413	4.56394	0.326428	4.19788	5.42663	0.0864788	7.45765
TCGA-GJ-A6C0-01A-12R-A311-07	1.3099	8.30094	9.13653	4.25908	1.75184	5.27841	3.71298	9.25563	9.39625	1.83116	4.42881	5.14247	4.46925	9.22294	5.34129	9.21015	7.21126	4.75233	1.53756	7.04222	4.99862	0.253012	4.92175
TCGA-GJ-A9DB-01A-11R-A37K-07	1.11983	8.05597	8.84837	4.29672	2.24027	5.33053	6.71435	9.72515	9.45583	2.04243	4.93308	6.10999	4.06919	7.91268	5.40051	9.62024	7.37695	4.11612	3.56275	6.71268	4.99878	1.40714	6.44867
TCGA-HP-A5MZ-01A-21R-A27V-07	1.18647	6.70369	8.57633	5.28268	0.598156	5.03541	5.16385	9.45644	8.52572	0.797461	4.41119	4.98075	3.57577	8.83144	4.26917	10.148	6.86628	3.31695	2.3228	4.96043	4.68105	0.107416	8.4437
TCGA-HP-A5N0-01A-11R-A28V-07	1.38446	6.41634	9.13795	3.90401	0.157014	5.76753	8.65861	8.35509	8.58477	0.496745	4.3336	5.68966	3.17914	8.22342	5.28514	10.0201	7.91701	4.00186	2.7215	4.14833	4.4037	0.497239	5.6387
TCGA-K7-A5RF-01A-11R-A28V-07	0.697408	7.36825	8.39315	3.7699	0.115353	5.70116	11.3727	8.31191	8.27612	0.448001	4.35375	4.90514	3.28132	8.37036	3.02368	9.04319	8.06475	3.81012	4.36239	5.46427	4.2041	0.109185	2.74924
TCGA-K7-A5RG-01A-11R-A28V-07	1.03894	6.76563	8.2202	4.05877	0.759415	5.09655	6.04603	9.44166	8.76832	2.44046	4.05678	5.52709	4.6187	7.95542	4.82865	9.20902	7.24818	4.71311	1.96992	6.52609	4.80454	0.444873	6.76095
TCGA-K7-A6G5-01A-11R-A311-07	0.85445	6.92636	8.89968	4.83935	0.436285	4.99246	6.42052	8.42935	8.60177	0.752981	4.85953	5.08338	4.08903	8.83452	4.18969	11.0641	6.84544	3.95213	0.78949	4.17213	4.6764	0.0802116	9.74264
TCGA-K7-AAU7-01A-11R-A38B-07	1.94564	7.26644	9.53468	5.54853	3.43743	5.42372	5.725	10.0226	8.6811	2.38428	4.87851	5.34523	5.54856	8.66159	5.61238	11.5857	6.57754	2.95908	0.679309	3.97807	5.8564	0.0590843	7.48769
TCGA-KR-A7K0-01A-12R-A33R-07	1.53367	6.78754	9.19312	4.42876	2.05397	5.24618	8.37374	8.00256	9.25608	0.853191	4.74985	5.69394	3.85573	8.8902	3.70121	9.62359	6.87716	3.565	0.598944	6.07353	5.2201	0	5.05161
TCGA-KR-A7K2-01A-12R-A33R-07	1.93744	5.69429	9.27446	4.4351	0.10721	3.96153	1.10076	10.8094	9.40762	0.721583	3.86218	4.80904	2.60919	8.71469	3.84905	10.8156	5.68096	1.08849	0.827002	4.76919	4.77704	0.160529	6.00216
TCGA-KR-A7K7-01A-11R-A33J-07	1.52352	6.26153	9.1707	4.70687	0.928708	3.63034	5.0698	11.3126	9.27085	1.71295	4.31583	5.91627	3.20417	7.50417	2.99606	12.5053	6.03705	1.94367	0.0326306	3.68772	5.46424	0.0395993	7.22165
TCGA-KR-A7K8-01A-11R-A33J-07	1.66553	6.68794	8.45307	3.86047	0.263517	5.00364	5.93448	9.76537	9.66593	1.75685	4.16608	5.81314	3.67629	7.76076	3.98525	9.91778	5.89222	4.98339	0.0191128	5.92313	3.92096	0.633757	3.40465
TCGA-LG-A6GG-01A-11R-A311-07	0.817635	6.73593	10.3993	4.23316	1.85805	6.21791	3.60403	9.30943	9.09451	1.35513	4.93761	5.09425	1.61804	6.84976	5.7346	9.23743	7.86663	5.17187	2.83589	6.22222	4.61855	0.388776	6.9326
TCGA-LG-A9QC-01A-11R-A37K-07	1.56798	6.81785	8.53339	4.83216	2.05056	5.85237	1.20231	9.87755	8.93064	0.801167	4.76173	5.58781	2.18615	8.04423	3.86118	9.43588	7.98475	3.79511	0	7.04317	5.3223	0.0507914	5.27657
TCGA-LG-A9QD-01A-11R-A38B-07	0.725509	6.43717	9.33543	5.15919	0.0428444	4.63742	10.6161	8.88183	7.51692	0.408368	3.85413	4.49599	2.21403	8.46561	3.05104	10.2532	6.47447	3.08859	2.54703	4.24548	4.17384	0.0854321	6.1631
TCGA-MI-A75C-01A-11R-A32O-07	0.543694	6.97857	8.44359	5.01648	1.5454	4.86934	2.22662	10.0306	8.16694	1.31028	4.21572	5.19288	4.8336	8.07314	3.50828	11.8392	6.77879	3.16168	0.420884	3.33198	5.06575	0.0378551	6.70346
TCGA-MI-A75E-01A-11R-A32O-07	0.815923	6.33852	8.97293	4.13363	0.892855	4.85436	6.16758	8.8927	9.44015	0.835542	4.66251	5.1252	3.12374	8.5909	5.17121	9.92955	7.15642	3.55208	2.94469	4.8642	4.34844	0.136696	8.14836
TCGA-MI-A75G-01A-11R-A32O-07	0.980674	5.92191	8.72835	4.1936	0.390489	5.41471	8.26332	9.70691	9.67639	1.06733	4.74927	6.28993	2.41862	9.06852	5.12351	10.2418	7.82456	4.46245	3.46117	4.67415	4.87528	0.019417	7.83762
TCGA-MI-A75H-01A-11R-A32O-07	1.91398	5.55803	8.39642	4.67941	0.116981	5.19302	6.35617	8.94327	9.22008	0.724974	4.36979	4.37767	2.52797	8.92061	3.22409	11.0431	7.18808	1.89594	0.0595708	5.74012	4.4663	0.0954209	3.95795
TCGA-MI-A75I-01A-11R-A32O-07	3.07769	6.97788	9.51261	5.34324	1.95842	5.00362	2.38213	9.0923	9.55381	1.55154	4.87273	4.77234	4.26656	7.10264	5.51189	11.2554	6.90113	3.14787	0.891533	5.23428	5.05537	0.0229068	6.88068
TCGA-MR-A520-01A-11R-A266-07	0.658193	6.90655	8.47224	3.48369	0.80504	3.70458	8.45085	6.66376	8.18873	0.558582	4.54956	6.981	2.03852	8.9405	3.05168	8.91057	7.09872	2.70154	4.17084	6.38015	4.04559	0.0594412	7.11098
TCGA-MR-A8JO-01A-12R-A36F-07	1.4036	6.38642	9.03969	5.1994	1.52462	4.41496	6.70368	8.74476	7.66744	0.714263	4.88481	3.12227	3.49392	8.69351	3.65761	11.2192	6.52801	1.31729	1.17469	1.83143	4.53205	0.114192	3.72117
TCGA-NI-A4U2-01A-11R-A28V-07	0.731457	4.49408	8.89538	3.89939	1.54409	3.65562	2.56545	6.87639	9.26806	0.374397	4.63082	3.79504	1.65457	8.65126	3.61609	8.94463	6.64502	2.07622	1.75588	5.7731	3.7393	0.0839807	1.48251
TCGA-NI-A8LF-01A-11R-A36F-07	1.43281	4.7658	7.73461	4.09565	0.52057	4.33352	7.0492	9.27658	8.22414	0.707561	3.99238	5.7648	2.61882	8.10518	3.88998	8.05888	7.51444	3.46561	0.586457	6.0074	4.58107	0	1.4634
TCGA-O8-A75V-01A-11R-A32O-07	0.687293	7.71389	9.21987	5.87401	0.218061	4.12581	4.86055	10.6523	9.14935	0.840706	4.56597	5.88494	3.05459	7.70027	3.74956	11.2146	6.66138	3.76039	0.641607	5.25356	4.96067	0.101649	7.37908
TCGA-PD-A5DF-01A-11R-A27V-07	1.56213	8.49299	9.58289	4.6208	1.27213	4.79957	3.43289	9.53582	9.29838	1.82082	5.1594	5.54993	3.31793	8.09585	5.13975	9.80751	7.12437	3.29375	0.690512	5.22691	5.008	0.217032	6.5596
TCGA-QA-A7B7-01A-11R-A32O-07	2.06544	9.48321	10.319	3.75827	0.720104	4.62836	1.62987	8.47248	8.67325	4.24928	4.58121	6.39575	1.98757	7.00503	4.89602	8.72503	6.90591	3.89343	1.366	4.05889	5.443	1.15495	6.68453
TCGA-RC-A6M3-01A-11R-A32O-07	2.39515	7.97368	10.3118	4.71227	1.68506	5.03552	8.5959	11.7481	8.33443	2.4125	5.16436	5.09172	5.83216	8.80804	4.97944	11.7812	5.56941	2.85991	0.561854	3.66672	5.73671	0.0383551	5.74137
TCGA-RC-A6M4-01A-11R-A32O-07	1.12682	5.71443	8.48765	5.43569	0.0356066	6.00082	9.07423	9.41286	8.77698	1.4569	5.10396	6.77951	0.982923	7.88151	4.77538	11.0256	7.18928	3.53616	0.0549179	6.99428	4.87082	0.0501889	0.739834
TCGA-RC-A6M5-01A-11R-A32O-07	0.895407	6.83894	9.34356	4.31555	1.46864	4.25417	11.5032	8.61044	8.20456	0.408215	4.98166	4.56948	3.53163	8.94255	2.65708	9.91775	7.24116	2.85153	4.10679	1.48963	4.6949	0.355566	2.96864
TCGA-RC-A6M6-01A-11R-A32O-07	1.71068	6.75693	9.9432	4.75112	2.86152	4.28626	3.13598	10.6741	9.38116	3.20397	5.06467	4.75988	4.68099	7.79966	5.49123	13.478	7.06668	4.01015	0.520207	4.64275	5.07838	0.299914	6.18359
TCGA-RC-A7S9-01A-11R-A33R-07	1.01919	7.0053	10.5159	4.17929	0.0980292	4.17721	2.70889	8.24961	8.18056	1.32629	5.04242	4.11094	2.62991	8.48343	3.53438	10.3426	6.38034	2.24506	0.796543	2.45984	4.15991	0.0871316	6.98412
TCGA-RC-A7SB-01A-21R-A352-07	0.846058	4.23848	7.01265	3.65623	0.530012	4.37363	7.28278	9.17591	9.51275	1.41658	4.99936	6.84205	2.07839	7.33715	4.23874	9.49091	6.22943	2.65045	2.62326	5.9947	3.74428	0.102156	3.67654
TCGA-RC-A7SF-01A-11R-A352-07	0.631336	7.48621	8.09537	5.11314	0.454195	3.77692	2.1532	10.2646	8.88985	1.44162	3.82204	4.81321	2.0696	7.8503	4.11076	11.6113	6.04961	3.72782	1.00842	3.21914	3.70284	0.125872	7.51143
TCGA-RC-A7SH-01A-11R-A38B-07	2.68246	6.6713	7.6428	4.38596	0.53135	3.74214	0.929151	10.5717	8.76783	2.56325	4.47657	4.96545	4.20168	7.24837	4.53274	10.7163	7.30104	1.88399	0.149482	2.5653	4.95061	0	8.43923
TCGA-RC-A7SK-01A-11R-A352-07	0.79364	4.51998	6.9493	5.84775	0.132447	5.23021	3.88156	9.81161	9.24896	1.47684	4.41681	5.17393	2.68422	7.04111	4.20233	9.56718	6.87505	2.60436	4.63955	5.57022	4.30972	0.696487	6.15515
TCGA-RG-A7D4-01A-12R-A33R-07	1.33804	3.14521	9.42006	5.1154	1.32125	4.79788	4.83353	10.5095	8.57911	2.76084	4.50921	5.8225	3.58707	7.83315	4.33383	11.4734	7.46109	4.28891	0.0613702	6.73555	5.73127	0.0252013	7.25733
TCGA-T1-A6J8-01A-11R-A32O-07	0.467542	6.22216	8.83211	3.71669	0.281097	4.97285	1.78746	9.31198	8.94287	0.810821	5.21898	5.3345	3.33424	6.54715	4.13286	9.40088	7.27027	2.5111	0.32253	5.8592	4.86149	0.151628	6.94234
TCGA-UB-A7MA-01A-11R-A33R-07	0.860456	7.98799	9.08883	4.92529	0.585468	5.24156	2.71915	10.4786	9.91673	3.01811	5.66244	5.31764	3.95511	7.60309	4.34205	11.4429	7.48253	3.35832	0.185426	4.69659	5.88933	0.115598	4.84021
TCGA-UB-A7MB-01A-11R-A33R-07	0.578138	7.65592	9.17352	4.67522	0.911139	5.53989	2.97415	9.32605	8.98596	2.9941	5.57094	6.15732	3.4662	8.10815	6.09925	11.049	7.44975	4.23241	2.74522	6.06927	5.8896	0.357403	1.35968
TCGA-UB-A7MC-01A-11R-A33R-07	1.75282	6.46121	8.33506	4.99424	1.95782	5.65161	15.9008	9.96577	9.03332	2.76393	4.9042	6.82785	1.54401	8.85703	4.79843	10.5207	8.13015	3.38025	0.20946	7.24581	5.20714	0.155816	1.27432
TCGA-UB-A7MD-01A-12R-A352-07	0.637814	6.70651	9.13343	4.78535	3.77703	5.61876	10.3826	10.0631	9.51871	1.27462	4.17968	5.25602	4.41141	9.00724	5.45739	10.7589	6.55922	3.76883	1.40422	6.2249	5.36284	0.114741	6.38206
TCGA-UB-A7ME-01A-11R-A33J-07	1.78134	6.68038	9.03975	4.8878	0.118877	4.29091	5.08738	10.5671	8.95414	1.91166	3.83262	6.934	3.95253	7.28304	5.15894	11.0572	7.12446	3.81256	0.65548	5.71612	4.65056	1.13855	7.43227
TCGA-UB-A7MF-01A-11R-A33J-07	0.813539	8.53103	9.19872	4.27557	0.343612	4.39649	3.64281	9.49717	8.3166	1.74715	5.58159	6.3753	4.407	8.43066	5.48657	9.84876	7.6121	4.34355	2.51806	3.0988	5.73584	0.102646	5.20814
TCGA-UB-AA0U-01A-11R-A38B-07	0.93509	7.55214	9.07827	4.90856	0.0916468	5.30418	6.95495	8.98469	7.96314	1.64833	5.00262	5.37097	3.17399	7.45514	5.50244	9.73076	7.98937	4.08991	1.45202	4.67436	5.18447	0.773612	6.81102
TCGA-UB-AA0V-01A-11R-A38B-07	1.23001	6.4059	8.6174	4.18716	0.053454	5.41856	10.5447	7.43282	7.7297	0.805229	4.59494	4.90968	3.00265	8.33045	4.12145	8.98444	7.4551	3.65226	1.69292	5.14184	4.42898	0.146593	2.63982
TCGA-WJ-A86L-01A-12R-A39D-07	0.586878	8.63796	8.47463	2.80907	2.1061	4.3358	0.856169	8.81098	9.33123	1.717	3.57841	5.37562	2.55631	6.75711	5.5288	8.90793	7.19332	3.23099	0.0945445	4.88855	4.12938	0.185638	6.61685
TCGA-WQ-A9G7-01A-11R-A37K-07	1.51306	5.85457	8.17105	4.03835	0.613707	3.8517	8.06774	11.3544	9.63222	3.15348	3.39369	5.17646	5.75719	6.98933	4.85821	11.4552	5.66629	1.47162	0.45623	3.26821	5.37356	0.0258783	7.20204
TCGA-WQ-AB4B-01A-11R-A41C-07	0.467323	6.58353	8.35356	4.78077	0.340003	3.04556	11.2521	10.8994	9.04361	0.876382	4.4855	5.05557	2.75707	8.09433	2.55846	10.8748	5.83261	0.905559	0.380671	4.77533	4.1432	0	6.03999
TCGA-WX-AA44-01A-11R-A39D-07	1.91215	8.0627	9.22472	4.48006	2.41479	5.30405	4.663	9.75709	9.27109	1.61821	4.18574	5.74013	6.1435	7.55875	6.38637	10.7277	6.84729	2.14016	0.188523	5.32575	4.82049	0.133616	8.35263
TCGA-WX-AA46-01A-11R-A39D-07	0.82709	7.3029	8.50764	3.98412	0.0601716	5.31239	11.1797	8.34055	8.23187	0.391782	4.31757	4.50561	3.11162	7.81991	4.09659	9.56926	7.38394	3.37592	1.78403	5.94617	4.25154	0.0770411	1.91269
TCGA-WX-AA47-01A-11R-A39D-07	0.419835	5.99863	7.80988	2.91199	0.969255	3.09267	5.02552	7.47407	7.66452	0.314272	3.97506	2.98689	2.30643	9.02303	2.65716	9.76031	5.41773	0.849159	0.456092	0.311417	4.32426	0.01753	5.88502
TCGA-XR-A8TC-01A-11R-A36F-07	1.88488	5.62006	9.05247	5.27767	0.330013	4.88066	4.49511	9.05412	8.06955	2.00226	5.28751	5.25151	2.13996	7.9481	5.23647	10.2807	8.0272	4.49255	3.36163	6.7781	5.57566	0.0617011	8.38661
TCGA-XR-A8TD-01A-12R-A39D-07	1.11816	8.90001	8.67521	3.91402	0.363501	4.38128	6.43905	8.20733	8.88279	1.95784	3.82989	4.99065	3.84159	8.66771	6.70436	9.43457	7.45545	4.71701	0.320358	5.79368	4.83853	0.110495	3.13285
TCGA-XR-A8TE-01A-11R-A36F-07	1.33678	7.71641	9.6996	4.28233	4.48705	6.43641	1.4557	11.2843	8.42544	0.681446	3.54381	7.51264	3.74236	9.37268	4.1442	9.6454	8.67549	3.40088	0.114164	6.5737	6.06292	0.0238885	7.13562
TCGA-XR-A8TF-01A-11R-A36F-07	1.58871	5.5961	7.82978	4.17654	0.78392	5.07959	8.44502	9.40951	9.08753	1.35039	5.11399	4.61813	2.13185	8.58232	4.26411	10.3222	7.18505	3.55415	0.981137	5.72637	5.04786	0.0685948	4.64858
TCGA-XR-A8TG-01A-11R-A36F-07	1.1802	8.55222	10.028	4.55408	1.77703	5.87442	5.81672	8.3425	8.46698	2.80242	4.73762	5.43222	3.91515	8.66934	5.0482	9.47783	7.53121	3.06654	3.96166	6.62686	5.08518	0.283959	7.54601
TCGA-YA-A8S7-01A-11R-A37K-07	1.6918	6.14525	9.87557	5.33779	4.54897	5.70401	7.78367	10.5656	9.90912	2.54054	5.09767	4.49934	7.70584	9.36803	5.82163	11.998	6.83252	3.49034	0.262508	6.56755	5.86032	0.0529016	5.67389
TCGA-ZP-A9CV-01A-11R-A38B-07	0.958894	7.18172	10.1993	5.16519	0.091263	6.06852	8.78562	8.46401	8.14804	1.12949	4.29001	4.98774	2.62746	8.09093	4.35765	9.69865	7.69885	4.71774	3.17486	6.35982	6.06703	0.199153	10.0326
TCGA-ZP-A9CY-01A-11R-A38B-07	0.894158	6.36754	9.00545	3.87377	0.0891556	5.09972	7.96875	7.78066	8.40843	0.805063	4.81633	5.36257	2.49312	8.52167	3.80124	8.98755	7.79755	4.14884	3.72122	5.10474	4.29318	0.427421	7.73016
TCGA-ZP-A9CZ-01A-11R-A38B-07	1.15805	7.6397	8.99818	4.44091	0.230985	5.20045	2.63465	8.87441	8.66009	2.22409	5.37167	5.65875	4.34106	8.3778	5.53878	9.75839	7.25008	3.14998	4.54616	6.32735	5.24244	0.369101	7.39018
TCGA-ZP-A9D0-01A-11R-A37K-07	1.37066	5.66264	8.71945	4.06359	0.566372	5.17093	3.26936	8.11505	8.98154	0.494507	4.30303	4.78508	1.83271	8.40653	4.72589	9.6645	7.95943	3.68679	5.68671	5.4034	4.77554	0.0221628	5.75204
TCGA-ZP-A9D1-01A-11R-A38B-07	1.42542	6.57602	10.1283	4.82926	2.26764	5.53578	5.59434	9.51501	8.31762	0.817997	4.17991	5.4122	3.16356	7.99596	5.2938	9.14145	7.07891	3.96957	0.444301	5.34536	4.57323	0.211568	8.0154
TCGA-ZP-A9D2-01A-11R-A38B-07	2.26149	6.21063	10.2739	5.70471	2.64029	6.57797	5.69853	9.5237	8.93884	3.14873	5.22995	5.52213	5.96954	8.09379	5.13348	9.79057	7.36327	4.51134	0.386253	6.13715	5.53627	0.169267	6.59962
TCGA-ZP-A9D4-01A-11R-A37K-07	1.68463	7.28678	7.67269	4.49855	0.0401428	5.70529	1.61172	7.5933	8.14947	0.900106	4.14318	5.04854	1.23955	7.02445	4.83203	9.96169	7.85879	4.3224	0.385912	7.15439	6.0993	0.0190962	2.1744
TCGA-ZS-A9CD-01A-11R-A37K-07	0.552095	7.22139	9.58638	5.544	0.771111	4.51693	7.08868	10.1306	9.11996	0.552715	4.32342	5.24103	3.75142	8.73577	4.03722	11.1133	6.56651	3.44235	1.05193	4.76457	4.92727	0.120413	8.67308
TCGA-ZS-A9CE-01A-11R-A37K-07	0.593399	6.33574	8.71874	3.75407	0.271795	3.66586	0.070804	8.24656	8.95469	0.545285	3.94052	4.90768	1.27895	7.11777	3.5229	9.48103	6.78292	3.42613	1.94545	5.48071	4.24366	1.46001	5.85896
TCGA-ZS-A9CF-01A-11R-A38B-07	1.41713	7.67581	9.50872	3.96993	0.335369	6.17703	4.27365	9.05581	8.4918	2.22746	4.41712	5.58403	2.24786	8.30173	5.20052	9.69363	7.85701	4.53081	5.30905	5.17634	5.02376	0.705121	5.12707
TCGA-ZS-A9CF-02A-11R-A38B-07	1.75304	7.37213	8.49242	4.22932	0.236211	5.67628	6.51183	6.97873	7.843	2.86708	4.24036	4.29579	2.27911	8.24865	4.53586	9.96669	7.14999	3.79061	5.40489	3.25087	5.57129	0.333603	5.31313
TCGA-ZS-A9CG-01A-11R-A37K-07	1.42817	6.82253	8.68104	5.59317	1.78194	5.8569	2.22303	10.3007	9.23318	0.605604	4.41919	5.14786	2.55429	8.5907	3.9677	11.3453	7.4291	3.15405	0.0910477	7.40212	5.63888	0	3.38354

## Sheet: Correlations in LIHC
Genes	Cor	abscor	Pvalue
CDKN1A	0.0144288	0.0144288	0.78092
HSPA5	0.268295	0.268295	1.37835e-07
EMC2	0.227827	0.227827	8.59219e-06
SLC7A11	0.121397	0.121397	0.0188472
NFE2L2	0.247727	0.247727	1.23098e-06
MT1G	-0.101725	0.101725	0.0493236
HSPB1	0.205351	0.205351	6.31485e-05
GPX4	0.0614656	0.0614656	0.235689
FANCD2	0.437037	0.437037	0
CISD1	0.150219	0.150219	0.00359227
FDFT1	0.131782	0.131782	0.0107368
SLC1A5	0.23059	0.23059	6.62673e-06
SAT1	-0.0824897	0.0824897	0.111239
TFRC	0.283284	0.283284	2.4794e-08
RPL8	0.210585	0.210585	4.04284e-05
NCOA4	0.203557	0.203557	7.33884e-05
LPCAT3	0.134743	0.134743	0.00908099
GLS2	-0.222844	0.222844	1.36139e-05
DPP4	0.1066	0.1066	0.0393495
CS	0.464308	0.464308	0
ALOX15	-0.00349338	0.00349338	0.946317
ACSL4	0.139822	0.139822	0.00676291

## Sheet: Correlation-Spearman-LIHC
rowname_id	ZNF419	CDKN1A	HSPA5	EMC2	SLC7A11	NFE2L2	MT1G	HSPB1	GPX4	FANCD2	CISD1	FDFT1	SLC1A5	SAT1	TFRC	RPL8	NCOA4	LPCAT3	GLS2	DPP4	CS	ALOX15	ACSL4
ZNF419	1	0.0144288	0.268295	0.227827	0.121397	0.247727	-0.101725	0.205351	0.0614656	0.437037	0.150219	0.131782	0.23059	-0.0824897	0.283284	0.210585	0.203557	0.134743	-0.222844	0.1066	0.464308	-0.00349338	0.139822
CDKN1A	0.0144288	1	0.114384	-0.052623	0.0351251	0.144984	-0.1067	-0.0652097	-0.0575968	0.125754	-0.0686445	0.0103322	0.131621	0.0817797	0.272463	-0.280613	0.0244209	0.166246	0.211138	-0.0537114	0.11308	0.226957	0.00131428
HSPA5	0.268295	0.114384	1	0.313704	0.239355	0.144683	-0.12507	0.0666333	-0.0559082	0.35257	0.15387	0.171395	0.320365	0.00904715	0.325023	0.175418	0.157657	0.272183	-0.0792923	-0.0973524	0.330158	0.145748	0.304569
EMC2	0.227827	-0.052623	0.313704	1	0.308085	0.3382	-0.0863177	0.286018	-0.0551446	0.234979	0.222666	0.142524	0.266861	0.0150188	0.256664	0.514619	0.153931	0.15163	-0.249422	0.135904	0.426449	-0.0477377	0.0717591
SLC7A11	0.121397	0.0351251	0.239355	0.308085	1	0.23361	0.0209455	0.190186	0.0785974	0.315996	0.280843	0.264544	0.424585	0.0250063	0.302142	0.192118	0.106803	0.0976228	-0.265278	0.129487	0.352009	-0.141863	0.109414
NFE2L2	0.247727	0.144984	0.144683	0.3382	0.23361	1	0.00513266	-0.127378	-0.152729	0.261283	0.00613875	0.293722	0.0875731	0.0798088	0.346126	-0.0855226	0.560302	0.475566	-0.0135228	0.439031	0.479814	0.0754009	-0.00149733
MT1G	-0.101725	-0.1067	-0.12507	-0.0863177	0.0209455	0.00513266	1	-0.107972	-0.173585	-0.0521791	0.0311039	0.139598	0.0174182	0.187838	-0.101338	-0.0514361	-0.0332168	-0.0287476	0.0960467	0.0249492	-0.132786	-0.0262024	-0.155031
HSPB1	0.205351	-0.0652097	0.0666333	0.286018	0.190186	-0.127378	-0.107972	1	0.349545	0.284981	0.158386	0.121485	0.352611	-0.186294	0.0683438	0.600431	-0.235653	-0.200486	-0.333101	-0.082931	0.226669	-0.0854179	0.103363
GPX4	0.0614656	-0.0575968	-0.0559082	-0.0551446	0.0785974	-0.152729	-0.173585	0.349545	1	0.0451339	0.15067	0.0077268	0.0251281	-0.143285	-0.0434681	0.23656	-0.159814	-0.230039	-0.177884	0.0767105	-0.0501855	0.0371956	-0.0377162
FANCD2	0.437037	0.125754	0.35257	0.234979	0.315996	0.261283	-0.0521791	0.284981	0.0451339	1	0.331099	0.361741	0.490944	-0.238209	0.559305	0.261058	0.201105	0.388758	-0.038736	0.0405641	0.521138	0.207195	0.238207
CISD1	0.150219	-0.0686445	0.15387	0.222666	0.280843	0.00613875	0.0311039	0.158386	0.15067	0.331099	1	0.15624	0.220957	0.0132032	0.233172	0.232583	0.159796	0.0425616	-0.129847	0.0141756	0.284441	-0.0107582	-0.0537928
FDFT1	0.131782	0.0103322	0.171395	0.142524	0.264544	0.293722	0.139598	0.121485	0.0077268	0.361741	0.15624	1	0.110388	-0.175377	0.176144	0.0624907	0.368437	0.329634	-0.0724238	0.318276	0.311238	0.114218	0.0988094
SLC1A5	0.23059	0.131621	0.320365	0.266861	0.424585	0.0875731	0.0174182	0.352611	0.0251281	0.490944	0.220957	0.110388	1	-0.0651677	0.421701	0.389399	-0.148755	0.123121	-0.172775	-0.239232	0.348458	0.0933114	0.31307
SAT1	-0.0824897	0.0817797	0.00904715	0.0150188	0.0250063	0.0798088	0.187838	-0.186294	-0.143285	-0.238209	0.0132032	-0.175377	-0.0651677	1	-0.101816	-0.123296	-0.0035414	-0.0852978	0.0485818	-0.0779473	-0.0503066	-0.114506	-0.114933
TFRC	0.283284	0.272463	0.325023	0.256664	0.302142	0.346126	-0.101338	0.0683438	-0.0434681	0.559305	0.233172	0.176144	0.421701	-0.101816	1	0.0626713	0.235281	0.44419	0.0712379	0.0243078	0.468567	0.179491	0.228186
RPL8	0.210585	-0.280613	0.175418	0.514619	0.192118	-0.0855226	-0.0514361	0.600431	0.23656	0.261058	0.232583	0.0624907	0.389399	-0.123296	0.0626713	1	-0.23313	-0.203913	-0.463476	-0.185945	0.247285	-0.220046	0.158296
NCOA4	0.203557	0.0244209	0.157657	0.153931	0.106803	0.560302	-0.0332168	-0.235653	-0.159814	0.201105	0.159796	0.368437	-0.148755	-0.0035414	0.235281	-0.23313	1	0.592321	0.0815644	0.490671	0.493218	0.0875253	0.126343
LPCAT3	0.134743	0.166246	0.272183	0.15163	0.0976228	0.475566	-0.0287476	-0.200486	-0.230039	0.388758	0.0425616	0.329634	0.123121	-0.0852978	0.44419	-0.203913	0.592321	1	0.265972	0.219279	0.470899	0.263179	0.294763
GLS2	-0.222844	0.211138	-0.0792923	-0.249422	-0.265278	-0.0135228	0.0960467	-0.333101	-0.177884	-0.038736	-0.129847	-0.0724238	-0.172775	0.0485818	0.0712379	-0.463476	0.0815644	0.265972	1	-0.0743495	-0.210246	0.382167	0.0908979
DPP4	0.1066	-0.0537114	-0.0973524	0.135904	0.129487	0.439031	0.0249492	-0.082931	0.0767105	0.0405641	0.0141756	0.318276	-0.239232	-0.0779473	0.0243078	-0.185945	0.490671	0.219279	-0.0743495	1	0.219113	0.0540973	-0.148452
CS	0.464308	0.11308	0.330158	0.426449	0.352009	0.479814	-0.132786	0.226669	-0.0501855	0.521138	0.284441	0.311238	0.348458	-0.0503066	0.468567	0.247285	0.493218	0.470899	-0.210246	0.219113	1	-0.0473204	0.187219
ALOX15	-0.00349338	0.226957	0.145748	-0.0477377	-0.141863	0.0754009	-0.0262024	-0.0854179	0.0371956	0.207195	-0.0107582	0.114218	0.0933114	-0.114506	0.179491	-0.220046	0.0875253	0.263179	0.382167	0.0540973	-0.0473204	1	0.0595773
ACSL4	0.139822	0.00131428	0.304569	0.0717591	0.109414	-0.00149733	-0.155031	0.103363	-0.0377162	0.238207	-0.0537928	0.0988094	0.31307	-0.114933	0.228186	0.158296	0.126343	0.294763	0.0908979	-0.148452	0.187219	0.0595773	1

## Sheet: p value-LIHC
rowname_id	ZNF419	CDKN1A	HSPA5	EMC2	SLC7A11	NFE2L2	MT1G	HSPB1	GPX4	FANCD2	CISD1	FDFT1	SLC1A5	SAT1	TFRC	RPL8	NCOA4	LPCAT3	GLS2	DPP4	CS	ALOX15	ACSL4
ZNF419		0.78092	1.37835e-07	8.59219e-06	0.0188472	1.23098e-06	0.0493236	6.31485e-05	0.235689	0	0.00359227	0.0107368	6.62673e-06	0.111239	2.4794e-08	4.04284e-05	7.33884e-05	0.00908099	1.36139e-05	0.0393495	0	0.946317	0.00676291
CDKN1A	0.78092		0.0269702	0.310117	0.498265	0.00496435	0.039163	0.208315	0.266541	0.0149536	0.18529	0.842144	0.0108339	0.11436	8.64295e-08	3.39133e-08	0.637807	0.00125197	3.85448e-05	0.300202	0.0287748	9.31832e-06	0.97979
HSPA5	1.37835e-07	0.0269702		5.5143e-10	2.84606e-06	0.00505607	0.0155141	0.198533	0.280838	2.18225e-12	0.00284953	0.000874108	2.25686e-10	0.861566	1.19248e-10	0.000655529	0.00222909	8.92099e-08	0.125839	0.0599892	5.82758e-11	0.00473854	1.81183e-09
EMC2	8.59219e-06	0.310117	5.5143e-10		1.15178e-09	1.84799e-11	0.0955485	1.79307e-08	0.287471	4.35785e-06	1.38378e-05	0.0057597	1.61557e-07	0.772204	4.86505e-07	0	0.00283827	0.00328663	1.03497e-06	0.00849619	0	0.357239	0.166084
SLC7A11	0.0188472	0.498265	2.84606e-06	1.15178e-09		4.97078e-06	0.686393	0.000215996	0.129201	4.06492e-10	3.30165e-08	2.08388e-07	0	0.629766	2.46843e-09	0.000185622	0.0389738	0.0592784	1.92299e-07	0.0121992	2.37677e-12	0.00599193	0.0344093
NFE2L2	1.23098e-06	0.00496435	0.00505607	1.84799e-11	4.97078e-06		0.921194	0.0136944	0.00306492	2.96962e-07	0.905813	7.06019e-09	0.0908054	0.123385	5.76517e-12	0.098653	0	0	0.794359	0	0	0.145566	0.976976
MT1G	0.0493236	0.039163	0.0155141	0.0955485	0.686393	0.921194		0.0368712	0.000747958	0.314221	0.548738	0.00685269	0.73706	0.000259165	0.0501982	0.321171	0.521907	0.579438	0.0635208	0.630549	0.0101476	0.613473	0.00264439
HSPB1	6.31485e-05	0.208315	0.198533	1.79307e-08	0.000215996	0.0136944	0.0368712		3.45235e-12	2.02828e-08	0.00212485	0.0187603	2.16849e-12	0.000291827	0.187228	0	4.08342e-06	9.46405e-05	3.84273e-11	0.109333	9.5712e-06	0.0990678	0.0457588
GPX4	0.235689	0.266541	0.280838	0.287471	0.129201	0.00306492	0.000747958	3.45235e-12		0.384098	0.00349187	0.881608	0.628099	0.00550213	0.40191	3.73946e-06	0.00193353	6.98091e-06	0.000547864	0.138679	0.333093	0.47327	0.467095
FANCD2	0	0.0149536	2.18225e-12	4.35785e-06	4.06492e-10	2.96962e-07	0.314221	2.02828e-08	0.384098		5.10345e-11	5.2669e-13	0	3.18434e-06	0	3.04264e-07	8.99357e-05	6.21725e-15	0.455129	0.434116	0	5.40375e-05	3.18512e-06
CISD1	0.00359227	0.18529	0.00284953	1.38378e-05	3.30165e-08	0.905813	0.548738	0.00212485	0.00349187	5.10345e-11		0.00244504	1.61626e-05	0.799114	5.18388e-06	5.48412e-06	0.00193589	0.411807	0.0119589	0.78467	2.16244e-08	0.835726	0.299469
FDFT1	0.0107368	0.842144	0.000874108	0.0057597	2.08388e-07	7.06019e-09	0.00685269	0.0187603	0.881608	5.2669e-13	0.00244504		0.0328286	0.000657511	0.000621973	0.227954	1.81188e-13	6.27289e-11	0.162186	2.99359e-10	7.63247e-10	0.0271948	0.0562413
SLC1A5	6.62673e-06	0.0108339	2.25686e-10	1.61557e-07	0	0.0908054	0.73706	2.16849e-12	0.628099	0	1.61626e-05	0.0328286		0.208608	0	5.32907e-15	0.00393651	0.017212	0.000792507	2.88065e-06	4.06652e-12	0.0714745	5.99667e-10
SAT1	0.111239	0.11436	0.861566	0.772204	0.629766	0.123385	0.000259165	0.000291827	0.00550213	3.18434e-06	0.799114	0.000657511	0.208608		0.0491196	0.0170529	0.94558	0.0995452	0.348791	0.132408	0.331926	0.0268069	0.0262414
TFRC	2.4794e-08	8.64295e-08	1.19248e-10	4.86505e-07	2.46843e-09	5.76517e-12	0.0501982	0.187228	0.40191	0	5.18388e-06	0.000621973	0	0.0491196		0.22661	4.23254e-06	0	0.16919	0.639365	0	0.000486745	8.30826e-06
RPL8	4.04284e-05	3.39133e-08	0.000655529	0	0.000185622	0.098653	0.321171	0	3.73946e-06	3.04264e-07	5.48412e-06	0.227954	5.32907e-15	0.0170529	0.22661		5.20485e-06	7.1242e-05	0	0.000299702	1.28768e-06	1.75488e-05	0.00213755
NCOA4	7.33884e-05	0.637807	0.00222909	0.00283827	0.0389738	0	0.521907	4.08342e-06	0.00193353	8.99357e-05	0.00193589	1.81188e-13	0.00393651	0.94558	4.23254e-06	5.20485e-06		0	0.11532	0	0	0.0909826	0.0144862
LPCAT3	0.00908099	0.00125197	8.92099e-08	0.00328663	0.0592784	0	0.579438	9.46405e-05	6.98091e-06	6.21725e-15	0.411807	6.27289e-11	0.017212	0.0995452	0	7.1242e-05	0		1.78179e-07	1.88034e-05	0	2.41838e-07	6.2114e-09
GLS2	1.36139e-05	3.85448e-05	0.125839	1.03497e-06	1.92299e-07	0.794359	0.0635208	3.84273e-11	0.000547864	0.455129	0.0119589	0.162186	0.000792507	0.348791	0.16919	0	0.11532	1.78179e-07		0.15128	4.16278e-05	1.86517e-14	0.0791509
DPP4	0.0393495	0.300202	0.0599892	0.00849619	0.0121992	0	0.630549	0.109333	0.138679	0.434116	0.78467	2.99359e-10	2.88065e-06	0.132408	0.639365	0.000299702	0	1.88034e-05	0.15128		1.90863e-05	0.296738	0.00401126
CS	0	0.0287748	5.82758e-11	0	2.37677e-12	0	0.0101476	9.5712e-06	0.333093	0	2.16244e-08	7.63247e-10	4.06652e-12	0.331926	0	1.28768e-06	0	0	4.16278e-05	1.90863e-05		0.361463	0.000271838
ALOX15	0.946317	9.31832e-06	0.00473854	0.357239	0.00599193	0.145566	0.613473	0.0990678	0.47327	5.40375e-05	0.835726	0.0271948	0.0714745	0.0268069	0.000486745	1.75488e-05	0.0909826	2.41838e-07	1.86517e-14	0.296738	0.361463		0.250418
ACSL4	0.00676291	0.97979	1.81183e-09	0.166084	0.0344093	0.976976	0.00264439	0.0457588	0.467095	3.18512e-06	0.299469	0.0562413	5.99667e-10	0.0262414	8.30826e-06	0.00213755	0.0144862	6.2114e-09	0.0791509	0.00401126	0.000271838	0.250418

[truncated: 20 more sheets: STES, STES-TCGA, Correlations in STES, Correlation-Spearman-STES, p value-STES, KIRC, KIRC-TCGA, Correlations in KIRC, Correlation-Spearman-KIRC, p value-KIRC, BLCA, BLCA-TCGA, Correlations in BLCA, Correlation-Spearman-BLCA, p value-BLCA, PRAD, PRAD-TCGA, Correlations in PRAD, Correlation-Spearman-PRAD, p value-PRAD]
